# Supplementary material for: Differential Stress Transcriptome Landscape of Historic and Recently Emerged Hypervirulent Strains of Clostridium difficile Strains Determined Using RNA-seq
Source: PLoS One. 2013 Nov 7;8(11):e78489. doi: 10.1371/journal.pone.0078489 (PMC3820578; doi:10.1371/journal.pone.0078489)
Supplement: File S2 — Details of differentially expressed genes during nutrient shift. Data for strains QCD-32g58, R20291, CD196 and CD630 are given in separate worksheets named after these strains. (XLSX) [file pone.0078489.s002.xlsx]

## Sheet: QCD_32g58
Differentially expressed genes in strain C. difficile 32g58 during nutrient shift
PATRIC_Locus	RefSeq_Locus	Start	End	Gene length	Strand	Gene product	FID	type	Ctrl	BDM	log2(fold_change)	test_stat	p_value	q_value
VBICloDif104613_2591	CdifQ_04003752	3601829	3602728	900	-	FIG00517118: hypothetical protein	29139697	core	7.29013	3286.34	8.81632	-22.0461	0	0
VBICloDif104613_2592	CdifQ_04003753	3602725	3603135	411	-	FIG00517118: hypothetical protein	29139699	core	21.5668	5314.8	7.94506	-19.8046	0	0
VBICloDif104613_2053	CdifQ_04003209	3021684	3022349	666	+	FIG00521194: hypothetical protein	29138620	core	8.38661	1182.59	7.13965	-15.468	0	0
VBICloDif104613_4006	CdifQ_04000914	904843	905928	1086	+	Homocitrate synthase (EC 2.3.3.14)	29134024	core	32.9127	4522.07	7.1022	-21.919	0	0
VBICloDif104613_4009	CdifQ_04000917	907901	908896	996	+	Isocitrate dehydrogenase [NAD] (EC 1.1.1.41)	29134030	core	40.6897	5290.48	7.02259	-21.6135	0	0
VBICloDif104613_4008	CdifQ_04000916	907508	907879	372	+	Aconitate hydratase (EC 4.2.1.3)	29134028	unique	10.2055	1231.69	6.91514	-14.4457	0	0
VBICloDif104613_4007	CdifQ_04000915	905953	907536	1584	+	Aconitate hydratase (EC 4.2.1.3)	29134026	core	84.5751	8369.97	6.62885	-23.1304	0	0
VBICloDif104613_0618	CdifQ_04001752	1672870	1673475	606	+	Imidazole glycerol phosphate synthase amidotransferase subunit (EC 2.4.2.-)	29135709	core	6.57905	399.819	5.92532	-13.0347	0	0
VBICloDif104613_0620	CdifQ_04001754	1674199	1674693	495	+	Imidazole glycerol phosphate synthase cyclase subunit (EC 4.1.3.-)	29135713	core	3.92977	213.153	5.7613	-9.99119	0	0
VBICloDif104613_4056	CdifQ_04000964	949514	950038	525	-	ABC transporter substrate-binding protein	29134125	unique	23.1598	1250.26	5.75446	-15.082	0	0
VBICloDif104613_0616	CdifQ_04001750	1671238	1672287	1050	+	Histidinol-phosphate aminotransferase (EC 2.6.1.9)	29135705	core	1.60301	74.661	5.5415	-9.04145	0	0
VBICloDif104613_0621	CdifQ_04001755	1674665	1674934	270	+	Imidazole glycerol phosphate synthase cyclase subunit (EC 4.1.3.-)	29135715	unique	24.8864	1134.91	5.51108	-11.3304	0	0
VBICloDif104613_0617	CdifQ_04001751	1672290	1672868	579	+	Imidazoleglycerol-phosphate dehydratase (EC 4.2.1.19)	29135707	core	9.38071	412.753	5.45944	-12.4773	0	0
VBICloDif104613_0619	CdifQ_04001753	1673472	1674194	723	+	Phosphoribosylformimino-5-aminoimidazole carboxamide ribotide isomerase (EC 5.3.1.16)	29135711	core	17.3951	747.605	5.42552	-14.299	0	0
VBICloDif104613_4057	CdifQ_04000965	950053	950550	498	-	ABC transporter substrate-binding protein	29134127	unique	89.0461	3602.37	5.33825	-16.7526	0	0
VBICloDif104613_2229	CdifQ_04003385	3215586	3215903	318	-	V-type ATP synthase subunit F (EC 3.6.3.14)	29138972	core	6.05399	229.732	5.24592	-7.17687	7.13207e-13	7.26029e-12
VBICloDif104613_0903	CdifQ_04002044	1915026	1916042	1017	+	NAD-dependent glyceraldehyde-3-phosphate dehydrogenase (EC 1.2.1.12)	29136293	core	43.1109	1491.83	5.11289	-16.6349	0	0
VBICloDif104613_0613	CdifQ_04001747	1669692	1670039	348	+	ATP phosphoribosyltransferase regulatory subunit (EC 2.4.2.17)	29135699	core	9.4459	313.464	5.05247	-9.08456	0	0
VBICloDif104613_0615	CdifQ_04001749	1670578	1671204	627	+	ATP phosphoribosyltransferase (EC 2.4.2.17)	29135703	core	10.4435	344.51	5.04387	-12.1068	0	0
VBICloDif104613_0413	CdifQ_04001542	1479027	1480013	987	+	Allophanate hydrolase 2 subunit 2 (EC 3.5.1.54)	29135290	core	87.7076	2877.54	5.03599	-17.9547	0	0
VBICloDif104613_0622	CdifQ_04001756	1674962	1675639	678	+	Phosphoribosyl-AMP cyclohydrolase (EC 3.5.4.19) / Phosphoribosyl-ATP pyrophosphatase (EC 3.6.1.31)	29135717	core	6.03265	197.273	5.03126	-10.1879	0	0
VBICloDif104613_0410	CdifQ_04001539	1476242	1477033	792	+	Lactam utilization protein LamB	29135284	core	24.1595	770.156	4.99449	-14.285	0	0
VBICloDif104613_0411	CdifQ_04001540	1477062	1478282	1221	+	Mn2+/Fe2+ transporter, NRAMP family	29135286	core	19.6836	611.885	4.9582	-14.9103	0	0
VBICloDif104613_4058	CdifQ_04000966	950647	951402	756	-	Methionine ABC transporter ATP-binding protein	29134129	core	34.5975	1075.23	4.95784	-14.8038	0	0
VBICloDif104613_1905	CdifQ_04003058	2854505	2855545	1041	+	Perfringolysin O regulator protein PfoR	29138318	core	39.4238	1217.13	4.94827	-15.998	0	0
VBICloDif104613_3620	CdifQ_04000525	494030	494710	681	-	Phosphoribosylaminoimidazole-succinocarboxamide synthase (EC 6.3.2.6)	29133240	core	102.124	3149.67	4.94681	-16.9367	0	0
VBICloDif104613_4075	CdifQ_04000984	968700	970175	1476	+	Arginine decarboxylase (EC 4.1.1.19)	29134164	core	10.285	281.818	4.77615	-13.3701	0	0
VBICloDif104613_3711	CdifQ_04000616	592351	592626	276	+	FIG00513568: hypothetical protein	29133422	core	1048.3	28044.6	4.74159	-17.3903	0	0
VBICloDif104613_0260	CdifQ_04001391	1336718	1338010	1293	+	Branched-chain amino acid transport system carrier protein	29134980	core	6.14851	150.327	4.61172	-11.7233	0	0
VBICloDif104613_2504	CdifQ_04003662	3512168	3512782	615	+	FIG00520542: hypothetical protein	29139523	core	1.04426	25.479	4.60875	-4.59123	4.40647e-06	2.20263e-05
VBICloDif104613_3427	CdifQ_04000321	301888	302292	405	+	PTS system, mannose-specific IIA component (EC 2.7.1.69)	29132842	core	2.07849	50.6911	4.60812	-4.59241	4.38167e-06	2.19325e-05
VBICloDif104613_0412	CdifQ_04001541	1478302	1478997	696	+	Allophanate hydrolase 2 subunit 1 (EC 3.5.1.54)	29135288	core	11.9974	292.563	4.60796	-11.4328	0	0
VBICloDif104613_1606	CdifQ_04002756	2569150	2570937	1788	-	Indolepyruvate oxidoreductase subunit IorA (EC 1.2.7.8)	29137715	core	16.0219	372.437	4.53888	-14.0886	0	0
VBICloDif104613_1545	CdifQ_04002693	2511949	2512407	459	-	PTS system, galactitol-specific IIA component (EC 2.7.1.69)	29137592	core	1.1044	24.6224	4.47863	-3.46459	0.000531049	0.00185228
VBICloDif104613_3237	CdifQ_04000127	111838	112053	216	+	2-oxoglutarate oxidoreductase, delta subunit, putative (EC 1.2.7.3)	29132457	core	677.337	14937.7	4.46294	-12.8285	0	0
VBICloDif104613_3240	CdifQ_04000130	113914	114471	558	+	2-oxoglutarate oxidoreductase, gamma subunit (EC 1.2.7.3)	29132463	core	891.21	19172.6	4.42713	-17.3094	0	0
VBICloDif104613_4076	CdifQ_04000985	970262	970675	414	+	S-adenosylmethionine decarboxylase proenzyme (EC 4.1.1.50), prokaryotic class 1B	29134166	core	44.4834	955.908	4.42553	-11.7881	0	0
VBICloDif104613_4033	CdifQ_04000941	927105	928673	1569	+	Oligopeptide ABC transporter, periplasmic oligopeptide-binding protein OppA (TC 3.A.1.5.1)	29134078	core	586.628	12106.2	4.36716	-16.3539	0	0
VBICloDif104613_2226	CdifQ_04003382	3211647	3212315	669	-	V-type ATP synthase subunit D (EC 3.6.3.14)	29138966	core	18.9298	388.802	4.36031	-11.4833	0	0
VBICloDif104613_2230	CdifQ_04003386	3215896	3216873	978	-	V-type ATP synthase subunit C (EC 3.6.3.14)	29138974	core	2.46784	48.6608	4.30144	-8.4226	0	0
VBICloDif104613_3351	CdifQ_04000242	230960	231658	699	+	Phosphoribosylaminoimidazole-succinocarboxamide synthase (EC 6.3.2.6)	29132689	core	60.0109	1171.99	4.2876	-13.4959	0	0
VBICloDif104613_3129	CdifQ_04000014	16084	18012	1929	+	Translation elongation factor G-related protein	29132233	core	52.2198	991.388	4.24678	-15.7776	0	0
VBICloDif104613_2148	CdifQ_04003305	3125680	3126870	1191	+	Biosynthetic Aromatic amino acid aminotransferase alpha (EC 2.6.1.57) @ Aspartate aminotransferase (EC 2.6.1.1)	29138810	core	1.19026	22.5312	4.24258	-6.69471	2.16107e-11	2.003e-10
VBICloDif104613_3239	CdifQ_04000129	113161	113913	753	+	Pyruvate synthase subunit porB (EC 1.2.7.1)	29132461	core	2172.04	41010.3	4.23887	-15.397	0	0
VBICloDif104613_2232	CdifQ_04003388	3217503	3217994	492	-	V-type ATP synthase subunit K (EC 3.6.3.14)	29138978	core	33.2171	626.786	4.23797	-11.2848	0	0
VBICloDif104613_1605	CdifQ_04002755	2568573	2569148	576	-	Indolepyruvate oxidoreductase subunit IorB (EC 1.2.7.8)	29137713	core	23.2433	436.987	4.2327	-11.0505	0	0
VBICloDif104613_3238	CdifQ_04000128	112082	113161	1080	+	2-oxoglutarate oxidoreductase, alpha subunit (EC 1.2.7.3)	29132459	core	1666.42	31188	4.22617	-14.985	0	0
VBICloDif104613_3352	CdifQ_04000243	231670	233037	1368	+	Amidophosphoribosyltransferase (EC 2.4.2.14)	29132691	core	156.861	2899.67	4.20833	-16.3259	0	0
VBICloDif104613_2231	CdifQ_04003387	3216888	3217451	564	-	V-type ATP synthase subunit E (EC 3.6.3.14)	29138976	core	10.1219	184.849	4.19079	-9.50472	0	0
VBICloDif104613_4077	CdifQ_04000986	970705	971556	852	+	Spermidine synthase (EC 2.5.1.16)	29134168	core	33.8348	601.956	4.15308	-12.4632	0	0
VBICloDif104613_1355	CdifQ_04002497	2330590	2331339	750	-	Siderophore biosynthesis diaminobutyrate--2-oxoglutarate aminotransferase (EC 2.6.1.76)	29137209	core	56.1504	980.769	4.12654	-13.1711	0	0
VBICloDif104613_1607	CdifQ_04002757	2570998	2572257	1260	-	Biosynthetic Aromatic amino acid aminotransferase alpha (EC 2.6.1.57) @ Aspartate aminotransferase (EC 2.6.1.1)	29137717	core	20.3665	347.086	4.09103	-12.1119	0	0
VBICloDif104613_3353	CdifQ_04000244	233031	234107	1077	+	Phosphoribosylformylglycinamidine cyclo-ligase (EC 6.3.3.1)	29132693	core	146.727	2486.92	4.08315	-15.5818	0	0
VBICloDif104613_3713	CdifQ_04000618	593406	593840	435	+	FIG00515128: hypothetical protein	29133426	shared	8.57677	145.19	4.08137	-8.26196	2.22045e-16	2.8136e-15
VBICloDif104613_2227	CdifQ_04003383	3212321	3213694	1374	-	V-type ATP synthase subunit B (EC 3.6.3.14)	29138968	core	36.2127	612.604	4.08039	-13.6961	0	0
VBICloDif104613_2228	CdifQ_04003384	3213691	3215469	1779	-	V-type ATP synthase subunit A (EC 3.6.3.14)	29138970	core	30.5798	515.408	4.07506	-13.9388	0	0
VBICloDif104613_2836	CdifQ_04003988	3843892	3844986	1095	-	FIG00520462: hypothetical protein	29140195	core	90.0695	1506.86	4.06436	-14.8411	0	0
VBICloDif104613_4078	CdifQ_04000987	971546	972424	879	+	Agmatinase (EC 3.5.3.11)	29134170	core	39.3328	654.599	4.05681	-12.53	0	0
VBICloDif104613_3350	CdifQ_04000241	230478	230954	477	+	Phosphoribosylaminoimidazole carboxylase catalytic subunit (EC 4.1.1.21)	29132687	core	389.516	6452.16	4.05003	-15.3741	0	0
VBICloDif104613_1354	CdifQ_04002496	2330129	2330590	462	-	Siderophore biosynthesis diaminobutyrate--2-oxoglutarate aminotransferase (EC 2.6.1.76)	29137207	unique	88.9924	1449.83	4.02605	-12.2973	0	0
VBICloDif104613_2644	CdifQ_04003806	3653418	3654473	1056	-	putative glucosamine-fructose-6-phosphate aminotransferase	29139804	core	14.3774	231.453	4.00885	-10.9641	0	0
VBICloDif104613_0261	CdifQ_04001392	1339128	1340420	1293	+	Branched-chain amino acid transport system carrier protein	29134982	core	1408.04	22534.8	4.00039	-14.3961	0	0
VBICloDif104613_2233	CdifQ_04003389	3217997	3219922	1926	-	V-type ATP synthase subunit I (EC 3.6.3.14)	29138980	core	39.2811	605.475	3.94616	-14.1319	0	0
VBICloDif104613_1596	CdifQ_04002746	2560814	2561728	915	-	Quinolinate synthetase (EC 2.5.1.72)	29137695	core	19.381	287.289	3.88979	-10.8671	0	0
VBICloDif104613_1657	CdifQ_04002805	2618157	2618603	447	-	PTS system, glucitol/sorbitol-specific IIB component and second of two IIC components (EC 2.7.1.69)	29137818	core	1.15657	16.1505	3.80366	-2.93575	0.00332745	0.00963925
VBICloDif104613_3431	CdifQ_04000325	303750	304505	756	+	PTS system, mannose-specific IIC component (EC 2.7.1.69)	29132850	core	3.6936	50.8557	3.78331	-7.63289	2.28706e-14	2.59009e-13
VBICloDif104613_0609	CdifQ_04001743	1667373	1667939	567	-	uncharacterized protein homolog YKRK B. subtilis	29135690	core	2.237	30.7586	3.78135	-5.48038	4.24409e-08	2.80668e-07
VBICloDif104613_3354	CdifQ_04000245	234101	234694	594	+	Phosphoribosylglycinamide formyltransferase (EC 2.1.2.2)	29132695	core	73.599	1007.76	3.77532	-11.8598	0	0
VBICloDif104613_3355	CdifQ_04000246	234687	236012	1326	+	IMP cyclohydrolase (EC 3.5.4.10) / Phosphoribosylaminoimidazolecarboxamide formyltransferase (EC 2.1.2.3)	29132697	core	36.3036	485.801	3.74218	-12.3947	0	0
VBICloDif104613_1544	CdifQ_04002692	2511613	2511888	276	-	PTS system, galactitol-specific IIB component (EC 2.7.1.69)	29137590	core	24.0047	321.101	3.74164	-7.40336	1.32783e-13	1.43216e-12
VBICloDif104613_0809	CdifQ_04001951	1840922	1841293	372	+	probable transcriptional regulator	29136100	core	3101.54	40274.3	3.6988	-14.7892	0	0
VBICloDif104613_1595	CdifQ_04002745	2559500	2560801	1302	-	L-aspartate oxidase (EC 1.4.3.16)	29137693	core	46.0438	596.933	3.69649	-12.7179	0	0
VBICloDif104613_1543	CdifQ_04002691	2510280	2511554	1275	-	PTS system, galactitol-specific IIC component (EC 2.7.1.69)	29137588	core	11.41	146.847	3.68595	-10.0555	0	0
VBICloDif104613_3345	CdifQ_04000236	226193	227458	1266	+	FIG00774563: hypothetical protein	29132677	core	4.67786	58.4409	3.64306	-8.58017	0	0
VBICloDif104613_4031	CdifQ_04000939	925186	926097	912	+	Oligopeptide transport system permease protein OppB (TC 3.A.1.5.1)	29134074	core	27.0171	334.716	3.63099	-10.6193	0	0
VBICloDif104613_3432	CdifQ_04000326	304505	305368	864	+	PTS system, mannose-specific IID component (EC 2.7.1.69)	29132852	core	1.36268	16.4334	3.59212	-5.30769	1.11023e-07	6.97309e-07
VBICloDif104613_2645	CdifQ_04003807	3654521	3655321	801	-	PTS system, mannose-specific IID component (EC 2.7.1.69)	29139806	core	21.1508	251.368	3.57101	-9.77265	0	0
VBICloDif104613_3356	CdifQ_04000247	236231	237481	1251	+	Phosphoribosylamine--glycine ligase (EC 6.3.4.13)	29132699	core	149.482	1775.64	3.5703	-13.9929	0	0
VBICloDif104613_3128	CdifQ_04000013	12412	15843	3432	+	Pyruvate carboxyl transferase (EC 6.4.1.1)	29132231	core	305.27	3617.07	3.56666	-13.8371	0	0
VBICloDif104613_2036	CdifQ_04003192	3001789	3003021	1233	-	Cytosine permease	29138586	core	3.63434	42.1584	3.53605	-7.60659	2.81997e-14	3.16395e-13
VBICloDif104613_3430	CdifQ_04000324	303235	303723	489	+	PTS system, mannose-specific IIB component (EC 2.7.1.69)	29132848	core	2.54607	29.3634	3.52767	-4.66183	3.13404e-06	1.60647e-05
VBICloDif104613_0808	CdifQ_04001950	1840551	1840919	369	+	transcriptional regulator, ArsR family/dinitrogenase iron-molybdenum cofactor family protein	29136098	core	141.001	1620.15	3.52235	-10.7497	0	0
VBICloDif104613_0608	CdifQ_04001742	1667024	1667233	210	+	FIG00517193: hypothetical protein	29135688	shared	42.7784	491.261	3.52153	-4.52378	6.0745e-06	2.98292e-05
VBICloDif104613_3567	CdifQ_04000468	441655	442029	375	+	D-Ornithine 4,5-aminomutase S subunit (EC 5.4.3.5)	29133131	core	2.32646	26.4507	3.5071	-3.39709	0.000681061	0.00231753
VBICloDif104613_3234	CdifQ_04000124	109125	110027	903	+	phosphotransbutyrylase (EC 2.3.1.19)	29132451	core	401.594	4317.95	3.42654	-13.9272	0	0
VBICloDif104613_2129	CdifQ_04003286	3108064	3108372	309	+	FIG00516231: hypothetical protein	29138772	core	2.7046	28.1663	3.38048	-2.70912	0.00674619	0.0177289
VBICloDif104613_3312	CdifQ_04000202	189689	190954	1266	+	NAD-specific glutamate dehydrogenase (EC 1.4.1.2)	29132610	core	2332.84	23682.2	3.34364	-12.0657	0	0
VBICloDif104613_3235	CdifQ_04000125	110049	111128	1080	+	Butyrate kinase (EC 2.7.2.7)	29132453	core	374.306	3791.21	3.34037	-13.613	0	0
VBICloDif104613_4032	CdifQ_04000940	926081	926992	912	+	Oligopeptide transport system permease protein oppC (TC 3.A.1.5.1)	29134076	core	162.968	1646.95	3.33714	-12.7473	0	0
VBICloDif104613_4088	CdifQ_04000997	981953	983089	1137	+	glycine betaine/L-proline transport, ATP-binding protein	29134190	core	122.421	1232.01	3.33108	-12.7631	0	0
VBICloDif104613_1594	CdifQ_04002744	2558683	2559519	837	-	Quinolinate phosphoribosyltransferase [decarboxylating] (EC 2.4.2.19)	29137691	core	29.1039	290.033	3.31694	-9.59321	0	0
VBICloDif104613_1497	CdifQ_04002644	2469982	2471313	1332	+	Sodium/glycine symporter GlyP	29137496	core	26.7472	262.015	3.29219	-10.3619	0	0
VBICloDif104613_3357	CdifQ_04000248	237506	241312	3807	+	Phosphoribosylformylglycinamidine synthase, synthetase subunit (EC 6.3.5.3) / Phosphoribosylformylglycinamidine synthase, glutamine amidotransferase subunit (EC 6.3.5.3)	29132701	core	248.451	2400.66	3.2724	-12.5485	0	0
VBICloDif104613_4035	CdifQ_04000943	929766	930710	945	+	Oligopeptide transport ATP-binding protein OppF (TC 3.A.1.5.1)	29134082	core	308.511	2975.3	3.26964	-13.2748	0	0
VBICloDif104613_2646	CdifQ_04003808	3655314	3656105	792	-	PTS system, mannose-specific IIC component (EC 2.7.1.69)	29139808	core	6.23291	59.3849	3.25212	-7.17569	7.19425e-13	7.30307e-12
VBICloDif104613_4145	CdifQ_04001051	1043187	1043486	300	+	Transcriptional regulator, MerR family, near polyamine transporter	29134305	core	4.30431	40.5869	3.23716	-3.2528	0.00114274	0.00368771
VBICloDif104613_3236	CdifQ_04000126	111118	111795	678	+	FIG00623394: hypothetical protein	29132455	core	378.248	3562.11	3.23533	-12.9091	0	0
VBICloDif104613_4089	CdifQ_04000998	983149	984630	1482	+	L-proline glycine betaine binding ABC transporter protein ProX (TC 3.A.1.12.1) / Osmotic adaptation	29134192	core	55.8055	525.074	3.23404	-11.6276	0	0
VBICloDif104613_1767	CdifQ_04002916	2714901	2716004	1104	+	Histidinol-phosphate aminotransferase (EC 2.6.1.9)	29138040	core	15.8999	149.275	3.23088	-8.92156	0	0
VBICloDif104613_3097	CdifQ_04004252	4083132	4084328	1197	-	Aspartate aminotransferase (AspB-4) (EC 2.6.1.1)	29140732	core	6629.35	62091.9	3.22746	-10.0284	0	0
VBICloDif104613_3943	CdifQ_04000851	846123	846587	465	+	FIG00521263: hypothetical protein	29133897	core	1.22491	11.2677	3.20145	-2.66455	0.00770921	0.0199701
VBICloDif104613_1648	CdifQ_04002796	2608744	2608989	246	-	FIG00520139: hypothetical protein	29137800	core	4.35432	39.5119	3.18177	-2.30109	0.0213863	0.0488983
VBICloDif104613_2648	CdifQ_04003810	3656583	3657062	480	-	PTS system, mannose-specific IIB component (EC 2.7.1.69)	29139812	core	7.14403	64.4981	3.17445	-6.14562	7.96528e-10	6.30266e-09
VBICloDif104613_3944	CdifQ_04000852	846601	847746	1146	+	Catalyzes the cleavage of p-aminobenzoyl-glutamate to p-aminobenzoate and glutamate, subunit A	29133899	core	14.0926	126.155	3.16218	-8.60918	0	0
VBICloDif104613_4066	CdifQ_04000975	959775	960017	243	+	Glucose-1-phosphate adenylyltransferase (EC 2.7.7.27)	29134146	unique	10.479	91.8885	3.13239	-3.53303	0.000410829	0.00146829
VBICloDif104613_4034	CdifQ_04000942	928748	929773	1026	+	Oligopeptide transport ATP-binding protein OppD (TC 3.A.1.5.1)	29134080	core	403	3525.64	3.12904	-12.9044	0	0
VBICloDif104613_3530	CdifQ_04000429	409386	410606	1221	-	FIG00522961: hypothetical protein	29133056	shared	25.6202	222.809	3.12045	-9.44522	0	0
VBICloDif104613_3635	CdifQ_04000540	510539	511717	1179	+	FIG00519258: hypothetical protein	29133270	core	682.065	5811.34	3.09089	-12.69	0	0
VBICloDif104613_2035	CdifQ_04003191	3000969	3001775	807	-	Nitrilase/cyanide hydratase and apolipoprotein N-acyltransferase	29138584	core	36.1383	303.448	3.06985	-9.08767	0	0
VBICloDif104613_3433	CdifQ_04000327	305415	305900	486	+	FIG00518116: hypothetical protein	29132854	core	18.724	157.067	3.06842	-7.12804	1.01807e-12	1.02202e-11
VBICloDif104613_1031	CdifQ_04002172	2044663	2045154	492	-	FIG042921: similarity to aminoacyl-tRNA editing enzymes YbaK, ProX	29136558	core	23.2132	191.016	3.04068	-6.90085	5.1692e-12	5.00887e-11
VBICloDif104613_2394	CdifQ_04003550	3400284	3401936	1653	-	PTS system, N-acetylglucosamine-specific IIA component (EC 2.7.1.69) / PTS system, N-acetylglucosamine-specific IIB component (EC 2.7.1.69) / PTS system, N-acetylglucosamine-specific IIC component (EC 2.7.1.69)	29139303	core	1.65291	13.2352	3.00129	-6.00297	1.93735e-09	1.497e-08
VBICloDif104613_4044	CdifQ_04000952	938487	939341	855	+	COG2110, Macro domain, possibly ADP-ribose binding module	29134101	core	169.076	1349.06	2.99621	-11.5004	0	0
VBICloDif104613_3945	CdifQ_04000853	847790	848725	936	+	FIG00514912: hypothetical protein	29133901	core	26.4045	210.454	2.99465	-8.65046	0	0
VBICloDif104613_2374	CdifQ_04003531	3371218	3372450	1233	-	PTS system, cellobiose-specific IIC component (EC 2.7.1.69)	29139263	core	0.785943	6.17982	2.97507	-4.13381	3.56798e-05	0.0001543
VBICloDif104613_0986	CdifQ_04002126	1995706	1996167	462	+	Shikimate 5-dehydrogenase I alpha (EC 1.1.1.25)	29136466	core	32.283	252.694	2.96854	-6.89532	5.37437e-12	5.19379e-11
VBICloDif104613_2597	CdifQ_04003758	3608604	3609611	1008	-	Proline racemase (EC 5.1.1.4)	29139709	core	483.214	3745.02	2.95424	-12.2698	0	0
VBICloDif104613_2647	CdifQ_04003809	3656145	3656567	423	-	PTS system, mannose-specific IIA component (EC 2.7.1.69)	29139810	core	2.17396	16.6777	2.93953	-3.04155	0.0023536	0.00706081
VBICloDif104613_0980	CdifQ_04002120	1989992	1991005	1014	+	2-keto-3-deoxy-D-arabino-heptulosonate-7-phosphate synthase I beta (EC 2.5.1.54)	29136454	core	42.4287	322.757	2.92734	-9.32702	0	0
VBICloDif104613_3872	CdifQ_04000779	773427	774206	780	+	CO dehydrogenase accessory protein CooC (nickel insertion)	29133751	core	304.236	2310.63	2.92502	-11.73	0	0
VBICloDif104613_1649	CdifQ_04002797	2609203	2611830	2628	-	Pyruvate,phosphate dikinase (EC 2.7.9.1)	29137802	core	253.849	1909.71	2.91131	-12.0831	0	0
VBICloDif104613_2505	CdifQ_04003663	3512800	3513162	363	+	Transcriptional regulator, HxlR family	29139525	shared	13.2788	99.8689	2.91092	-5.40008	6.66124e-08	4.28192e-07
VBICloDif104613_0987	CdifQ_04002127	1996142	1996516	375	+	Shikimate 5-dehydrogenase I alpha (EC 1.1.1.25)	29136468	unique	7.28676	54.0135	2.88997	-4.63467	3.57505e-06	1.82432e-05
VBICloDif104613_3557	CdifQ_04000458	432697	433857	1161	+	FIG00514915: hypothetical protein	29133110	core	155.009	1138.09	2.87619	-11.3491	0	0
VBICloDif104613_2152	CdifQ_04003309	3129352	3132105	2754	-	FIG00515698: hypothetical protein	29138818	core	38.8459	283.602	2.86804	-10.8523	0	0
VBICloDif104613_4069	CdifQ_04000978	961419	962315	897	+	Glycogen synthase, ADP-glucose transglucosylase (EC 2.4.1.21)	29134152	core	6.83118	49.2102	2.84875	-6.44463	1.15884e-10	9.95174e-10
VBICloDif104613_3959	CdifQ_04000866	861214	861657	444	+	Bis(5'-nucleosyl)-tetraphosphatase (Asymmetrical) (EC 3.6.1.17)	29133929	core	407.637	2934.81	2.84791	-10.6009	0	0
VBICloDif104613_2760		3756591	3756911	321	+	hypothetical protein	29140037	shared	12.5229	88.6596	2.82371	-5.23756	1.62712e-07	9.94381e-07
VBICloDif104613_3343	CdifQ_04000234	224659	225714	1056	+	PTS system, fructose-specific IIC component (EC 2.7.1.69)	29132673	core	2.57406	18.0224	2.80767	-5.48074	4.23546e-08	2.80609e-07
VBICloDif104613_2690	CdifQ_04003853	3700624	3701457	834	-	Formate dehydrogenase chain D (EC 1.2.1.2)	29139896	core	16.9269	113.749	2.74847	-6.75964	1.38334e-11	1.30553e-10
VBICloDif104613_4045	CdifQ_04000953	939654	940526	873	+	FIG00514005: hypothetical protein	29134103	core	51.9793	349.188	2.74799	-8.75988	0	0
VBICloDif104613_2904	CdifQ_04004053	3901852	3902130	279	-	Protein of unknown function identified by role in sporulation (SpoVG)	29140331	core	1628.62	10910.8	2.74404	-10.7767	0	0
VBICloDif104613_1965	CdifQ_04003118	2918063	2919241	1179	+	Acetyl-CoA acetyltransferase (EC 2.3.1.9)	29138438	core	0.722377	4.60323	2.67182	-3.35356	0.000797789	0.00266469
VBICloDif104613_0944	CdifQ_04002084	1953691	1954581	891	+	putative hydrolase	29136378	core	3.37637	21.3409	2.66008	-4.86803	1.12715e-06	6.15177e-06
VBICloDif104613_4065	CdifQ_04000974	959098	959766	669	+	Glucose-1-phosphate adenylyltransferase (EC 2.7.7.27)	29134144	core	55.0609	347.677	2.65865	-8.00571	1.11022e-15	1.35015e-14
VBICloDif104613_2693	CdifQ_04003856	3702538	3703650	1113	-	Formate dehydrogenase H (EC 1.2.1.2) @ selenocysteine-containing	29139902	core	66.076	416.021	2.65446	-9.27825	0	0
VBICloDif104613_4068	CdifQ_04000977	960260	961390	1131	+	Glycogen biosynthesis protein GlgD, glucose-1-phosphate adenylyltransferase family	29134150	core	10.2863	64.2551	2.64309	-6.52291	6.89553e-11	6.0507e-10
VBICloDif104613_3870	CdifQ_04000778	771198	773117	1920	+	Similar to carbon monoxide dehydrogenase CooS subunit	29133747	core	426.808	2647.94	2.63321	-10.9975	0	0
VBICloDif104613_0674	CdifQ_04001812	1718283	1719779	1497	+	Ribose ABC transport system, ATP-binding protein RbsA (TC 3.A.1.2.1)	29135824	core	1.37086	8.44811	2.62354	-4.68472	2.80345e-06	1.44725e-05
VBICloDif104613_2691	CdifQ_04003854	3701506	3702051	546	-	Formate dehydrogenase H (EC 1.2.1.2) @ selenocysteine-containing	29139898	unique	161.497	990.63	2.61684	-9.06154	0	0
VBICloDif104613_0675	CdifQ_04001813	1719802	1720752	951	+	Ribose ABC transport system, permease protein RbsC (TC 3.A.1.2.1)	29135826	core	2.71317	16.6203	2.61489	-5.01665	5.25793e-07	2.9773e-06
VBICloDif104613_1604	CdifQ_04002754	2567450	2568520	1071	-	Butyrate kinase (EC 2.7.2.7)	29137711	core	316.383	1925.83	2.60574	-10.7507	0	0
VBICloDif104613_2151	CdifQ_04003308	3129153	3129371	219	-	FIG00515698: hypothetical protein	29138816	unique	103.514	621.117	2.58504	-5.19706	2.02465e-07	1.21882e-06
VBICloDif104613_2373	CdifQ_04003530	3370836	3371189	354	-	PTS system, cellobiose-specific IIA component (EC 2.7.1.69)	29139261	core	3.14088	18.7645	2.57876	-2.57938	0.00989788	0.0247892
VBICloDif104613_3873	CdifQ_04000780	774455	776131	1677	+	Formate--tetrahydrofolate ligase (EC 6.3.4.3)	29133753	core	344.86	2019.17	2.54968	-10.709	0	0
VBICloDif104613_1798	CdifQ_04002948	2745165	2746307	1143	-	Serine--glyoxylate aminotransferase (EC 2.6.1.45)	29138103	core	18.1514	106.25	2.54932	-7.05249	1.75748e-12	1.7402e-11
VBICloDif104613_2843	CdifQ_04003995	3849796	3850257	462	-	Inosine-5'-monophosphate dehydrogenase (EC 1.1.1.205)	29140209	core	19.8286	114.905	2.53479	-5.52593	3.27739e-08	2.20767e-07
VBICloDif104613_3881	CdifQ_04000788	782709	784076	1368	+	Acetyl-CoA synthase corrinoid iron-sulfur protein, large subunit	29133769	core	281.107	1610.92	2.51869	-10.512	0	0
VBICloDif104613_2126	CdifQ_04003283	3105180	3106070	891	-	2-hydroxy-3-oxopropionate reductase (EC 1.1.1.60)	29138766	core	1.28988	7.35778	2.51203	-3.53841	0.000402543	0.00144356
VBICloDif104613_3342	CdifQ_04000233	224205	224657	453	+	PTS system, fructose-specific IIA component (EC 2.7.1.69)	29132671	core	2.04653	11.4738	2.48709	-2.6169	0.00887319	0.0225659
VBICloDif104613_3883	CdifQ_04000790	784989	787115	2127	+	CO dehydrogenase/acetyl-CoA synthase, acetyl-CoA synthase subunit (EC 2.3.1.169)	29133773	core	470.338	2627.81	2.48209	-10.3705	0	0
VBICloDif104613_0676	CdifQ_04001814	1720773	1721735	963	+	Ribose ABC transport system, periplasmic ribose-binding protein RbsB (TC 3.A.1.2.1)	29135828	core	9.13051	50.9743	2.481	-5.94096	2.83362e-09	2.14647e-08
VBICloDif104613_2688	CdifQ_04003850	3699831	3700382	552	-	Fe-S-cluster-containing hydrogenase components 2	29139892	core	31.616	175.417	2.47206	-6.27205	3.56336e-10	2.90847e-09
VBICloDif104613_1274	CdifQ_04002416	2255594	2256232	639	-	Transcriptional regulator, DeoR family	29137045	core	0.888277	4.90384	2.46483	-2.39235	0.016741	0.0394726
VBICloDif104613_3882	CdifQ_04000789	784126	784932	807	+	5-methyltetrahydrofolate:corrinoid iron-sulfur protein methyltransferase	29133771	core	758.154	4181.77	2.46355	-10.3981	0	0
VBICloDif104613_0988	CdifQ_04002128	1996528	1997061	534	+	Shikimate kinase I (EC 2.7.1.71)	29136470	core	45.8284	249.848	2.44674	-6.65473	2.8382e-11	2.61056e-10
VBICloDif104613_1968	CdifQ_04003121	2920676	2921452	777	+	D-beta-hydroxybutyrate dehydrogenase (EC 1.1.1.30)	29138444	core	3.25834	17.6726	2.4393	-4.43228	9.32415e-06	4.44615e-05
VBICloDif104613_0771	CdifQ_04001913	1814250	1815212	963	+	Cysteine synthase (EC 2.5.1.47)	29136023	core	161.217	872.041	2.43539	-9.44459	0	0
VBICloDif104613_3291	CdifQ_04000180	166752	168173	1422	+	Transcriptional regulatory protein	29132568	core	7.1596	38.533	2.42814	-5.9679	2.40325e-09	1.83355e-08
VBICloDif104613_3294	CdifQ_04000184	170277	170570	294	+	FIG00514748: hypothetical protein	29132574	core	4.36191	23.4676	2.42764	-2.33128	0.0197384	0.0455328
VBICloDif104613_1575	CdifQ_04002725	2545161	2546312	1152	-	Glycine reductase component B beta subunit (EC 1.21.4.2) / Glycine reductase component B alpha subunit (EC 1.21.4.2)	29137653	core	1.3576	7.30378	2.42759	-3.94251	8.0634e-05	0.000326136
VBICloDif104613_2841	CdifQ_04003993	3848013	3849170	1158	-	Alanine racemase (EC 5.1.1.1)	29140205	core	334.173	1753.99	2.39198	-9.97813	0	0
VBICloDif104613_0985	CdifQ_04002125	1994463	1995659	1197	+	Chorismate mutase I (EC 5.4.99.5) / Prephenate dehydratase (EC 4.2.1.51)	29136464	core	6.78624	35.5417	2.38883	-5.20722	1.91694e-07	1.15977e-06
VBICloDif104613_3670	CdifQ_04000575	547381	548037	657	+	conserved hypothetical protein	29133340	core	4.3353	22.6114	2.38285	-4.43987	9.00141e-06	4.30926e-05
VBICloDif104613_3884	CdifQ_04000791	787202	787579	378	+	Glycine cleavage system H protein	29133775	core	2300.47	11983.5	2.38104	-10.0736	0	0
VBICloDif104613_2687	CdifQ_04003849	3698430	3699806	1377	-	Periplasmic [Fe] hydrogenase large subunit (EC 1.12.7.2)	29139890	core	66.54	345.926	2.37817	-8.65249	0	0
VBICloDif104613_3540	CdifQ_04000439	417843	418286	444	-	hypothetical protein	29133076	shared	143.106	737.689	2.36593	-7.38923	1.4766e-13	1.58319e-12
VBICloDif104613_2686	CdifQ_04003848	3697915	3698430	516	-	Fe-S-cluster-containing hydrogenase components 2	29139888	core	331.466	1695.6	2.35486	-8.96001	0	0
VBICloDif104613_1366	CdifQ_04002508	2341433	2343025	1593	-	Hydroxylamine reductase (EC 1.7.-.-)	29137231	core	50.2887	256.94	2.35313	-8.38574	0	0
VBICloDif104613_1653	CdifQ_04002801	2613990	2615105	1116	-	Homoserine dehydrogenase (EC 1.1.1.3); Sorbitol-6-phosphate 2-dehydrogenase (EC 1.1.1.140)	29137810	core	2.79542	14.1949	2.34424	-4.63443	3.57918e-06	1.82432e-05
VBICloDif104613_3958	CdifQ_04000865	860451	861128	678	+	FOG: HEAT repeat	29133927	core	365.003	1823.45	2.32069	-9.34789	0	0
VBICloDif104613_3532	CdifQ_04000431	412450	413025	576	+	hypothetical protein	29133060	shared	11.7772	58.317	2.30791	-4.62888	3.67656e-06	1.8687e-05
VBICloDif104613_0196	CdifQ_04001324	1283297	1283776	480	-	putative acetyltransferase	29134850	core	32.9708	163.074	2.30627	-4.92182	8.57446e-07	4.75135e-06
VBICloDif104613_2442	CdifQ_04003600	3451454	3453361	1908	-	transcription antiterminator	29139399	core	1.35681	6.66003	2.29531	-4.45697	8.31276e-06	4.00072e-05
VBICloDif104613_3880	CdifQ_04000787	781734	782678	945	+	Acetyl-CoA synthase corrinoid iron-sulfur protein, small subunit	29133767	core	173.622	835.332	2.2664	-8.81161	0	0
VBICloDif104613_3153	CdifQ_04000039	45237	46586	1350	+	PTS system, galactitol-specific IIC component (EC 2.7.1.69)	29132282	core	2.03148	9.75314	2.26333	-4.42056	9.84447e-06	4.66968e-05
VBICloDif104613_4146	CdifQ_04001052	1043488	1043727	240	+	Transcriptional regulator, MerR family, near polyamine transporter	29134307	unique	538.804	2581.67	2.26047	-6.59533	4.24314e-11	3.79682e-10
VBICloDif104613_3290	CdifQ_04000179	165291	166730	1440	+	FIG00517584: hypothetical protein	29132566	core	4.75658	22.7795	2.25974	-5.22124	1.77728e-07	1.08068e-06
VBICloDif104613_2234	CdifQ_04003390	3219924	3220235	312	-	V-type ATP synthase subunit G (EC 3.6.3.14)	29138982	core	199.055	950.594	2.25566	-6.54944	5.7752e-11	5.12974e-10
VBICloDif104613_3270	CdifQ_04000158	141484	142035	552	+	Ribosomal subunit interface protein	29132526	core	4275.63	20161.7	2.23741	-9.07384	0	0
VBICloDif104613_4067	CdifQ_04000976	959995	960258	264	+	Glucose-1-phosphate adenylyltransferase (EC 2.7.7.27)	29134148	unique	63.1586	297.386	2.23528	-4.7373	2.16584e-06	1.13425e-05
VBICloDif104613_3618	CdifQ_04000523	492368	493195	828	-	FIG003879: Predicted amidohydrolase / Omega amidase (Nit2 homolog)	29133236	core	62.5186	293.468	2.23085	-7.15976	8.08242e-13	8.15897e-12
VBICloDif104613_2596	CdifQ_04003757	3607603	3608484	882	-	Integral membrane protein	29139707	core	436.501	2040.75	2.22504	-9.29685	0	0
VBICloDif104613_1447	CdifQ_04002592	2419073	2420575	1503	-	Predicted sialic acid transporter	29137394	core	19.3174	88.6395	2.19805	-6.46053	1.04336e-10	9.00273e-10
VBICloDif104613_3344	CdifQ_04000235	225781	226089	309	+	PTS system, fructose-specific IIB component (EC 2.7.1.69)	29132675	core	8.64097	39.5914	2.19592	-3.21012	0.00132681	0.00422155
VBICloDif104613_0534	CdifQ_04001667	1593687	1594679	993	+	Alkanesulfonates-binding protein	29135538	core	191.341	860.381	2.16883	-8.6011	0	0
VBICloDif104613_4147	CdifQ_04001053	1043746	1044789	1044	+	Putrescine transport ATP-binding protein PotA (TC 3.A.1.11.1)	29134309	core	195.996	873.219	2.15552	-8.60615	0	0
VBICloDif104613_0219	CdifQ_04001348	1305426	1306853	1428	+	cell surface protein	29134897	core	109.441	485.338	2.14884	-8.41375	0	0
VBICloDif104613_2124	CdifQ_04003281	3102296	3103591	1296	-	FIG00513391: hypothetical protein	29138762	core	1.02458	4.53934	2.14744	-3.39219	0.000693376	0.00235501
VBICloDif104613_3879	CdifQ_04000786	780945	781715	771	+	CO dehydrogenase accessory protein CooC (nickel insertion)	29133765	core	262.265	1155.85	2.13986	-8.45751	0	0
VBICloDif104613_3869	CdifQ_04000777	769679	770590	912	+	Phosphate butyryltransferase (EC 2.3.1.19)	29133745	core	214.186	938.604	2.13165	-8.46278	0	0
VBICloDif104613_3445	CdifQ_04000340	317408	318919	1512	+	Ribose ABC transport system, ATP-binding protein RbsA (TC 3.A.1.2.1)	29132878	core	1.09965	4.80676	2.12802	-3.67355	0.000239206	0.000892772
VBICloDif104613_1542	CdifQ_04002690	2509099	2510151	1053	-	Galactitol-1-phosphate 5-dehydrogenase (EC 1.1.1.251)	29137586	core	3.20757	13.9266	2.11829	-4.21711	2.47448e-05	0.000110302
VBICloDif104613_3255	CdifQ_04000146	128784	129881	1098	+	FIG00513310: hypothetical protein	29132495	core	2.37755	10.2487	2.1079	-3.85667	0.000114944	0.000451308
VBICloDif104613_1882	CdifQ_04003036	2831902	2833293	1392	+	FIG00520514: hypothetical protein	29138272	core	9.48749	40.8875	2.10756	-5.34645	8.96975e-08	5.67301e-07
VBICloDif104613_2003	CdifQ_04003156	2959095	2961017	1923	-	2,4-dienoyl-CoA reductase [NADPH] (EC 1.3.1.34)	29138514	core	5.06797	21.745	2.10121	-5.13869	2.76664e-07	1.63295e-06
VBICloDif104613_2780	CdifQ_04003929	3778542	3780428	1887	+	NAD-reducing hydrogenase subunit HoxF (EC 1.12.1.2)	29140077	core	82.1633	350.611	2.0933	-8.21538	2.22045e-16	2.8136e-15
VBICloDif104613_1883	CdifQ_04003037	2833346	2835976	2631	+	FIG00514313: hypothetical protein	29138274	core	22.8071	97.083	2.08974	-7.09802	1.26565e-12	1.26356e-11
VBICloDif104613_1577	CdifQ_04002727	2546981	2547880	900	-	Thioredoxin reductase (EC 1.8.1.9)	29137657	core	6.2517	26.5594	2.0869	-4.47496	7.64261e-06	3.70774e-05
VBICloDif104613_0389	CdifQ_04001517	1457748	1458176	429	+	Phage-like element PBSX protein xkdS	29135242	core	3.67522	15.3594	2.06322	-2.80892	0.00497083	0.013614
VBICloDif104613_4072	CdifQ_04000981	963163	965295	2133	+	Glycogen phosphorylase (EC 2.4.1.1)	29134158	core	87.5209	364.871	2.05969	-8.24007	2.22045e-16	2.8136e-15
VBICloDif104613_4070	CdifQ_04000979	962312	962860	549	+	Glycogen synthase, ADP-glucose transglucosylase (EC 2.4.1.21)	29134154	core	122.406	510.163	2.05928	-6.64409	3.05107e-11	2.77816e-10
VBICloDif104613_3927	CdifQ_04000834	832915	833283	369	+	PTS system, glucitol/sorbitol-specific IIB component and second of two IIC components (EC 2.7.1.69)	29133865	core	5.11763	21.2299	2.05255	-2.83443	0.00459077	0.0127584
VBICloDif104613_3942	CdifQ_04000850	845266	846108	843	+	FIG00519676: hypothetical protein	29133895	core	18.424	76.4072	2.05213	-5.25419	1.48678e-07	9.16342e-07
VBICloDif104613_0945	CdifQ_04002085	1954800	1955648	849	+	Cwp66 homolog/N-acetylmuramoyl-L-alanine amidase (EC 3.5.1.28)	29136380	core	14.4236	59.6181	2.04732	-4.83747	1.31501e-06	7.08113e-06
VBICloDif104613_3422	CdifQ_04000316	296866	297261	396	+	FIG00516345: hypothetical protein	29132831	core	95.9825	391.475	2.02808	-5.63658	1.73462e-08	1.20196e-07
VBICloDif104613_1448	CdifQ_04002593	2420608	2421489	882	-	N-acetylneuraminate lyase (EC 4.1.3.3)	29137396	core	9.92772	40.2496	2.01944	-4.72729	2.27539e-06	1.18818e-05
VBICloDif104613_2382	CdifQ_04003539	3383083	3384414	1332	-	PTS system, N-acetylglucosamine-specific IIA component (EC 2.7.1.69) / PTS system, N-acetylglucosamine-specific IIB component (EC 2.7.1.69) / PTS system, N-acetylglucosamine-specific IIC component (EC 2.7.1.69)	29139279	core	5.99896	24.0899	2.00564	-4.66828	3.03734e-06	1.55911e-05
VBICloDif104613_3541	CdifQ_04000440	418504	418947	444	-	hypothetical protein	29133078	shared	145.23	582.846	2.00477	-6.27134	3.57959e-10	2.91516e-09
VBICloDif104613_3285	CdifQ_04000174	157894	158844	951	+	Pyruvate formate-lyase activating enzyme (EC 1.97.1.4)	29132556	core	29.1817	116.449	1.99656	-5.67511	1.38603e-08	9.71565e-08
VBICloDif104613_1797	CdifQ_04002947	2744622	2745146	525	-	Substrate-specific component PdxU2 of predicted pyridoxin-related ECF transporter	29138101	core	28.4235	113.397	1.99623	-4.90438	9.37226e-07	5.16972e-06
VBICloDif104613_3028	CdifQ_04004181	4020821	4023253	2433	+	FIG00627334: hypothetical protein	29140586	core	0.33359	1.32906	1.99426	-2.52849	0.0114553	0.0282025
VBICloDif104613_2408	CdifQ_04003564	3416701	3417909	1209	-	FIG00515407: hypothetical protein	29139331	core	0.762627	3.02736	1.98901	-2.62365	0.00869941	0.0222332
VBICloDif104613_2461	CdifQ_04003616	3471711	3473330	1620	-	hypothetical protein	29139437	shared	3.52989	13.994	1.98711	-4.2982	1.72187e-05	7.91886e-05
VBICloDif104613_3155	CdifQ_04000041	47266	47916	651	+	Ribulose-5-phosphate 4-epimerase and related epimerases and aldolases	29132286	core	3.20404	12.6627	1.98262	-3.3507	0.000806083	0.00268991
VBICloDif104613_3037	CdifQ_04004191	4031366	4032277	912	+	Cobalt-zinc-cadmium resistance protein	29140604	shared	4.16412	16.4033	1.9779	-4.02264	5.75486e-05	0.000239445
VBICloDif104613_3282	CdifQ_04000171	154931	157528	2598	+	Pyruvate formate-lyase (EC 2.3.1.54)	29132550	core	24.6904	97.2219	1.97733	-6.77617	1.23406e-11	1.17074e-10
VBICloDif104613_1572	CdifQ_04002720	2541312	2542844	1533	-	Glycine/sarcosine/betaine reductase component C chain 1	29137647	core	3.58024	14.0631	1.97379	-4.27166	1.94023e-05	8.77828e-05
VBICloDif104613_2477	CdifQ_04003634	3486884	3487648	765	-	CRISPR repeat RNA endoribonuclease Cas6	29139469	shared	3.00164	11.7687	1.97113	-3.48435	0.000493333	0.00173577
VBICloDif104613_0767	CdifQ_04001908	1807351	1807668	318	-	conserved hypothetical protein	29136015	core	394.048	1538.21	1.96481	-6.42771	1.29537e-10	1.10457e-09
VBICloDif104613_3566	CdifQ_04000467	440148	441578	1431	+	2-amino-4-ketopentanoate thiolase, beta subunit	29133129	core	2.40364	9.35105	1.9599	-3.94351	8.02983e-05	0.000325141
VBICloDif104613_3292	CdifQ_04000181	168397	169272	876	+	FIG00528932: hypothetical protein	29132570	core	12.3415	47.8102	1.9538	-4.56539	4.98568e-06	2.47508e-05
VBICloDif104613_3878	CdifQ_04000785	779504	780889	1386	+	Dihydrolipoamide dehydrogenase (EC 1.8.1.4)	29133763	core	133.147	514.658	1.95059	-7.74889	9.32587e-15	1.09375e-13
VBICloDif104613_3284	CdifQ_04000173	157644	157901	258	+	4-hydroxyphenylacetate decarboxylase, regulatory subunit	29132554	core	35.5048	136.561	1.94346	-3.73955	0.000184354	0.000700312
VBICloDif104613_4073	CdifQ_04000982	965300	967165	1866	+	Neopullulanase (EC 3.2.1.135)	29134160	core	49.1193	188.707	1.94178	-7.0332	2.01861e-12	1.98789e-11
VBICloDif104613_0353	CdifQ_04001482	1427923	1428204	282	-	Aspartate aminotransferase (EC 2.6.1.1)	29135169	unique	350.014	1342.31	1.93923	-5.84787	4.97898e-09	3.67491e-08
VBICloDif104613_2842	CdifQ_04003994	3849185	3849775	591	-	Membrane associated protein	29140207	core	37.0393	141.623	1.93493	-5.01808	5.21916e-07	2.95997e-06
VBICloDif104613_2761		3757328	3757705	378	-	FIG00524219: hypothetical protein	29140039	shared	6.43321	24.5947	1.93474	-2.88473	0.00391744	0.0111348
VBICloDif104613_0981	CdifQ_04002121	1991027	1991635	609	+	3-dehydroquinate synthase (EC 4.2.3.4)	29136456	core	56.1049	213.73	1.92959	-5.52734	3.25119e-08	2.1941e-07
VBICloDif104613_2253	CdifQ_04003409	3243496	3244410	915	-	CRISPR-associated negative autoregulator	29139020	core	20.0967	76.44	1.92737	-4.98683	6.13774e-07	3.44322e-06
VBICloDif104613_3891	CdifQ_04000798	793106	793456	351	+	FIG00516495: hypothetical protein	29133789	core	1928.42	7312.88	1.92302	-8.07806	6.66134e-16	8.23914e-15
VBICloDif104613_3621	CdifQ_04000526	495106	496158	1053	+	Galactitol-1-phosphate 5-dehydrogenase (EC 1.1.1.251)	29133242	core	0.852474	3.20728	1.91162	-2.38372	0.0171386	0.0402009
VBICloDif104613_2692	CdifQ_04003855	3702158	3702439	282	-	Formate dehydrogenase H (EC 1.2.1.2) @ selenocysteine-containing	29139900	unique	57.2624	215.079	1.90921	-4.1777	2.94472e-05	0.000129354
VBICloDif104613_0544	CdifQ_04001679	1603582	1604967	1386	+	FIG00519132: hypothetical protein	29135558	core	16.7745	62.0599	1.88739	-5.0151	5.3005e-07	2.99206e-06
VBICloDif104613_3035	CdifQ_04004188	4029976	4030659	684	+	FIG00526416: hypothetical protein	29140600	shared	4.94838	18.1627	1.87595	-3.64225	0.000270266	0.000999434
VBICloDif104613_1462	CdifQ_04002608	2434953	2435774	822	-	ATPase associated with various cellular activities, AAA_5	29137425	core	48.2938	175.575	1.86218	-5.59396	2.21953e-08	1.52341e-07
VBICloDif104613_1574	CdifQ_04002723	2544442	2544915	474	-	Glycine/sarcosine/betaine reductase protein A @ selenocysteine-containing	29137651	core	4.54572	16.5078	1.86057	-3.06453	0.00218009	0.00658388
VBICloDif104613_2685	CdifQ_04003847	3696555	3697838	1284	+	probable transporter	29139886	core	3.38236	12.2823	1.86048	-3.8871	0.000101447	0.000402677
VBICloDif104613_2601	CdifQ_04003762	3611451	3612176	726	-	D-proline reductase, 26 kDa subunit (EC 1.21.4.1) @ selenocysteine-containing	29139717	core	1946.22	7065.52	1.86012	-7.96166	1.77636e-15	2.13871e-14
VBICloDif104613_2781	CdifQ_04003930	3780451	3782232	1782	+	Periplasmic [Fe] hydrogenase large subunit (EC 1.12.7.2)	29140079	core	181.702	659.414	1.85961	-7.77197	7.77156e-15	9.20397e-14
VBICloDif104613_0984	CdifQ_04002124	1993381	1994460	1080	+	Chorismate synthase (EC 4.2.3.5)	29136462	core	147.93	532.573	1.84807	-7.18166	6.88782e-13	7.0314e-12
VBICloDif104613_1704	CdifQ_04002853	2656082	2656888	807	-	FIG00522932: hypothetical protein	29137912	core	11.6819	41.5903	1.83197	-3.93733	8.23918e-05	0.000332874
VBICloDif104613_2603	CdifQ_04003765	3612579	3614459	1881	-	D-proline reductase, 45 kDa subunit (EC 1.21.4.1) / D-proline reductase, 23 kDa subunit (EC 1.21.4.1)	29139721	core	1938.13	6895.77	1.83105	-7.28097	3.31513e-13	3.48232e-12
VBICloDif104613_1446	CdifQ_04002591	2418491	2418943	453	-	probable beta-D-galactosidase	29137392	core	8.75674	31.1328	1.82997	-2.99709	0.00272575	0.00804406
VBICloDif104613_0748	CdifQ_04001889	1785317	1786519	1203	+	DUF819 domain-containing protein	29135975	core	33.5027	118.933	1.8278	-5.58884	2.28593e-08	1.56601e-07
VBICloDif104613_4149	CdifQ_04001055	1045732	1046406	675	+	Spermidine Putrescine ABC transporter permease component potC (TC_3.A.1.11.1)	29134313	core	63.7195	226.035	1.82674	-5.49345	3.94157e-08	2.63061e-07
VBICloDif104613_2254	CdifQ_04003410	3244412	3245791	1380	-	FIG00774117: hypothetical protein	29139022	core	7.59528	26.9089	1.82491	-4.40626	1.05169e-05	4.96913e-05
VBICloDif104613_3140	CdifQ_04000026	30268	31434	1167	+	probable beta-1,3-exoglucanase	29132255	core	1.31127	4.60758	1.81305	-2.90074	0.00372277	0.0106315
VBICloDif104613_2331	CdifQ_04003488	3325712	3326905	1194	-	PTS system, cellobiose-specific IIC component (EC 2.7.1.69)	29139177	core	4.98221	17.4671	1.80978	-3.97075	7.1646e-05	0.000292064
VBICloDif104613_4091	CdifQ_04001000	985970	987112	1143	+	FIG00516323: hypothetical protein	29134196	core	26.4755	92.7938	1.80937	-5.21011	1.88724e-07	1.1437e-06
VBICloDif104613_0358	CdifQ_04001487	1432551	1434449	1899	+	Glutamine synthetase, clostridia type (EC 6.3.1.2)	29135179	core	310.518	1088.17	1.80916	-7.77429	7.54952e-15	8.97031e-14
VBICloDif104613_0354	CdifQ_04001483	1428342	1429121	780	-	Aspartate aminotransferase (EC 2.6.1.1)	29135171	core	898.254	3120.51	1.79659	-7.70716	1.28786e-14	1.48165e-13
VBICloDif104613_1122	CdifQ_04002264	2120192	2121067	876	-	FIG00517937: hypothetical protein	29136741	core	2.95671	10.1937	1.78561	-2.84306	0.00446829	0.0124947
VBICloDif104613_1702	CdifQ_04002851	2654017	2654931	915	-	CRISPR-associated helicase Cas3	29137908	core	7.26354	24.9943	1.78286	-3.71757	0.000201147	0.000759328
VBICloDif104613_1970	CdifQ_04003123	2923345	2924271	927	+	FIG00524814: hypothetical protein	29138448	core	3.31507	11.3668	1.77772	-3.43441	0.00059384	0.0020457
VBICloDif104613_2839	CdifQ_04003991	3847341	3847703	363	-	Programmed cell death toxin YdcE	29140201	core	317.366	1080.86	1.76796	-5.90932	3.43532e-09	2.58828e-08
VBICloDif104613_0867	CdifQ_04002007	1889907	1891193	1287	+	Glycine reductase component B beta subunit (EC 1.21.4.2) / Glycine reductase component B alpha subunit (EC 1.21.4.2)	29136218	core	3.67646	12.4719	1.76229	-3.74139	0.000183002	0.000695907
VBICloDif104613_0265	CdifQ_04001396	1345149	1345397	249	+	FIG00516385: hypothetical protein	29134990	core	4703.48	15897	1.75695	-7.29957	2.88658e-13	3.05876e-12
VBICloDif104613_3877	CdifQ_04000784	778579	779460	882	+	5,10-methylenetetrahydrofolate reductase (EC 1.5.1.20)	29133761	core	346.614	1171.41	1.75685	-7.24524	4.31655e-13	4.44408e-12
VBICloDif104613_0983	CdifQ_04002123	1992090	1993403	1314	+	5-Enolpyruvylshikimate-3-phosphate synthase (EC 2.5.1.19)	29136460	core	63.4825	212.629	1.74391	-6.13285	8.63203e-10	6.80054e-09
VBICloDif104613_0545	CdifQ_04001680	1605018	1605635	618	+	FIG00519132: hypothetical protein	29135560	unique	109.266	363.138	1.73267	-5.52321	3.32857e-08	2.23798e-07
VBICloDif104613_3885	CdifQ_04000792	787691	789619	1929	+	Acetyl-CoA synthase corrinoid activation protein	29133777	core	24.8104	82.0286	1.72518	-5.49285	3.95508e-08	2.63478e-07
VBICloDif104613_1703	CdifQ_04002852	2655024	2656055	1032	-	FIG00516337: hypothetical protein	29137910	core	5.19074	17.1378	1.72317	-3.23709	0.00120757	0.00388652
VBICloDif104613_2004	CdifQ_04003157	2961096	2961944	849	-	Inosose isomerase (EC 5.3.99.-)	29138516	core	16.8398	55.5227	1.7212	-4.28194	1.8527e-05	8.43491e-05
VBICloDif104613_1667	CdifQ_04002815	2626993	2628201	1209	-	Aspartate aminotransferase (AspB-4) (EC 2.6.1.1)	29137838	core	4.22902	13.9382	1.72065	-3.6719	0.000240752	0.000896694
VBICloDif104613_1705	CdifQ_04002854	2656904	2657917	1014	-	CRISPR-associated negative autoregulator	29137914	core	30.7024	101.123	1.71969	-4.90125	9.52275e-07	5.24475e-06
VBICloDif104613_2217	CdifQ_04003373	3203109	3203420	312	-	PTS system, cellobiose-specific IIB component (EC 2.7.1.69)	29138948	core	15.8118	51.9163	1.71518	-3.09925	0.00194008	0.00591822
VBICloDif104613_2257	CdifQ_04003413	3247111	3247998	888	-	FIG00513449: hypothetical protein	29139028	core	1.32299	4.33626	1.71265	-2.35757	0.0183949	0.0428308
VBICloDif104613_4148	CdifQ_04001054	1044791	1045627	837	+	Spermidine Putrescine ABC transporter permease component PotB (TC 3.A.1.11.1)	29134311	core	50.7266	165.707	1.70782	-5.12604	2.95898e-07	1.73798e-06
VBICloDif104613_4216	CdifQ_04001124	1103035	1103724	690	+	Phage-like element PBSX protein xkdP	29134449	core	3.42438	11.1186	1.69906	-2.97992	0.00288326	0.00847439
VBICloDif104613_3717	CdifQ_04000622	597801	603011	5211	+	FIG00514220: hypothetical protein	29133435	core	26.9944	87.6186	1.69858	-6.60771	3.90308e-11	3.50986e-10
VBICloDif104613_3935	CdifQ_04000843	839868	840203	336	+	anti-sigma F factor antagonist (spoIIAA-2); anti sigma b factor antagonist RsbV	29133881	core	162.309	526.071	1.69651	-4.7944	1.6316e-06	8.69547e-06
VBICloDif104613_3936	CdifQ_04000844	840217	840645	429	+	Anti-sigma F factor (EC 2.7.11.1)	29133883	core	168.393	544.97	1.69434	-5.32261	1.02289e-07	6.44687e-07
VBICloDif104613_2134	CdifQ_04003291	3113147	3114259	1113	+	putative amino acid racemase	29138782	core	42.2932	136.37	1.68903	-5.28442	1.26101e-07	7.83859e-07
VBICloDif104613_1907	CdifQ_04003060	2857389	2857658	270	-	ACT domain protein	29138322	core	119.902	384.121	1.67971	-4.02403	5.72116e-05	0.000238362
VBICloDif104613_3876	CdifQ_04000783	777869	778543	675	+	Zinc-finger protein	29133759	core	169.771	541.166	1.67248	-6.00881	1.86893e-09	1.44722e-08
VBICloDif104613_1461	CdifQ_04002607	2433735	2434859	1125	-	FIG00514672: hypothetical protein	29137423	core	85.9416	273.596	1.67062	-5.99301	2.05988e-09	1.58493e-08
VBICloDif104613_2779	CdifQ_04003928	3778028	3778525	498	+	NAD-reducing hydrogenase subunit HoxE (EC 1.12.1.2)	29140075	core	350.022	1107.31	1.66154	-6.25253	4.03847e-10	3.26683e-09
VBICloDif104613_2283	CdifQ_04003440	3272481	3273455	975	-	2-keto-3-deoxygluconate permease (KDG permease)	29139080	core	65.1023	205.812	1.66054	-5.46506	4.62761e-08	3.04917e-07
VBICloDif104613_2460	CdifQ_04003615	3470965	3471693	729	-	hypothetical protein	29139435	shared	8.88214	28.0485	1.65895	-3.5481	0.000388017	0.00139501
VBICloDif104613_1123	CdifQ_04002265	2121260	2121607	348	-	FIG00520048: hypothetical protein	29136743	core	18.7636	59.1656	1.65682	-3.17125	0.00151782	0.00474188
VBICloDif104613_1900	CdifQ_04003053	2851999	2852256	258	-	Cell division protein YlmG/Ycf19 (putative), YggT family	29138308	core	58.1703	182.783	1.65178	-2.83326	0.00460757	0.0127953
VBICloDif104613_1449	CdifQ_04002594	2421559	2421954	396	-	N-acetylmannosamine-6-phosphate 2-epimerase (EC 5.1.3.9)	29137398	core	31.9308	100.286	1.6511	-3.7683	0.000164366	0.000630331
VBICloDif104613_0982	CdifQ_04002122	1991599	1992090	492	+	3-dehydroquinate synthase (EC 4.2.3.4)	29136458	core	32.1231	100.475	1.64516	-3.99583	6.44669e-05	0.000265486
VBICloDif104613_2343	CdifQ_04003500	3337852	3339417	1566	-	PTS system, maltose and glucose-specific IIC component (EC 2.7.1.69) / PTS system, maltose and glucose-specific IIB component (EC 2.7.1.69)	29139201	core	1.19035	3.69463	1.63404	-2.81216	0.00492099	0.0135001
VBICloDif104613_0346	CdifQ_04001475	1421222	1422667	1446	+	Adenylosuccinate lyase (EC 4.3.2.2)	29135154	core	736.661	2285.21	1.63325	-7.05043	1.78368e-12	1.76133e-11
VBICloDif104613_3679	CdifQ_04000583	556533	557462	930	+	Glutaminase (EC 3.5.1.2)	29133358	core	113.06	349.426	1.62789	-5.86976	4.36432e-09	3.26109e-08
VBICloDif104613_2256	CdifQ_04003412	3246296	3247033	738	-	FIG00512894: hypothetical protein	29139026	core	8.67041	26.7703	1.62646	-3.42659	0.000611208	0.00209557
VBICloDif104613_3569	CdifQ_04000470	444226	445635	1410	+	Probable reactivating factor for D-ornithine aminomutase	29133135	core	1.10905	3.42227	1.62563	-2.67835	0.00739852	0.0192478
VBICloDif104613_0812	CdifQ_04001954	1843821	1845116	1296	+	sodium:alanine symporter family protein	29136106	core	223.94	686.608	1.61638	-6.67175	2.52764e-11	2.33678e-10
VBICloDif104613_3874	CdifQ_04000781	776236	776868	633	+	Formiminotetrahydrofolate cyclodeaminase (EC 4.3.1.4)	29133755	core	248.39	760.36	1.61408	-6.06147	1.34879e-09	1.05119e-08
VBICloDif104613_1173	CdifQ_04002317	2163009	2164664	1656	-	Dihydroxy-acid dehydratase (EC 4.2.1.9)	29136843	core	15.9036	48.4328	1.60663	-4.53612	5.7299e-06	2.82904e-05
VBICloDif104613_0749	CdifQ_04001890	1786576	1787556	981	+	Microsomal dipeptidase (EC 3.4.13.19)	29135977	core	22.6214	68.5261	1.59897	-4.30474	1.67179e-05	7.69831e-05
VBICloDif104613_1466	CdifQ_04002612	2437931	2439199	1269	-	Lysine 2,3-aminomutase (EC 5.4.3.2)	29137434	core	294.972	888.172	1.59026	-6.69723	2.12415e-11	1.97382e-10
VBICloDif104613_0197	CdifQ_04001325	1283849	1284289	441	-	Spermine/spermidine acetyltransferase (EC 2.3.1.57)	29134852	core	6.811	20.4961	1.58941	-2.51373	0.0119462	0.0292125
VBICloDif104613_0271	CdifQ_04001402	1348491	1349426	936	-	ABC-type multidrug transport system, ATPase component	29135002	core	9.29981	27.8449	1.58214	-3.63063	0.000282735	0.00104129
VBICloDif104613_3716	CdifQ_04000621	595780	597786	2007	+	FIG00515128: hypothetical protein	29133433	core	10.7089	32.0548	1.58174	-4.26371	2.01064e-05	9.07417e-05
VBICloDif104613_1367	CdifQ_04002509	2343085	2343810	726	-	Ferredoxin 3 fused to uncharacterized domain	29137233	core	21.7263	64.7087	1.57452	-3.85157	0.000117361	0.0004603
VBICloDif104613_0382	CdifQ_04001510	1451538	1451966	429	+	Phage tail fibers	29135228	core	29.2917	86.4755	1.5618	-3.57067	0.000356073	0.00128783
VBICloDif104613_0869	CdifQ_04002010	1891631	1892587	957	+	Glycine reductase component B gamma subunit (EC 1.21.4.2) @ selenocysteine-containing	29136223	core	6.41259	18.7526	1.54811	-3.16211	0.00156633	0.00488922
VBICloDif104613_3434	CdifQ_04000328	305958	307265	1308	+	Acetylornithine deacetylase/Succinyl-diaminopimelate desuccinylase and related deacylases	29132856	core	1.6202	4.72856	1.54523	-2.65977	0.00781947	0.0202369
VBICloDif104613_3875	CdifQ_04000782	776960	777832	873	+	Methylenetetrahydrofolate dehydrogenase (NADP+) (EC 1.5.1.5) / Methenyltetrahydrofolate cyclohydrolase (EC 3.5.4.9)	29133757	core	308.747	900.385	1.54412	-6.26228	3.79384e-10	3.08271e-09
VBICloDif104613_3984	CdifQ_04000891	883997	884407	411	+	FIG00515986: hypothetical protein	29133980	core	4431.21	12859.6	1.53708	-6.64863	2.95841e-11	2.70739e-10
VBICloDif104613_0672	CdifQ_04001810	1716143	1717093	951	+	N-acetylglucosamine kinase of eukaryotic type (EC 2.7.1.59)	29135820	core	4.1398	11.93	1.52696	-2.9789	0.00289288	0.00848891
VBICloDif104613_1445	CdifQ_04002590	2417528	2418331	804	-	FIG00516798: hypothetical protein	29137390	core	8.60992	24.7646	1.52421	-3.33239	0.000861032	0.00285488
VBICloDif104613_2282	CdifQ_04003439	3272078	3272383	306	-	Altronate hydrolase (EC 4.2.1.7)	29139078	core	200.171	574.751	1.52171	-4.1231	3.73806e-05	0.000160506
VBICloDif104613_0463	CdifQ_04001592	1530330	1531115	786	+	GCN5-related N-acetyltransferase	29135390	core	27.2586	77.8921	1.51477	-3.93126	8.45003e-05	0.000341012
VBICloDif104613_3034	CdifQ_04004187	4029134	4029979	846	+	ABC transporter, ATP-binding protein	29140598	shared	18.2056	51.7229	1.50642	-3.77072	0.000162776	0.000625556
VBICloDif104613_4059	CdifQ_04000967	951403	952290	888	-	ABC transporter permease protein	29134131	core	61.0008	172.67	1.50112	-4.71783	2.38371e-06	1.23939e-05
VBICloDif104613_2759		3756000	3756638	639	-	hypothetical protein	29140035	shared	24.7753	70.1285	1.5011	-3.71002	0.000207244	0.000780718
VBICloDif104613_2111	CdifQ_04003267	3090535	3092430	1896	-	N-acetylmuramoyl-L-alanine amidase (EC 3.5.1.28)	29138736	core	31.145	11.0046	-1.5009	4.15062	3.31582e-05	0.000144603
VBICloDif104613_3949	CdifQ_04000856	850648	852384	1737	-	Multimodular transpeptidase-transglycosylase (EC 2.4.1.129) (EC 3.4.-.-)	29133909	core	418.69	147.766	-1.50257	6.30276	2.92399e-10	2.40284e-09
VBICloDif104613_3320	CdifQ_04000209	198142	198726	585	+	Orotate phosphoribosyltransferase (EC 2.4.2.10)	29132626	core	977.94	344.381	-1.50574	5.79726	6.74082e-09	4.9351e-08
VBICloDif104613_3160	CdifQ_04000046	50004	50489	486	+	2-C-methyl-D-erythritol 2,4-cyclodiphosphate synthase (EC 4.6.1.12)	29132298	core	337.708	118.838	-1.50678	4.69235	2.70079e-06	1.39824e-05
VBICloDif104613_1192	CdifQ_04002336	2180260	2180883	624	-	FIG00516793: hypothetical protein	29136881	core	1310.92	461.233	-1.50702	6.0305	1.63453e-09	1.27115e-08
VBICloDif104613_0195	CdifQ_04001323	1282340	1283206	867	+	FIG00512787: hypothetical protein	29134848	core	49.7194	17.4776	-1.5083	3.7085	0.00020849	0.000784597
VBICloDif104613_0250	CdifQ_04001381	1330932	1331300	369	+	Signal recognition particle associated protein	29134960	core	197.971	69.4449	-1.51135	3.87967	0.000104596	0.000413818
VBICloDif104613_1695	CdifQ_04002843	2649447	2649626	180	-	SSU ribosomal protein S21p	29137894	core	26468.8	9278.17	-1.51238	3.63907	0.00027362	0.0010108
VBICloDif104613_1385	CdifQ_04002528	2360172	2361353	1182	-	ATP-dependent RNA helicase YxiN	29137270	core	51.6324	18.0861	-1.5134	4.17503	2.97944e-05	0.00013072
VBICloDif104613_1714	CdifQ_04002864	2665819	2666973	1155	-	Chaperone protein DnaJ	29137933	core	322.535	112.722	-1.51669	5.76256	8.28477e-09	5.99282e-08
VBICloDif104613_2672	CdifQ_04003836	3684670	3685956	1287	-	ATP-dependent protease La (EC 3.4.21.53) Type I	29139860	core	379.089	132.417	-1.51745	6.00916	1.8649e-09	1.4472e-08
VBICloDif104613_1885	CdifQ_04003039	2837651	2838349	699	-	5'-methylthioadenosine nucleosidase (EC 3.2.2.16) / S-adenosylhomocysteine nucleosidase (EC 3.2.2.9)	29138278	core	120.837	42.1758	-1.51857	4.3361	1.45034e-05	6.7299e-05
VBICloDif104613_4021	CdifQ_04000929	918627	919079	453	+	FIG00516716: hypothetical protein	29134054	unique	92.8334	32.3939	-1.51892	3.45769	0.000544821	0.00189849
VBICloDif104613_2078	CdifQ_04003234	3044757	3045509	753	-	Putative N-acetylgalactosaminyl-diphosphoundecaprenol glucuronosyltransferase	29138670	core	329.127	114.793	-1.51961	5.27795	1.30635e-07	8.10655e-07
VBICloDif104613_0193	CdifQ_04001321	1279614	1280426	813	+	RNA binding methyltransferase FtsJ like	29134844	core	327.184	114.021	-1.5208	5.37362	7.71711e-08	4.91508e-07
VBICloDif104613_1536	CdifQ_04002684	2505620	2506066	447	-	Ribose 5-phosphate isomerase B (EC 5.3.1.6)	29137574	core	413.635	143.921	-1.52308	4.81048	1.50568e-06	8.04804e-06
VBICloDif104613_0439	CdifQ_04001568	1507945	1508724	780	+	FIG00515967: hypothetical protein	29135342	core	136.923	47.5613	-1.5255	4.58252	4.59401e-06	2.29005e-05
VBICloDif104613_3644	CdifQ_04000549	521675	523216	1542	-	Aminobenzoyl-glutamate transport protein	29133288	core	463.189	160.796	-1.52637	6.37912	1.78108e-10	1.50606e-09
VBICloDif104613_2807	CdifQ_04003959	3816480	3817394	915	-	L-threonine 3-O-phosphate decarboxylase (EC 4.1.1.81)	29140137	core	15.2481	5.29015	-1.52725	3.02057	0.00252297	0.00753151
VBICloDif104613_0419	CdifQ_04001548	1486301	1487191	891	+	Permease of the drug/metabolite transporter (DMT) superfamily	29135302	core	63.6346	22.066	-1.52799	4.09397	4.24056e-05	0.000180798
VBICloDif104613_1324	CdifQ_04002467	2301709	2301912	204	-	FIG00512826: hypothetical protein	29137146	core	7064.88	2448.44	-1.5288	4.44992	8.59022e-06	4.11785e-05
VBICloDif104613_1484	CdifQ_04002630	2454724	2455275	552	-	FIG00513388: hypothetical protein	29137470	core	146.679	50.7923	-1.52998	4.24357	2.19989e-05	9.86683e-05
VBICloDif104613_2558	CdifQ_04003718	3572459	3573862	1404	-	Multi antimicrobial extrusion protein (Na(+)/drug antiporter), MATE family of MDR efflux pumps	29139631	core	49.3896	17.0735	-1.53245	4.34512	1.39202e-05	6.46755e-05
VBICloDif104613_1052	CdifQ_04002194	2057446	2058855	1410	+	Ethanolamine sensory transduction histidine kinase	29136600	core	76.7039	26.5155	-1.53246	4.73554	2.1847e-06	1.14247e-05
VBICloDif104613_0363	CdifQ_04001492	1438439	1438825	387	+	FIG00513623: hypothetical protein	29135189	core	193.98	67.0186	-1.53328	3.96581	7.31481e-05	0.000297518
VBICloDif104613_1773	CdifQ_04002922	2722369	2723088	720	-	FIG00518374: hypothetical protein	29138052	core	86.7751	29.9559	-1.53444	4.13854	3.49524e-05	0.000151697
VBICloDif104613_2068	CdifQ_04003224	3034620	3035576	957	+	Cell envelope-associated transcriptional attenuator LytR-CpsA-Psr, subfamily F1 (as in PMID19099556)	29138650	core	354.681	122.417	-1.53472	5.68891	1.27852e-08	9.01431e-08
VBICloDif104613_0151	CdifQ_04001278	1248520	1249716	1197	+	Acetate kinase (EC 2.7.2.1)	29134757	core	1791.3	617.758	-1.53589	6.94443	3.79985e-12	3.7218e-11
VBICloDif104613_2863	CdifQ_04004014	3863466	3864530	1065	-	Peptide chain release factor 1	29140249	core	732.286	252.19	-1.53789	6.4394	1.1995e-10	1.02766e-09
VBICloDif104613_2981	CdifQ_04004133	3973910	3974596	687	-	ABC transporter, ATPase component	29140491	core	422.851	145.61	-1.53804	5.47384	4.4038e-08	2.90699e-07
VBICloDif104613_3048	CdifQ_04004203	4040351	4040755	405	-	FIG00516894: hypothetical protein	29140626	core	746.97	257.219	-1.53805	5.22345	1.75623e-07	1.06968e-06
VBICloDif104613_4111	CdifQ_04001020	1009594	1011528	1935	+	Fe-S OXIDOREDUCTASE (1.8.-.-)	29134237	core	165.875	57.0995	-1.53855	5.77343	7.76724e-09	5.6297e-08
VBICloDif104613_1823	CdifQ_04002974	2772038	2772778	741	-	FIG00513653: hypothetical protein	29138153	core	43.8582	15.0901	-1.53925	3.678	0.00023507	0.000878242
VBICloDif104613_2709	CdifQ_04003871	3715415	3715693	279	-	FIG00524717: hypothetical protein	29139935	core	54.1598	18.6321	-1.53943	2.30297	0.0212807	0.0487184
VBICloDif104613_2118	CdifQ_04003274	3097151	3098170	1020	-	Holliday junction DNA helicase RuvB	29138750	core	88.2547	30.3575	-1.53962	4.53996	5.62643e-06	2.78174e-05
VBICloDif104613_2723	CdifQ_04003885	3727915	3728580	666	+	ABC transporter ATP-binding protein uup	29139963	core	33.6077	11.5399	-1.54217	3.40583	0.000659642	0.00224675
VBICloDif104613_4124	CdifQ_04001033	1023672	1024514	843	-	FIG00515357: hypothetical protein	29134263	core	240.912	82.6406	-1.54358	5.23722	1.63013e-07	9.94545e-07
VBICloDif104613_2715	CdifQ_04003877	3721698	3723113	1416	-	Transcriptional regulator, GntR family domain / Aspartate aminotransferase (EC 2.6.1.1)	29139947	core	26.7426	9.15457	-1.54657	3.88446	0.000102556	0.000406634
VBICloDif104613_1277	CdifQ_04002419	2257526	2257807	282	-	Possible hypoxanthine oxidase XdhD (EC 1.-.-.-)	29137051	unique	153.182	52.339	-1.54929	3.29469	0.000985318	0.00322856
VBICloDif104613_1950	CdifQ_04003103	2900045	2901142	1098	+	GTP-binding and nucleic acid-binding protein YchF	29138408	core	384.432	131.329	-1.54954	5.96943	2.38083e-09	1.82028e-08
VBICloDif104613_1787	CdifQ_04002937	2735437	2737857	2421	-	Leucyl-tRNA synthetase (EC 6.1.1.4)	29138081	core	489.719	167.235	-1.55008	6.82845	8.58336e-12	8.18581e-11
VBICloDif104613_3062	CdifQ_04004217	4052662	4053456	795	-	FIG00519863: hypothetical protein	29140654	core	21.5797	7.34436	-1.55496	3.29341	0.000989797	0.00324031
VBICloDif104613_3723	CdifQ_04000627	607981	609294	1314	+	Co-activator of prophage gene expression IbrA	29133447	core	156.405	53.1807	-1.55631	5.37439	7.68415e-08	4.90271e-07
VBICloDif104613_3907	CdifQ_04000814	809923	811986	2064	+	putative ATP-dependent DNA helicase YjcD	29133823	core	101.505	34.4772	-1.55783	5.44109	5.29545e-08	3.46697e-07
VBICloDif104613_1103	CdifQ_04002245	2102522	2103721	1200	+	Conserved protein	29136702	core	836.905	284.209	-1.55811	6.66165	2.70779e-11	2.49695e-10
VBICloDif104613_3737	CdifQ_04000641	618782	619543	762	+	chloride ion channel protein	29133475	core	104.178	35.373	-1.55832	4.40946	1.03628e-05	4.90271e-05
VBICloDif104613_0714	CdifQ_04001853	1752309	1752824	516	+	ABC-type multidrug transport system, ATPase component	29135906	core	172.058	58.3532	-1.56001	4.35963	1.30284e-05	6.08439e-05
VBICloDif104613_1829	CdifQ_04002981	2777763	2778317	555	-	Ribosomal RNA small subunit methyltransferase D (EC 2.1.1.-)	29138165	core	71.4358	24.2108	-1.56099	3.76711	0.000165147	0.000632658
VBICloDif104613_4106	CdifQ_04001015	1000627	1001133	507	+	FIG00512819: hypothetical protein	29134227	core	440.801	149.303	-1.56189	5.17628	2.26352e-07	1.34696e-06
VBICloDif104613_0817	CdifQ_04001959	1849363	1851171	1809	+	ATP-dependent DNA helicase RecQ	29136116	core	10.5915	3.58737	-1.56191	3.47904	0.000503222	0.00176713
VBICloDif104613_1788	CdifQ_04002938	2738211	2738561	351	-	Iojap protein	29138083	core	3437.73	1164.06	-1.56229	6.39431	1.61273e-10	1.37195e-09
VBICloDif104613_0721	CdifQ_04001860	1760870	1762012	1143	+	Sensor histidine kinase VanS (EC 2.7.3.-)	29135920	core	348.818	117.95	-1.5643	5.96255	2.48332e-09	1.89066e-08
VBICloDif104613_1090	CdifQ_04002232	2090627	2091271	645	-	tRNA (guanine46-N7-)-methyltransferase (EC 2.1.1.33)	29136676	core	60.2379	20.3592	-1.56499	3.78704	0.000152452	0.000587752
VBICloDif104613_4110	CdifQ_04001019	1006059	1009409	3351	+	FIG00516905: hypothetical protein	29134235	core	20.8012	7.0304	-1.56499	4.33241	1.47485e-05	6.83484e-05
VBICloDif104613_0581	CdifQ_04001715	1637028	1638236	1209	+	Tyrosyl-tRNA synthetase (EC 6.1.1.1)	29135634	core	1022.09	345.336	-1.56545	6.85139	7.31371e-12	7.01187e-11
VBICloDif104613_2389	CdifQ_04003545	3392377	3393711	1335	-	Beta-glucosidase (EC 3.2.1.21); 6-phospho-beta-glucosidase (EC 3.2.1.86)	29139293	core	29.18	9.85595	-1.56591	3.91111	9.18737e-05	0.00036709
VBICloDif104613_2798	CdifQ_04003950	3809837	3810562	726	-	Cobalt-precorrin-3b C17-methyltransferase	29140119	core	175.432	59.2441	-1.56617	4.83276	1.34651e-06	7.23997e-06
VBICloDif104613_2871	CdifQ_04004022	3870986	3871906	921	-	Oligoendopeptidase F	29140265	unique	16.7644	5.64994	-1.56909	3.2277	0.00124789	0.00400208
VBICloDif104613_2147	CdifQ_04003304	3124928	3125215	288	-	Transcriptional regulator, MarR family	29138808	core	190.521	64.1933	-1.56946	3.54338	0.00039503	0.00141882
VBICloDif104613_1280	CdifQ_04002423	2260242	2261030	789	-	Xanthine dehydrogenase, FAD binding subunit (EC 1.17.1.4)	29137057	core	51.2852	17.2398	-1.5728	3.9128	9.12338e-05	0.000364935
VBICloDif104613_3500	CdifQ_04000399	380705	381541	837	+	FIG00515235: hypothetical protein	29132995	core	59.1166	19.8159	-1.5769	4.07512	4.59897e-05	0.000194477
VBICloDif104613_2878		3876039	3876572	534	-	Spore cortex biosynthesis protein	29140279	core	23.4849	7.84938	-1.58108	3.02082	0.00252089	0.0075315
VBICloDif104613_3498	CdifQ_04000397	378899	379711	813	+	GTP pyrophosphokinase (EC 2.7.6.5)	29132991	core	862.801	287.512	-1.58541	6.45236	1.10124e-10	9.47953e-10
VBICloDif104613_2079	CdifQ_04003235	3045557	3046465	909	-	glycosyl transferase, family 2	29138672	core	237.581	78.9478	-1.58945	5.43944	5.34491e-08	3.48381e-07
VBICloDif104613_3695	CdifQ_04000599	574672	576591	1920	+	Threonyl-tRNA synthetase (EC 6.1.1.3)	29133390	core	1831.42	607.363	-1.59233	7.25374	4.05453e-13	4.21482e-12
VBICloDif104613_1858	CdifQ_04003012	2803763	2804314	552	-	Ribosomal RNA large subunit methyltransferase N (EC 2.1.1.-)	29138224	core	67.4094	22.3349	-1.59365	3.77325	0.000161132	0.000619896
VBICloDif104613_2312	CdifQ_04003469	3303895	3304731	837	-	Beta-glucoside bgl operon antiterminator, BglG family	29139138	core	244.959	80.9165	-1.59804	5.37533	7.64415e-08	4.88579e-07
VBICloDif104613_3186	CdifQ_04000075	75423	78908	3486	+	DNA-directed RNA polymerase beta' subunit (EC 2.7.7.6)	29132350	core	2186.48	721.077	-1.60038	7.14969	8.69749e-13	8.75547e-12
VBICloDif104613_1075	CdifQ_04002216	2079347	2079907	561	+	FIG00520701: hypothetical protein	29136646	core	31.5595	10.4079	-1.60039	3.31243	0.000924894	0.00304547
VBICloDif104613_1765	CdifQ_04002914	2712026	2713342	1317	-	Argininosuccinate lyase (EC 4.3.2.1)	29138036	core	79.4817	26.2015	-1.60097	4.88584	1.02987e-06	5.63786e-06
VBICloDif104613_4094	CdifQ_04001003	989684	990313	630	+	Phosphoserine phosphatase (EC 3.1.3.3)	29134202	core	16.2999	5.36478	-1.60328	2.73104	0.00631349	0.0167866
VBICloDif104613_3598	CdifQ_04000503	476552	477229	678	+	Iron-sulfur flavoprotein	29133194	core	61.6909	20.2573	-1.60662	3.87357	0.000107252	0.00042248
VBICloDif104613_2979	CdifQ_04004131	3970351	3971208	858	+	Transcriptional regulator, MerR family	29140487	core	127.405	41.7897	-1.6082	4.85055	1.23117e-06	6.65932e-06
VBICloDif104613_1809	CdifQ_04002960	2757334	2757606	273	-	Pyridine nucleotide-disulfide oxidoreductase; NADH dehydrogenase (EC 1.6.99.3)	29138125	unique	253.553	83.1183	-1.60905	3.66474	0.000247595	0.000920291
VBICloDif104613_2320	CdifQ_04003477	3313509	3314918	1410	-	FIG00588672: hypothetical protein	29139155	core	198.386	64.8236	-1.61372	5.74807	9.02657e-09	6.47768e-08
VBICloDif104613_0841	CdifQ_04001982	1867274	1868353	1080	+	Conservative hypothetical protein probably involved in hydantoin, pyrimidine utilization	29136165	core	35.1821	11.4908	-1.61436	4.02684	5.65312e-05	0.000236569
VBICloDif104613_0194	CdifQ_04001322	1280446	1282125	1680	+	DNA repair protein RecN	29134846	core	196.858	64.0907	-1.61897	5.98662	2.14251e-09	1.64502e-08
VBICloDif104613_3335	CdifQ_04000226	213145	214020	876	-	LysR family transcriptional regulator YeiE	29132657	core	73.6126	23.943	-1.62035	4.4275	9.53321e-06	4.53986e-05
VBICloDif104613_3986	CdifQ_04000893	884947	885639	693	-	GntR-family transcriptional regulator	29133984	core	207.664	67.1484	-1.62883	5.07753	3.82381e-07	2.20925e-06
VBICloDif104613_3831	CdifQ_04000738	723592	723969	378	+	Transcriptional regulator, LacI family	29133667	unique	537.801	173.845	-1.62927	5.04493	4.53695e-07	2.59336e-06
VBICloDif104613_2977	CdifQ_04004129	3968794	3969684	891	+	SAM dependent methyltransferase	29140483	core	219.222	70.8599	-1.62935	5.45623	4.86352e-08	3.1988e-07
VBICloDif104613_3113	CdifQ_04004267	4097655	4097999	345	-	Ribonuclease P protein component (EC 3.1.26.5)	29140764	core	76.3683	24.6589	-1.63086	2.83647	0.00456156	0.0126967
VBICloDif104613_1519	CdifQ_04002666	2491009	2491503	495	+	putative pilin protein	29137540	core	127.878	41.2496	-1.63232	4.23968	2.23841e-05	0.000100272
VBICloDif104613_3779	CdifQ_04000685	659175	660104	930	+	bacitracin ABC transporter, ATP-binding protein	29133561	core	32.3566	10.3931	-1.63843	3.87888	0.000104938	0.000414177
VBICloDif104613_0670	CdifQ_04001808	1714304	1714573	270	-	FIG00514249: hypothetical protein	29135816	core	23522.6	7548.76	-1.63974	7.30825	2.70672e-13	2.87659e-12
VBICloDif104613_2200	CdifQ_04003355	3184466	3185680	1215	+	FIG00515160: hypothetical protein	29138914	core	4.79871	1.53981	-1.6399	2.83201	0.00462561	0.0128355
VBICloDif104613_3781	CdifQ_04000687	661227	661928	702	+	conserved hypothetical protein (partial)	29133565	core	313.931	100.705	-1.64031	5.4913	3.98986e-08	2.65308e-07
VBICloDif104613_2574	CdifQ_04003735	3584539	3585339	801	-	FIG00519493: hypothetical protein	29139663	core	180.886	57.9429	-1.64238	5.19653	2.03041e-07	1.22027e-06
VBICloDif104613_2577	CdifQ_04003738	3587623	3587868	246	-	Small acid-soluble spore protein beta	29139669	core	164.053	52.5119	-1.64344	3.12473	0.00177968	0.005475
VBICloDif104613_2859	CdifQ_04004010	3860653	3861105	453	-	Ribose 5-phosphate isomerase B (EC 5.3.1.6)	29140241	core	613.264	195.766	-1.64737	5.56092	2.68357e-08	1.82462e-07
VBICloDif104613_2937	CdifQ_04004086	3930870	3931703	834	-	rRNA small subunit methyltransferase I	29140397	core	127.728	40.6382	-1.65217	4.94128	7.76112e-07	4.30724e-06
VBICloDif104613_1422	CdifQ_04002567	2400212	2400469	258	-	Transcriptional regulator, MarR family	29137344	core	153.281	48.7049	-1.65404	3.30293	0.000956816	0.00313801
VBICloDif104613_1419	CdifQ_04002564	2394077	2395348	1272	-	GTP-binding protein related to HflX	29137338	core	383.507	121.065	-1.66347	6.52852	6.64229e-11	5.84263e-10
VBICloDif104613_2221	CdifQ_04003377	3206311	3207423	1113	+	FIG00518604: hypothetical protein	29138956	core	19.2569	6.07486	-1.66445	3.58182	0.000341203	0.00123999
VBICloDif104613_3761	CdifQ_04000664	647060	647581	522	+	Transcriptional regulator, PadR family	29133523	core	19.1782	6.04899	-1.6647	3.02317	0.0025014	0.00747943
VBICloDif104613_0144	CdifQ_04001271	1241799	1243073	1275	+	Novel D-mannonate dehydrogenase (EC 1.1.1.57)	29134743	core	10.9972	3.46763	-1.66512	3.44989	0.00056081	0.00194672
VBICloDif104613_1208	CdifQ_04002351	2189120	2189677	558	-	Transcriptional regulator, TetR family	29136913	core	15.8919	4.98262	-1.67331	2.90796	0.0036379	0.0104302
VBICloDif104613_0508	CdifQ_04001639	1567884	1568153	270	+	hypothetical protein	29135484	core	602.21	188.514	-1.67559	4.39999	1.08256e-05	5.09555e-05
VBICloDif104613_2335	CdifQ_04003492	3329544	3330563	1020	-	Two-component sensor histidine kinase BceS	29139185	core	32.9249	10.3032	-1.67608	4.05667	4.97779e-05	0.000209762
VBICloDif104613_1287	CdifQ_04002430	2266932	2268077	1146	+	ATP-dependent RNA helicase YfmL	29137071	core	137.657	42.9475	-1.68043	5.43236	5.56122e-08	3.61181e-07
VBICloDif104613_1622	CdifQ_04002771	2585221	2586243	1023	-	Regulatory sensor-transducer, BlaR1/MecR1 family	29137747	core	58.8471	18.3348	-1.68239	4.29245	1.76712e-05	8.10529e-05
VBICloDif104613_3467	CdifQ_04000367	344310	344723	414	-	ABC transporter, ATP-binding protein	29132928	unique	121.026	37.6647	-1.68403	4.01963	5.82889e-05	0.000241969
VBICloDif104613_3580	CdifQ_04000482	457098	458036	939	+	Regulatory protein BlaR1	29133158	core	33.5767	10.4076	-1.68982	4.02603	5.67276e-05	0.000237117
VBICloDif104613_1947	CdifQ_04003100	2896019	2896765	747	-	Prolipoprotein diacylglyceryl transferase (EC 2.4.99.-)	29138402	core	53.1453	16.4726	-1.68987	4.13872	3.49243e-05	0.000151697
VBICloDif104613_1985	CdifQ_04003138	2939287	2939634	348	-	FIG00518900: hypothetical protein	29138478	core	39.9511	12.3781	-1.69044	2.8461	0.00442589	0.0123857
VBICloDif104613_3574	CdifQ_04000475	449327	449689	363	+	Conserved protein (EC 4.4.1.5)	29133146	core	703.277	217.784	-1.69119	5.35496	8.55755e-08	5.43127e-07
VBICloDif104613_1660	CdifQ_04002808	2620103	2620606	504	-	Transcriptional regulator, AraC family	29137824	core	11.253	3.48029	-1.69303	2.58559	0.00972114	0.0244819
VBICloDif104613_1535	CdifQ_04002683	2504916	2505581	666	-	Ribulose-phosphate 3-epimerase (EC 5.1.3.1)	29137572	core	162.401	50.2103	-1.69351	4.95168	7.35768e-07	4.10851e-06
VBICloDif104613_1239	CdifQ_04002379	2216776	2218113	1338	-	ABC transporter ATP-binding protein uup	29136975	core	1171.49	361.717	-1.6954	7.53341	4.95159e-14	5.50447e-13
VBICloDif104613_1082	CdifQ_04002223	2084692	2085636	945	-	Acetyl-coenzyme A carboxyl transferase alpha chain (EC 6.4.1.2)	29136660	core	1037.53	320.29	-1.6957	7.06078	1.65579e-12	1.64399e-11
VBICloDif104613_2393	CdifQ_04003549	3398298	3399617	1320	-	Arginine/ornithine antiporter ArcD	29139301	core	179.203	55.2288	-1.6981	5.92354	3.15089e-09	2.37892e-08
VBICloDif104613_2273	CdifQ_04003429	3262970	3263989	1020	-	Vitamin B12 ABC transporter, ATPase component BtuD	29139060	core	294.791	90.6658	-1.70106	6.11406	9.71268e-10	7.61878e-09
VBICloDif104613_2192	CdifQ_04003347	3175697	3176230	534	-	putative bacterioferritin	29138898	core	17.0054	5.22592	-1.70224	2.99978	0.00270179	0.00798637
VBICloDif104613_2516	CdifQ_04003673	3520797	3521540	744	-	Triosephosphate isomerase (EC 5.3.1.1)	29139547	core	1762.85	539.988	-1.70691	7.38281	1.54987e-13	1.65685e-12
VBICloDif104613_3248	CdifQ_04000139	123538	124206	669	+	Stage II sporulation protein related to metaloproteases (SpoIIQ)	29132480	core	718.249	219.245	-1.71194	6.35141	2.13349e-10	1.77742e-09
VBICloDif104613_2882	CdifQ_04004032	3877644	3879017	1374	-	possible tetrapyrrole methyltransferase domain / Nucleoside triphosphate pyrophosphohydrolase MazG (EC 3.6.1.8)	29140287	core	1976.36	603.189	-1.71217	7.77814	7.32747e-15	8.73512e-14
VBICloDif104613_3275	CdifQ_04000164	149866	150471	606	+	Substrate-specific component RibU of riboflavin ECF transporter	29132536	core	571.346	174.14	-1.71412	6.09751	1.07737e-09	8.43277e-09
VBICloDif104613_1537	CdifQ_04002685	2506255	2507016	762	-	Transketolase, C-terminal section (EC 2.2.1.1)	29137576	core	2870.55	871.045	-1.72051	7.73408	1.04361e-14	1.21609e-13
VBICloDif104613_1962	CdifQ_04003115	2915778	2916590	813	+	Oligopeptide transport system permease protein OppC (TC 3.A.1.5.1)	29138432	core	597.602	180.768	-1.72505	6.49763	8.15932e-11	7.10802e-10
VBICloDif104613_2076	CdifQ_04003232	3043435	3044124	690	-	UDP-glucose dehydrogenase (EC 1.1.1.22)	29138666	core	556.601	168.245	-1.72608	6.34428	2.23468e-10	1.85745e-09
VBICloDif104613_2986	CdifQ_04004138	3980239	3981288	1050	-	Carbamoyl-phosphate synthase small chain (EC 6.3.5.5)	29140501	core	131.234	39.6392	-1.72715	5.41411	6.1596e-08	3.97195e-07
VBICloDif104613_3688	CdifQ_04000592	567561	568409	849	+	DegV family protein	29133376	core	647.755	195.143	-1.73092	6.775	1.24405e-11	1.17714e-10
VBICloDif104613_3762	CdifQ_04000666	648014	648733	720	+	FIG00517873: hypothetical protein	29133525	core	54.3446	16.3248	-1.73507	4.22351	2.40524e-05	0.000107347
VBICloDif104613_3223	CdifQ_04000113	98516	99463	948	+	DNA-directed RNA polymerase alpha subunit (EC 2.7.7.6)	29132425	core	4618.69	1386.73	-1.7358	7.74523	9.54792e-15	1.11618e-13
VBICloDif104613_3773	CdifQ_04000678	655439	655846	408	+	FIG00515059: hypothetical protein	29133549	core	22.956	6.87102	-1.74027	2.79518	0.00518712	0.0141339
VBICloDif104613_1329	CdifQ_04002472	2306345	2307079	735	-	Undecaprenyl diphosphate synthase (EC 2.5.1.31)	29137156	core	1063.85	317.375	-1.74504	7.12718	1.02451e-12	1.02565e-11
VBICloDif104613_3864	CdifQ_04000772	763218	764918	1701	+	Arginyl-tRNA synthetase (EC 6.1.1.19)	29133735	core	728.872	217.254	-1.74628	7.62719	2.39808e-14	2.70737e-13
VBICloDif104613_3951	CdifQ_04000858	853127	853825	699	+	conserved hypothetical protein	29133913	core	15.5085	4.62143	-1.74665	3.26846	0.00108136	0.00351152
VBICloDif104613_2357	CdifQ_04003514	3352142	3352663	522	-	FIG00518140: hypothetical protein	29139229	core	1195.58	355.487	-1.74984	6.71582	1.87008e-11	1.75121e-10
VBICloDif104613_1421	CdifQ_04002566	2397898	2400144	2247	-	Lipid A export ATP-binding/permease protein MsbA	29137342	core	149.992	44.5976	-1.74985	6.53291	6.45046e-11	5.68771e-10
VBICloDif104613_0136	CdifQ_04001264	1235346	1236623	1278	+	COG0536: GTP-binding protein Obg	29134727	core	309.201	91.8821	-1.75069	6.60351	4.01528e-11	3.60182e-10
VBICloDif104613_4017	CdifQ_04000925	914574	915428	855	+	FIG00516357: hypothetical protein	29134046	core	25.0646	7.44149	-1.75199	3.66906	0.000243443	0.000905787
VBICloDif104613_2130	CdifQ_04003287	3108534	3110324	1791	-	ABC transporter, ATP-binding/permease protein	29138774	core	105.227	31.2045	-1.75368	5.90165	3.59884e-09	2.69654e-08
VBICloDif104613_2858	CdifQ_04004009	3859988	3860617	630	-	phosphoribosyltransferase	29140239	core	1441.66	424.587	-1.7636	7.26673	3.68372e-13	3.85832e-12
VBICloDif104613_3491	CdifQ_04000390	369223	370158	936	+	FIG00515250: hypothetical protein	29132977	core	4.4773	1.31493	-1.76764	2.60108	0.00929298	0.0234852
VBICloDif104613_2627	CdifQ_04003789	3637476	3638711	1236	-	FIG00514608: hypothetical protein	29139770	core	17.9313	5.26129	-1.76899	3.96438	7.35862e-05	0.000298965
VBICloDif104613_0761	CdifQ_04001902	1800555	1803029	2475	+	Glycine dehydrogenase [decarboxylating] (glycine cleavage system P1 protein) (EC 1.4.4.2)	29136003	core	39.6984	11.6263	-1.77169	5.36167	8.24563e-08	5.24248e-07
VBICloDif104613_1083	CdifQ_04002224	2085657	2085998	342	-	Acetyl-coenzyme A carboxyl transferase beta chain (EC 6.4.1.2)	29136662	core	908.091	265.51	-1.77407	5.53631	3.08918e-08	2.09256e-07
VBICloDif104613_0153	CdifQ_04001280	1250358	1250534	177	+	LSU ribosomal protein L32p	29134761	core	13052.7	3811.81	-1.7758	3.44831	0.000564101	0.00195627
VBICloDif104613_2967	CdifQ_04004118	3959839	3960336	498	-	Protein export cytoplasm protein SecA ATPase RNA helicase (TC 3.A.5.1.1)	29140463	core	3461.81	1009.87	-1.77736	7.66431	1.79856e-14	2.04968e-13
VBICloDif104613_3230	CdifQ_04000120	103772	104164	393	+	SSU ribosomal protein S9p (S16e)	29132439	core	31751.6	9260.41	-1.77768	8.02145	1.11022e-15	1.35015e-14
VBICloDif104613_1639	CdifQ_04002787	2597838	2598269	432	-	Deoxyuridine 5'-triphosphate nucleotidohydrolase (EC 3.6.1.23)	29137782	core	897.853	261.477	-1.77979	6.25093	4.0802e-10	3.28592e-09
VBICloDif104613_0567	CdifQ_04001701	1622031	1622795	765	-	FIG00512976: hypothetical protein	29135606	core	47.4223	13.7999	-1.7809	4.26534	1.99597e-05	9.01922e-05
VBICloDif104613_3050	CdifQ_04004205	4042306	4042650	345	-	Alkylphosphonate utilization operon protein PhnA	29140630	core	2498.26	723.008	-1.78884	6.84126	7.85016e-12	7.50633e-11
VBICloDif104613_0254	CdifQ_04001385	1332689	1332961	273	+	SSU ribosomal protein S16p	29134968	core	7080.66	2044.3	-1.79227	7.2536	4.05898e-13	4.21482e-12
VBICloDif104613_3414	CdifQ_04000308	288087	288461	375	+	Flagellar motor switch protein FliN	29132815	core	50.2609	14.5038	-1.793	3.3384	0.000842636	0.00280157
VBICloDif104613_3412	CdifQ_04000305	286418	286966	549	+	Flagellar basal-body rod protein FlgG	29132811	core	26.5142	7.64187	-1.79477	3.49246	0.000478587	0.00168716
VBICloDif104613_0344	CdifQ_04001473	1419089	1419913	825	-	Undecaprenyl-diphosphatase (EC 3.6.1.27)	29135150	core	187.357	53.972	-1.79551	5.64124	1.6883e-08	1.17211e-07
VBICloDif104613_3145	CdifQ_04000031	36009	36971	963	+	Acetoin dehydrogenase E1 component alpha-subunit (EC 1.2.4.-)	29132265	core	39.4936	11.3746	-1.7958	4.40423	1.06159e-05	5.00937e-05
VBICloDif104613_3268	CdifQ_04000157	140257	140931	675	+	Cytoplasmic copper homeostasis protein cutC	29132522	core	7.18153	2.06817	-1.79593	2.71224	0.00668304	0.0176018
VBICloDif104613_1539	CdifQ_04002687	2507163	2507975	813	-	Transketolase, N-terminal section (EC 2.2.1.1)	29137580	core	2933.72	843.357	-1.79852	8.10102	4.44089e-16	5.56879e-15
VBICloDif104613_3274	CdifQ_04000163	148397	149563	1167	+	amidohydrolase	29132534	core	300.919	86.4125	-1.80006	6.64578	3.01612e-11	2.75325e-10
VBICloDif104613_3241	CdifQ_04000131	114641	115987	1347	+	Phosphoglucosamine mutase (EC 5.4.2.10)	29132465	core	2092.25	600.627	-1.80051	8.15475	4.44089e-16	5.56879e-15
VBICloDif104613_2722	CdifQ_04003884	3727041	3727922	882	+	ABC transporter ATP-binding protein uup	29139961	core	4.66606	1.3372	-1.80299	2.58399	0.00976654	0.0245621
VBICloDif104613_1961	CdifQ_04003114	2914816	2915775	960	+	Oligopeptide transport system permease protein OppB (TC 3.A.1.5.1)	29138430	core	330.942	94.8233	-1.80327	6.47994	9.17615e-11	7.95559e-10
VBICloDif104613_2073	CdifQ_04003230	3040342	3042255	1914	-	UDP-N-acetylglucosamine 4,6-dehydratase (EC 4.2.1.-)	29138660	core	131.74	37.7424	-1.80344	6.37631	1.8141e-10	1.52183e-09
VBICloDif104613_1824	CdifQ_04002975	2772781	2773998	1218	-	FIG00521338: hypothetical protein	29138155	core	17.0548	4.88017	-1.80518	3.92941	8.5155e-05	0.000343272
VBICloDif104613_1774	CdifQ_04002923	2723135	2723848	714	-	FIG00512968: hypothetical protein	29138054	core	60.3372	17.2361	-1.80761	4.38706	1.14891e-05	5.40031e-05
VBICloDif104613_2100	CdifQ_04003256	3071374	3073719	2346	-	Protein export cytoplasm protein SecA ATPase RNA helicase (TC 3.A.5.1.1)	29138714	core	405.176	115.576	-1.80971	7.72195	1.15463e-14	1.34115e-13
VBICloDif104613_3229	CdifQ_04000119	103312	103743	432	+	LSU ribosomal protein L13p (L13Ae)	29132437	core	3479.03	991.743	-1.81065	7.60921	2.75335e-14	3.0988e-13
VBICloDif104613_3256	CdifQ_04000147	130145	131992	1848	+	RecD-like DNA helicase YrrC	29132497	core	31.9255	9.06951	-1.81561	4.91914	8.69264e-07	4.80949e-06
VBICloDif104613_1775	CdifQ_04002925	2724026	2724739	714	-	Maltose-6'-phosphate glucosidase (EC 3.2.1.122)	29138056	core	20.6512	5.86647	-1.81566	3.63839	0.000274351	0.00101247
VBICloDif104613_1068	CdifQ_04002209	2071207	2071728	522	+	Transcriptional regulator, MarR family	29136632	shared	749.664	212.831	-1.81653	6.50509	7.76477e-11	6.78061e-10
VBICloDif104613_2069	CdifQ_04003225	3035984	3036823	840	+	Cell envelope-associated transcriptional attenuator LytR-CpsA-Psr, subfamily F1 (as in PMID19099556)	29138652	core	2310.65	655.591	-1.81743	8.10425	4.44089e-16	5.56879e-15
VBICloDif104613_0775	CdifQ_04001917	1817673	1818257	585	+	Galactoside O-acetyltransferase (EC 2.3.1.18)	29136031	core	689.095	195.458	-1.81784	6.61473	3.72227e-11	3.3556e-10
VBICloDif104613_1782	CdifQ_04002932	2729151	2730368	1218	-	Threonine dehydratase (EC 4.3.1.19)	29138070	core	1018.95	288.81	-1.81889	7.8865	3.10862e-15	3.73035e-14
VBICloDif104613_0795	CdifQ_04001936	1831239	1831868	630	-	Transcriptional regulator, TetR family	29136071	core	12.8723	3.63751	-1.82324	2.81393	0.00489405	0.0134565
VBICloDif104613_3948	CdifQ_04000855	850220	850684	465	-	Multimodular transpeptidase-transglycosylase (EC 2.4.1.129) (EC 3.4.-.-)	29133907	unique	996.428	279.964	-1.83152	6.65429	2.84666e-11	2.61172e-10
VBICloDif104613_2452	CdifQ_04003609	3462722	3463138	417	-	FIG00517935: hypothetical protein	29139419	core	28.2304	7.92768	-1.83228	3.23189	0.00122975	0.00394738
VBICloDif104613_2174	CdifQ_04003330	3155742	3157652	1911	-	2-aminoethylphosphonate:pyruvate aminotransferase (EC 2.6.1.37)	29138862	core	253.034	71.0425	-1.83258	7.16889	7.56062e-13	7.65354e-12
VBICloDif104613_2010	CdifQ_04003163	2967550	2968494	945	-	UTP--glucose-1-phosphate uridylyltransferase (EC 2.7.7.9)	29138528	core	654.119	183.453	-1.83414	7.28226	3.28182e-13	3.45736e-12
VBICloDif104613_2074	CdifQ_04003231	3042339	3043316	978	-	putative capsular polysaccharide biosynthesis glycosyl transferase	29138662	core	441.845	123.768	-1.8359	6.92961	4.21996e-12	4.12214e-11
VBICloDif104613_2146	CdifQ_04003303	3123889	3124926	1038	-	2,4-dienoyl-CoA reductase [NADPH] (EC 1.3.1.34)	29138806	core	95.9646	26.8684	-1.83659	5.4	6.66391e-08	4.28192e-07
VBICloDif104613_0794	CdifQ_04001935	1830860	1831264	405	-	uncharacterized conserved protein	29136069	core	24.8636	6.92146	-1.84489	2.76409	0.00570824	0.0153918
VBICloDif104613_3185	CdifQ_04000074	71665	75381	3717	+	DNA-directed RNA polymerase beta subunit (EC 2.7.7.6)	29132348	core	1945.39	540.514	-1.84765	8.31973	0	0
VBICloDif104613_0437	CdifQ_04001566	1505462	1506361	900	-	D-alanine--D-alanine ligase (EC 6.3.2.4)	29135338	core	25.8283	7.1626	-1.8504	4.1082	3.98761e-05	0.000170414
VBICloDif104613_1216	CdifQ_04002357	2196289	2196867	579	-	SAM-dependent methyltransferase, MraW methylase family (EC 2.1.1.-)	29136929	core	297.186	82.2109	-1.85396	5.82476	5.71931e-09	4.20421e-08
VBICloDif104613_3190	CdifQ_04000079	82417	83610	1194	+	Translation elongation factor Tu	29132358	core	19844.3	5480.68	-1.8563	7.75383	8.88178e-15	1.04505e-13
VBICloDif104613_3244	CdifQ_04000134	118538	119833	1296	+	Rhodanese-related sulfurtransferase	29132472	core	37.7235	10.4168	-1.85655	4.77147	1.82883e-06	9.68961e-06
VBICloDif104613_2077	CdifQ_04003233	3044204	3044731	528	-	UDP-glucose dehydrogenase (EC 1.1.1.22)	29138668	core	304.093	83.9538	-1.85684	5.67919	1.35337e-08	9.50505e-08
VBICloDif104613_2470	CdifQ_04003626	3479907	3480242	336	-	FIG00520034: hypothetical protein	29139455	shared	189.461	52.2504	-1.85839	4.42133	9.80945e-06	4.65917e-05
VBICloDif104613_3176	CdifQ_04000065	65233	66426	1194	+	Translation elongation factor Tu	29132330	core	19916.7	5489.78	-1.85916	7.76389	8.21565e-15	9.69821e-14
VBICloDif104613_0139	CdifQ_04001267	1238750	1239316	567	-	putative integrase/recombinase	29134733	core	12.8235	3.52404	-1.86348	3.08938	0.00200571	0.00610303
VBICloDif104613_2064	CdifQ_04003220	3032087	3032731	645	-	Undecaprenyl diphosphate synthase (EC 2.5.1.31)	29138642	core	34.6898	9.53099	-1.86381	3.98928	6.62734e-05	0.000272616
VBICloDif104613_2716	CdifQ_04003878	3723228	3723896	669	+	FIG00517274: hypothetical protein	29139949	core	18.7062	5.11766	-1.86996	3.38601	0.000709171	0.0024019
VBICloDif104613_0252	CdifQ_04001383	1331493	1332338	846	+	Signal recognition particle, subunit Ffh SRP54 (TC 3.A.5.1.1)	29134964	core	2120.89	580.11	-1.87027	8.28107	2.22045e-16	2.8136e-15
VBICloDif104613_0650	CdifQ_04001787	1701602	1702123	522	-	FIG00514025: hypothetical protein	29135774	core	71.6015	19.5547	-1.87248	4.01886	5.84805e-05	0.000242487
VBICloDif104613_3409	CdifQ_04000302	284991	285413	423	+	FIG00515019: hypothetical protein	29132805	core	33.7435	9.21359	-1.87277	3.25871	0.00111918	0.00361812
VBICloDif104613_3464	CdifQ_04000364	342497	343060	564	-	FIG00522896: hypothetical protein	29132922	core	142.046	38.7766	-1.8731	5.05617	4.27764e-07	2.449e-06
VBICloDif104613_3200	CdifQ_04000089	88808	89011	204	+	LSU ribosomal protein L29p (L35e)	29132378	core	351.736	95.9371	-1.87433	2.8638	0.00418591	0.0118236
VBICloDif104613_0066	CdifQ_04001193	1172018	1173718	1701	+	ABC transporter, ATP-binding protein/permease protein	29134580	core	408.881	111.278	-1.87751	7.66014	1.86517e-14	2.11893e-13
VBICloDif104613_3247	CdifQ_04000138	122408	123472	1065	+	Stage II sporulation protein D (SpoIID)	29132478	core	278.048	75.2574	-1.88543	6.64032	3.13005e-11	2.84293e-10
VBICloDif104613_3576	CdifQ_04000477	451402	453516	2115	+	ATP-dependent DNA helicase rep (EC 3.6.1.-)	29133150	core	62.4925	16.8524	-1.89073	5.94413	2.77923e-09	2.11151e-08
VBICloDif104613_3404	CdifQ_04000297	278496	280310	1815	+	Flagellar biosynthesis protein FliR / Flagellar biosynthesis protein FlhB	29132795	core	28.1815	7.5936	-1.89189	4.94326	7.68273e-07	4.27028e-06
VBICloDif104613_1308	CdifQ_04002450	2286702	2287595	894	+	Homoserine kinase (EC 2.7.1.39)	29137113	core	116.049	31.2337	-1.89356	5.54291	2.97493e-08	2.01894e-07
VBICloDif104613_2021	CdifQ_04003176	2986405	2987103	699	-	probable polysaccharide deacetylase	29138556	core	178.531	47.9372	-1.89695	5.50407	3.71114e-08	2.4814e-07
VBICloDif104613_1613	CdifQ_04002763	2578412	2578831	420	-	conserved hypothetical protein	29137729	core	17.6281	4.72209	-1.90038	2.91825	0.00352004	0.0101323
VBICloDif104613_1876	CdifQ_04003030	2824857	2825636	780	-	Peptidoglycan N-acetylglucosamine deacetylase (EC 3.5.1.-)	29138260	core	23.3597	6.25734	-1.9004	3.92219	8.77463e-05	0.000352151
VBICloDif104613_4153	CdifQ_04001059	1050453	1051709	1257	+	Dolichol-phosphate mannosyltransferase (EC 2.4.1.83) in lipid-linked oligosaccharide synthesis cluster	29134321	core	46.7255	12.5127	-1.90081	5.07872	3.79976e-07	2.19974e-06
VBICloDif104613_0762	CdifQ_04001903	1803029	1804486	1458	+	Glycine dehydrogenase [decarboxylating] (glycine cleavage system P2 protein) (EC 1.4.4.2)	29136005	core	187.634	50.1579	-1.90337	6.74477	1.53266e-11	1.44269e-10
VBICloDif104613_1717	CdifQ_04002867	2669524	2669760	237	-	Heat shock protein GrpE	29137939	unique	50.635	13.5214	-1.90489	2.33515	0.0195355	0.0451797
VBICloDif104613_2396	CdifQ_04003552	3403623	3404114	492	-	PTS system, glucose-specific IIA component (EC 2.7.1.69)	29139307	core	917.922	244.622	-1.90782	6.90793	4.91762e-12	4.77787e-11
VBICloDif104613_1748	CdifQ_04002898	2695122	2696384	1263	-	PTS system, fructose-specific IIBC component (EC 2.7.1.69)	29138002	core	30.7731	8.19603	-1.90867	4.71932	2.36629e-06	1.23387e-05
VBICloDif104613_0255	CdifQ_04001386	1333026	1333253	228	+	KH domain RNA binding protein YlqC	29134970	core	1208.13	321.633	-1.90929	4.91686	8.79456e-07	4.85846e-06
VBICloDif104613_4011	CdifQ_04000919	909730	910224	495	+	Putative acetyltransferase	29134034	core	263.538	70.1156	-1.9102	5.48491	4.13679e-08	2.74574e-07
VBICloDif104613_2131	CdifQ_04003288	3110324	3112051	1728	-	Lipid A export ATP-binding/permease protein MsbA	29138776	core	63.3847	16.8442	-1.91188	5.77684	7.61148e-09	5.52786e-08
VBICloDif104613_2116	CdifQ_04003272	3095311	3095796	486	-	FIG00516124: hypothetical protein	29138746	core	372.722	98.9662	-1.91309	5.85432	4.78953e-09	3.54954e-08
VBICloDif104613_0770	CdifQ_04001912	1813508	1814059	552	-	Transcriptional regulator	29136021	core	188.621	49.9427	-1.91715	5.42183	5.89929e-08	3.81768e-07
VBICloDif104613_2020	CdifQ_04003175	2985338	2986402	1065	-	FIG00513990: hypothetical protein	29138554	core	118.487	31.3568	-1.91788	5.72355	1.04322e-08	7.42758e-08
VBICloDif104613_3466	CdifQ_04000366	343801	344313	513	-	ABC transporter, ATP-binding protein	29132926	unique	173.037	45.7817	-1.91824	5.17163	2.32058e-07	1.37865e-06
VBICloDif104613_0253	CdifQ_04001384	1332325	1332651	327	+	Signal recognition particle, subunit Ffh SRP54 (TC 3.A.5.1.1)	29134966	unique	1028.26	271.732	-1.91994	6.18806	6.09093e-10	4.87274e-09
VBICloDif104613_2880	CdifQ_04004029	3876889	3877131	243	-	S4-domain-containing heat shock protein	29140283	core	374.952	99.0431	-1.92058	4.13329	3.576e-05	0.000154463
VBICloDif104613_2115	CdifQ_04003271	3094111	3095232	1122	-	tRNA-guanine transglycosylase (EC 2.4.2.29)	29138744	core	408.631	107.64	-1.92458	7.31926	2.49356e-13	2.65784e-12
VBICloDif104613_1087	CdifQ_04002228	2087902	2088354	453	-	Biotin carboxyl carrier protein of acetyl-CoA carboxylase	29136670	core	2041.75	537.553	-1.92532	7.51844	5.55112e-14	6.13331e-13
VBICloDif104613_3786	CdifQ_04000692	667816	669006	1191	+	FIG00513927: hypothetical protein	29133575	core	45.5422	11.9164	-1.93426	5.07981	3.77816e-07	2.19424e-06
VBICloDif104613_1343	CdifQ_04002486	2319686	2320945	1260	-	Vancomycin B-type resistance protein VanW	29137184	core	693.318	181.236	-1.93565	8.02816	8.88178e-16	1.0911e-14
VBICloDif104613_1278	CdifQ_04002421	2258038	2259789	1752	-	Possible hypoxanthine oxidase XdhD (EC 1.-.-.-)	29137053	core	268.784	70.2599	-1.93567	7.46455	8.34888e-14	9.14089e-13
VBICloDif104613_2431	CdifQ_04003589	3442490	3443332	843	-	Beta-glucoside bgl operon antiterminator, BglG family	29139377	core	3.64503	0.95164	-1.93744	2.41463	0.015751	0.0373816
VBICloDif104613_3633	CdifQ_04000538	509057	509818	762	+	FIG00513732: hypothetical protein	29133266	core	225.049	58.7476	-1.93764	6.1395	8.27834e-10	6.5361e-09
VBICloDif104613_1694	CdifQ_04002842	2648974	2649417	444	-	Transamidase GatB domain protein	29137892	core	38912.1	10118.8	-1.94318	8.62856	0	0
VBICloDif104613_3213	CdifQ_04000102	93446	94714	1269	+	Preprotein translocase secY subunit (TC 3.A.5.1.1)	29132404	core	1582.49	411.309	-1.9439	8.56755	0	0
VBICloDif104613_3161	CdifQ_04000048	50856	52571	1716	+	Prolyl-tRNA synthetase (EC 6.1.1.15)	29132300	core	923.745	239.965	-1.94467	8.61195	0	0
VBICloDif104613_2133	CdifQ_04003290	3112557	3112841	285	-	Dihydrofolate reductase (EC 1.5.1.3)	29138780	shared	355.045	92.1425	-1.94607	4.69169	2.70964e-06	1.40082e-05
VBICloDif104613_3469	CdifQ_04000370	345805	346506	702	-	Phosphate regulon transcriptional regulatory protein PhoB (SphR)	29132932	core	121.367	31.3573	-1.95251	5.41878	6.0007e-08	3.87639e-07
VBICloDif104613_3745	CdifQ_04000649	629957	630538	582	-	FIG00518784: hypothetical protein	29133491	core	61.3169	15.7757	-1.95858	4.15433	3.26247e-05	0.000142448
VBICloDif104613_2471	CdifQ_04003627	3480489	3480935	447	-	hypothetical protein	29139457	shared	14.5716	3.74877	-1.95867	2.78163	0.00540869	0.0146825
VBICloDif104613_2974	CdifQ_04004124	3964952	3966106	1155	-	Methionine gamma-lyase (EC 4.4.1.11)	29140477	core	41.5001	10.653	-1.96186	4.99012	6.03416e-07	3.39036e-06
VBICloDif104613_2297	CdifQ_04003454	3290090	3290557	468	-	FIG00512805: hypothetical protein	29139108	core	5527.49	1418.75	-1.96201	8.7273	0	0
VBICloDif104613_1730	CdifQ_04002880	2681908	2682174	267	+	SSU ribosomal protein S20p	29137965	core	4345.82	1110.06	-1.96899	7.22955	4.84501e-13	4.97403e-12
VBICloDif104613_3499	CdifQ_04000398	379821	380513	693	+	Phosphohydrolase	29132993	core	83.6122	21.2698	-1.97491	5.0773	3.82839e-07	2.20925e-06
VBICloDif104613_2849	CdifQ_04004001	3855209	3855754	546	-	ATP synthase delta chain (EC 3.6.3.14)	29140221	core	122.062	31.0425	-1.9753	5.11412	3.15205e-07	1.8454e-06
VBICloDif104613_2660	CdifQ_04003824	3672325	3673362	1038	-	FIG00517022: hypothetical protein	29139836	core	164.716	41.7974	-1.97849	6.31266	2.74282e-10	2.25909e-09
VBICloDif104613_1641	CdifQ_04002789	2599750	2600610	861	+	DNA topoisomerase III (EC 5.99.1.2)	29137786	unique	38.4829	9.68487	-1.99041	4.61196	3.9888e-06	2.0077e-05
VBICloDif104613_1071	CdifQ_04002212	2074887	2076089	1203	+	Putative aminotransferase	29136638	shared	10.2673	2.57519	-1.99531	3.88014	0.000104397	0.000413481
VBICloDif104613_3224	CdifQ_04000114	99484	99825	342	+	LSU ribosomal protein L17p	29132427	core	24832.2	6201.23	-2.00158	9.13355	0	0
VBICloDif104613_2975	CdifQ_04004125	3966665	3967150	486	-	Resolvase, N-terminal	29140479	core	469.533	117.116	-2.00329	6.38032	1.76723e-10	1.49987e-09
VBICloDif104613_3273	CdifQ_04000162	146108	148249	2142	+	Transcription accessory protein (S1 RNA-binding domain)	29132532	core	145.668	36.3282	-2.00352	7.24827	4.22107e-13	4.37061e-12
VBICloDif104613_2883	CdifQ_04004033	3879124	3880737	1614	-	FIG006789: Stage V sporulation protein	29140289	core	526.454	131.233	-2.00417	8.29691	0	0
VBICloDif104613_2613	CdifQ_04003775	3622154	3622399	246	+	no significant homology.	29139741	core	4720.67	1171.12	-2.01111	7.09591	1.28497e-12	1.27932e-11
VBICloDif104613_2106	CdifQ_04003262	3082323	3084827	2505	-	FIG00516487: hypothetical protein	29138726	core	295.421	73.1932	-2.01299	8.00285	1.11022e-15	1.35015e-14
VBICloDif104613_3391	CdifQ_04000283	269571	270302	732	+	Flagellar assembly protein FliH	29132769	core	14.4755	3.5831	-2.01433	3.51076	0.000446823	0.00158598
VBICloDif104613_1946	CdifQ_04003099	2895054	2895989	936	-	rRNA small subunit methyltransferase H	29138400	core	180.87	44.5013	-2.02303	6.4327	1.25361e-10	1.07148e-09
VBICloDif104613_2298	CdifQ_04003455	3290662	3291594	933	-	FIG00516459: hypothetical protein	29139110	core	930.171	228.263	-2.0268	8.28294	2.22045e-16	2.8136e-15
VBICloDif104613_2113	CdifQ_04003269	3093264	3093626	363	-	FIG00514125: hypothetical protein	29138740	core	65.3588	15.9892	-2.03129	3.88789	0.00010112	0.00040182
VBICloDif104613_0003	CdifQ_04000003	1971	3242	1272	+	Seryl-tRNA synthetase (EC 6.1.1.11)	29132191	core	690.217	168.507	-2.03424	8.40342	0	0
VBICloDif104613_3231	CdifQ_04000121	104671	105375	705	+	N-acetylmuramoyl-L-alanine amidase (EC 3.5.1.28)	29132441	core	141.297	34.4877	-2.03457	5.77863	7.53099e-09	5.48039e-08
VBICloDif104613_2114	CdifQ_04003270	3093684	3093977	294	-	Preprotein translocase subunit YajC (TC 3.A.5.1.1)	29138742	core	23591.6	5750.33	-2.03655	9.18498	0	0
VBICloDif104613_1753	CdifQ_04002903	2700766	2701710	945	+	Mannose-6-phosphate isomerase (EC 5.3.1.8)	29138012	core	276.227	67.2332	-2.03861	6.85321	7.22133e-12	6.94168e-11
VBICloDif104613_1640	CdifQ_04002788	2598389	2599729	1341	+	DNA topoisomerase III (EC 5.99.1.2)	29137784	core	27.8582	6.72359	-2.0508	4.89939	9.61368e-07	5.2868e-06
VBICloDif104613_3407	CdifQ_04000300	283382	284260	879	+	Flagellar synthesis regulator FleN	29132801	core	57.2762	13.8202	-2.05116	5.18824	2.12292e-07	1.26955e-06
VBICloDif104613_2744	CdifQ_04003905	3744232	3745215	984	+	Ribosomal RNA large subunit methyltransferase N (EC 2.1.1.-)	29140005	shared	6181.93	1490.07	-2.05267	9.35348	0	0
VBICloDif104613_0135	CdifQ_04001263	1234945	1235235	291	+	LSU ribosomal protein L27p	29134725	core	84231.3	20282.5	-2.05412	9.21226	0	0
VBICloDif104613_1958	CdifQ_04003111	2910981	2911952	972	-	Oligopeptide transport ATP-binding protein OppF (TC 3.A.1.5.1)	29138424	core	1277.56	307.134	-2.05644	8.74904	0	0
VBICloDif104613_2296	CdifQ_04003453	3288992	3289846	855	+	sugar transporter	29139106	core	8.81585	2.11414	-2.06003	3.38654	0.000707808	0.00239953
VBICloDif104613_0049	CdifQ_04001176	1157639	1158961	1323	-	Stage V sporulation protein B	29134546	core	4.57647	1.09462	-2.06381	3.07558	0.00210093	0.0063607
VBICloDif104613_3328	CdifQ_04000217	205216	206844	1629	+	Heat shock protein 60 family chaperone GroEL	29132643	core	1398.81	334.388	-2.06461	9.30521	0	0
VBICloDif104613_0259	CdifQ_04001390	1335436	1336332	897	+	50S ribosomal subunit maturation GTPase RbgA (B. subtilis YlqF)	29134978	core	567.382	135.475	-2.0663	7.83118	4.88498e-15	5.84263e-14
VBICloDif104613_1302	CdifQ_04002444	2281249	2283072	1824	+	GTP-binding protein TypA/BipA	29137101	core	297.286	70.9455	-2.06707	8.06612	6.66134e-16	8.23914e-15
VBICloDif104613_1180	CdifQ_04002324	2169351	2170358	1008	+	FIG00524232: hypothetical protein	29136857	core	11.3997	2.69197	-2.08226	3.95205	7.74852e-05	0.000314101
VBICloDif104613_3187	CdifQ_04000076	79194	79619	426	+	SSU ribosomal protein S12p (S23e)	29132352	core	11813.5	2784.38	-2.08501	9.46201	0	0
VBICloDif104613_0842	CdifQ_04001983	1868374	1869918	1545	+	N-methylhydantoinase (ATP-hydrolyzing) (EC 3.5.2.14)	29136167	core	93.3779	21.9879	-2.08637	6.53793	6.23779e-11	5.5136e-10
VBICloDif104613_3143	CdifQ_04000029	35017	35763	747	+	Sorbitol operon transcription regulator	29132261	core	34.6777	8.15187	-2.0888	4.56844	4.91365e-06	2.44603e-05
VBICloDif104613_3220	CdifQ_04000110	97384	97782	399	+	SSU ribosomal protein S11p (S14e)	29132418	core	19381.4	4554.32	-2.08936	9.52387	0	0
VBICloDif104613_2846	CdifQ_04003998	3851377	3852771	1395	-	ATP synthase beta chain (EC 3.6.3.14)	29140215	core	3192.58	749.485	-2.09075	9.52815	0	0
VBICloDif104613_3327	CdifQ_04000216	204899	205183	285	+	Heat shock protein 60 family co-chaperone GroES	29132641	core	2910.04	680.725	-2.09589	7.45125	9.23706e-14	1.00829e-12
VBICloDif104613_0326	CdifQ_04001456	1399167	1399424	258	+	SSU ribosomal protein S15p (S13e)	29135114	core	19529.5	4530.81	-2.10782	9.17142	0	0
VBICloDif104613_1633	CdifQ_04002781	2593941	2594801	861	-	tRNA(Cytosine32)-2-thiocytidine synthetase	29137769	core	182.09	42.1244	-2.11192	6.5399	6.15596e-11	5.45458e-10
VBICloDif104613_2875	CdifQ_04004025	3874717	3875517	801	-	Exopolyphosphatase (EC 3.6.1.11)	29140273	core	58.4791	13.484	-2.11668	5.19186	2.08206e-07	1.24717e-06
VBICloDif104613_2430	CdifQ_04003588	3440417	3442345	1929	-	PTS system, beta-glucoside-specific IIB component (EC 2.7.1.69) / PTS system, beta-glucoside-specific IIC component (EC 2.7.1.69) / PTS system, beta-glucoside-specific IIA component (EC 2.7.1.69)	29139375	core	47.8076	11.0225	-2.11679	6.13202	8.67697e-10	6.82111e-09
VBICloDif104613_3386	CdifQ_04000278	265864	266181	318	+	Flagellar basal-body rod protein FlgB	29132759	core	147.897	34.0827	-2.11748	4.55522	5.23314e-06	2.59438e-05
VBICloDif104613_3398	CdifQ_04000290	275188	276006	819	+	Flagellar motor rotation protein MotA	29132783	core	54.9057	12.6405	-2.11891	5.15535	2.53155e-07	1.49663e-06
VBICloDif104613_3408	CdifQ_04000301	284274	284975	702	+	RNA polymerase sigma factor for flagellar operon	29132803	core	5.95914	1.36782	-2.12322	2.74501	0.00605094	0.0161954
VBICloDif104613_3892	CdifQ_04000799	793996	794775	780	+	Histidinol-phosphatase (EC 3.1.3.15)	29133791	core	454.669	104.096	-2.1269	7.55475	4.19664e-14	4.67958e-13
VBICloDif104613_2117	CdifQ_04003273	3095808	3096833	1026	-	S-adenosylmethionine:tRNA ribosyltransferase-isomerase (EC 5.-.-.-)	29138748	core	367.058	84.0113	-2.12735	7.70393	1.31006e-14	1.50243e-13
VBICloDif104613_2445	CdifQ_04003603	3456989	3458683	1695	-	Ferric iron ABC transporter, permease protein	29139405	shared	87.2898	19.9583	-2.12882	6.6985	2.10574e-11	1.96175e-10
VBICloDif104613_3399	CdifQ_04000291	275996	276691	696	+	Flagellar motor rotation protein MotB	29132785	core	24.7782	5.64986	-2.13279	4.24884	2.14879e-05	9.66154e-05
VBICloDif104613_1070	CdifQ_04002211	2073317	2074855	1539	+	Aminobenzoyl-glutamate transport protein	29136636	shared	12.0809	2.74708	-2.13675	4.51935	6.20301e-06	3.04191e-05
VBICloDif104613_3219	CdifQ_04000109	96977	97348	372	+	SSU ribosomal protein S13p (S18e)	29132416	core	3799.69	860.326	-2.14293	8.3905	0	0
VBICloDif104613_3402	CdifQ_04000294	277537	278202	666	+	Flagellar biosynthesis protein FliP	29132791	core	103.923	23.4584	-2.14734	5.63119	1.78975e-08	1.23544e-07
VBICloDif104613_3392	CdifQ_04000284	270306	271625	1320	+	Flagellum-specific ATP synthase FliI	29132771	core	82.4394	18.4817	-2.15724	6.37708	1.80499e-10	1.5177e-09
VBICloDif104613_2429	CdifQ_04003587	3438929	3440356	1428	-	Beta-glucosidase (EC 3.2.1.21); 6-phospho-beta-glucosidase (EC 3.2.1.86)	29139373	core	50.3351	11.2688	-2.15923	5.90154	3.60134e-09	2.69654e-08
VBICloDif104613_3411	CdifQ_04000304	285624	286397	774	+	Flagellar basal-body rod protein FlgF	29132809	core	44.2785	9.89007	-2.16255	4.99991	5.7357e-07	3.22766e-06
VBICloDif104613_3189	CdifQ_04000078	80261	82312	2052	+	Translation elongation factor G	29132356	core	4733.32	1049.74	-2.17283	9.72263	0	0
VBICloDif104613_3267	CdifQ_04000156	139202	140254	1053	+	Acetylornithine deacetylase/Succinyl-diaminopimelate desuccinylase and related deacylases	29132520	core	21.6781	4.80329	-2.17414	4.69648	2.64688e-06	1.37229e-05
VBICloDif104613_1279	CdifQ_04002422	2259793	2260242	450	-	Carbon monoxide dehydrogenase small chain (EC 1.2.99.2)	29137055	core	121.801	26.7642	-2.18615	5.2177	1.81162e-07	1.09972e-06
VBICloDif104613_3011	CdifQ_04004162	4005413	4006507	1095	-	Probable cation efflux pump, multidrug resistance protein (FS)	29140552	core	98.0497	21.5321	-2.18702	6.37861	1.78699e-10	1.50606e-09
VBICloDif104613_2955	CdifQ_04004106	3951599	3952405	807	-	Glutamate racemase (EC 5.1.1.3)	29140439	core	388.584	85.3248	-2.18719	7.57288	3.64153e-14	4.07312e-13
VBICloDif104613_2514	CdifQ_04003671	3517895	3518668	774	-	Enolase (EC 4.2.1.11)	29139543	core	5049.29	1107.68	-2.18854	9.96591	0	0
VBICloDif104613_3608	CdifQ_04000514	483181	483873	693	+	Two-component response regulator	29133215	core	175.315	38.4474	-2.18899	6.37864	1.7867e-10	1.50606e-09
VBICloDif104613_1826	CdifQ_04002977	2774473	2776392	1920	-	FIG00517988: hypothetical protein	29138159	core	10.6944	2.34252	-2.19073	4.62247	3.79193e-06	1.92195e-05
VBICloDif104613_2861	CdifQ_04004012	3861588	3862628	1041	-	COG0009 Sua5 subfamily, required for N6-threonylcarbamoyl adenosine t(6)A37 modification in tRNA	29140245	core	238.409	52.1646	-2.19229	7.41134	1.25011e-13	1.35641e-12
VBICloDif104613_1715	CdifQ_04002865	2667184	2669031	1848	-	Chaperone protein DnaK	29137935	core	2403.68	523.896	-2.19789	10.0042	0	0
VBICloDif104613_3215	CdifQ_04000105	95657	96127	471	+	Methionine aminopeptidase (EC 3.4.11.18)	29132408	core	6967.66	1516.12	-2.20029	9.86576	0	0
VBICloDif104613_2866	CdifQ_04004017	3866478	3866678	201	-	LSU ribosomal protein L31p	29140255	core	51171.9	11123.8	-2.2017	8.35148	0	0
VBICloDif104613_1242	CdifQ_04002382	2220391	2220864	474	-	Molybdopterin-guanine dinucleotide biosynthesis protein MobA	29136981	core	14.2975	3.09036	-2.20992	3.17979	0.00147381	0.00462032
VBICloDif104613_2912	CdifQ_04004061	3910382	3910912	531	-	Ribonuclease M5 (EC 3.1.26.8)	29140347	core	231.146	49.9357	-2.21066	6.29959	2.98425e-10	2.44682e-09
VBICloDif104613_0663	CdifQ_04001800	1709873	1710577	705	+	Homoserine dehydrogenase (EC 1.1.1.3)	29135801	unique	9.8929	2.13677	-2.21096	3.43073	0.000601949	0.00206774
VBICloDif104613_3400	CdifQ_04000292	276703	277146	444	+	Flagellar biosynthesis protein FliL	29132787	core	11.8697	2.5633	-2.21122	2.68199	0.00731851	0.0190534
VBICloDif104613_3468	CdifQ_04000369	344880	345803	924	-	two-component sensor histidine kinase	29132930	core	62.812	13.5583	-2.21186	5.6607	1.50758e-08	1.05254e-07
VBICloDif104613_3604	CdifQ_04000509	480114	480626	513	+	FIG00516269: hypothetical protein	29133207	core	23.6032	5.05395	-2.2235	3.73547	0.000187366	0.000710267
VBICloDif104613_2515	CdifQ_04003672	3519256	3520785	1530	-	2,3-bisphosphoglycerate-independent phosphoglycerate mutase (EC 5.4.2.1)	29139545	core	1182.1	251.974	-2.23	9.86601	0	0
VBICloDif104613_3413	CdifQ_04000307	287203	288084	882	+	Flagellar motor switch protein FliM	29132813	core	6.78454	1.44539	-2.23079	3.42948	0.000604746	0.00207538
VBICloDif104613_2451	CdifQ_04003608	3462509	3462709	201	-	Transcriptional regulator, Cro/CI family	29139417	core	410.091	87.1868	-2.23376	2.64995	0.00805044	0.020706
VBICloDif104613_1371	CdifQ_04002513	2346706	2347455	750	-	ABC-type polar amino acid transport system, ATPase component	29137241	core	345.318	73.3253	-2.23554	7.40804	1.2812e-13	1.38599e-12
VBICloDif104613_0257	CdifQ_04001388	1333885	1334580	696	+	tRNA (Guanine37-N1) -methyltransferase (EC 2.1.1.31)	29134974	core	248.787	52.7636	-2.23729	6.92192	4.45555e-12	4.34057e-11
VBICloDif104613_3863	CdifQ_04000771	762394	762807	414	+	FIG00517001: hypothetical protein	29133733	core	415.801	87.9106	-2.24179	6.56469	5.2143e-11	4.65434e-10
VBICloDif104613_2985	CdifQ_04004137	3976840	3980046	3207	-	Carbamoyl-phosphate synthase large chain (EC 6.3.5.5)	29140499	core	264.594	55.9196	-2.24236	9.23426	0	0
VBICloDif104613_1217	CdifQ_04002358	2196925	2197641	717	-	Ribosomal large subunit pseudouridine synthase B (EC 4.2.1.70)	29136931	core	91.8543	19.3848	-2.24442	5.80966	6.25989e-09	4.59228e-08
VBICloDif104613_2513	CdifQ_04003670	3517377	3517862	486	-	Enolase (EC 4.2.1.11)	29139541	unique	2871.09	605.479	-2.24545	9.31495	0	0
VBICloDif104613_1716	CdifQ_04002866	2669123	2669548	426	-	Heat shock protein GrpE	29137937	core	940.56	197.505	-2.25163	7.66547	1.77636e-14	2.03076e-13
VBICloDif104613_1999	CdifQ_04003152	2953091	2954455	1365	+	S-adenosylhomocysteine deaminase (EC 3.5.4.28); Methylthioadenosine deaminase	29138506	core	149.315	31.2845	-2.25484	7.39352	1.42997e-13	1.53775e-12
VBICloDif104613_3706	CdifQ_04000610	586076	587536	1461	+	Non-phosphorylating glyceraldehyde-3-phosphate dehydrogenase (NADP) (EC 1.2.1.9)	29133412	core	918.541	192.451	-2.25485	9.58853	0	0
VBICloDif104613_0256	CdifQ_04001387	1333361	1333876	516	+	16S rRNA processing protein RimM	29134972	core	250.731	52.3969	-2.25859	6.34206	2.26719e-10	1.88016e-09
VBICloDif104613_2948	CdifQ_04004099	3943764	3944534	771	-	Pantothenate kinase type III, CoaX-like (EC 2.7.1.33)	29140425	core	1313.81	273.706	-2.26306	9.19697	0	0
VBICloDif104613_4010	CdifQ_04000918	909247	909696	450	+	Transcriptional regulator, MarR family	29134032	core	739.147	153.466	-2.26794	7.50999	5.90639e-14	6.48629e-13
VBICloDif104613_3496	CdifQ_04000395	377147	377878	732	+	FIG00520358: hypothetical protein	29132987	core	16.3966	3.35267	-2.29002	4.19736	2.70039e-05	0.000119636
VBICloDif104613_2344	CdifQ_04003501	3339586	3340269	684	-	Transcriptional regulator, RpiR family	29139203	core	13.3959	2.73289	-2.29329	3.81108	0.000138361	0.000537427
VBICloDif104613_1328	CdifQ_04002471	2305553	2306332	780	-	Phosphatidate cytidylyltransferase (EC 2.7.7.41)	29137154	core	499.664	101.515	-2.29926	8.16917	2.22045e-16	2.8136e-15
VBICloDif104613_3212	CdifQ_04000101	92959	93402	444	+	LSU ribosomal protein L15p (L27Ae)	29132402	core	2346.72	474.583	-2.30592	9.0728	0	0
VBICloDif104613_3214	CdifQ_04000103	94731	95381	651	+	Adenylate kinase (EC 2.7.4.3)	29132406	core	3229.02	652.407	-2.30725	10.1079	0	0
VBICloDif104613_3196	CdifQ_04000085	86853	87134	282	+	SSU ribosomal protein S19p (S15e)	29132370	core	1986.34	398.656	-2.31689	7.52169	5.41789e-14	6.00441e-13
VBICloDif104613_1521	CdifQ_04002669	2492876	2493226	351	+	FIG00523141: hypothetical protein	29137544	core	141.013	28.2921	-2.31736	5.11213	3.18554e-07	1.862e-06
VBICloDif104613_0213	CdifQ_04001342	1299384	1300631	1248	+	peptidase, U32 family large subunit [C1]	29134884	core	1101.13	220.063	-2.323	9.90126	0	0
VBICloDif104613_2886	CdifQ_04004036	3882545	3882913	369	-	Transcription-repair coupling factor	29140295	unique	122.197	24.4054	-2.32393	5.01543	5.29163e-07	2.99171e-06
VBICloDif104613_1630	CdifQ_04002778	2591987	2592493	507	-	FIG00513194: hypothetical protein	29137763	core	881.61	175.999	-2.32457	8.09055	6.66134e-16	8.23914e-15
VBICloDif104613_2850	CdifQ_04004002	3855751	3856248	498	-	ATP synthase B chain (EC 3.6.3.14)	29140223	core	4123	816.628	-2.33594	10.0682	0	0
VBICloDif104613_1778	CdifQ_04002928	2725473	2727023	1551	-	PTS system, maltose and glucose-specific IIC component (EC 2.7.1.69) / PTS system, maltose and glucose-specific IIB component (EC 2.7.1.69)	29138062	core	27.4008	5.41529	-2.33911	5.71449	1.10031e-08	7.80335e-08
VBICloDif104613_2969	CdifQ_04004119	3960564	3961160	597	-	FIG00512732: hypothetical protein	29140467	core	50.7807	10.0137	-2.3423	5.09586	3.47159e-07	2.02361e-06
VBICloDif104613_2949	CdifQ_04004100	3944553	3945143	591	-	Substrate-specific component PanT of predicted pantothenate ECF transporter	29140427	core	1300.59	256.265	-2.34346	8.99961	0	0
VBICloDif104613_3208	CdifQ_04000097	91403	91792	390	+	LSU ribosomal protein L6p (L9e)	29132394	core	4666.2	914.36	-2.35141	9.78551	0	0
VBICloDif104613_1930	CdifQ_04003083	2880114	2881388	1275	-	putative sugar transporter, substrate-binding lipoprotein	29138368	core	7669.71	1496.07	-2.35799	10.6401	0	0
VBICloDif104613_2911	CdifQ_04004060	3909342	3910211	870	-	SSU rRNA (adenine(1518)-N(6)/adenine(1519)-N(6))-dimethyltransferase (EC 2.1.1.182)	29140345	core	858.195	167.34	-2.35852	9.26316	0	0
VBICloDif104613_0481	CdifQ_04001610	1547410	1547964	555	+	LrgA-associated membrane protein LrgB	29135428	core	19.6539	3.81818	-2.36386	3.9524	7.73713e-05	0.000313991
VBICloDif104613_3210	CdifQ_04000099	92217	92726	510	+	SSU ribosomal protein S5p (S2e)	29132398	core	6126.76	1188.12	-2.36644	10.5542	0	0
VBICloDif104613_2848	CdifQ_04004000	3853690	3855192	1503	-	ATP synthase alpha chain (EC 3.6.3.14)	29140219	core	1845.28	356.83	-2.37053	10.696	0	0
VBICloDif104613_0843	CdifQ_04001984	1870081	1870623	543	-	FIG00512795: hypothetical protein	29136169	core	63.7022	12.2947	-2.3733	5.08624	3.65235e-07	2.12458e-06
VBICloDif104613_1982	CdifQ_04003135	2935959	2936486	528	-	Hypoxanthine-guanine phosphoribosyltransferase (EC 2.4.2.8)	29138472	core	60.4237	11.6616	-2.37334	4.67745	2.90459e-06	1.4952e-05
VBICloDif104613_1332	CdifQ_04002475	2307897	2308601	705	-	Uridylate kinase (EC 2.7.4.-)	29137162	core	1693.38	324.772	-2.3824	9.84375	0	0
VBICloDif104613_1833	CdifQ_04002986	2782887	2783075	189	+	LSU ribosomal protein L28p	29138173	core	25422.1	4862.33	-2.38637	6.34129	2.27845e-10	1.88518e-09
VBICloDif104613_0482	CdifQ_04001611	1548484	1549242	759	+	protein of unknown function DUF161	29135430	core	154.946	29.6058	-2.38782	6.86013	6.87961e-12	6.63077e-11
VBICloDif104613_2829	CdifQ_04003981	3836799	3837716	918	+	Virulence factor MviM	29140181	core	101.567	19.3718	-2.39041	6.6234	3.51024e-11	3.17234e-10
VBICloDif104613_0133	CdifQ_04001261	1234288	1234599	312	+	LSU ribosomal protein L21p	29134721	core	14353.6	2733.27	-2.39271	10.5241	0	0
VBICloDif104613_1233	CdifQ_04002373	2212192	2212767	576	-	FIG00514609: hypothetical protein	29136963	core	1129.08	214.866	-2.39364	8.9654	0	0
VBICloDif104613_1286	CdifQ_04002429	2265973	2266680	708	-	ABC transporter, ATP-binding protein	29137069	core	44.0662	8.3764	-2.39527	5.27381	1.33623e-07	8.27779e-07
VBICloDif104613_1708	CdifQ_04002857	2660413	2661522	1110	+	Multiple sugar ABC transporter, ATP-binding protein	29137920	core	463.701	87.6235	-2.4038	8.96061	0	0
VBICloDif104613_2277	CdifQ_04003434	3266327	3267172	846	-	Vitamin B12 ABC transporter, permease component BtuC	29139068	core	47.9833	9.05234	-2.40617	5.65176	1.58811e-08	1.10466e-07
VBICloDif104613_3922	CdifQ_04000829	827950	829563	1614	+	Cold-shock DEAD-box protein A	29133854	core	906.808	170.621	-2.41	10.389	0	0
VBICloDif104613_3396	CdifQ_04000288	273989	274972	984	+	Flagellar hook protein FlgE	29132779	core	93.683	17.603	-2.41196	6.71024	1.94302e-11	1.81482e-10
VBICloDif104613_1476	CdifQ_04002622	2447585	2447929	345	+	Di-/tripeptide transporter	29137454	shared	188.178	35.3521	-2.41223	5.52853	3.22922e-08	2.18334e-07
VBICloDif104613_1956	CdifQ_04003109	2909246	2910088	843	-	Beta-glucoside bgl operon antiterminator, BglG family	29138420	core	122.749	22.9669	-2.41808	6.37054	1.88359e-10	1.57284e-09
VBICloDif104613_0134	CdifQ_04001262	1234653	1234931	279	+	FIG139598: Potential ribosomal protein	29134723	core	11656.3	2180.41	-2.41844	10.0481	0	0
VBICloDif104613_3217	CdifQ_04000107	96457	96675	219	+	Translation initiation factor 1	29132412	core	1308.84	244.172	-2.42232	5.71218	1.1154e-08	7.89494e-08
VBICloDif104613_2390	CdifQ_04003546	3393897	3395813	1917	-	PTS system, beta-glucoside-specific IIB component (EC 2.7.1.69) / PTS system, beta-glucoside-specific IIC component (EC 2.7.1.69) / PTS system, beta-glucoside-specific IIA component (EC 2.7.1.69)	29139295	core	11.1363	2.05741	-2.43637	5.18391	2.17279e-07	1.29723e-06
VBICloDif104613_0234	CdifQ_04001364	1318235	1318744	510	+	Teicoplanin resistance protein	29134928	core	76.1274	14.0508	-2.43776	5.12021	3.05189e-07	1.78965e-06
VBICloDif104613_3475	CdifQ_04000375	350886	351170	285	+	Additional substrate-specific component CbiN of cobalt ECF transporter	29132944	core	488.574	89.6017	-2.44698	6.15984	7.28195e-10	5.77457e-09
VBICloDif104613_2847	CdifQ_04003999	3852784	3853662	879	-	ATP synthase gamma chain (EC 3.6.3.14)	29140217	core	2055.14	375.192	-2.45353	10.6337	0	0
VBICloDif104613_3833	CdifQ_04000740	725323	725964	642	-	Cell division protein FtsH (EC 3.4.24.-)	29133671	core	10.4146	1.89953	-2.4549	3.55592	0.000376655	0.00135686
VBICloDif104613_2411	CdifQ_04003567	3420406	3422277	1872	-	PTS system, beta-glucoside-specific IIB component (EC 2.7.1.69) / PTS system, beta-glucoside-specific IIC component (EC 2.7.1.69) / PTS system, beta-glucoside-specific IIA component (EC 2.7.1.69)	29139337	core	70.4343	12.7904	-2.46122	7.42852	1.09912e-13	1.19616e-12
VBICloDif104613_1060	CdifQ_04002201	2065701	2065988	288	+	Ethanolamine utilization protein similar to PduA/PduJ	29136616	core	69.952	12.6914	-2.46252	4.02517	5.69349e-05	0.00023771
VBICloDif104613_0050	CdifQ_04001177	1159011	1159805	795	-	Histidinol-phosphatase (EC 3.1.3.15)	29134548	core	170.685	30.8853	-2.46635	7.24683	4.26548e-13	4.40401e-12
VBICloDif104613_3474	CdifQ_04000374	350183	350896	714	+	Substrate-specific component CbiM of cobalt ECF transporter	29132942	core	542.225	97.603	-2.47389	8.64462	0	0
VBICloDif104613_1334	CdifQ_04002477	2309676	2310389	714	-	SSU ribosomal protein S2p (SAe)	29137166	core	9409.6	1693.49	-2.47413	11.2667	0	0
VBICloDif104613_1475	CdifQ_04002621	2446546	2447622	1077	+	Di-/tripeptide transporter	29137452	core	65.0567	11.6478	-2.48165	6.48763	8.71985e-11	7.57811e-10
VBICloDif104613_2655	CdifQ_04003819	3666539	3667888	1350	-	Glucose-6-phosphate isomerase (EC 5.3.1.9)	29139826	core	2360.17	422	-2.48358	11.2431	0	0
VBICloDif104613_3191	CdifQ_04000080	83983	84294	312	+	SSU ribosomal protein S10p (S20e)	29132360	core	11145.5	1991.79	-2.48432	10.6917	0	0
VBICloDif104613_1151	CdifQ_04002294	2143002	2144438	1437	-	tRNA-i(6)A37 methylthiotransferase	29136799	core	368.578	65.4202	-2.49416	9.36029	0	0
VBICloDif104613_3193	CdifQ_04000082	85045	85668	624	+	LSU ribosomal protein L4p (L1e)	29132364	core	2476.06	438.803	-2.4964	10.4611	0	0
VBICloDif104613_3814	CdifQ_04000721	708783	709448	666	+	FIG00515718: hypothetical protein	29133632	core	305.71	54.0963	-2.49856	7.71425	1.22125e-14	1.40949e-13
VBICloDif104613_1986	CdifQ_04003139	2939738	2940739	1002	-	Aspartate--ammonia ligase (EC 6.3.1.1)	29138480	core	552.093	97.6802	-2.49877	9.34229	0	0
VBICloDif104613_3395	CdifQ_04000287	273354	273962	609	+	Flagellar basal-body rod modification protein FlgD	29132777	core	45.9786	8.11231	-2.50278	5.28459	1.25987e-07	7.83859e-07
VBICloDif104613_3416	CdifQ_04000310	290012	291949	1938	+	Chaperone protein HtpG	29132819	core	570.09	100.15	-2.50902	10.4283	0	0
VBICloDif104613_3195	CdifQ_04000084	85988	86818	831	+	LSU ribosomal protein L2p (L8e)	29132368	core	5168.49	907.557	-2.50968	11.3947	0	0
VBICloDif104613_3192	CdifQ_04000081	84386	85015	630	+	LSU ribosomal protein L3p (L3e)	29132362	core	5122.58	898.891	-2.51065	11.2323	0	0
VBICloDif104613_3201	CdifQ_04000090	89035	89289	255	+	SSU ribosomal protein S17p (S11e)	29132380	core	1223.97	212.932	-2.52311	6.94554	3.77032e-12	3.70288e-11
VBICloDif104613_0677	CdifQ_04001815	1722219	1722740	522	+	FIG00520352: hypothetical protein	29135830	core	672.801	116.782	-2.52637	8.35242	0	0
VBICloDif104613_3204	CdifQ_04000093	90042	90584	543	+	LSU ribosomal protein L5p (L11e)	29132386	core	1461.7	252.941	-2.53078	9.53458	0	0
VBICloDif104613_1810	CdifQ_04002961	2758110	2759336	1227	+	FIG00516569: hypothetical protein	29138127	core	160.985	27.8454	-2.53141	8.0527	8.88178e-16	1.0911e-14
VBICloDif104613_2024	CdifQ_04003179	2988512	2989756	1245	-	Serine hydroxymethyltransferase (EC 2.1.2.1)	29138562	core	694.675	119.91	-2.53439	10.1331	0	0
VBICloDif104613_1959	CdifQ_04003112	2911953	2912930	978	-	Oligopeptide transport ATP-binding protein OppD (TC 3.A.1.5.1)	29138426	core	596.883	102.496	-2.54188	9.45568	0	0
VBICloDif104613_2278	CdifQ_04003435	3267245	3268375	1131	-	Vitamin B12 ABC transporter, B12-binding component BtuF	29139070	core	173.38	29.7013	-2.54533	8.08222	6.66134e-16	8.23914e-15
VBICloDif104613_0797	CdifQ_04001938	1833347	1833910	564	+	Substrate-specific component STY3230 of queuosine-regulated ECF transporter	29136075	core	2456.15	420.024	-2.54786	10.192	0	0
VBICloDif104613_2862	CdifQ_04004013	3862657	3863337	681	-	Zinc transporter, ZIP family	29140247	core	22.9793	3.91265	-2.55412	4.74286	2.10717e-06	1.10512e-05
VBICloDif104613_0212	CdifQ_04001341	1298723	1299397	675	+	FIG011945: O-methyltransferase family protein	29134882	core	559.921	94.9157	-2.56051	8.7869	0	0
VBICloDif104613_3188	CdifQ_04000077	79742	80212	471	+	SSU ribosomal protein S7p (S5e)	29132354	core	11187.2	1891.23	-2.56445	11.63	0	0
VBICloDif104613_2132	CdifQ_04003289	3112241	3112588	348	-	Dihydrofolate reductase (EC 1.5.1.3)	29138778	core	23.3391	3.91483	-2.57573	3.23264	0.00122653	0.00394057
VBICloDif104613_1373	CdifQ_04002515	2347968	2348741	774	-	N-acetyl-L,L-diaminopimelate deacetylase (EC 3.5.1.47)	29137245	core	580.993	96.7072	-2.58682	9.18274	0	0
VBICloDif104613_0258	CdifQ_04001389	1334765	1335115	351	+	LSU ribosomal protein L19p	29134976	core	5540.72	917.441	-2.59438	10.5736	0	0
VBICloDif104613_1054	CdifQ_04002196	2060490	2061854	1365	+	Ethanolamine ammonia-lyase heavy chain (EC 4.3.1.7)	29136604	core	12.366	2.04195	-2.59836	5.06406	4.10422e-07	2.35716e-06
VBICloDif104613_0152	CdifQ_04001279	1249809	1250333	525	+	COG1399 protein, clustered with ribosomal protein L32p	29134759	core	3429.66	564.718	-2.60246	9.89586	0	0
VBICloDif104613_1281	CdifQ_04002424	2261225	2262493	1269	-	FIG00515794: hypothetical protein	29137059	core	182.668	30.056	-2.6035	8.4699	0	0
VBICloDif104613_2410	CdifQ_04003566	3419520	3420386	867	-	6-phospho-beta-glucosidase (EC 3.2.1.86)	29139335	core	56.7517	9.29914	-2.6095	6.20261	5.55339e-10	4.45254e-09
VBICloDif104613_1780	CdifQ_04002930	2727910	2728392	483	-	PTS system, glucose-specific IIA component (EC 2.7.1.69)	29138066	core	60.9253	9.96415	-2.61222	5.39115	7.00082e-08	4.49044e-07
VBICloDif104613_1818	CdifQ_04002969	2767803	2768507	705	-	Neuraminidase NanP	29138143	unique	126.768	20.5897	-2.62219	6.51105	7.46274e-11	6.5326e-10
VBICloDif104613_3980	CdifQ_04000887	879252	879596	345	-	FIG00513452: hypothetical protein	29133972	core	98.3943	15.98	-2.62231	5.19848	2.00928e-07	1.21158e-06
VBICloDif104613_4082	CdifQ_04000991	976649	977563	915	+	FIG00526683: hypothetical protein	29134178	core	165.402	26.8614	-2.62237	7.71499	1.19904e-14	1.38828e-13
VBICloDif104613_1346	CdifQ_04002489	2322510	2323607	1098	-	FIG00513802: hypothetical protein	29137190	core	317.461	51.5213	-2.62334	9.08831	0	0
VBICloDif104613_3183	CdifQ_04000072	69650	70015	366	+	LSU ribosomal protein L7/L12 (P1/P2)	29132344	core	29315.6	4723.63	-2.6337	12.0047	0	0
VBICloDif104613_2954	CdifQ_04004105	3951154	3951567	414	-	hypothetical fig|282458.1.peg.583 homolog	29140437	core	1480.62	236.662	-2.6453	9.25022	0	0
VBICloDif104613_0036	CdifQ_04001162	1146901	1147746	846	+	3-hydroxybutyryl-CoA dehydrogenase (EC 1.1.1.157)	29134520	core	193.371	30.8379	-2.6486	7.95427	1.77636e-15	2.13871e-14
VBICloDif104613_3206	CdifQ_04000095	90820	91218	399	+	SSU ribosomal protein S8p (S15Ae)	29132390	core	8571.51	1363.63	-2.6521	11.4795	0	0
VBICloDif104613_1310	CdifQ_04002452	2288396	2288779	384	+	Enoyl-[acyl-carrier-protein] reductase [FMN] (EC 1.3.1.9)	29137117	core	217.098	34.4058	-2.65762	6.20354	5.52069e-10	4.43614e-09
VBICloDif104613_3178	CdifQ_04000067	66851	67072	222	+	Preprotein translocase subunit SecE (TC 3.A.5.1.1)	29132334	core	847.677	134.326	-2.65778	5.58812	2.29547e-08	1.56958e-07
VBICloDif104613_1952	CdifQ_04003105	2904169	2905623	1455	-	UDP-N-acetylmuramoylalanyl-D-glutamate--2,6-diaminopimelate ligase (EC 6.3.2.13)	29138412	core	221.934	34.9286	-2.66765	9.14947	0	0
VBICloDif104613_0644	CdifQ_04001780	1695743	1696309	567	-	regulatory protein, MarR	29135761	core	110.93	17.4039	-2.67217	6.37127	1.87473e-10	1.56906e-09
VBICloDif104613_3836	CdifQ_04000743	727585	727941	357	+	LSU ribosomal protein L20p	29133677	core	15076.3	2359.27	-2.67587	11.0759	0	0
VBICloDif104613_3209	CdifQ_04000098	91828	92196	369	+	LSU ribosomal protein L18p (L5e)	29132396	core	8238.07	1287.72	-2.67749	11.4948	0	0
VBICloDif104613_3476	CdifQ_04000376	351173	351871	699	+	Transmembrane component CbiQ of energizing module of cobalt ECF transporter	29132946	core	8.5631	1.33807	-2.67797	3.45165	0.00055716	0.00193742
VBICloDif104613_3180	CdifQ_04000069	67670	68095	426	+	LSU ribosomal protein L11p (L12e)	29132338	core	6841.2	1067.32	-2.68025	11.6265	0	0
VBICloDif104613_2889	CdifQ_04004039	3885948	3886508	561	-	Peptidyl-tRNA hydrolase (EC 3.1.1.29)	29140301	core	137.872	21.4236	-2.68605	6.79474	1.08511e-11	1.03214e-10
VBICloDif104613_3202	CdifQ_04000091	89315	89683	369	+	LSU ribosomal protein L14p (L23e)	29132382	core	8808.74	1366.38	-2.68858	11.5816	0	0
VBICloDif104613_1340	CdifQ_04002483	2314670	2316580	1911	-	Clostridial MutS2-related protein	29137178	core	225.542	34.9665	-2.68935	9.61505	0	0
VBICloDif104613_3955	CdifQ_04000862	857937	858572	636	+	COG4478, integral membrane protein	29133921	core	15.2103	2.35085	-2.69379	4.18781	2.81664e-05	0.00012433
VBICloDif104613_3114		4098077	4098214	138	-	LSU ribosomal protein L34p	29140766	core	89610	13807.2	-2.69824	5.26643	1.39104e-07	8.58797e-07
VBICloDif104613_1309	CdifQ_04002451	2287782	2288393	612	+	Enoyl-[acyl-carrier-protein] reductase [FMN] (EC 1.3.1.9)	29137115	core	795.897	122.074	-2.70483	9.28885	0	0
VBICloDif104613_0796	CdifQ_04001937	1832377	1833345	969	+	preQ1-regulated inosine-uridine nucleoside hydrolase (EC 3.2.2.1)	29136073	core	1679.89	256.446	-2.71164	11.5168	0	0
VBICloDif104613_3203	CdifQ_04000092	89704	90012	309	+	LSU ribosomal protein L24p (L26e)	29132384	core	9588.21	1460.93	-2.71438	11.2872	0	0
VBICloDif104613_0184	CdifQ_04001312	1273246	1273752	507	+	Transcription termination protein NusB	29134826	core	136.577	20.76	-2.71784	6.55177	5.68587e-11	5.0628e-10
VBICloDif104613_3835	CdifQ_04000742	727335	727529	195	+	LSU ribosomal protein L35p	29133675	core	1981.22	299.008	-2.72814	4.77555	1.79214e-06	9.52302e-06
VBICloDif104613_3393	CdifQ_04000285	271657	272103	447	+	Flagellar protein FliJ	29132773	core	25.1177	3.78759	-2.72935	4.16442	3.12145e-05	0.00013662
VBICloDif104613_0035	CdifQ_04001161	1146006	1146803	798	+	3-hydroxybutyryl-CoA dehydratase (EC 4.2.1.55)	29134518	core	606.46	91.4263	-2.72973	9.63741	0	0
VBICloDif104613_1817	CdifQ_04002968	2766758	2767765	1008	-	Neuraminidase NanP	29138141	core	781.569	116.797	-2.74237	10.4895	0	0
VBICloDif104613_1333	CdifQ_04002476	2308686	2309597	912	-	Translation elongation factor Ts	29137164	core	3513.76	521.713	-2.75168	12.2826	0	0
VBICloDif104613_0798	CdifQ_04001939	1833918	1834607	690	+	FIG00519969: hypothetical protein	29136077	core	60.2007	8.91795	-2.755	6.25111	4.07545e-10	3.28592e-09
VBICloDif104613_0008	CdifQ_04000008	7287	7508	222	+	FIG00514412: hypothetical protein	29132203	core	529.529	78.4271	-2.75528	5.29596	1.18395e-07	7.39765e-07
VBICloDif104613_3094	CdifQ_04004249	4081923	4082150	228	-	SSU ribosomal protein S18p @ SSU ribosomal protein S18p, zinc-dependent	29140726	core	30616.8	4528.75	-2.75714	10.8681	0	0
VBICloDif104613_1998	CdifQ_04003151	2951601	2952944	1344	+	Xanthine/uracil/thiamine/ascorbate permease family protein	29138504	core	410.09	60.6489	-2.75739	10.1958	0	0
VBICloDif104613_3199	CdifQ_04000088	88375	88806	432	+	LSU ribosomal protein L16p (L10e)	29132376	core	6076.79	898.502	-2.75772	11.773	0	0
VBICloDif104613_3197	CdifQ_04000086	87166	87501	336	+	LSU ribosomal protein L22p (L17e)	29132372	core	21508.5	3135.13	-2.77831	12.5418	0	0
VBICloDif104613_4080	CdifQ_04000989	973271	974761	1491	+	Periplasmic [Fe] hydrogenase (EC 1.12.7.2)	29134174	core	1044.09	151.734	-2.78263	11.7847	0	0
VBICloDif104613_2409	CdifQ_04003565	3418933	3419511	579	-	6-phospho-beta-glucosidase (EC 3.2.1.86)	29139333	core	599.088	86.4862	-2.79223	9.21989	0	0
VBICloDif104613_1059	CdifQ_04002200	2064137	2065606	1470	+	Acetaldehyde dehydrogenase, ethanolamine utilization cluster	29136614	core	8.16164	1.17575	-2.79527	5.02033	5.15818e-07	2.93458e-06
VBICloDif104613_1819	CdifQ_04002970	2768564	2769373	810	-	ABC-type sugar transport system, permease component	29138145	core	516.01	73.7751	-2.80619	9.61376	0	0
VBICloDif104613_1046	CdifQ_04002188	2054600	2054926	327	+	Alcohol dehydrogenase (EC 1.1.1.1)	29136588	unique	28.7579	4.10541	-2.80836	3.00905	0.00262066	0.00777192
VBICloDif104613_0034	CdifQ_04001160	1144977	1145987	1011	+	Electron transfer flavoprotein, alpha subunit	29134516	core	482.886	68.9011	-2.80908	10.0468	0	0
VBICloDif104613_0032	CdifQ_04001158	1142981	1144117	1137	+	Butyryl-CoA dehydrogenase (EC 1.3.99.2)	29134512	core	1083.96	153.675	-2.81836	11.4692	0	0
VBICloDif104613_1057	CdifQ_04002198	2062970	2063422	453	+	Ethanolamine utilization polyhedral-body-like protein EutL	29136610	core	14.6034	2.05976	-2.82576	3.21754	0.00129296	0.00413564
VBICloDif104613_3834	CdifQ_04000741	726882	727307	426	+	Translation initiation factor 3	29133673	core	5535.45	777.768	-2.83129	11.8934	0	0
VBICloDif104613_1631	CdifQ_04002779	2592864	2593454	591	-	FIG00517435: hypothetical protein	29137765	core	11.6975	1.6426	-2.83215	3.56114	0.000369243	0.0013328
VBICloDif104613_2887	CdifQ_04004037	3882921	3884042	1122	-	Transcription-repair coupling factor	29140297	core	132.986	18.6645	-2.83291	8.34505	0	0
VBICloDif104613_3194	CdifQ_04000083	85668	85958	291	+	LSU ribosomal protein L23p (L23Ae)	29132366	core	11985.9	1677	-2.83738	11.7518	0	0
VBICloDif104613_2446	CdifQ_04003604	3458685	3459677	993	-	Putrescine transport ATP-binding protein PotA (TC 3.A.1.11.1)	29139407	shared	83.6176	11.6057	-2.84898	7.51574	5.66214e-14	6.23696e-13
VBICloDif104613_1377	CdifQ_04002519	2351290	2352093	804	-	Cystine ABC transporter, periplasmic cystine-binding protein FliY	29137253	core	1400.15	193.033	-2.85866	11.3073	0	0
VBICloDif104613_2845	CdifQ_04003997	3851114	3851374	261	-	ATP synthase epsilon chain (EC 3.6.3.14)	29140213	core	3671.75	504.018	-2.86492	9.33674	0	0
VBICloDif104613_2888	CdifQ_04004038	3884024	3885931	1908	-	Transcription-repair coupling factor	29140299	core	73.2725	9.9995	-2.87334	8.46329	0	0
VBICloDif104613_0037	CdifQ_04001163	1147833	1149008	1176	+	Acetyl-CoA acetyltransferase (EC 2.3.1.9)	29134522	core	1440.44	196.537	-2.87363	12.163	0	0
VBICloDif104613_3198	CdifQ_04000087	87524	88339	816	+	SSU ribosomal protein S3p (S3e)	29132374	core	7596.87	1034.51	-2.87645	13.1233	0	0
VBICloDif104613_3179	CdifQ_04000068	67092	67634	543	+	Transcription antitermination protein NusG	29132336	core	7316.22	987.464	-2.8893	12.8717	0	0
VBICloDif104613_0414	CdifQ_04001543	1480232	1480798	567	-	Transcriptional regulator, MerR family	29135292	core	145.61	19.519	-2.89916	7.28563	3.20188e-13	3.38298e-12
VBICloDif104613_2656	CdifQ_04003820	3668153	3669781	1629	-	Sodium-dependent phosphate transporter	29139828	core	731.661	97.9063	-2.9017	11.8537	0	0
VBICloDif104613_2590	CdifQ_04003751	3600962	3601501	540	-	Hypoxanthine-guanine phosphoribosyltransferase (EC 2.4.2.8)	29139695	core	573.751	75.742	-2.92126	9.21123	0	0
VBICloDif104613_3683	CdifQ_04000587	560951	561355	405	-	Possible Zn-finger containing protein	29133366	core	648.389	85.0606	-2.9303	8.70373	0	0
VBICloDif104613_1055	CdifQ_04002197	2061867	2062748	882	+	Ethanolamine ammonia-lyase light chain (EC 4.3.1.7)	29136606	core	5.14225	0.670736	-2.93858	3.25983	0.00111478	0.0036071
VBICloDif104613_1375	CdifQ_04002517	2349731	2350393	663	-	probable amino-acid ABC transporter, permease protein	29137249	core	1950.42	253.006	-2.94654	11.7904	0	0
VBICloDif104613_2223	CdifQ_04003379	3208410	3209231	822	-	Ferric iron ABC transporter, permease protein	29138960	core	53.5723	6.94798	-2.94682	6.71765	1.84674e-11	1.73384e-10
VBICloDif104613_1821	CdifQ_04002972	2769513	2770307	795	-	N-Acetyl-D-glucosamine ABC transport system, permease protein 1	29138149	core	477.975	61.3897	-2.96087	9.82763	0	0
VBICloDif104613_1376	CdifQ_04002518	2350629	2351297	669	-	FIG00518237: hypothetical protein	29137251	core	1142.48	145.206	-2.976	10.9484	0	0
VBICloDif104613_3096	CdifQ_04004251	4082640	4082918	279	-	SSU ribosomal protein S6p	29140730	core	30268.2	3772.47	-3.00422	13.3036	0	0
VBICloDif104613_3095	CdifQ_04004250	4082169	4082603	435	-	Single-stranded DNA-binding protein	29140728	core	14523.4	1809.33	-3.00485	13.5135	0	0
VBICloDif104613_2448	CdifQ_04003606	3460025	3460552	528	-	hypothetical protein	29139411	shared	60.9809	7.5567	-3.01253	6.06711	1.30234e-09	1.01718e-08
VBICloDif104613_1374	CdifQ_04002516	2348874	2349671	798	-	FIG00519044: hypothetical protein	29137247	core	2127.6	262.131	-3.02086	12.4901	0	0
VBICloDif104613_1731	CdifQ_04002881	2682361	2683404	1044	-	DNA polymerase III delta subunit (EC 2.7.7.7)	29137967	core	9.94126	1.1843	-3.0694	4.71853	2.37555e-06	1.23693e-05
VBICloDif104613_3181	CdifQ_04000070	68165	68863	699	+	LSU ribosomal protein L1p (L10Ae)	29132340	core	5666.53	672.815	-3.07418	13.6715	0	0
VBICloDif104613_3918	CdifQ_04000825	823384	824118	735	-	Pyruvate formate-lyase activating enzyme (EC 1.97.1.4)	29133845	core	255.871	30.3728	-3.07456	9.01893	0	0
VBICloDif104613_1954	CdifQ_04003107	2906870	2907079	210	-	PTS system, glucose-specific IIA component (EC 2.7.1.69)	29138416	unique	773.464	89.6893	-3.10833	5.3324	9.69252e-08	6.11946e-07
VBICloDif104613_0033	CdifQ_04001159	1144176	1144958	783	+	Electron transfer flavoprotein, beta subunit	29134514	core	1070.36	123.51	-3.11538	11.6464	0	0
VBICloDif104613_2318	CdifQ_04003475	3309527	3310882	1356	-	Di-/tripeptide transporter	29139151	core	923.144	105.242	-3.13284	12.4984	0	0
VBICloDif104613_3477	CdifQ_04000377	351864	352682	819	+	ATPase component CbiO of energizing module of cobalt ECF transporter	29132948	core	272.934	29.7127	-3.1994	9.6217	0	0
VBICloDif104613_1822	CdifQ_04002973	2770405	2771715	1311	-	putative sugar transporter, substrate-binding lipoprotein	29138151	core	2484.02	270.14	-3.2009	14.0154	0	0
VBICloDif104613_0623	CdifQ_04001757	1676427	1677755	1329	+	Amino acid permease	29135719	core	256.768	27.4476	-3.22571	10.6579	0	0
VBICloDif104613_3463	CdifQ_04000362	341139	341747	609	+	Alkaline phosphatase like protein	29132920	core	7.47954	0.796884	-3.23051	2.6661	0.0076736	0.0199063
VBICloDif104613_1062	CdifQ_04002203	2066889	2067518	630	+	Ethanolamine utilization protein similar to PduL	29136620	core	9.62999	1.00683	-3.25771	3.51412	0.000441208	0.00156913
VBICloDif104613_0161	CdifQ_04001288	1255345	1256094	750	+	3-oxoacyl-[acyl-carrier protein] reductase (EC 1.1.1.100)	29134779	core	1494.33	156.146	-3.25853	11.8937	0	0
VBICloDif104613_1632	CdifQ_04002780	2593534	2593893	360	-	FIG00517435: hypothetical protein	29137767	core	11.6409	1.21431	-3.26099	2.32623	0.0200062	0.0461086
VBICloDif104613_2517	CdifQ_04003674	3521566	3522768	1203	-	Phosphoglycerate kinase (EC 2.7.2.3)	29139549	core	2187.24	227.432	-3.26561	14.1513	0	0
VBICloDif104613_2066	CdifQ_04003222	3033463	3034071	609	-	FIG00521708: hypothetical protein	29138646	core	309.815	32.1415	-3.2689	9.38711	0	0
VBICloDif104613_1099	CdifQ_04002241	2099668	2100528	861	+	hypothetical protein BH3604	29136694	core	205.651	21.1577	-3.28094	9.54942	0	0
VBICloDif104613_0844	CdifQ_04001985	1870771	1871055	285	-	FIG00514138: hypothetical protein	29136171	core	197.252	20.2591	-3.2834	6.28099	3.36416e-10	2.75208e-09
VBICloDif104613_2742		3742277	3742987	711	+	two-component response regulator	29140001	shared	443.054	45.1349	-3.29517	10.4451	0	0
VBICloDif104613_3954	CdifQ_04000861	856358	857908	1551	+	ABC transporter ATP-binding protein	29133919	core	708.214	72.0993	-3.29613	12.9416	0	0
VBICloDif104613_1534	CdifQ_04002682	2503304	2504806	1503	-	Phosphomannomutase (EC 5.4.2.8)	29137570	core	781.952	79.1962	-3.30358	13.0402	0	0
VBICloDif104613_1181	CdifQ_04002325	2170394	2170777	384	+	FIG00524232: hypothetical protein	29136859	core	13.9271	1.37544	-3.33993	2.54537	0.0109162	0.0270961
VBICloDif104613_2743		3742987	3743370	384	+	hypothetical protein	29140003	shared	46.3668	4.51988	-3.35874	5.0577	4.24349e-07	2.43329e-06
VBICloDif104613_2055	CdifQ_04003211	3025206	3025466	261	-	Phosphotransferase system, phosphocarrier protein HPr	29138624	core	14379.7	1384.05	-3.37706	13.0608	0	0
VBICloDif104613_0154	CdifQ_04001281	1250741	1251298	558	+	Phosphate:acyl-ACP acyltransferase PlsX	29134763	core	2323.94	222.172	-3.38682	12.4996	0	0
VBICloDif104613_3647	CdifQ_04000552	525859	526329	471	-	FIG00513713: hypothetical protein	29133294	core	113.418	10.7185	-3.40347	7.20098	5.97744e-13	6.11928e-12
VBICloDif104613_3182	CdifQ_04000071	69086	69592	507	+	LSU ribosomal protein L10p (P0)	29132342	core	15695.7	1475.14	-3.41145	15.4357	0	0
VBICloDif104613_0158	CdifQ_04001285	1253451	1254380	930	+	Enoyl-[acyl-carrier-protein] reductase [FMN] (EC 1.3.1.9)	29134772	core	1697.32	158.479	-3.4209	13.2607	0	0
VBICloDif104613_0162	CdifQ_04001289	1256148	1256372	225	+	Acyl carrier protein	29134781	core	1958.54	177.432	-3.46445	7.94931	1.77636e-15	2.13871e-14
VBICloDif104613_1955	CdifQ_04003108	2907087	2908898	1812	-	PTS system, glucose-specific IIB component (EC 2.7.1.69) / PTS system, glucose-specific IIC component (EC 2.7.1.69)	29138418	core	2737.17	244.599	-3.4842	15.6492	0	0
VBICloDif104613_0852	CdifQ_04001993	1875889	1877508	1620	-	Sodium-dependent phosphate transporter	29136187	core	61.9267	5.33148	-3.53795	9.30235	0	0
VBICloDif104613_0157	CdifQ_04001284	1252356	1253342	987	+	3-oxoacyl-[acyl-carrier-protein] synthase, KASIII (EC 2.3.1.41)	29134770	core	1736.52	147.594	-3.55649	13.8498	0	0
VBICloDif104613_1489	CdifQ_04002636	2460696	2461613	918	-	1-phosphofructokinase (EC 2.7.1.56)	29137480	core	74.2029	6.04138	-3.61852	8.5383	0	0
VBICloDif104613_2449	CdifQ_04003607	3460831	3461874	1044	-	iron ABC transporter, solute-binding lipoprotein	29139413	shared	2813.2	228.505	-3.62192	15.469	0	0
VBICloDif104613_0163	CdifQ_04001290	1256401	1257639	1239	+	3-oxoacyl-[acyl-carrier-protein] synthase, KASII (EC 2.3.1.41)	29134783	core	4759.81	379.57	-3.64847	15.58	0	0
VBICloDif104613_1785	CdifQ_04002934	2732778	2733773	996	+	L-asparaginase (EC 3.5.1.1)	29138077	core	578.858	41.8083	-3.79135	12.8906	0	0
VBICloDif104613_2222	CdifQ_04003378	3207513	3208205	693	-	Ferric iron ABC transporter, permease protein	29138958	unique	120.41	8.44949	-3.83294	9.07584	0	0
VBICloDif104613_0904	CdifQ_04002045	1916538	1917605	1068	+	FIG00513847: hypothetical protein	29136295	core	1865.71	122.3	-3.93123	15.7288	0	0
VBICloDif104613_2767	CdifQ_04003916	3763066	3764826	1761	-	Pyruvate kinase (EC 2.7.1.40)	29140051	core	1882.91	112.976	-4.05888	17.2513	0	0
VBICloDif104613_3648	CdifQ_04000553	526333	526986	654	-	membrane protein, putative	29133296	core	334.609	19.8342	-4.07641	11.2756	0	0
VBICloDif104613_3646	CdifQ_04000551	524536	525846	1311	-	putative amidohydrolase	29133292	core	727.141	41.482	-4.13168	14.8085	0	0
VBICloDif104613_0685	CdifQ_04001824	1729615	1729803	189	+	Ferredoxin	29135847	core	1548.56	86.0951	-4.16885	2.68454	0.00726295	0.0189359
VBICloDif104613_3919	CdifQ_04000826	824278	826509	2232	-	Pyruvate formate-lyase (EC 2.3.1.54)	29133847	core	3501.8	194.376	-4.17118	18.6851	0	0
VBICloDif104613_2768	CdifQ_04003917	3764878	3765837	960	-	6-phosphofructokinase (EC 2.7.1.11)	29140053	core	1172.69	61.8221	-4.24556	15.3302	0	0
VBICloDif104613_4081	CdifQ_04000990	975019	976515	1497	+	Periplasmic [Fe] hydrogenase (EC 1.12.7.2)	29134176	core	369.729	19.4818	-4.24627	13.9837	0	0
VBICloDif104613_1047	CdifQ_04002189	2055030	2055479	450	+	Alcohol dehydrogenase (EC 1.1.1.1)	29136590	core	40.182	1.94893	-4.36579	4.85965	1.17596e-06	6.38932e-06
VBICloDif104613_1370	CdifQ_04002512	2345053	2346114	1062	-	Proton/sodium-glutamate symport protein	29137239	core	3676.35	176.219	-4.38284	18.3522	0	0
VBICloDif104613_1565	CdifQ_04002713	2535178	2536563	1386	-	FIG00516592: hypothetical protein	29137632	core	86.1485	3.92952	-4.4544	10.8816	0	0
VBICloDif104613_0282	CdifQ_04001413	1360044	1360490	447	+	Iron-sulfur cluster regulator IscR	29135025	core	719.074	29.7417	-4.59558	12.4586	0	0
VBICloDif104613_1563	CdifQ_04002711	2532185	2533576	1392	-	Succinate-semialdehyde dehydrogenase, CoA-dependent	29137628	core	218.627	8.97247	-4.60682	13.2603	0	0
VBICloDif104613_1488	CdifQ_04002635	2458740	2460659	1920	-	PTS system, fructose-specific IIA component (EC 2.7.1.69) / PTS system, fructose-specific IIB component (EC 2.7.1.69) / PTS system, fructose-specific IIC component (EC 2.7.1.69)	29137478	core	405.932	15.6237	-4.69943	15.7684	0	0
VBICloDif104613_2519	CdifQ_04003676	3524057	3525079	1023	-	Central glycolytic genes regulator	29139553	core	4567.95	171.404	-4.73608	19.7552	0	0
VBICloDif104613_1564	CdifQ_04002712	2533607	2535151	1545	-	Succinyl-CoA:coenzyme A transferase (EC 2.8.3.-)	29137630	core	160.751	5.95934	-4.75353	13.1112	0	0
VBICloDif104613_2518	CdifQ_04003675	3522990	3523997	1008	-	NAD-dependent glyceraldehyde-3-phosphate dehydrogenase (EC 1.2.1.12)	29139551	core	11360.1	407.435	-4.80126	21.3045	0	0
VBICloDif104613_2239	CdifQ_04003395	3226445	3229099	2655	-	Alcohol dehydrogenase (EC 1.1.1.1); Acetaldehyde dehydrogenase (EC 1.2.1.10)	29138992	core	2814.25	63.3958	-5.47222	23.0169	0	0
VBICloDif104613_1878	CdifQ_04003032	2826351	2827772	1422	-	Carbon starvation protein A	29138264	core	3489.33	74.7322	-5.54508	22.0569	0	0
VBICloDif104613_0684	CdifQ_04001823	1728866	1729456	591	+	Serine acetyltransferase (EC 2.3.1.30)	29135845	core	4876.35	52.1564	-6.54681	21.3012	0	0
VBICloDif104613_0683	CdifQ_04001822	1727931	1728839	909	+	Cysteine synthase (EC 2.5.1.47)	29135843	core	1898.46	13.9547	-7.08794	20.8297	0	0

## Sheet: CD630
Differentially expressed genes in strain C. difficile 630 during nutrient shift
PATRIC_Locus	RefSeq_Locus	Start	End	Gene length	Strand	FID	PID	COG	type	PATRIC gene name	Refseq gene name	Gene Symbol	Ctrl	BDM	log2(fold_change)	test_stat	p_value	q_value
VBICloDif38397_0011	CD0003	2805	3011	207	+	19438037	126697569	COG2501S	core	FIG002958: hypothetical protein	RNA-binding mediating protein		1088.15	356.244	-1.61094	5.02021	5.16161e-07	1.90401e-06
VBICloDif38397_0013	CD0005	4145	6046	1902	+	19438041	126697571	COG0187L	core	DNA gyrase subunit B (EC 5.99.1.3)	DNA gyrase subunit B	gyrB	563.437	155.391	-1.85835	9.27971	0	0
VBICloDif38397_0014	CD0006	6066	8492	2427	+	19438043	126697572	COG0188L	core	DNA gyrase subunit A (EC 5.99.1.3)	DNA gyrase subunit A	gyrA	491.007	168.835	-1.54013	7.51301	5.77316e-14	3.93283e-13
VBICloDif38397_0017	CD0009	9129	9446	318	+	19438049	126697575	COG1366T	core	Anti-sigma F factor antagonist (spoIIAA-2); Anti-sigma B factor antagonist RsbV	anti-anti-sigma factor	rsbV	39.111	122.857	1.65133	-4.10496	4.04378e-05	0.000118547
VBICloDif38397_0021	CD0013	16612	17493	882	+	19438065	126697579	COG0668M	core	Small-conductance mechanosensitive channel	mechanosensitive ion channel protein		14.267	53.6355	1.9105	-6.19618	5.78505e-10	2.88118e-09
VBICloDif38397_0029	CD0020	34145	34558	414	+	19438175	126697586	-	core	FIG00520835: hypothetical protein	hypothetical protein		169.801	52.1299	-1.70367	6.09712	1.07995e-09	5.21779e-09
VBICloDif38397_0030	CD0021	34867	38298	3432	+	19438177	126697587	COG1038C	core	Pyruvate carboxyl transferase (EC 6.4.1.1)	pyruvate carboxylase	pyc	271.808	1800.8	2.72798	-10.2204	0	0
VBICloDif38397_0031	CD0022	38540	40468	1929	+	19438179	400927238	-	core	Translation elongation factor G-related protein	elongation factor G (EF-G)		45.6886	1469.43	5.00728	-19.0403	0	0
VBICloDif38397_0049	CD0040	63807	66755	2949	+	19438215	126697606	COG1221KT	core	NtrC family Transcriptional regulator, ATPase domain	PTS operon transcription antiterminator		2.94131	17.6744	2.58713	-8.2411	2.22045e-16	1.72777e-15
VBICloDif38397_0050	CD0041	66733	67197	465	+	19438217	126697607	COG1762GT	core	PTS system, galactitol-specific IIA component (EC 2.7.1.69)	PTS system galactitol-specific transporter subunit IIA		2.20778	22.1891	3.32919	-4.39619	1.10166e-05	3.49778e-05
VBICloDif38397_0051	CD0042	67292	67579	288	+	19438219	126697608	COG3414G	core	PTS system, galactitol-specific IIB component (EC 2.7.1.69)	PTS system galactitol-specific transporter subunit IIB		4.01753	48.8386	3.60364	-3.62534	0.000288577	0.000729859
VBICloDif38397_0052	CD0043	67656	69005	1350	+	19438221	126697609	COG3775G	core	PTS system, galactitol-specific IIC component (EC 2.7.1.69)	PTS system galactitol-specific transporter subunit IIC		1.70602	24.8451	3.86425	-9.20066	0	0
VBICloDif38397_0054	CD0045	69685	70335	651	+	19438225	126697611	COG0235G	core	Ribulose-5-phosphate 4-epimerase and related epimerases and aldolases	sugar-phosphate aldolase		3.42674	23.6387	2.78625	-5.73366	9.82866e-09	4.3471e-08
VBICloDif38397_0056	CD0047	71715	72428	714	+	19438229	126697613	COG1211I	core	2-C-methyl-D-erythritol 4-phosphate cytidylyltransferase (EC 2.7.7.60)	2-C-methyl-D-erythritol 4-phosphate cytidylyltransferase	ispD	170.048	32.9775	-2.36639	9.50599	0	0
VBICloDif38397_0057	CD0048	72425	72910	486	+	19438231	126697614	COG0245I	core	2-C-methyl-D-erythritol 2,4-cyclodiphosphate synthase (EC 4.6.1.12)	"2-C-methyl-D-erythritol 2,4-cyclo diphosphate synthase"	ispF	356.477	65.9848	-2.4336	10.006	0	0
VBICloDif38397_0058	CD0049	73277	74992	1716	+	19438233	126697615	COG0442J	core	Prolyl-tRNA synthetase (EC 6.1.1.15), bacterial type	prolyl-tRNA ligase	proS	688.591	124.173	-2.47129	12.4876	0	0
VBICloDif38397_0068	CD0058	83724	84917	1194	+	19438253	126697624	COG0050J	core	Translation elongation factor Tu	elongation factor Tu	tufA	14227.3	1544.17	-3.20376	13.13	0	0
VBICloDif38397_0070	CD0059	85342	85563	222	+	19438257	126697626	COG0690U	core	Preprotein translocase subunit SecE (TC 3.A.5.1.1)	preprotein translocase subunit SecE	secE	1080.71	118.83	-3.185	9.55573	0	0
VBICloDif38397_0071	CD0060	85583	86125	543	+	19438259	126697627	COG0250K	core	Transcription antitermination protein NusG	transcription antitermination protein	nusG	4430.27	443.255	-3.32119	16.614	0	0
VBICloDif38397_0072	CD0061	86164	86589	426	+	19438261	126697628	COG0080J	core	LSU ribosomal protein L11p (L12e)	50S ribosomal protein L11	rplK	5783.96	586.284	-3.30238	16.4079	0	0
VBICloDif38397_0073	CD0062	86660	87358	699	+	19438263	126697629	COG0081J	core	LSU ribosomal protein L1p (L10Ae)	50S ribosomal protein L1	rplA	4836.81	555.154	-3.12309	15.366	0	0
VBICloDif38397_0074	CD0063	87581	88087	507	+	19438265	126697630	COG0244J	core	LSU ribosomal protein L10p (P0)	50S ribosomal protein L10	rplJ	10525.7	1515.97	-2.7956	13.2583	0	0
VBICloDif38397_0075	CD0064	88144	88509	366	+	19438267	126697631	COG0222J	core	LSU ribosomal protein L7/L12 (P1/P2)	50S ribosomal protein L7/L12	rplL	12664.6	2797.91	-2.17838	10.2345	0	0
VBICloDif38397_0077	CD0066	90160	93876	3717	+	19438271	126697633	COG0085K	core	DNA-directed RNA polymerase beta subunit (EC 2.7.7.6)	DNA-directed RNA polymerase subunit beta	rpoB	1737.72	427.994	-2.02154	8.44523	0	0
VBICloDif38397_0078	CD0067	93918	97403	3486	+	19438273	126697634	COG0086K	core	DNA-directed RNA polymerase beta' subunit (EC 2.7.7.6)	DNA-directed RNA polymerase subunit beta'	rpoC	2168.62	507.991	-2.09391	8.66296	0	0
VBICloDif38397_0079	CD0068	97689	98114	426	+	19438275	161723227	COG0048J	core	SSU ribosomal protein S12p (S23e)	30S ribosomal protein S12	rpsL	11983.1	1995.02	-2.58653	12.3146	0	0
VBICloDif38397_0080	CD0069	98238	98708	471	+	19438277	126697636	COG0049J	core	SSU ribosomal protein S7p (S5e)	30S ribosomal protein S7	rpsG	8040.68	1244.39	-2.69188	13.1979	0	0
VBICloDif38397_0081	CD0070	98757	100823	2067	+	19438279	126697637	COG0480J	core	Translation elongation factor G	elongation factor G	fusA	4746.72	736.211	-2.68874	11.2393	0	0
VBICloDif38397_0082	CD0071	100916	102109	1194	+	19438281	126697638	COG0050J	core	Translation elongation factor Tu	elongation factor Tu	tufB	14307.3	1531.58	-3.22366	13.2283	0	0
VBICloDif38397_0083	CD0072	102481	102792	312	+	19438283	126697639	COG0051J	core	SSU ribosomal protein S10p (S20e)	30S ribosomal protein S10	rpsJ	9730.87	1245.67	-2.96564	14.9046	0	0
VBICloDif38397_0084	CD0073	102884	103513	630	+	19438285	126697640	COG0087J	core	LSU ribosomal protein L3p (L3e)	50S ribosomal protein L3	rplC	6002.79	678.547	-3.14511	15.5114	0	0
VBICloDif38397_0085	CD0074	103543	104166	624	+	19438287	400927241	-	core	LSU ribosomal protein L4p (L1e)	50S ribosomal protein L4	rplD	3453.42	450.074	-2.93979	14.6339	0	0
VBICloDif38397_0086	CD0075	104166	104456	291	+	19438289	126697642	COG0089J	core	LSU ribosomal protein L23p (L23Ae)	50S ribosomal protein L23	rplW	5234.27	462.316	-3.50104	16.1576	0	0
VBICloDif38397_0087	CD0076	104486	105316	831	+	19438291	126697643	COG0090J	core	LSU ribosomal protein L2p (L8e)	50S ribosomal protein L2	rplB	4939.26	525.489	-3.23256	15.6884	0	0
VBICloDif38397_0088	CD0077	105351	105632	282	+	19438293	126697644	COG0185J	core	SSU ribosomal protein S19p (S15e)	30S ribosomal protein S19	rpsS	2244.56	298.295	-2.91162	12.5853	0	0
VBICloDif38397_0089	CD0078	105664	105999	336	+	19438295	126697645	COG0091J	core	LSU ribosomal protein L22p (L17e)	50S ribosomal protein L22	rplV	20549.2	1196.63	-4.10203	20.589	0	0
VBICloDif38397_0090	CD0079	106022	106837	816	+	19438297	126697646	COG0092J	core	SSU ribosomal protein S3p (S3e)	30S ribosomal protein S3	rpsC	6774.27	357.799	-4.24284	21.1219	0	0
VBICloDif38397_0091	CD0080	106873	107304	432	+	19438299	126697647	COG0197J	core	LSU ribosomal protein L16p (L10e)	50S ribosomal protein L16	rplP	5842.99	425.619	-3.77907	18.5436	0	0
VBICloDif38397_0092	CD0080A	107306	107509	204	+	19438301	126697648	COG0255J	core	LSU ribosomal protein L29p (L35e)	50S ribosomal protein L29	rpmC	577.462	89.8847	-2.68358	4.84586	1.26064e-06	4.47388e-06
VBICloDif38397_0093	CD0081	107533	107787	255	+	19438303	126697649	COG0186J	core	SSU ribosomal protein S17p (S11e)	30S ribosomal protein S17	rpsQ	832.329	68.4612	-3.6038	11.07	0	0
VBICloDif38397_0094	CD0082	107813	108181	369	+	19438305	126697650	COG0093J	core	LSU ribosomal protein L14p (L23e)	50S ribosomal protein L14	rplN	10351.9	727.326	-3.83114	19.001	0	0
VBICloDif38397_0095	CD0083	108202	108510	309	+	19438307	400927242	-	core	LSU ribosomal protein L24p (L26e)	50S ribosomal protein L24	rplX	11457.6	618.897	-4.21046	20.2012	0	0
VBICloDif38397_0096	CD0084	108540	109082	543	+	19438309	126697652	COG0094J	core	LSU ribosomal protein L5p (L11e)	50S ribosomal protein L5	rplE	2255.72	242.751	-3.21604	15.5171	0	0
VBICloDif38397_0098	CD0085	109318	109716	399	+	19438313	126697654	COG0096J	core	SSU ribosomal protein S8p (S15Ae)	30S ribosomal protein S8	rpsH	12132.3	630.928	-4.26524	21.1405	0	0
VBICloDif38397_0099	CD0086	109747	110289	543	+	19438315	126697655	COG0097J	core	LSU ribosomal protein L6p (L9e)	50S ribosomal protein L6	rplF	3918.06	386.841	-3.34033	16.4649	0	0
VBICloDif38397_0100	CD0087	110325	110693	369	+	19438317	126697656	COG0256J	core	LSU ribosomal protein L18p (L5e)	50S ribosomal protein L18	rplR	8020.35	446.436	-4.16714	20.178	0	0
VBICloDif38397_0101	CD0088	110714	111223	510	+	19438319	126697657	COG0098J	core	SSU ribosomal protein S5p (S2e)	30S ribosomal protein S5	rpsE	6939.13	505.977	-3.77761	18.9143	0	0
VBICloDif38397_0102	CD0088A	111238	111423	186	+	19438321	126697658	COG1841J	core	LSU ribosomal protein L30p (L7e)	50S ribosomal protein L30	rpmD	743.589	73.6542	-3.33567	2.4736	0.013376	0.0254359
VBICloDif38397_0103	CD0089	111456	111899	444	+	19438323	126697659	COG0200J	core	LSU ribosomal protein L15p (L27Ae)	50S ribosomal protein L15	rplO	3303.61	358.092	-3.20564	15.5325	0	0
VBICloDif38397_0104	CD0090	111943	113211	1269	+	19438325	126697660	COG0201U	core	Preprotein translocase secY subunit (TC 3.A.5.1.1)	preprotein translocase subunit SecY	prlA	2301.93	266.853	-3.10873	15.3486	0	0
VBICloDif38397_0105	CD0091	113228	113878	651	+	19438327	126697661	COG0563F	core	Adenylate kinase (EC 2.7.4.3)	adenylate kinase	adk	3172.24	240.985	-3.71849	18.3315	0	0
VBICloDif38397_0106	CD0092	113879	114625	747	+	19438329	126697662	COG0024J	core	Methionine aminopeptidase (EC 3.4.11.18)	methionine aminopeptidase Map1 (MAP) (Peptidase M)	map1	8255.29	562.101	-3.87642	18.9401	0	0
VBICloDif38397_0108	CD0094	114954	115172	219	+	19438333	126697664	COG0361J	core	Translation initiation factor 1	translation initiation factor IF-1	infA	923.713	84.4935	-3.45053	8.62424	0	0
VBICloDif38397_0110	CD0095	115474	115845	372	+	19438337	126697666	COG0099J	core	SSU ribosomal protein S13p (S18e)	30S ribosomal protein S13	rpsM	5211.37	396.977	-3.71454	17.7466	0	0
VBICloDif38397_0111	CD0096	115881	116279	399	+	19438339	126697667	COG0100J	core	SSU ribosomal protein S11p (S14e)	30S ribosomal protein S11	rpsK	21542.1	1083.76	-4.31304	21.4655	0	0
VBICloDif38397_0112	CD0097	116311	116934	624	+	19438341	126697668	COG0522J	core	SSU ribosomal protein S4p (S9e)	30S ribosomal protein S4	rpsD	7589.22	583.816	-3.70037	18.4282	0	0
VBICloDif38397_0113	CD0098	117012	117959	948	+	19438343	126697669	COG0202K	core	DNA-directed RNA polymerase alpha subunit (EC 2.7.7.6)	DNA-directed RNA polymerase subunit alpha	rpoA	5444.88	529.422	-3.36241	16.1646	0	0
VBICloDif38397_0114	CD0099	117980	118321	342	+	19438345	126697670	COG0203J	core	LSU ribosomal protein L17p	50S ribosomal protein L17	rplQ	13501.5	1036.3	-3.70361	18.6623	0	0
VBICloDif38397_0119	CD0104	121808	122239	432	+	19438355	126697675	COG0102J	core	LSU ribosomal protein L13p (L13Ae)	50S ribosomal protein L13	rplM	4195.62	1126.24	-1.89737	9.40317	0	0
VBICloDif38397_0120	CD0105	122268	122660	393	+	19438357	126697676	COG0103J	core	SSU ribosomal protein S9p (S16e)	30S ribosomal protein S9	rpsI	26022.9	5493.38	-2.24402	9.69774	0	0
VBICloDif38397_0121	CD0106	123166	123870	705	+	19438359	126697677	COG0860M	core	N-acetylmuramoyl-L-alanine amidase (EC 3.5.1.28)	"Germination-specific N-acetylmuramoyl-L-alanine amidase, Autolysin"	cwlD	89.1376	29.4251	-1.59898	5.98763	2.12923e-09	1.00685e-08
VBICloDif38397_0128	CD0112	156254	157156	903	+	19438463	126697684	COG0280C	core	phosphotransbutyrylase (EC 2.3.1.19)	phosphate butyryltransferase	ptb	139.827	4950.57	5.14588	-19.3144	0	0
VBICloDif38397_0129	CD0113	157178	158257	1080	+	19438465	126697685	COG3426C	core	Butyrate kinase (EC 2.7.2.7)	butyrate kinase	buk	122.106	4393.31	5.1691	-19.1767	0	0
VBICloDif38397_0130	CD0114	158247	158924	678	+	19438467	126697686	-	core	FIG00623394: hypothetical protein	hypothetical protein		155.168	5473.32	5.14051	-19.3438	0	0
VBICloDif38397_0131	CD0115	158967	159182	216	+	19438469	126697687	COG2221C	core	2-oxoglutarate oxidoreductase, delta subunit, putative (EC 1.2.7.3)	"4Fe-4S ferredoxin, iron-sulfur binding domain-containing protein subunit delta"		268.028	7792.88	4.8617	-15.9149	0	0
VBICloDif38397_0132	CD0116	159211	160290	1080	+	19438471	126697688	COG0674C	core	2-oxoglutarate oxidoreductase, alpha subunit (EC 1.2.7.3)	2-ketoisovalerate ferredoxin reductase		972.54	30116.7	4.95266	-19.6948	0	0
VBICloDif38397_0133	CD0117	160290	161042	753	+	19438473	126697689	COG1013C	core	Pyruvate synthase subunit porB (EC 1.2.7.1)	ferredoxin/flavodoxin oxidoreductase subunit beta		1110.99	32642.7	4.87685	-18.7243	0	0
VBICloDif38397_0134	CD0118	161043	161600	558	+	19438475	126697690	COG1014C	core	2-oxoglutarate oxidoreductase, gamma subunit (EC 1.2.7.3)	ferredoxin/flavodoxin oxidoreductase subunit gamma		593.03	36510.4	5.94406	-21.9024	0	0
VBICloDif38397_0140	CD0124	169522	170586	1065	+	19438487	126697696	COG2385D	core	Stage II sporulation protein D (SpoIID)	stage II sporulation protein D	spoIIC	259.151	82.4464	-1.65227	7.68558	1.53211e-14	1.08314e-13
VBICloDif38397_0141	CD0125	170652	171320	669	+	19438489	126697697	COG0739M	core	Stage II sporulation protein related to metaloproteases (SpoIIQ)	cell wall endopeptidase		724.059	203.594	-1.83041	8.86207	0	0
VBICloDif38397_0146	CD0130	174387	175580	1194	+	19438499	126697702	COG0192H	core	S-adenosylmethionine synthetase (EC 2.5.1.6)	S-adenosylmethionine synthetase	metE	1731.36	481.221	-1.84713	8.85919	0	0
VBICloDif38397_0147	CD0131	175896	176993	1098	+	19438501	126697703	COG3949S	core	FIG00513310: hypothetical protein	membrane protein		1.8507	6.22704	1.75048	-3.61635	0.000298791	0.000753548
VBICloDif38397_0159	CD0142	188593	189144	552	+	19438525	126697714	COG1544J	core	Ribosomal subunit interface protein	RNA-binding protein		1067.1	6838.48	2.67998	-10.8372	0	0
VBICloDif38397_0162	CD0145	193217	195358	2142	+	19438531	400927245	-	core	Transcription accessory protein (S1 RNA-binding domain)	S1 RNA-binding domain-containing protein		141.441	27.9047	-2.34162	10.8429	0	0
VBICloDif38397_0163	CD0146	195506	196672	1167	+	19438533	126697718	COG1228Q	core	amidohydrolase	hydrolase		251.126	51.9396	-2.27351	10.482	0	0
VBICloDif38397_0165	CD0148	197908	198948	1041	+	19438537	126697720	-	core	FIG00518049: hypothetical protein	hypothetical protein		28.8463	86.057	1.57691	-6.06357	1.33136e-09	6.36334e-09
VBICloDif38397_0170	CD0153	202040	204748	2709	+	19438547	126697725	COG1882C	core	Pyruvate formate-lyase (EC 2.3.1.54)	"4-hydroxyphenylacetate decarboxylase,catalytic subunit HpdB"	hpdB	26.7196	131.68	2.30107	-10.2198	0	0
VBICloDif38397_0172	CD0155	205002	205952	951	+	19438551	126697727	COG1180O	core	Pyruvate formate-lyase activating enzyme (EC 1.97.1.4)	"4-hydroxyphenylacetate decarboxylase,activating subunit HpdA; putative glycyl-radical activating family protein"	hpdA	21.2436	112.559	2.40558	-8.70676	0	0
VBICloDif38397_0178	CD0161	212270	213832	1563	+	19438563	126697731	COG1132V	core	FIG00517584: hypothetical protein	ABC transporter multidrug-family ATP-binding protein		5.19812	32.1712	2.62971	-8.20169	2.22045e-16	1.72777e-15
VBICloDif38397_0179	CD0162	213854	215275	1422	+	19438565	126697732	COG0641R	core	Transcriptional regulatory protein	radical SAM-family protein		7.605	54.102	2.83066	-9.23984	0	0
VBICloDif38397_0180	CD0163	215499	216374	876	+	19438567	126697733	-	core	FIG00528932: hypothetical protein	hypothetical protein		13.4287	72.3695	2.43006	-7.90238	2.66454e-15	1.96987e-14
VBICloDif38397_0181	CD0163B	216692	216895	204	+	19438569	126697735	-	core	FIG00512961: hypothetical protein	hypothetical protein		312.083	3663.53	3.55323	-10.6535	0	0
VBICloDif38397_0183	CD0165	217806	219155	1350	-	19438573	126697737	COG0531E	core	putative amino acid transporter	amino acid transporter		2.08157	10.337	2.31208	-5.5826	2.36954e-08	9.97169e-08
VBICloDif38397_0193	CD0174	230672	232573	1902	+	19438593	126697747	COG1151C	core	Similar to carbon monoxide dehydrogenase CooS subunit	carbon monoxide dehydrogenase		525.679	2191.84	2.05989	-7.99388	1.33227e-15	1.00372e-14
VBICloDif38397_0194	CD0175	232566	233039	474	+	19438595	126697748	COG0437C	core	Nitrite reductase probable electron transfer 4Fe-S subunit (EC 1.7.1.4)	"oxidoreductase, Fe-S subunit"		515.675	1982.02	1.94244	-8.71924	0	0
VBICloDif38397_0195	CD0176	233014	234240	1227	+	19438597	126697749	COG1251C	core	Nitrite reductase probable [NAD(P)H] subunit (EC 1.7.1.4)	"oxidoreductase, NAD/FAD binding subunit"		222.578	1375.88	2.62797	-10.9419	0	0
VBICloDif38397_0198	CD0179	236792	238057	1266	+	19438603	126697752	COG0334E	core	NAD-specific glutamate dehydrogenase (EC 1.4.1.2)	NAD-specific glutamate dehydrogenase	gluD	1050.07	34028.6	5.01819	-20.6481	0	0
VBICloDif38397_0200	CD0181	239189	240322	1134	+	19438607	126697754	COG4219KT	core	Regulatory sensor-transducer, BlaR1/MecR1 family	"membrane-associated metalloprotease,M56 family"		8.53126	29.4458	1.78723	-5.5617	2.67153e-08	1.11371e-07
VBICloDif38397_0205	CD0187	245187	245771	585	+	19438617	126697760	COG0461F	core	Orotate phosphoribosyltransferase (EC 2.4.2.10)	orotate phosphoribosyltransferase	pyrE	757.723	219.895	-1.78486	8.54289	0	0
VBICloDif38397_0206	CD0188	245986	246912	927	+	19438619	126697761	COG1893H	core	2-dehydropantoate 2-reductase (EC 1.1.1.169)	ketopantoate reductase		26.0238	79.2984	1.60746	-5.92312	3.15888e-09	1.45317e-08
VBICloDif38397_0211	CD0193	251943	252227	285	+	19438629	126697766	COG0234O	core	Heat shock protein 60 family co-chaperone GroES	10 kDa chaperonin (Protein Cpn10) (GroES protein)	groES	1310.89	285.689	-2.19803	9.41418	0	0
VBICloDif38397_0223	CD0205	268442	270472	2031	+	19438653	126697776	COG3711K	core	PTS system IIA 2 domain protein	PTS operon transcription antiterminator		393.01	54.6442	-2.84642	13.5084	0	0
VBICloDif38397_0224	CD0206	270469	270921	453	+	19438655	126697777	COG1762GT	core	PTS system, fructose-specific IIA component (EC 2.7.1.69)	PTS system fructose-like transporter subunit IIA		997.06	89.7388	-3.47388	14.6315	0	0
VBICloDif38397_0225	CD0207	270923	271978	1056	+	19438657	126697778	COG1299G	core	PTS system, fructose-specific IIC component (EC 2.7.1.69)	PTS system fructose-like transporter subunit IIC		1668.53	226.422	-2.88149	14.4763	0	0
VBICloDif38397_0226	CD0208	272045	272353	309	+	19438659	126697779	COG1445G	core	PTS system, fructose-specific IIB component (EC 2.7.1.69)	PTS system fructose-like transporter subunit IIB		2676.66	506.577	-2.40158	11.2779	0	0
VBICloDif38397_0227	CD0209	272457	273722	1266	+	19438661	126697780	COG4573G	core	FIG00774563: hypothetical protein	tagatose 6-phosphate kinase		7532.45	1051.98	-2.84001	12.0842	0	0
VBICloDif38397_0228	CD0210	273810	274523	714	+	19438663	126697781	COG1011R	core	2-haloalkanoic acid dehalogenase (EC 3.8.1.2)	"hydrolase, HAD superfamily, subfamily IA"		852.403	162.281	-2.39304	11.5064	0	0
VBICloDif38397_0246	CD0228	294131	294445	315	+	19438699	126697799	COG1886NU	core	flagellar motor switch protein	flagellar motor switch protein FliN	fliN	2.16117	47.8014	4.46717	-3.56431	0.000364809	0.000909721
VBICloDif38397_0299	CD0279	340278	340673	396	+	19438805	126697851	COG5015S	core	FIG00516345: hypothetical protein	hypothetical protein		64.9984	386.492	2.57196	-9.0439	0	0
VBICloDif38397_0301	CD0281	341439	342170	732	-	19438809	126697853	-	core	FIG00522882: hypothetical protein	hypothetical protein		3.35674	9.75995	1.53981	-3.02202	0.00251093	0.00549166
VBICloDif38397_0304	CD0284	346714	347118	405	+	19438815	126697856	COG2893G	core	PTS system, mannose-specific IIA component (EC 2.7.1.69)	PTS system mannose/fructose/sorbose transporter subunit IIA		2.66122	62.8231	4.56114	-5.05732	4.25185e-07	1.58652e-06
VBICloDif38397_0305	CD0285	347142	347639	498	+	19438817	126697857	COG3444G	core	PTS system, mannose-specific IIB component (EC 2.7.1.69)	PTS system mannose/fructose/sorbose transporter subunit IIB		0.460353	18.4923	5.32804	-2.69321	0.00707685	0.014331
VBICloDif38397_0306	CD0286	347642	348043	402	+	19438819	126697858	COG2893G	core	putative PTS system, IIa component	PTS system mannose/fructose/sorbose transporter subunit IIA		0.663059	49.276	6.2156	-3.14902	0.00163819	0.00368464
VBICloDif38397_0307	CD0287	348061	348549	489	+	19438821	126697859	COG3444G	core	PTS system, mannose-specific IIB component (EC 2.7.1.69)	PTS system mannose/fructose/sorbose transporter subunit IIB		0.899307	84.1539	6.54807	-5.19578	2.03868e-07	7.80358e-07
VBICloDif38397_0308	CD0288	348576	349331	756	+	19438823	126697860	COG3715G	core	PTS system, mannose-specific IIC component (EC 2.7.1.69)	PTS system mannose/fructose/sorbose transporter subunit IIC		1.96294	115.409	5.87759	-10.6502	0	0
VBICloDif38397_0309	CD0289	349331	350194	864	+	19438825	126697861	COG3716G	core	PTS system, mannose-specific IID component (EC 2.7.1.69)	PTS system mannose/fructose/sorbose transporter subunit IID		1.03007	70.7436	6.10179	-8.56713	0	0
VBICloDif38397_0310	CD0290	350241	350720	480	+	19438827	126697862	-	core	FIG00518116: hypothetical protein	hypothetical protein		4.14617	253.444	5.93374	-11.2055	0	0
VBICloDif38397_0311	CD0291	350785	352092	1308	+	19438829	126697863	COG0624E	core	Acetylornithine deacetylase/Succinyl-diaminopimelate desuccinylase and related deacylases	"peptidase, M20A family"		1.03478	5.54886	2.42286	-4.31834	1.57208e-05	4.91449e-05
VBICloDif38397_0322	CD0301	362100	363611	1512	+	19438851	126697873	COG1129G	core	Ribose ABC transport system, ATP-binding protein RbsA (TC 3.A.1.2.1)	ABC transporter ribose-specific ATP-binding protein	rbsA	1.19095	8.29462	2.80006	-5.86509	4.4889e-09	2.03345e-08
VBICloDif38397_0323	CD0302	363595	364593	999	+	19438853	126697874	COG1172G	core	Ribose ABC transport system, permease protein RbsC (TC 3.A.1.2.1)	ABC transporter ribose-specific permease	rbsC	3.6227	15.1336	2.06262	-5.22844	1.70942e-07	6.62891e-07
VBICloDif38397_0324	CD0303	364777	366039	1263	+	19438855	126697875	COG0624E	core	Acetylornithine deacetylase (EC 3.5.1.16)	acetylornithine deacetylase ArgE	argE	1.87402	11.9335	2.67082	-5.94373	2.78604e-09	1.29845e-08
VBICloDif38397_0325	CD0304	366059	366802	744	+	19438857	126697876	COG5426S	core	Putative cytoplasmic protein	hypothetical protein		9.74373	29.5431	1.60028	-4.56531	4.98747e-06	1.64828e-05
VBICloDif38397_0338	CD0318	385049	385972	924	-	19438889	126697890	COG1131V	shared	ABC transporter, ATP-binding protein	ABC transporter bacitracin/multidrug-family ATP-binding protein		65.7554	16.7452	-1.97336	7.27908	3.36176e-13	2.17749e-12
VBICloDif38397_0344	CD0324	391385	392137	753	+	19438901	126697896	COG0310P	core	Substrate-specific component CbiM of cobalt ECF transporter	cobalamin biosynthesis protein	cbiM	723.038	83.3015	-3.11766	14.4662	0	0
VBICloDif38397_0345	CD0325	392127	392411	285	+	19438903	126697897	COG1930P	core	Additional substrate-specific component CbiN of cobalt ECF transporter	ABC transporter cobalt-specific extracellular solute-binding protein	cbiN	896.723	82.4323	-3.44338	12.3703	0	0
VBICloDif38397_0346	CD0326	392414	393112	699	+	19438905	126697898	COG0619P	core	Transmembrane component CbiQ of energizing module of cobalt ECF transporter	ABC transporter cobalt-specific permease	cbiQ	46.7664	10.4573	-2.16097	6.59408	4.27889e-11	2.32656e-10
VBICloDif38397_0347	CD0327	393105	393923	819	+	19438907	126697899	COG1122P	core	ATPase component CbiO of energizing module of cobalt ECF transporter	ABC transporter cobalt-specific ATP-binding protein	cbiO	1011.17	68.1397	-3.89139	18.004	0	0
VBICloDif38397_0354	CD0334	404609	407251	2643	+	19438921	126697906	COG1454C	core	Alcohol dehydrogenase (EC 1.1.1.1); Acetaldehyde dehydrogenase (EC 1.2.1.10)	bifunctional acetaldehyde-CoA/alcohol dehydrogenase	adhE	4.13575	44.2767	3.42033	-11.6057	0	0
VBICloDif38397_0357	CD0337	408668	411244	2577	-	19438927	126697909	COG4591M	core	FIG00516776: hypothetical protein	ABC transporter permease		4.51375	17.1125	1.92266	-6.33638	2.35222e-10	1.20352e-09
VBICloDif38397_0360	CD0340	413328	418385	5058	-	19438933	126697912	-	core	FIG00513637: hypothetical protein	hypothetical protein		62.1943	232.316	1.90124	-8.08757	6.66134e-16	5.09413e-15
VBICloDif38397_0361	CD0341	418410	418829	420	-	19438935	126697913	-	core	FIG00514740: hypothetical protein	hypothetical protein		35.6118	188.725	2.40586	-7.62261	2.4869e-14	1.72386e-13
VBICloDif38397_0379	CD0359	430953	431372	420	-	19438971	126697929	COG1191K	core	conjugative transposon conserved hypothetical protein	"RNA polymerase sigma factor Tn916-like,CTn1-Orf4"		15.1442	49.0968	1.69687	-4.44866	8.64083e-06	2.77819e-05
VBICloDif38397_0387	CD0367	438435	439343	909	-	19438987	126697937	COG0642T	unique	Sensory transduction protein kinase (EC 2.7.3.-)	"two-component sensor histidine kinase,Tn916-like,CTn1-Orf12"		21.343	7.12355	-1.5831	4.57778	4.69943e-06	1.55597e-05
VBICloDif38397_0412	CD0392	463846	464442	597	-	19439037	126697961	COG0535R	core	Radical SAM-superfamily protein	radical SAM-family protein		69.9497	586.451	3.06762	-12.3207	0	0
VBICloDif38397_0413	CD0393	464469	464996	528	-	19439039	126697962	-	core	Substrate-specific component PdxU2 of predicted pyridoxin-related ECF transporter	membrane protein		15.3316	176.901	3.52836	-10.4228	0	0
VBICloDif38397_0415	CD0395	467033	468232	1200	+	19439043	126697964	COG1804C	core	Hydroxyproline dehydratase putative	Isocaprenoyl-CoA:2-hydroxyisocaproate CoA-transferase	hadA	5619.28	16739.6	1.57481	-5.94694	2.7321e-09	1.27498e-08
VBICloDif38397_0416	CD0396	468271	469071	801	+	19439045	400927263	-	core	Benzoyl-CoA reductase subunit BadG (EC 1.3.99.15)	activator of 2-hydroxyisocaproyl-CoA dehydratase	hadI	2916.51	9457.17	1.69717	-6.40631	1.49079e-10	7.78452e-10
VBICloDif38397_0417	CD0397	469086	470312	1227	+	19439047	400927264	-	core	Benzoyl-CoA reductase subunit BadE (EC 1.3.99.15)	subunit of oxygen-sensitive 2-hydroxyisocaproyl-CoA dehydratase B	hadB	2320.44	8907.91	1.94069	-7.19857	6.08402e-13	3.86335e-12
VBICloDif38397_0418	CD0398	470312	471439	1128	+	19439049	126697967	COG1775E	core	Benzoyl-CoA reductase subunit BadD (EC 1.3.99.15)	subunit of oxygen-sensitive 2-hydroxyisocaproyl-CoA dehydratase C	hadC	3202.18	10321	1.68845	-6.2548	3.98019e-10	2.00192e-09
VBICloDif38397_0424	CD0404	477999	478328	330	+	19439061	126697973	-	core	FIG00514161: hypothetical protein	hypothetical protein		327.175	104.365	-1.64843	6.1898	6.02392e-10	2.99177e-09
VBICloDif38397_0463	CD0440	521848	523008	1161	+	19439139	126698013	COG2247M	core	FIG00514915: hypothetical protein	cell wall binding protein		93.1248	1008.11	3.43634	-14.0871	0	0
VBICloDif38397_0468	CD0444	527458	528888	1431	+	19439149	126698018	COG0498E	core	2-amino-4-ketopentanoate thiolase, beta subunit	2-amino-4-ketopentanoate thiolase subunit beta		1.74767	5.17635	1.5665	-3.56535	0.000363367	0.00090676
VBICloDif38397_0478	CD0454	538777	539613	837	+	19439169	126698030	COG2207K	core	Transcriptional regulator, AraC family	AraC family transcriptional regulator		85.672	26.9166	-1.67033	6.47101	9.73523e-11	5.15924e-10
VBICloDif38397_0479	CD0455	539697	541811	2115	+	19439171	126698031	COG3973R	core	ATP-dependent DNA helicase rep (EC 3.6.1.-)	"helicase, UvrD family"		178.299	34.8707	-2.35421	11.072	0	0
VBICloDif38397_0482	CD0458	545392	546318	927	+	19439177	126698034	COG2602V	core	Regulatory protein BlaR1	beta-lactamase		17.8505	3.74556	-2.25271	5.46736	4.5678e-08	1.85635e-07
VBICloDif38397_0491	CD0467	555699	556514	816	+	19439195	400927275	-	core	Hydrolase (HAD superfamily)	"hydrolase, HAD superfamily, subfamily IIB"		0.444771	3.13416	2.81694	-2.18932	0.0285738	0.049955
VBICloDif38397_0492	CD0468	556528	558192	1665	+	19439197	126698044	COG0366G	core	Family 13 glycosyl hydrolase, row 724	"oligo-1,6-glucosidase (Sucrase-isomaltase)"	malL	0.590356	5.33155	3.1749	-4.745	2.08509e-06	7.28349e-06
VBICloDif38397_0493	CD0469	558197	560071	1875	+	19439199	126698045	COG1263G	core	PTS system, sucrose-specific IIB component (EC 2.7.1.69) / PTS system, sucrose-specific IIC component (EC 2.7.1.69) / PTS system, sucrose-specific IIA component (EC 2.7.1.69)	PTS system sucrose-specific transporter subunit IIABC		5.12509	17.5358	1.77465	-5.60061	2.13594e-08	9.08541e-08
VBICloDif38397_0499	CD0475	565058	565684	627	-	19439211	126698051	COG1573L	core	FIG00514436: hypothetical protein	hypothetical protein		1.25262	10.9185	3.12375	-3.72427	0.000195881	0.000506583
VBICloDif38397_0505	CD0481	569476	570168	693	+	19439223	126698058	COG0745TK	core	Two-component response regulator	two-component response regulator	spaR	132.754	21.5971	-2.61985	9.76909	0	0
VBICloDif38397_0506	CD0482	570187	571611	1425	+	19439225	126698059	COG5002T	core	Subtilin biosynthesis sensor protein spaK (EC 2.7.3.-)	two-component sensor histidine kinase	spaK	61.3838	17.9192	-1.77635	7.22087	5.16476e-13	3.28549e-12
VBICloDif38397_0507	CD0483	571851	574319	2469	-	19439227	126698060	COG4591M	core	FIG00518263: hypothetical protein	ABC transporter permease		1.38189	4.32165	1.64494	-4.13528	3.54528e-05	0.000104797
VBICloDif38397_0511	CD0487	577809	578636	828	-	19439235	126698064	COG0388R	core	FIG003879: Predicted amidohydrolase / Omega amidase (Nit2 homolog)	carbon-nitrogen hydrolase		54.2259	438.603	3.01586	-12.4391	0	0
VBICloDif38397_0513	CD0489	579471	580151	681	-	19439239	126698066	COG0152F	core	Phosphoribosylaminoimidazole-succinocarboxamide synthase (EC 6.3.2.6)	phosphoribosylaminoimidazolesuccinocarboxamide synthase		49.8635	143.972	1.52973	-5.84825	4.96762e-09	2.24173e-08
VBICloDif38397_0542	CD0517	617747	618508	762	+	19439297	400927279	-	core	FIG00513732: hypothetical protein	membrane protein		208.846	52.6119	-1.98897	8.51835	0	0
VBICloDif38397_0544	CD0519	619331	620407	1077	+	19439301	126698100	-	core	FIG00519258: hypothetical protein	hypothetical protein		1406.98	4212.13	1.58195	-6.14207	8.14524e-10	3.98411e-09
VBICloDif38397_0554	CD0528	632929	634239	1311	-	19439321	126698107	COG1473R	core	putative amidohydrolase	amidohydrolase		321.886	62.9958	-2.35322	11.2013	0	0
VBICloDif38397_0556	CD0530	634726	635577	852	-	19439325	126698109	-	core	membrane protein, putative	membrane protein		165.925	55.0572	-1.59153	6.90588	4.98912e-12	2.93245e-11
VBICloDif38397_0566	CD0540	646067	646507	441	+	19439345	126698119	COG0835NT	core	Positive regulator of CheA protein activity (CheW)	Chemotaxis protein CheW		8.91444	37.5405	2.07423	-4.31786	1.57551e-05	4.91881e-05
VBICloDif38397_0576	CD0550	655805	656461	657	+	19439365	126698129	-	core	conserved hypothetical protein	membrane protein		1.30926	18.8091	3.84461	-5.14714	2.64495e-07	1.00378e-06
VBICloDif38397_0577	CD0551	656969	658240	1272	-	19439367	126698130	COG3409M	core	spore cortex-lytic enzyme SleC	spore cortex-lytic enzyme pre-pro-form	sleC	0.5645	4.76193	3.0765	-3.7504	0.000176554	0.00046096
VBICloDif38397_0585	CD0558	664959	665888	930	+	19439383	126698137	COG2066E	core	Glutaminase (EC 3.5.1.2)	glutaminase	glsA	120.981	351.305	1.53795	-7.13558	9.63896e-13	6.02392e-12
VBICloDif38397_0589	CD0562	669424	669828	405	-	19439391	400927282	-	core	Possible Zn-finger containing protein	RusA-like endodeoxyribonuclease		114.042	30.2543	-1.91435	6.05679	1.38862e-09	6.62812e-09
VBICloDif38397_0593	CD0566	675554	676024	471	+	19439399	126698145	COG0219J	core	tRNA (cytidine(34)-2'-O)-methyltransferase (EC 2.1.1.207)	tRNA/rRNA methyltransferase		214.63	63.874	-1.74855	6.85477	7.14273e-12	4.15705e-11
VBICloDif38397_0594	CD0567	676060	676908	849	+	19439401	126698146	COG1307S	core	DegV family protein	hypothetical protein		379.304	98.1558	-1.95021	9.13389	0	0
VBICloDif38397_0599	CD0572	680846	681664	819	+	19439411	126698150	-	core	FIG00513909: hypothetical protein	sporulation protein		7.29888	34.8922	2.25716	-6.34915	2.16503e-10	1.11578e-09
VBICloDif38397_0602	CD0575	686149	687240	1092	+	19439417	126698153	-	core	FIG00516897: hypothetical protein	hypothetical protein		17.1597	66.7805	1.9604	-6.79316	1.09706e-11	6.2219e-11
VBICloDif38397_0608	CD0580	693198	694658	1461	+	19439429	126698158	COG1012C	core	Non-phosphorylating glyceraldehyde-3-phosphate dehydrogenase (NADP) (EC 1.2.1.9)	glyceraldehyde-3-phosphate dehydrogenase (NADP(+)) (GADPH)	gapN	123.525	26.2414	-2.23489	9.8035	0	0
VBICloDif38397_0609	CD0581	695032	695637	606	+	19439431	400927284	-	core	TetR-family transcriptional regulator	TetR family transcriptional regulator		26.2844	111.274	2.08184	-6.96541	3.27449e-12	1.96691e-11
VBICloDif38397_0612	CD0583	698825	700054	1230	-	19439437	126698161	COG2199T	unique	putative signaling protein	diguanylate kinase signaling protein		2.04027	19.1836	3.23304	-7.78449	7.10543e-15	5.11476e-14
VBICloDif38397_0616	CD0587	704792	705067	276	+	19439445	126698165	-	core	FIG00513568: hypothetical protein	hypothetical protein		218.477	1993.37	3.18965	-12.1271	0	0
VBICloDif38397_0618	CD0589	705775	708270	2496	+	19439449	126698167	COG4987CO	core	FIG00515128: hypothetical protein	hypothetical protein		1.9754	8.1044	2.03656	-5.72828	1.01456e-08	4.47059e-08
VBICloDif38397_0621	CD0592	715862	716257	396	-	19439455	126698170	-	core	FIG00514581: hypothetical protein	hypothetical protein		3.92738	17.2584	2.13566	-3.08144	0.00205999	0.00458405
VBICloDif38397_0626	CD0596	720829	721050	222	+	19439465	126698174	-	core	FIG00518672: hypothetical protein	hypothetical protein		32.4265	196.87	2.602	-4.6879	2.76017e-06	9.43766e-06
VBICloDif38397_0628	CD0598	721375	721947	573	+	19439469	126698176	COG3546P	core	Polypeptide composition of the spore coat protein CotJC	spore-coat protein	cotJC1	4.73822	19.319	2.0276	-4.28418	1.83416e-05	5.66169e-05
VBICloDif38397_0652	CD0622	744283	744504	222	-	19439517	126698199	-	core	FIG00524011: hypothetical protein	hypothetical protein		74.4512	24.3461	-1.6126	2.19356	0.028267	0.0495403
VBICloDif38397_0658	CD0628	751541	752122	582	+	19439529	126698206	-	core	FIG00517005: hypothetical protein	membrane protein		1.76402	13.1739	2.90075	-3.99804	6.38692e-05	0.000181116
VBICloDif38397_0661	CD0631	755054	755575	522	+	19439535	126698209	COG1695K	core	Transcriptional regulator, PadR family	transcriptional regulator		43.838	9.11144	-2.26643	5.72438	1.03811e-08	4.56307e-08
VBICloDif38397_0662	CD0632	755707	755964	258	+	19439537	126698210	-	shared	TolA protein	hypothetical protein		290.995	20.0297	-3.86079	7.3323	2.26263e-13	1.48723e-12
VBICloDif38397_0663	CD0633	756182	757261	1080	+	19439539	126698211	COG4335L	core	FIG00517873: hypothetical protein	hypothetical protein		38.2416	9.21198	-2.05356	6.93929	3.94063e-12	2.34329e-11
VBICloDif38397_0678	CD0646	768417	769097	681	+	19439569	126698224	-	core	putative lantibiotic ABC transporter, permease protein	ABC transporter lantibiotic/multidrug-family permease		0.964536	4.32669	2.16536	-2.39913	0.0164342	0.030549
VBICloDif38397_0680	CD0648	770514	771164	651	+	19439573	126698226	COG1802K	core	GntR-family transcriptional regulator	GntR family transcriptional regulator		1451.14	470.677	-1.62438	8.21644	2.22045e-16	1.72777e-15
VBICloDif38397_0683	CD0651	775587	776777	1191	+	19439579	126698229	-	core	FIG00513927: hypothetical protein	permease		50.2048	7.81976	-2.68263	9.28293	0	0
VBICloDif38397_0697	CD0663	795843	803975	8133	+	19439607	126698240	COG5263R	core	Choline binding protein A	Toxin A	tcdA	35.4669	142.646	2.00789	-8.49598	0	0
VBICloDif38397_0709	CD0673	817408	818073	666	+	19439631	126698252	COG2230M	core	FIG00515718: hypothetical protein	methyltransferase		231.953	50.4271	-2.20156	9.26781	0	0
VBICloDif38397_0711	CD0676	819393	820172	780	-	19439635	126698255	-	core	Conserved protein	hypothetical protein		8.78027	30.8321	1.8121	-5.19956	1.9976e-07	7.68772e-07
VBICloDif38397_0712	CD0677	820169	820648	480	-	19439637	126698256	COG1595K	core	FIG00513559: hypothetical protein	RNA polymerase sigma factor		1.88959	12.2912	2.70148	-3.21271	0.0013149	0.00298581
VBICloDif38397_0720	CD0685	831313	831738	426	+	19439653	126698264	COG0290J	core	Translation initiation factor 3	translation initiation factor IF-3	infC	5346.98	1566.41	-1.77126	8.63993	0	0
VBICloDif38397_0722	CD0687	832016	832372	357	+	19439657	126698266	COG0292J	core	LSU ribosomal protein L20p	50S ribosomal protein L20	rplT	10940.8	3043.47	-1.84593	8.74333	0	0
VBICloDif38397_0742	CD0707	860709	863207	2499	+	19439697	400927303	-	core	FIG00516055: hypothetical protein	diguanylate kinase signaling protein		115.158	405.941	1.81766	-7.96665	1.55431e-15	1.16361e-14
VBICloDif38397_0744	CD0709	865181	867559	2379	+	19439701	126698288	COG1193L	core	Recombination inhibitory protein MutS2	DNA mismatch repair protein		191.678	47.0734	-2.0257	9.87045	0	0
VBICloDif38397_0745	CD0710	867627	868040	414	+	19439703	126698289	COG1683S	core	FIG00517001: hypothetical protein	hypothetical protein		297.021	80.517	-1.8832	7.45846	8.74856e-14	5.91442e-13
VBICloDif38397_0750	CD0714	873295	874437	1143	+	19439713	126698293	COG5010U	core	TPR repeats containing protein	hypothetical protein		318.528	72.2531	-2.14029	10.1317	0	0
VBICloDif38397_0751	CD0715	874770	875681	912	+	19439715	126698295	COG0280C	core	Phosphate butyryltransferase (EC 2.3.1.19)	phosphate butyryltransferase (Phosphotransbutyrylase)		110.358	1030	3.22239	-13.6574	0	0
VBICloDif38397_0752	CD0716	876288	878207	1920	+	19439717	126698296	COG1151C	core	Similar to carbon monoxide dehydrogenase CooS subunit	bifunctional carbon monoxide dehydrogenase/acetyl-CoA synthase (CODH)	cooS	242.449	2207.01	3.18634	-12.3689	0	0
VBICloDif38397_0754	CD0717	878517	879296	780	+	19439721	126698297	COG3640D	core	CO dehydrogenase accessory protein CooC (nickel insertion)	"bifunctional carbon monoxide dehydrogenase/acetyl-CoA synthase, accessory protein"	cooC	89.2293	1354.49	3.92409	-15.816	0	0
VBICloDif38397_0755	CD0718	879545	881221	1677	+	19439723	126698298	COG2759F	core	Formate--tetrahydrofolate ligase (EC 6.3.4.3)	formate--tetrahydrofolate ligase	fhs	181.528	1770.79	3.28613	-12.9376	0	0
VBICloDif38397_0756	CD0719	881326	881958	633	+	19439725	126698299	COG3404E	core	Formiminotetrahydrofolate cyclodeaminase (EC 4.3.1.4)	"methenyltetrahydrofolate cyclohydrolase (5,10-methenyltetrahydrofolate 5-hydrolase)"	fchA	113.064	554.085	2.29296	-10.0411	0	0
VBICloDif38397_0757	CD0720	882050	882922	873	+	19439727	400927305	-	core	Methylenetetrahydrofolate dehydrogenase (NADP+) (EC 1.5.1.5) / Methenyltetrahydrofolate cyclohydrolase (EC 3.5.4.9)	"bifunctional 5,10-methylene-tetrahydrofolate dehydrogenase/5,10-methenyl-tetrahydrofolate cyclohydrolase FolD"	folD	131.374	550.935	2.0682	-9.36584	0	0
VBICloDif38397_0758	CD0721	882959	883633	675	+	19439729	126698301	-	core	Zinc-finger protein	hypothetical protein		64.7908	339.201	2.38828	-9.76573	0	0
VBICloDif38397_0759	CD0722	883669	884550	882	+	19439731	126698302	COG0685E	core	5,10-methylenetetrahydrofolate reductase (EC 1.5.1.20)	"5,10-methylenetetrahydrofolate reductase"		132.354	563.959	2.09119	-9.48531	0	0
VBICloDif38397_0760	CD0723	884594	885979	1386	+	19439733	126698303	COG1249C	core	Dihydrolipoamide dehydrogenase (EC 1.8.1.4)	"bifunctional carbon monoxide dehydrogenase/acetyl-CoA synthase, dihydrolipoyl dehydrogenase subunit"		39.8157	302.466	2.92536	-12.3325	0	0
VBICloDif38397_0761	CD0724	886035	886805	771	+	19439735	126698304	COG3640D	core	CO dehydrogenase accessory protein CooC (nickel insertion)	"bifunctional carbon monoxide dehydrogenase/acetyl-CoA synthase,nickel-inserting subunit"		78.2301	694.864	3.15093	-13.2896	0	0
VBICloDif38397_0762	CD0725	886825	887769	945	+	19439737	126698305	COG2069C	core	Acetyl-CoA synthase corrinoid iron-sulfur protein, small subunit	acetyl-CoA decarbonylase/synthase complex subunit delta		50.3203	672.081	3.73942	-15.1507	0	0
VBICloDif38397_0763	CD0726	887800	889167	1368	+	19439739	126698306	COG1456C	core	Acetyl-CoA synthase corrinoid iron-sulfur protein, large subunit	acetyl-CoA decarbonylase/synthase complex subunit gamma		109.862	1364.65	3.63476	-14.57	0	0
VBICloDif38397_0764	CD0727	889217	890023	807	+	19439741	126698307	COG1410E	core	5-methyltetrahydrofolate:corrinoid iron-sulfur protein methyltransferase	"bifunctional carbon monoxide dehydrogenase/acetyl-CoA synthase, methyltransferase subunit"		249.249	2325.25	3.22173	-13.2784	0	0
VBICloDif38397_0765	CD0728	890080	892206	2127	+	19439743	126698308	COG1614C	core	CO dehydrogenase/acetyl-CoA synthase, acetyl-CoA synthase subunit (EC 2.3.1.169)	bifunctional acetyl-CoA decarbonylase/synthase complex subunit alpha/beta		155.854	1772.11	3.5072	-13.5873	0	0
VBICloDif38397_0766	CD0729	892293	892670	378	+	19439745	126698309	COG0509E	core	Glycine cleavage system H protein	glycine cleavage system protein H	gcvH	1420.12	10103.5	2.83077	-11.5519	0	0
VBICloDif38397_0767	CD0730	892782	894710	1929	+	19439747	126698310	COG3894R	core	Acetyl-CoA synthase corrinoid activation protein	iron-sulfur protein		25.2497	158.602	2.65107	-11.254	0	0
VBICloDif38397_0768	CD0731	894735	895607	873	+	19439749	126698311	COG1856S	core	putative radical SAM superfamily protein	radical SAM superfamily protein		32.001	172.807	2.43297	-9.20822	0	0
VBICloDif38397_0769	CD0732	895604	896542	939	+	19439751	126698312	COG2516R	core	putative radical SAM superfamily protein	radical SAM superfamily protein		14.4856	111.801	2.94824	-9.8503	0	0
VBICloDif38397_0770	CD0733	896589	897404	816	+	19439753	126698313	COG0095H	core	Lipoate-protein ligase A	biotin/lipoate-protein ligase		50.3635	206.864	2.03823	-8.32257	0	0
VBICloDif38397_0772	CD0735	897764	898180	417	+	19439757	126698315	-	core	FIG00514404: hypothetical protein	hypothetical protein		513.456	1514.3	1.56034	-7.23034	4.81837e-13	3.08168e-12
VBICloDif38397_0773	CD0736	898196	898546	351	+	19439759	126698316	-	core	FIG00516495: hypothetical protein	hypothetical protein		2365.42	7222.71	1.61044	-6.95843	3.4408e-12	2.05985e-11
VBICloDif38397_0774	CD0737	899092	899871	780	+	19439761	126698317	COG1387ER	core	Histidinol-phosphatase (EC 3.1.3.15)	histidinol-phosphatase	hisK	185.364	57.155	-1.69741	7.32001	2.48024e-13	1.62726e-12
VBICloDif38397_0778	CD0741	903936	905462	1527	+	19439769	126698321	COG0554C	core	Glycerol kinase (EC 2.7.1.30)	glycerol kinase (GK)	glpK1	1.67774	5.10807	1.60626	-3.75094	0.000176176	0.00046031
VBICloDif38397_0795	CD0758	928164	928898	735	-	19439805	126698338	COG1180O	core	Pyruvate formate-lyase activating enzyme (EC 1.97.1.4)	pyruvate formate-lyase activating enzyme	plfA	119.587	19.2381	-2.63602	9.72129	0	0
VBICloDif38397_0796	CD0759	929058	931289	2232	-	19439807	126698339	COG1882C	core	Pyruvate formate-lyase (EC 2.3.1.54)	pyruvate formate-lyase	plfB	1440.08	85.8464	-4.06825	20.4201	0	0
VBICloDif38397_0797	CD0760	931648	932643	996	+	19439809	126698340	COG0530P	core	Ca2+/Na+ antiporter	Ca2+/Na+ antiporter		2.45175	0.614265	-1.99688	2.23314	0.0255397	0.0454096
VBICloDif38397_0798	CD0761	932734	934347	1614	+	19439811	126698341	COG0513LKJ	core	Cold-shock DEAD-box protein A	ATP-dependent RNA helicase		739.29	127.422	-2.53652	12.7051	0	0
VBICloDif38397_0799	CD0762	934622	936607	1986	+	19439813	126698342	COG3711K	core	Sorbitol operon transcription regulator	PTS operon transcription antiterminator		1.00121	13.0569	3.70499	-8.282	2.22045e-16	1.72777e-15
VBICloDif38397_0800	CD0763	936612	937046	435	+	19439815	126698343	COG4578K	core	Glucitol operon activator protein	Sorbitol operon activator protein (Glucitol)	gutM	0.575891	11.7902	4.35564	-2.18984	0.0285355	0.0499126
VBICloDif38397_0801	CD0764	937075	937635	561	+	19439817	126698344	COG3730G	core	PTS system, glucitol/sorbitol-specific IIC component (EC 2.7.1.69)	PTS system glucitol/sorbitol-specific transporter subunit IIC	gutA	2.00776	19.618	3.28852	-4.84075	1.29347e-06	4.58582e-06
VBICloDif38397_0802	CD0765	937699	938067	369	+	19439819	126698345	COG3732G	core	PTS system, glucitol/sorbitol-specific IIB component and second of two IIC components (EC 2.7.1.69)	PTS system sorbitol-specific transporter subunit IIB	srlE	7.76827	54.7015	2.81592	-5.59239	2.23964e-08	9.48115e-08
VBICloDif38397_0805	CD0768	939165	939938	774	+	19439825	126698348	COG1028IQR	core	Sorbitol-6-phosphate 2-dehydrogenase (EC 1.1.1.140)	sorbitol-6-phosphate dehydrogenase	gutD	4.47772	34.5209	2.94664	-7.51568	5.66214e-14	3.8646e-13
VBICloDif38397_0813	CD0776	946539	947555	1017	+	19439841	126698356	COG1609K	core	LacI-family transcriptional regulator	LacI family transcriptional regulator		73.3707	337.488	2.20156	-9.81599	0	0
VBICloDif38397_0814	CD0777	947930	948772	843	+	19439843	126698357	-	core	FIG00519676: hypothetical protein	membrane protein		19.2723	93.3716	2.27646	-7.85467	3.9968e-15	2.92441e-14
VBICloDif38397_0815	CD0778	948787	949251	465	+	19439845	126698358	-	core	FIG00521263: hypothetical protein	hypothetical protein		1.02882	17.2605	4.0684	-3.30906	0.000936085	0.00220445
VBICloDif38397_0816	CD0779	949265	950410	1146	+	19439847	126698359	COG1473R	core	Catalyzes the cleavage of p-aminobenzoyl-glutamate to p-aminobenzoate and glutamate, subunit A	"amidohydrolase, M20D peptidase family"		13.7918	148.133	3.42502	-12.2434	0	0
VBICloDif38397_0817	CD0780	950454	951389	936	+	19439849	126698360	-	core	FIG00514912: hypothetical protein	hypothetical protein		13.1823	180.473	3.77511	-12.8405	0	0
VBICloDif38397_0818	CD0781	951664	954357	2694	-	19439851	126698361	COG0744M	core	Multimodular transpeptidase-transglycosylase (EC 2.4.1.129) (EC 3.4.-.-)	penicillin-binding protein		486.866	136.237	-1.8374	9.06609	0	0
VBICloDif38397_0820	CD0783	955481	956488	1008	-	19439855	126698363	-	core	Stage IV sporulation protein B	"stage IV sporulation protein SpoIVB, S55 peptidase family"		1.24695	4.45928	1.83841	-3.00202	0.00268191	0.00582583
VBICloDif38397_0822	CD0785	957802	959352	1551	+	19439859	126698365	COG0488R	core	ABC transporter ATP-binding protein	ABC transporter ATP-binding protein		497.846	55.7475	-3.15872	15.1881	0	0
VBICloDif38397_0826	CD0789	961938	962615	678	+	19439867	400927306	-	core	FOG: HEAT repeat	hypothetical protein		158.288	1401.49	3.14634	-13.3522	0	0
VBICloDif38397_0827	CD0790	962701	963144	444	+	19439869	126698370	-	core	Bis(5'-nucleosyl)-tetraphosphatase (Asymmetrical) (EC 3.6.1.17)	NUDIX family hydrolase		449.837	5107.95	3.50527	-14.4625	0	0
VBICloDif38397_0835	CD0798	969149	970411	1263	+	19439885	126698378	-	core	FIG00517762: hypothetical protein	membrane protein		0.810962	2.4379	1.58793	-2.21388	0.0268369	0.0474786
VBICloDif38397_0850	CD0813	985913	986215	303	+	19439915	126698393	COG1445G	core	FIG00516270: hypothetical protein	PTS system transporter subunit IIB		3.5958	43.7958	3.60641	-3.6777	0.000235348	0.000600357
VBICloDif38397_0852	CD0815	987150	987992	843	-	19439919	126698395	COG2814G	core	Inositol transport protein	"transporter, Major Facilitator Superfamily (MFS)"		1.23401	6.34213	2.36161	-3.40805	0.000654299	0.00157848
VBICloDif38397_0869	CD0831	1006531	1007658	1128	-	19439953	126698411	COG0513LKJ	core	ATP-dependent RNA helicase BA2475	ATP-dependent RNA helicase		105.898	23.7451	-2.15698	8.87047	0	0
VBICloDif38397_0873	CD0835	1012613	1013062	450	+	19439961	126698415	COG1846K	core	Transcriptional regulator, MarR family	MarR family transcriptional regulator		245.585	39.7202	-2.62828	9.71691	0	0
VBICloDif38397_0874	CD0836	1013096	1013590	495	+	19439963	126698416	COG1246E	core	Putative acetyltransferase	acetyltransferase		152.923	26.5978	-2.52343	8.70095	0	0
VBICloDif38397_0878	CD0840	1015654	1016538	885	+	19439971	126698420	COG0179Q	core	Fumarylacetoacetate hydrolase family protein	isomerase/hydrolase		61.4647	453.129	2.88209	-12.0798	0	0
VBICloDif38397_0883	CD0845	1021334	1021687	354	-	19439981	126698425	-	core	putative nuclease	nuclease		2.08701	11.3967	2.4491	-2.32233	0.0202151	0.0367698
VBICloDif38397_0891	CD0853	1028468	1029454	987	+	19439997	126698433	COG0601EP	core	Oligopeptide transport system permease protein OppB (TC 3.A.1.5.1)	ABC transporter oligopeptide-family permease	oppB	316.197	1765.19	2.48093	-10.1586	0	0
VBICloDif38397_0892	CD0854	1029438	1030349	912	+	19439999	126698434	COG1173EP	core	Oligopeptide transport system permease protein oppC (TC 3.A.1.5.1)	ABC transporter oligopeptide-family permease	oppC	526.028	1584.04	1.5904	-6.69908	2.09734e-11	1.16716e-10
VBICloDif38397_0893	CD0855	1030462	1032030	1569	+	19440001	126698435	COG0747E	core	Oligopeptide ABC transporter, periplasmic oligopeptide-binding protein OppA (TC 3.A.1.5.1)	ABC transporter oligopeptide-family extracellular solute-binding protein	oppA	1369.17	6569.7	2.26252	-8.4113	0	0
VBICloDif38397_0894	CD0856	1032105	1033130	1026	+	19440003	126698436	COG0444EP	core	Oligopeptide transport ATP-binding protein OppD (TC 3.A.1.5.1)	ABC transporter ATP-binding protein	oppD	704.684	3155.51	2.16283	-8.70057	0	0
VBICloDif38397_0901	CD0862	1038404	1039693	1290	+	19440017	126698439	COG1455G	core	PTS system, cellobiose-specific IIC component (EC 2.7.1.69)	PTS system lactose/cellobiose-family transporter subunit IIC		1.11697	4.26579	1.93322	-3.39933	0.0006755	0.00162632
VBICloDif38397_0904	CD0865	1041845	1042699	855	+	19440023	126698442	COG2110R	core	COG2110, Macro domain, possibly ADP-ribose binding module	hypothetical protein		127.956	1600.27	3.64459	-14.9562	0	0
VBICloDif38397_0905	CD0866	1043012	1043884	873	+	19440025	126698443	COG1073R	core	FIG00514005: hypothetical protein	hypothetical protein		48.9793	735.94	3.90934	-15.5301	0	0
VBICloDif38397_0906	CD0867	1044087	1044536	450	+	19440027	126698444	-	core	FIG00515215: hypothetical protein	hypothetical protein		1.30396	11.6959	3.16502	-3.044	0.00233455	0.00514353
VBICloDif38397_0912	CD0873	1049252	1050274	1023	-	19440039	126698450	COG2984R	core	ABC transporter substrate-binding protein	ABC transporter sugar-family extracellular solute-binding protein		2163.12	297.148	-2.86386	14.3056	0	0
VBICloDif38397_0913	CD0874	1050405	1051160	756	-	19440041	126698451	COG1101R	shared	Methionine ABC transporter ATP-binding protein	ABC transporter sugar-family ATP-binding protein		1107.19	142.499	-2.95788	14.1274	0	0
VBICloDif38397_0921	CD0882	1060468	1061628	1161	+	19440057	126698459	COG0448G	core	Glucose-1-phosphate adenylyltransferase (EC 2.7.7.27)	glucose-1-phosphate adenylyltransferase	glgC	40.3234	273.73	2.76307	-11.7024	0	0
VBICloDif38397_0922	CD0883	1061630	1062760	1131	+	19440059	126698460	COG0448G	core	Glycogen biosynthesis protein GlgD, glucose-1-phosphate adenylyltransferase family	glycogen biosynthesis protein	glgD	15.7908	189.028	3.58145	-12.8717	0	0
VBICloDif38397_0923	CD0884	1062789	1064231	1443	+	19440061	126698461	COG0297G	core	Glycogen synthase, ADP-glucose transglucosylase (EC 2.4.1.21)	glycogen synthase (Starch [bacterial glycogen] synthase)	glgA	34.8591	229.12	2.7165	-11.4237	0	0
VBICloDif38397_0924	CD0885	1064245	1066665	2421	+	19440063	126698462	COG0058G	core	Glycogen phosphorylase (EC 2.4.1.1)	glycogen phosphorylase	glgP	57.125	386.58	2.75857	-11.5924	0	0
VBICloDif38397_0925	CD0886	1066670	1068535	1866	+	19440065	126698463	COG0366G	core	Neopullulanase (EC 3.2.1.135)	alpha-amylase		31.7389	151.944	2.25921	-9.84181	0	0
VBICloDif38397_0933	CD0894	1076412	1077908	1497	+	19440081	126698471	COG4624R	core	Periplasmic [Fe] hydrogenase (EC 1.12.7.2)	iron-dependent hydrogenase		333.27	27.9543	-3.57555	16.2954	0	0
VBICloDif38397_0934	CD0895	1078053	1078967	915	+	19440083	126698472	COG2333R	core	FIG00526683: hypothetical protein	metallo-beta-lactamase superfamily exported protein		602.918	56.8692	-3.40624	15.7009	0	0
VBICloDif38397_0936	CD0897	1079499	1079849	351	+	19440087	126698474	-	core	FIG00518576: hypothetical protein	hypothetical protein		10.7799	43.5441	2.01414	-3.88747	0.000101294	0.000277077
VBICloDif38397_0939	CD0900	1083366	1084502	1137	+	19440093	126698477	COG1125E	core	glycine betaine/L-proline transport, ATP-binding protein	ABC transporter glycine betaine/carnitine/choline ATP-binding protein	opuCA	213.62	617.903	1.53233	-6.91973	4.52505e-12	2.67293e-11
VBICloDif38397_0940	CD0901	1084495	1086042	1548	+	19440095	126698478	COG1732M	core	L-proline glycine betaine binding ABC transporter protein ProX (TC 3.A.1.12.1) / Osmotic adaptation	ABC transporter glycine betaine/carnitine/choline permease	opuCC	86.22	321.143	1.89712	-8.59441	0	0
VBICloDif38397_0941	CD0902	1086376	1087242	867	+	19440097	126698479	COG0053P	core	Cobalt-zinc-cadmium resistance protein	cation efflux protein		1.09782	4.01389	1.87036	-2.44232	0.0145934	0.0275447
VBICloDif38397_0945	CD0906	1091736	1093184	1449	-	19440105	126698482	-	unique	FIG00519388: hypothetical protein	DNA-binding protein		2.94317	9.25687	1.65316	-4.12306	3.73871e-05	0.000110148
VBICloDif38397_0988	CD0942	1112324	1112551	228	+	19440191	126698522	-	unique	hypothetical protein	hypothetical protein		2254.33	15341.6	2.76668	-11.644	0	0
VBICloDif38397_0991	CD0945	1114550	1115989	1440	+	19440197	126698525	-	core	Phage portal protein	portal protein		0.99296	3.40759	1.77894	-3.15456	0.00160738	0.00361991
VBICloDif38397_1016	CD0965	1133954	1134571	618	+	19440247	126698549	-	core	Phage baseplate	hypothetical protein		1.26104	5.13589	2.026	-2.28042	0.0225826	0.0405984
VBICloDif38397_1040	CD0989	1152981	1154723	1743	+	19440295	126698573	COG0119E	core	2-isopropylmalate synthase (EC 2.3.3.13)	2-isopropylmalate synthase	leuA	2.24608	0.604766	-1.89296	2.76816	0.00563739	0.0116414
VBICloDif38397_1041	CD0990	1154680	1155957	1278	+	19440297	126698574	COG0065E	core	3-isopropylmalate dehydratase large subunit (EC 4.2.1.33)	3-isopropylmalate dehydratase large subunit	leuC	2.45835	0.613018	-2.00369	2.47889	0.0131791	0.0251151
VBICloDif38397_1046	CD0995	1160107	1161048	942	+	19440307	126698579	COG0111HE	core	D-3-phosphoglycerate dehydrogenase (EC 1.1.1.95)	D-3-phosphoglycerate dehydrogenase	serA	442.637	148.979	-1.57101	7.67172	1.68754e-14	1.18595e-13
VBICloDif38397_1049	CD0998	1166882	1168816	1935	+	19440313	126698582	COG1032C	core	Fe-S OXIDOREDUCTASE (1.8.-.-)	hypothetical protein		150.951	33.8373	-2.15739	10.04	0	0
VBICloDif38397_1052	CD1001	1170662	1171360	699	+	19440319	126698585	COG1116P	core	Alkanesulfonates ABC transporter ATP-binding protein / Sulfonate ABC transporter, ATP-binding subunit SsuB	ABC transporter nitrate/sulfonate/taurine ATP-binding protein		0.807322	4.62769	2.51907	-2.48253	0.0130453	0.0249136
VBICloDif38397_1060	CD1009	1177160	1177894	735	+	19440335	126698593	COG2188K	core	Predicted transcriptional regulator of N-Acetylglucosamine utilization, GntR family	GntR family transcriptional regulator		71.7004	208.388	1.53922	-6.4551	1.08148e-10	5.71435e-10
VBICloDif38397_1064	CD1013	1180992	1181696	705	+	19440343	126698597	COG0745TK	core	Two-component system response regulator QseB	two-component response regulator		7.28249	21.6209	1.56992	-4.12357	3.73047e-05	0.000109996
VBICloDif38397_1079	CD1027	1198428	1199480	1053	+	19440373	126698611	COG0687E	core	ABC transporter, periplasmic spermidine putrescine-binding protein PotD (TC 3.A.1.11.1)	ABC transporter spermidine/putrescine solute-binding protein	potD	190.954	57.79	-1.72433	7.82212	5.10703e-15	3.72143e-14
VBICloDif38397_1084	CD1032	1205670	1206743	1074	+	19440383	126698616	-	core	probable enzyme with TIM-barrel fold	hypothetical protein		1.77647	7.06511	1.9917	-4.03134	5.54601e-05	0.000158661
VBICloDif38397_1099	CD1047	1240572	1241624	1053	+	19440421	126698631	COG2247M	core	N-acetylmuramoyl-L-alanine amidase (EC 3.5.1.28)	cell wall-binding protein		298.325	98.3437	-1.60098	7.60814	2.77556e-14	1.91648e-13
VBICloDif38397_1106	CD1054	1246920	1248056	1137	+	19440435	126698638	COG1960I	core	Butyryl-CoA dehydrogenase (EC 1.3.99.2)	butyryl-CoA dehydrogenase	bcd2	832.907	203.273	-2.03474	10.298	0	0
VBICloDif38397_1107	CD1055	1248115	1248897	783	+	19440437	400927322	-	core	Electron transfer flavoprotein, beta subunit	electron transfer flavoproteins subunit beta	etfB2	728.921	175.173	-2.05699	10.0605	0	0
VBICloDif38397_1108	CD1056	1248916	1249926	1011	+	19440439	126698640	COG2025C	core	Electron transfer flavoprotein, alpha subunit	electron transfer flavoprotein subunit alpha	etfA2	326.066	109.504	-1.57418	7.49796	6.4837e-14	4.40001e-13
VBICloDif38397_1109	CD1057	1249945	1250742	798	+	19440441	126698641	COG1024I	core	3-hydroxybutyryl-CoA dehydratase (EC 4.2.1.55)	3-hydroxybutyryl-CoA dehydratase	crt2	681.279	184.329	-1.88596	9.22714	0	0
VBICloDif38397_1111	CD1059	1251772	1252947	1176	+	19440445	126698643	COG0183I	core	Acetyl-CoA acetyltransferase (EC 2.3.1.9)	acetoacetyl-CoA thiolase 1	thlA1	949.825	216.837	-2.13105	10.8013	0	0
VBICloDif38397_1121	CD1067	1260265	1261482	1218	+	19440465	126698654	-	core	FIG00516933: hypothetical protein	hypothetical protein		21.7018	94.7115	2.12573	-8.12786	4.44089e-16	3.433e-15
VBICloDif38397_1133	CD1079	1271362	1272267	906	-	19440489	126698666	COG0583K	core	LysR-family transcriptional regulator	LysR family transcriptional regulator		42.563	159.048	1.90179	-7.63029	2.33147e-14	1.62245e-13
VBICloDif38397_1138	CD1084	1275960	1277660	1701	+	19440499	126698671	COG1132V	core	ABC transporter, ATP-binding protein/permease protein	ABC transporter multidrug-family ATP-binding/permease		190.211	52.7179	-1.85124	8.75219	0	0
VBICloDif38397_1139	CD1085	1278023	1279210	1188	+	19440501	126698672	COG0786E	core	membrane protein, putative	membrane protein		180.408	29.4542	-2.61472	11.382	0	0
VBICloDif38397_1140	CD1086	1279270	1280433	1164	+	19440503	400927323	-	core	Catalyzes the cleavage of p-aminobenzoyl-glutamate to p-aminobenzoate and glutamate, subunit A	"peptidase, M20D family"		482.35	53.8454	-3.16318	14.8634	0	0
VBICloDif38397_1186	CD1129	1329231	1329833	603	+	19440597	126698723	COG0237H	core	Dephospho-CoA kinase (EC 2.7.1.24)	dephospho-CoA kinase	coaE	200.554	69.621	-1.5264	6.40484	1.50526e-10	7.84855e-10
VBICloDif38397_1193	CD1136	1335296	1336240	945	+	19440611	126698730	-	core	FIG00514311: hypothetical protein	hypothetical protein		8.70396	25.8045	1.56788	-4.61091	4.00903e-06	1.34238e-05
VBICloDif38397_1194	CD1137	1336456	1337793	1338	+	19440613	126698731	COG4656C	core	Electron transport complex protein RnfC	electron transport complex protein	rnfC	544.787	1683.59	1.62778	-6.74601	1.51967e-11	8.53706e-11
VBICloDif38397_1195	CD1138	1337816	1338793	978	+	19440615	126698732	COG4658C	core	Electron transport complex protein RnfD	electron transport complex protein	rnfD	184.982	899.903	2.28239	-9.99736	0	0
VBICloDif38397_1197	CD1140	1339375	1339968	594	+	19440619	126698734	COG4660C	core	Electron transport complex protein RnfE	electron transport complex protein	rnfE	136.032	547.956	2.01011	-8.82992	0	0
VBICloDif38397_1198	CD1141	1339983	1340558	576	+	19440621	126698735	COG4657C	core	Electron transport complex protein RnfA	electron transport complex protein	rnfA	81.7654	526.943	2.68808	-10.7822	0	0
VBICloDif38397_1219	CD1161	1361218	1361529	312	+	19440663	126698756	COG0261J	core	LSU ribosomal protein L21p	50S ribosomal protein L21	rplU	12032.1	2352.36	-2.35471	11.7174	0	0
VBICloDif38397_1220	CD1162	1361583	1361861	279	+	19440665	126698757	COG2868J	core	FIG139598: Potential ribosomal protein	ribosome-associated protein		11046.4	2528.63	-2.12715	10.6029	0	0
VBICloDif38397_1221	CD1163	1361875	1362165	291	+	19440667	126698758	COG0211J	core	LSU ribosomal protein L27p	50S ribosomal protein L27	rpmA	49531.7	9221.18	-2.42533	10.6243	0	0
VBICloDif38397_1222	CD1164	1362276	1363553	1278	+	19440669	126698759	COG0536R	core	COG0536: GTP-binding protein Obg	GTPase CgtA	obg	294.43	71.7062	-2.03775	9.68103	0	0
VBICloDif38397_1226	CD1168	1366526	1367785	1260	-	19440677	126698763	COG3314S	core	FIGfam003972: membrane protein	membrane protein		0.514496	3.11009	2.59572	-3.04367	0.00233713	0.00514603
VBICloDif38397_1228	CD1170	1368741	1370015	1275	+	19440681	126698765	COG3875S	core	Novel D-mannonate dehydrogenase (EC 1.1.1.57)	hypothetical protein		6.62528	1.66535	-1.99216	3.98965	6.61713e-05	0.00018675
VBICloDif38397_1234	CD1176	1376750	1377274	525	+	19440693	126698771	COG1399R	core	COG1399 protein, clustered with ribosomal protein L32p	hypothetical protein		5786.07	1278.44	-2.1782	10.4772	0	0
VBICloDif38397_1235	CD1176A	1377299	1377475	177	+	19440695	126698772	COG0333J	core	LSU ribosomal protein L32p	50S ribosomal protein L32	rpmF	2498.67	497.956	-2.32707	2.36315	0.0181204	0.0332659
VBICloDif38397_1236	CD1177	1377682	1378239	558	+	19440697	126698773	COG1349KG	core	Phosphate:acyl-ACP acyltransferase PlsX	fatty acid biosynthesis transcriptional regulator	fapR	2133.12	206.237	-3.37059	16.2966	0	0
VBICloDif38397_1237	CD1178	1378250	1379272	1023	+	19440699	126698774	COG0416I	core	Phosphate:acyl-ACP acyltransferase PlsX	phosphate acyltransferase	plsX	1055.35	118.833	-3.15072	15.4757	0	0
VBICloDif38397_1238	CD1179	1379298	1380284	987	+	19440701	126698775	COG0332I	core	3-oxoacyl-[acyl-carrier-protein] synthase, KASIII (EC 2.3.1.41)	3-oxoacyl-ACP synthase	fabH	1152.72	93.4015	-3.62546	17.5158	0	0
VBICloDif38397_1239	CD1180	1380393	1381322	930	+	19440703	126698776	COG2070R	core	Enoyl-[acyl-carrier-protein] reductase [FMN] (EC 1.3.1.9)	enoyl-(Acyl-carrier-protein) reductase II	fabK	1100.03	79.1142	-3.79746	17.9942	0	0
VBICloDif38397_1240	CD1181	1381338	1382288	951	+	19440705	126698777	COG0331I	core	Malonyl CoA-acyl carrier protein transacylase (EC 2.3.1.39)	malonyl CoA-acyl carrier protein transacylase	fabD	1487.55	105.379	-3.81928	18.4838	0	0
VBICloDif38397_1241	CD1182	1382288	1383037	750	+	19440707	126698778	COG1028IQR	core	3-oxoacyl-[acyl-carrier protein] reductase (EC 1.1.1.100)	3-oxoacyl-ACP reductase	fabG	1576.29	118.281	-3.73624	17.8736	0	0
VBICloDif38397_1242	CD1183	1383091	1383315	225	+	19440709	126698779	COG0236IQ	core	Acyl carrier protein	acyl carrier protein (ACP)	acpP	2092.87	188.668	-3.47156	12.0445	0	0
VBICloDif38397_1243	CD1184	1383344	1384582	1239	+	19440711	126698780	COG0304IQ	core	3-oxoacyl-[acyl-carrier-protein] synthase, KASII (EC 2.3.1.41)	3-oxoacyl-ACP synthase	fabF	3094.46	204.297	-3.92095	19.5113	0	0
VBICloDif38397_1250	CD1191	1392082	1394067	1986	+	19440725	126698787	COG3855G	core	Fructose-1,6-bisphosphatase, Bacillus type (EC 3.1.3.11)	"fructose-1,6-bisphosphatase"	fbp	420.136	1277.22	1.60407	-6.51522	7.25831e-11	3.89299e-10
VBICloDif38397_1267	CD1208	1406560	1407372	813	+	19440759	126698804	COG1189J	core	RNA binding methyltransferase FtsJ like	RNA-binding S4-domain-containing protein		320.695	80.8903	-1.98716	9.10002	0	0
VBICloDif38397_1269	CD1210	1409285	1410151	867	+	19440763	126698806	-	core	FIG00512787: hypothetical protein	hypothetical protein		38.2288	13.3105	-1.5221	5.06513	4.0813e-07	1.52683e-06
VBICloDif38397_1270	CD1211	1410244	1410735	492	-	19440765	126698807	-	core	putative acetyltransferase	N-acetyltransferase		100.747	339.814	1.754	-7.0432	1.87872e-12	1.14987e-11
VBICloDif38397_1271	CD1212	1410796	1411236	441	-	19440767	126698808	COG0456R	core	Spermine/spermidine acetyltransferase (EC 2.3.1.57)	diamine N-acetyltransferase	bltD	7.98642	49.4077	2.62912	-5.70787	1.144e-08	4.99148e-08
VBICloDif38397_1280	CD1221	1419074	1419679	606	+	19440785	126698817	-	core	Stage II sporulation protein M (SpoIIM)	membrane protein		5.1884	18.0503	1.79866	-4.08147	4.47516e-05	0.000130014
VBICloDif38397_1286	CD1227	1425671	1426345	675	+	19440797	126698823	COG4122R	core	FIG011945: O-methyltransferase family protein	O-methyltransferase		256.912	50.0283	-2.36046	9.99312	0	0
VBICloDif38397_1287	CD1228	1426332	1427579	1248	+	19440799	126698824	COG0826O	core	peptidase, U32 family large subunit [C1]	U32 family peptidase		464.921	83.4409	-2.47816	12.0177	0	0
VBICloDif38397_1289	CD1230	1429412	1429696	285	-	19440803			core	RNA polymerase sporulation specific sigma factor SigK		sigK	34.3413	111.031	1.69294	-4.20209	2.64462e-05	7.96973e-05
VBICloDif38397_1291	CD1232	1431361	1432182	822	-	19440807	126698828	COG3063NU	core	putative lipoprotein	lipoprotein		17.0127	113.383	2.73652	-8.52028	0	0
VBICloDif38397_1292	CD1233	1432373	1433800	1428	+	19440809	126698829	COG2247M	core	cell surface protein	cell surface protein		6.80378	45.1336	2.72979	-8.82166	0	0
VBICloDif38397_1302	CD1240	1443026	1443535	510	+	19440829	126698836	-	core	Teicoplanin resistance protein	Teicoplanin resistance protein	vanZ	128.937	32.9046	-1.9703	7.02016	2.21623e-12	1.34486e-11
VBICloDif38397_1317	CD1252	1456109	1457461	1353	+	19440859	126698849	COG0541U	core	Signal recognition particle, subunit Ffh SRP54 (TC 3.A.5.1.1)	signal recognition particle protein	ffh	1686.95	371.826	-2.18172	10.5406	0	0
VBICloDif38397_1319	CD1254	1457836	1458063	228	+	19440863	126698851	COG1837R	core	KH domain RNA binding protein YlqC	RNA-binding protein		701.645	230.529	-1.60579	5.41285	6.20304e-08	2.49243e-07
VBICloDif38397_1320	CD1255	1458171	1458686	516	+	19440865	126698852	COG0806J	core	16S rRNA processing protein RimM	16S rRNA-processing protein RimM	rimM	327.558	60.1713	-2.4446	10.0573	0	0
VBICloDif38397_1321	CD1256	1458695	1459390	696	+	19440867	126698853	COG0336J	core	tRNA (Guanine37-N1) -methyltransferase (EC 2.1.1.31)	transfer RNA (guanine-N(1)-)-methyltransferase (M1G-methyltransferase) (tRNA [GM37] methyltransferase )	trmD	162.383	43.4277	-1.90272	7.71765	1.17684e-14	8.38643e-14
VBICloDif38397_1322	CD1257	1459575	1459925	351	+	19440869	126698854	COG0335J	core	LSU ribosomal protein L19p	50S ribosomal protein L19	rplS	3416.86	628.127	-2.44354	11.9711	0	0
VBICloDif38397_1324	CD1259	1461531	1462823	1293	+	19440873	126698856	COG1114E	core	Branched-chain amino acid transport system carrier protein	Branched chain amino acid transport system carrier protein		2.12365	49.5988	4.54569	-11.5372	0	0
VBICloDif38397_1325	CD1260	1463942	1465234	1293	+	19440875	126698857	COG1114E	core	Branched-chain amino acid transport system carrier protein	Branched chain amino acid transport system carrier protein		537.04	27743.3	5.69097	-22.8071	0	0
VBICloDif38397_1329	CD1264	1469972	1470220	249	+	19440883	126698861	-	core	FIG00516385: hypothetical protein	hypothetical protein		4203.87	16625.8	1.98363	-8.55022	0	0
VBICloDif38397_1330	CD1265	1470396	1470893	498	-	19440885	126698862	COG1329K	core	putative regulatory protein	CarD family transcriptional regulator		36.92	173.877	2.23559	-7.48395	7.21645e-14	4.88794e-13
VBICloDif38397_1331	CD1266	1471137	1472201	1065	-	19440887	400927332	-	core	Export ABC transporter permease	ABC transporter multidrug-family permease		2.82414	9.18398	1.70131	-3.97397	7.06844e-05	0.000199013
VBICloDif38397_1332	CD1267	1472204	1473301	1098	-	19440889	126698864	-	core	Streptolysin S export transmembrane permease (SagH)	ABC transporter multidrug-family permease		0.693803	3.3778	2.28349	-2.97364	0.00294286	0.00635
VBICloDif38397_1333	CD1268	1473315	1474250	936	-	19440891	126698865	COG1131V	core	ABC-type multidrug transport system, ATPase component	ABC transporter multidrug-family ATP-binding protein		4.27099	12.433	1.54153	-3.91632	8.99123e-05	0.000248044
VBICloDif38397_1338	CD1273	1478361	1479461	1101	+	19440901	126698870	COG0758LU	core	Rossmann fold nucleotide-binding protein Smf possibly involved in DNA uptake	DNA processing Smf single strand binding protein		78.0911	18.61	-2.06908	8.17097	2.22045e-16	1.72777e-15
VBICloDif38397_1339	CD1274	1479494	1481581	2088	+	19440903	126698871	COG0550L	core	DNA topoisomerase I (EC 5.99.1.2)	DNA topoisomerase I	topA	414.934	125.739	-1.72245	8.6809	0	0
VBICloDif38397_1340	CD1275	1481746	1482531	786	+	19440905	126698872	COG4465K	core	GTP-sensing transcriptional pleiotropic repressor codY	transcriptional repressor CodY	codY	988.49	323.038	-1.61352	8.05735	8.88178e-16	6.76309e-15
VBICloDif38397_1343	CD1278	1484813	1485259	447	+	19440911	126698875	COG1959K	core	Iron-sulfur cluster regulator IscR	Rrf2 family transcriptional regulator		1395.58	41.564	-5.06939	20.0667	0	0
VBICloDif38397_1344	CD1279	1485277	1486470	1194	+	19440913	126698876	COG1104E	core	Cysteine desulfurase (EC 2.8.1.7)	cysteine desulfurase	iscS2	4029.08	332.997	-3.59687	17.6066	0	0
VBICloDif38397_1345	CD1280	1486524	1486964	441	+	19440915	126698877	COG0822C	core	Iron-sulfur cluster assembly scaffold protein IscU/NifU-like	NifU-like protein		4198.68	235.721	-4.15478	19.7718	0	0
VBICloDif38397_1350	CD1285	1494089	1494514	426	+	19440925	126698882	COG0816L	core	Putative Holliday junction resolvase YggF	Holliday junction resolvase-like protein		358.352	112.677	-1.66918	6.9603	3.39551e-12	2.03616e-11
VBICloDif38397_1356	CD1291	1498827	1499990	1164	+	19440937	126698888	COG1686M	core	D-alanyl-D-alanine carboxypeptidase (EC 3.4.16.4)	D-alanyl-D-alanine carboxypeptidase	dacF	1.10526	3.17542	1.52256	-2.4386	0.0147441	0.0277701
VBICloDif38397_1369	CD1303	1508775	1509512	738	-	19440963	126698901	COG0846K	core	NAD-dependent protein deacetylase of SIR2 family	NAD-dependent deacetylase		74.1296	271.185	1.87115	-7.92128	2.44249e-15	1.80948e-14
VBICloDif38397_1372	CD1306	1516267	1516728	462	+	19440969	126698904	COG0779S	core	FIG000325: clustered with transcription termination protein NusA	hypothetical protein		213.268	49.4757	-2.10787	7.96121	1.77636e-15	1.32704e-14
VBICloDif38397_1376	CD1309	1518523	1520463	1941	+	19440977	126698908	COG0532J	core	Translation initiation factor 2	translation initiation factor IF-2	infB	989.356	254.427	-1.95924	9.45327	0	0
VBICloDif38397_1377	CD1310	1520506	1520886	381	+	19440979	126698909	COG0858J	core	Ribosome-binding factor A	ribosome-binding factor A	rbfA	755.748	228.22	-1.72748	7.67458	1.66533e-14	1.17266e-13
VBICloDif38397_1383	CD1316	1525816	1526073	258	+	19440991	126698915	COG0184J	core	SSU ribosomal protein S15p (S13e)	30S ribosomal protein S15	rpsO	8923.3	1888.61	-2.24026	11.1856	0	0
VBICloDif38397_1388	CD1321	1531845	1532090	246	+	19441001	126698920	COG1873S	core	FIG007697: hypothetical protein	sporulation protein		354.7	104.543	-1.7625	5.41699	6.06091e-08	2.43808e-07
VBICloDif38397_1389	CD1322	1532100	1533323	1224	+	19441003	126698921	COG0527E	core	Aspartokinase (EC 2.7.2.4)	aspartate kinase I	dapG	545.47	174.21	-1.64667	8.28931	2.22045e-16	1.72777e-15
VBICloDif38397_1391	CD1324	1534293	1536704	2412	+	19441007	126698923	COG1674D	core	Cell division protein FtsK	DNA FtsK/SpoIIIE translocase	ftsK	197.881	45.5517	-2.11906	10.3483	0	0
VBICloDif38397_1392	CD1325	1536707	1537765	1059	+	19441009	126698924	COG2603R	core	Selenophosphate-dependent tRNA 2-selenouridine synthase	tRNA 2-selenouridine synthase		178.66	41.0559	-2.12156	9.35095	0	0
VBICloDif38397_1393	CD1326	1537759	1539093	1335	+	19441011	126698925	COG0621J	core	Ribosomal protein S12p Asp88 (E. coli) methylthiotransferase	30S ribosomal protein S12 methylthiotransferase		388.476	86.5837	-2.16566	10.528	0	0
VBICloDif38397_1400	CD1333	1546822	1547730	909	+	19441025	126698932	COG4974L	core	Tyrosine recombinase XerC	tyrosine recombinase	xerD2	43.082	131.623	1.61125	-6.44407	1.16315e-10	6.12764e-10
VBICloDif38397_1406	CD1339	1554562	1555758	1197	-	19441037	126698938	COG0436E	core	Aspartate aminotransferase (EC 2.6.1.1)	aspartate aminotransferase		572.653	2736.34	2.25651	-9.02966	0	0
VBICloDif38397_1421	CD1353	1569536	1570357	822	-	19441067	126698952	COG2240H	core	Pyridoxal kinase (EC 2.7.1.35)	phosphomethylpyrimidine kinase		82.8488	259.274	1.64593	-7.22556	4.99156e-13	3.18671e-12
VBICloDif38397_1460	CD1389	1607849	1608916	1068	+	19441145	126698991	COG4948MR	core	L-alanine-DL-glutamate epimerase	chloromuconate cycloisomerase		6.4328	24.046	1.90228	-5.58037	2.40009e-08	1.00883e-07
VBICloDif38397_1462	CD1391	1610108	1612204	2097	+	19441149	126698993	COG2936R	core	FIG00514348: hypothetical protein	CocE/NonD family hydrolase		7.99877	24.3243	1.60455	-5.62109	1.89757e-08	8.09086e-08
VBICloDif38397_1466	CD1395	1615482	1615925	444	-	19441157	126698997	-	core	FIG00518930: hypothetical protein	membrane protein		5.80899	18.8291	1.69661	-3.23214	0.00122867	0.00281156
VBICloDif38397_1468	CD1397	1617309	1617785	477	-	19441161	126698999	COG1720S	core	COG1720: Uncharacterized conserved protein	hypothetical protein		19.1119	55.7157	1.54361	-4.43642	9.14684e-06	2.93823e-05
VBICloDif38397_1472	CD1401	1620994	1621629	636	-	19441169	126699003	COG1335Q	core	Nicotinamidase (EC 3.5.1.19)	isochorismatase		12.1673	58.0042	2.25315	-6.44284	1.17258e-10	6.16817e-10
VBICloDif38397_1476	CD1404A	1627286	1627633	348	+	19441177	126699007	-	core	FIG00515325: hypothetical protein	hypothetical protein		257.019	1267.15	2.30164	-9.84073	0	0
VBICloDif38397_1485	CD1413	1638033	1638977	945	+	19441195	126699016	COG0697GER	core	Permease of the drug/metabolite transporter (DMT) superfamily	membrane protein		13.5683	71.7357	2.40245	-7.99376	1.33227e-15	1.00372e-14
VBICloDif38397_1505	CD1433	1662517	1664646	2130	-	19441235	126699037	COG0450O	core	Alkyl hydroperoxide reductase subunit C-like protein	bifunctional protein: peroxiredoxin/chitinase		2.75721	13.4854	2.29012	-6.69916	2.09623e-11	1.16716e-10
VBICloDif38397_1519	CD1447	1678071	1678814	744	+	19441263	126699051	COG0115EH	core	Aminodeoxychorismate lyase (EC 4.1.3.38)	aminodeoxychorismate lyase (4-amino-4-deoxychorismate lyase) (ADC lyase) (ADCL)	pabC	4.30874	12.9958	1.59271	-3.8283	0.000129033	0.000346296
VBICloDif38397_1520	CD1448	1678848	1679549	702	+	19441265	126699052	-	core	FIG00522733: hypothetical protein	hypothetical protein		43.0892	159.878	1.89158	-7.00255	2.51354e-12	1.51494e-11
VBICloDif38397_1531	CD1459	1688532	1688999	468	-	19441287	126699063	COG3467R	core	Pyridoxamine 5'-phosphate oxidase-related, FMN-binding	FMN-binding protein		70.5905	537.302	2.92819	-10.1847	0	0
VBICloDif38397_1532	CD1460	1689385	1689861	477	-	19441289	126699064	COG1418R	core	HD family hydrolase, diverged	"phosphohydrolase, HD superfamily"		58.2337	184.207	1.6614	-5.93419	2.95306e-09	1.36911e-08
VBICloDif38397_1533	CD1461	1689981	1691072	1092	-	19441291	126699065	COG4194R	core	FIG00518847: hypothetical protein	membrane protein		1.699	11.0367	2.69954	-5.51813	3.4263e-08	1.41181e-07
VBICloDif38397_1534	CD1462	1691065	1691454	390	-	19441293	126699066	COG1725K	core	Transcriptional regulator, GntR family	GntR family transcriptional regulator		14.4435	50.9121	1.81759	-4.54624	5.46124e-06	1.7965e-05
VBICloDif38397_1556	CD1484	1719626	1720618	993	+	19441337	126699088	COG0715P	core	Alkanesulfonates-binding protein	ABC transporter alkanesulfonates-family extracellular solute-binding protein	ssuA	200.743	977.623	2.28393	-9.98251	0	0
VBICloDif38397_1557	CD1485	1720716	1721312	597	-	19441339	126699089	-	core	FIG00515054: hypothetical protein	hypothetical protein		3.11251	21.0863	2.76015	-5.10979	3.22517e-07	1.21748e-06
VBICloDif38397_1561	CD1489	1724351	1725316	966	+	19441347	126699093	COG1135P	core	Methionine ABC transporter ATP-binding protein	ABC transporter methionine-specific ATP-binding protein	metN	162.32	31.9758	-2.34379	9.92007	0	0
VBICloDif38397_1562	CD1490	1725309	1725965	657	+	19441349	126699094	COG2011P	core	Methionine ABC transporter permease protein	ABC transporter methionine-specific permease	metI	169.307	29.8539	-2.50366	9.7234	0	0
VBICloDif38397_1563	CD1491	1726001	1726792	792	+	19441351	126699095	COG1464P	core	Methionine ABC transporter substrate-binding protein	ABC transporter methionine-specific substrate-binding lipoprotein	metQ	255.737	86.1213	-1.57022	7.10459	1.20681e-12	7.4894e-12
VBICloDif38397_1564	CD1492	1727624	1729678	2055	+	19441353	126699096	COG0642T	core	FIG00519132: hypothetical protein	"two-component sensor histidine kinase,sporulation-associated spo0A"		21.7992	72.8	1.73966	-7.38795	1.49214e-13	9.88091e-13
VBICloDif38397_1565	CD1493	1729787	1730395	609	+	19441355	126699097	COG2094L	core	DNA-3-methyladenine glycosylase II (EC 3.2.2.21)	3-methyladenine DNA glycosylase		49.6094	176.672	1.83239	-6.89591	5.35194e-12	3.14051e-11
VBICloDif38397_1569	CD1497	1734230	1734706	477	+	19441363	126699101	-	core	FIG00515703: hypothetical protein	hypothetical protein		1225.15	227.748	-2.42744	11.4957	0	0
VBICloDif38397_1570	CD1498	1734997	1735881	885	+	19441365	126699102	COG0568K	core	RNA polymerase sigma factor RpoD	RNA polymerase sigma factor SigA2 (sigma-43)	rpoD2	230.71	953.753	2.04754	-9.08209	0	0
VBICloDif38397_1575	CD1503	1740658	1741026	369	+	19441375	126699106	COG1725K	core	Transcriptional regulator, GntR family	GntR family transcriptional regulator		45.9312	12.3575	-1.89409	4.14111	3.4563e-05	0.000102422
VBICloDif38397_1582	CD1509	1746150	1746719	570	+	19441389	126699113	-	core	FIG00513059: hypothetical protein	lipoprotein		1.83263	8.3608	2.18972	-2.88558	0.00390693	0.00828941
VBICloDif38397_1587	CD1513	1751148	1751975	828	-	19441399	126699117	COG0413H	core	3-methyl-2-oxobutanoate hydroxymethyltransferase (EC 2.1.2.11)	3-methyl-2-oxobutanoate hydroxymethyltransferase	panB	86.5818	30.1443	-1.52218	5.9593	2.53328e-09	1.18843e-08
VBICloDif38397_1597	CD1521	1763201	1764409	1209	+	19441419	126699125	COG0162J	core	Tyrosyl-tRNA synthetase (EC 6.1.1.1)	tyrosyl-tRNA ligase	tyrR	678.713	177.688	-1.93345	9.73853	0	0
VBICloDif38397_1604	CD1528	1771536	1772210	675	-	19441433	126699132	COG1136V	core	ABC transporter ATP-binding protein YvcR	ABC transporter ATP-binding protein		724.466	197.576	-1.87451	9.043	0	0
VBICloDif38397_1614	CD1538	1784341	1786560	2220	+	19441453	126699142	COG2200T	core	diguanylate cyclase/phosphodiesterase (GGDEF & EAL domains) with PAS/PAC sensor(s)	signaling protein		18.7848	59.5091	1.66354	-6.87727	6.10112e-12	3.56835e-11
VBICloDif38397_1617	CD1541	1789452	1790843	1392	+	19441459	126699145	COG0534V	core	Multi antimicrobial extrusion protein (Na(+)/drug antiporter), MATE family of MDR efflux pumps	"drug/sodium antiporter, MATE family"		452.605	152.306	-1.57128	7.86611	3.55271e-15	2.61022e-14
VBICloDif38397_1620	CD1545	1793557	1794123	567	-	19441465	126699149	-	core	uncharacterized protein homolog YKRK B. subtilis	hypothetical protein		4.72664	33.8653	2.84092	-6.2289	4.69724e-10	2.35259e-09
VBICloDif38397_1621	CD1546	1794284	1794937	654	+	19441467	126699150	COG1272R	core	COG1272: Predicted membrane protein hemolysin III homolog	channel-forming hemolysin		42.4618	547.136	3.68766	-13.9241	0	0
VBICloDif38397_1631	CD1555	1802619	1803947	1329	+	19441487	400927346	-	core	Amino acid permease	amino acid permease		208.891	40.4241	-2.36946	10.8507	0	0
VBICloDif38397_1636	CD1560	1808016	1808771	756	+	19441497	126699164	-	core	FIG00516788: hypothetical protein	hypothetical protein		11.305	39.3667	1.80001	-5.09317	3.52118e-07	1.32361e-06
VBICloDif38397_1655	CD1580	1831561	1832778	1218	+	19441535	126699183	COG0460E	shared	Homoserine dehydrogenase (EC 1.1.1.3)	Homoserine dehydrogenase	hom2	7.99526	2.33255	-1.77724	3.99598	6.44271e-05	0.000182552
VBICloDif38397_1656	CD1581	1832895	1833377	483	+	19441537	126699184	-	core	FIG00522475: hypothetical protein	hypothetical protein		79.4157	24.555	-1.69341	5.40806	6.37114e-08	2.55708e-07
VBICloDif38397_1659	CD1583A	1836026	1836295	270	-	19441543	126699187	-	core	FIG00514249: hypothetical protein	hypothetical protein		8615.69	2541.02	-1.76156	8.89932	0	0
VBICloDif38397_1661	CD1585	1837866	1838816	951	+	19441547	126699189	COG2971G	core	N-acetylglucosamine kinase of eukaryotic type (EC 2.7.1.59)	N-acetylglucosamine kinase NAGK-like		3.37975	10.9607	1.69735	-4.11119	3.93626e-05	0.000115546
VBICloDif38397_1662	CD1586	1838809	1839993	1185	+	19441549	126699190	-	core	FIG00517058: hypothetical protein	hypothetical protein		0.0711341	8.95557	6.9761	-2.52487	0.0115742	0.0223441
VBICloDif38397_1663	CD1587	1840006	1841502	1497	+	19441551	126699191	COG1129G	core	Ribose ABC transport system, ATP-binding protein RbsA (TC 3.A.1.2.1)	ABC transporter sugar-family ATP-binding protein		0.207641	16.0828	6.27529	-4.97528	6.5152e-07	2.38109e-06
VBICloDif38397_1664	CD1588	1841525	1842475	951	+	19441553	126699192	COG1172G	core	Ribose ABC transport system, permease protein RbsC (TC 3.A.1.2.1)	ABC transporter sugar-family permease		0.806013	16.9216	4.39192	-5.93628	2.91557e-09	1.35349e-08
VBICloDif38397_1665	CD1589	1842496	1843458	963	+	19441555	126699193	COG1879G	core	Ribose ABC transport system, periplasmic ribose-binding protein RbsB (TC 3.A.1.2.1)	ABC transporter sugar-family extracellular solute-binding protein		4.87467	36.4018	2.90063	-7.97465	1.55431e-15	1.16361e-14
VBICloDif38397_1670	CD1594	1849652	1850560	909	+	19441565	126699198	COG0031E	core	Cysteine synthase (EC 2.5.1.47)	O-acetyl-serine thiol-lyase A (O-acetyl-sulfhydrylase)(OAS-TL)	cysM	4048.05	46.6411	-6.43948	29.2539	0	0
VBICloDif38397_1671	CD1595	1850587	1851177	591	+	19441567	400927348	-	core	Serine acetyltransferase (EC 2.3.1.30)	serine acetyltransferase (SAT)	cysA	9932.68	103.507	-6.58438	30.2806	0	0
VBICloDif38397_1681	CD1604	1858287	1859249	963	-	19441587	126699208	COG1131V	core	ABC-type multidrug transport system, ATPase component	ABC transporter multidrug-family ATP-binding protein		1.76708	5.13848	1.53997	-2.81872	0.00482155	0.0100615
VBICloDif38397_1694	CD1617	1873455	1873823	369	+	19441613	126699221	COG1725K	core	Transcriptional regulator, GntR family	GntR family transcriptional regulator		105.348	24.8844	-2.08185	5.95651	2.57679e-09	1.20726e-08
VBICloDif38397_1695	CD1618	1873825	1874550	726	+	19441615	126699222	COG1131V	core	ABC-type multidrug transport system, ATPase component	ABC transporter multidrug-family ATP-binding protein		134.929	33.4061	-2.01402	7.97394	1.55431e-15	1.16361e-14
VBICloDif38397_1698	CD1621	1876973	1877857	885	+	19441621	126699225	COG0668M	core	putative mechanosensitive ion channel protein	"mechanosensitive ion channel protein,MscS family"		181.255	61.0459	-1.57006	6.95111	3.62443e-12	2.1625e-11
VBICloDif38397_1699	CD1622	1878219	1878836	618	+	19441623	126699226	COG3212S	core	FIG00518831: hypothetical protein	hypothetical protein		9.879	141.024	3.83543	-10.9777	0	0
VBICloDif38397_1701	CD1624	1881909	1882610	702	+	19441627	126699228	COG0745TK	core	Vancomycin response regulator VanR	two-component response regulator	vanR	219.046	75.436	-1.53791	6.67984	2.39209e-11	1.32496e-10
VBICloDif38397_1720	CD1643	1905390	1906181	792	+	19441665	126699247	COG0561R	core	FIG00514032: hypothetical protein	hypothetical protein		5.33679	24.2974	2.18676	-5.24014	1.60453e-07	6.22895e-07
VBICloDif38397_1722	CD1645	1907045	1908247	1203	+	19441669	126699249	COG5505S	core	DUF819 domain-containing protein	membrane protein		32.3624	138.27	2.0951	-8.61215	0	0
VBICloDif38397_1723	CD1646	1908323	1909303	981	+	19441671	126699250	COG2355E	core	Microsomal dipeptidase (EC 3.4.13.19)	"peptidase, M19 family"		23.55	117.556	2.31955	-8.62087	0	0
VBICloDif38397_1731	CD1654	1917696	1918682	987	-	19441687	126699258	COG0095H	core	Lipoate-protein ligase A	lipoate-protein ligase	lplA	30.1278	144.623	2.26313	-8.83115	0	0
VBICloDif38397_1732	CD1655	1919217	1920896	1680	+	19441689	126699259	COG1757C	core	Na+/H+ antiporter	Na+/H+ antiporter NhaC-like		222.452	60.7139	-1.87339	9.02641	0	0
VBICloDif38397_1737	CD1660	1929539	1929856	318	-	19441701	126699264	COG3123S	core	conserved hypothetical protein	hypothetical protein		87.0559	698.36	3.00396	-10.3348	0	0
VBICloDif38397_1738	CD1661	1930884	1931993	1110	+	19441703	126699266	COG0675L	core	Mobile element protein	transposase-like protein B	tlpB	8.33673	32.9807	1.98407	-6.16731	6.94615e-10	3.41167e-09
VBICloDif38397_1760	CD1682	1956556	1957524	969	+	19441747	126699288	COG1957F	core	preQ1-regulated inosine-uridine nucleoside hydrolase (EC 3.2.2.1)	"nucleoside hydrolase, IUNH family"	iunH	1256.03	259.947	-2.27258	11.4276	0	0
VBICloDif38397_1761	CD1683	1957526	1958089	564	+	19441749	126699289	-	core	Substrate-specific component STY3230 of queuosine-regulated ECF transporter	membrane protein		3557.2	510.083	-2.80194	14.113	0	0
VBICloDif38397_1770	CD1692	1964732	1965100	369	+	19441767	126699298	COG0640K	core	transcriptional regulator, ArsR family/dinitrogenase iron-molybdenum cofactor family protein	ArsR family transcriptional regulator		130.985	567.752	2.11586	-8.21265	2.22045e-16	1.72777e-15
VBICloDif38397_1787	CD1708	1983453	1984820	1368	+	19441801	126699315	COG2357S	core	FIG00513327: hypothetical protein	hypothetical protein		14.4749	65.0724	2.16849	-7.41731	1.1946e-13	7.95505e-13
VBICloDif38397_1797	CD1717	1991453	1992532	1080	+	19441821	126699324	COG3535S	core	Conservative hypothetical protein probably involved in hydantoin, pyrimidine utilization	hypothetical protein		104.057	27.2777	-1.93159	7.99955	1.33227e-15	1.00372e-14
VBICloDif38397_1800	CD1718	1994869	1995981	1113	+	19441827			core	N-methylhydantoinase (ATP-hydrolyzing) (EC 3.5.2.14)			176.721	47.5503	-1.89395	8.50282	0	0
VBICloDif38397_1799	CD1719	1993576	1994685	1110	+	19441825	126699326	COG0675L	core	Mobile element protein	transposase-like protein B	tlpB	95.3696	29.4793	-1.69383	7.03413	2.00506e-12	1.22299e-11
VBICloDif38397_1802	CD1722	1996834	1997118	285	-	19441831	126699328	-	core	FIG00514138: hypothetical protein	transcriptional regulator		86.0615	23.6992	-1.86053	4.12667	3.68048e-05	0.000108703
VBICloDif38397_1804	CD1724	1998227	1998493	267	-	19441835	126699330	-	core	FIG00516467: hypothetical protein	hypothetical protein		243.449	67.6525	-1.84741	5.5014	3.7679e-08	1.54362e-07
VBICloDif38397_1807	CD1727	2000202	2000456	255	+	19441841	126699333	-	core	FIG00513083: hypothetical protein	hypothetical protein		24.0057	86.5013	1.84935	-3.75162	0.000175696	0.000459394
VBICloDif38397_1818	CD1735	2009558	2010244	687	-	19441863	126699342	COG1011R	core	5'-nucleotidase YjjG (EC 3.1.3.5)	hydrolase		4.01076	12.6607	1.65841	-3.69699	0.000218168	0.000560148
VBICloDif38397_1825	CD1743	2018941	2019648	708	+	19441877	126699349	COG3279KT	unique	two-component response regulator	two-component response regulator		5.85728	1.5294	-1.93726	2.60927	0.00907347	0.0179851
VBICloDif38397_1826	CD1744	2019650	2021008	1359	+	19441879	126699350	COG3290T	unique	FIG00513036: hypothetical protein	two-component sensor histidine kinase		23.6471	5.79773	-2.0281	6.49468	8.32074e-11	4.44941e-10
VBICloDif38397_1827	CD1745	2021098	2021532	435	+	19441881	126699351	-	unique	FIG00521869: hypothetical protein	hypothetical protein		51.9015	6.7776	-2.93693	5.92543	3.11483e-09	1.43662e-08
VBICloDif38397_1829	CD1745A	2022187	2022411	225	-	19441885	126699352	COG1918P	core	putative ferrous iron transport protein A	ferrous iron transport protein		174.5	957.92	2.45668	-7.49973	6.39488e-14	4.34803e-13
VBICloDif38397_1839	CD1754	2032847	2033530	684	+	19441905	126699361	-	core	putative ABC transporter, permease protein	ABC transporter multidrug-family permease		0.550393	4.49376	3.02939	-2.34392	0.0190824	0.0348342
VBICloDif38397_1855	CD1767	2044418	2045434	1017	+	19441937	126699376	COG0057G	core	NAD-dependent glyceraldehyde-3-phosphate dehydrogenase (EC 1.2.1.12)	glyceraldehyde-3-phosphate dehydrogenase	gapA	11.7615	8413.53	9.4825	-27.5254	0	0
VBICloDif38397_1856	CD1768	2045931	2046998	1068	+	19441939	400927361	-	core	FIG00513847: hypothetical protein	membrane protein		1587.22	245.049	-2.69536	13.6169	0	0
VBICloDif38397_1857	CD1769	2047379	2051632	4254	+	19441941	126699378	COG3581S	core	Activator of (R)-2-hydroxyglutaryl-CoA dehydratase	CoA enzyme activase		168.316	51.7299	-1.7021	8.55289	0	0
VBICloDif38397_1865	CD1777	2058291	2058653	363	+	19441957	126699386	COG1393P	core	Arsenate reductase (EC 1.20.4.1)	arsenate reductase		29.1483	100.798	1.78998	-4.51441	6.34941e-06	2.07142e-05
VBICloDif38397_1873	CD1785	2067107	2068306	1200	+	19441973	126699394	COG0137E	core	Argininosuccinate synthase (EC 6.3.4.5)	argininosuccinate synthase	argG	103.166	34.3025	-1.58858	6.8225	8.94707e-12	5.14818e-11
VBICloDif38397_1882	CD1793	2075085	2075453	369	+	19441991	126699402	-	core	FIG00514315: hypothetical protein	hypothetical protein		45.3552	205.786	2.1818	-6.79025	1.11937e-11	6.33835e-11
VBICloDif38397_1885	CD1796	2076761	2077708	948	-	19441997	126699405	COG2221C	core	Dissimilatory sulfite reductase (desulfoviridin), alpha and beta subunits	nitrite and sulfite reductase subunit		29.8558	157.703	2.40113	-9.29555	0	0
VBICloDif38397_1886	CD1797	2077711	2079342	1632	-	19441999	126699406	COG0446R	core	NADH dehydrogenase (EC 1.6.99.3)	coenzyme A disulfide reductase (CoA-disulfide reductase) (CoADR)		35.6964	160.113	2.16524	-9.4846	0	0
VBICloDif38397_1890	CD1801	2082069	2082923	855	-	19442007	126699410	COG1284S	core	FIG00531189: hypothetical protein	membrane protein		17.7484	50.5331	1.50954	-5.0217	5.12151e-07	1.89219e-06
VBICloDif38397_1891	CD1802	2083078	2083968	891	+	19442009	126699411	COG0491R	core	putative hydrolase	metallo-beta-lactamase superfamily hydrolase		6.17958	19.6076	1.66584	-4.56466	5.00296e-06	1.65186e-05
VBICloDif38397_1896	CD1807	2090366	2090968	603	-	19442019	126699416	COG0655R	core	Iron-sulfur flavoprotein	NADPH-dependent FMN reductase		51.1318	222.729	2.123	-8.06858	6.66134e-16	5.09413e-15
VBICloDif38397_1904	CD1814	2096885	2097526	642	+	19442035	126699422	COG0406G	core	Phosphoglycerate mutase (EC 5.4.2.1)	phosphoglycerate mutase		81.0458	27.8152	-1.54287	5.53654	3.08512e-08	1.27715e-07
VBICloDif38397_1941	CD1850	2142169	2143035	867	+	19442109	126699459	COG3708S	unique	Transcriptional regulator, AraC family	AraC family transcriptional regulator		28.6554	82.3113	1.52228	-5.59569	2.19744e-08	9.3136e-08
VBICloDif38397_1958	CD1865	2166079	2167701	1623	+	19442143	126699476	COG3593L	shared	FIG131328: Predicted ATP-dependent endonuclease of the OLD family	"DNA recombination protein Tn1549-like,CTn5-Orf24"		49.4615	141.495	1.51637	-6.79538	1.08025e-11	6.13636e-11
VBICloDif38397_1961	CD1868	2169244	2170050	807	+	19442149	126699479	-	shared	FIG00519912: hypothetical protein	conjugative transposon protein		81.3719	249.585	1.61693	-7.03229	2.03171e-12	1.23712e-11
VBICloDif38397_1969	CD1876	2177747	2178400	654	+	19442165	126699488	COG0745TK	shared	Two-component response regulator VncR	"two-component response regulator; Tn1549-like,CTn5-Orf36"	vncR	30.9373	97.9178	1.66222	-5.56786	2.57885e-08	1.08014e-07
VBICloDif38397_1980	CD1885	2190819	2191631	813	+	19442187	126699496	-	unique	Acetylxylan esterase related enzyme	acetylesterase		35.4433	5.2407	-2.75768	7.42588	1.12133e-13	7.48111e-13
VBICloDif38397_1988	CD1893	2198071	2198562	492	-	19442203	126699503	COG3760S	core	FIG042921: similarity to aminoacyl-tRNA editing enzymes YbaK, ProX	oligonucleotide binding regulator		22.8983	560.134	4.61246	-14.763	0	0
VBICloDif38397_1989	CD1894	2198911	2199294	384	+	19442205	126699504	-	core	putative plasmid-related protein	hypothetical protein		9.41458	35.834	1.92836	-4.21116	2.54065e-05	7.70866e-05
VBICloDif38397_1992	CD1897	2200638	2201096	459	-	19442211	126699507	-	core	FIG00513989: hypothetical protein	hypothetical protein		27.5845	218.526	2.98587	-9.30022	0	0
VBICloDif38397_1993	CD1898	2201141	2201929	789	-	19442213	126699508	COG0860M	core	N-acetylmuramoyl-L-alanine amidase	cell wall hydrolase (endolysin)		141.873	571.234	2.00949	-9.15924	0	0
VBICloDif38397_2003	CD1907	2208482	2209612	1131	+	19442233	126699517	COG1454C	core	Alcohol dehydrogenase (EC 1.1.1.1)	ethanolamine iron-dependent Alcohol dehydrogenase	pduQ	28.6217	3.01822	-3.24534	8.44274	0	0
VBICloDif38397_2009	CD1913	2214366	2215730	1365	+	19442245	126699523	COG4303E	core	Ethanolamine ammonia-lyase heavy chain (EC 4.3.1.7)	ethanolamine ammonia lyase large subunit	eutB	10.5333	1.38368	-2.92837	5.7809	7.43006e-09	3.32343e-08
VBICloDif38397_2010	CD1914	2215743	2216624	882	+	19442247	126699524	COG4302E	core	Ethanolamine ammonia-lyase light chain (EC 4.3.1.7)	ethanolamine ammonia-lyase small subunit	eutC	5.54541	0.888897	-2.6412	3.08933	0.00200605	0.00447068
VBICloDif38397_2011	CD1915	2216644	2217297	654	+	19442249	126699525	COG4816E	core	Ethanolamine utilization polyhedral-body-like protein EutL	ethanolamine utilization protein EutL	eutL	13.2094	2.21425	-2.57668	4.15845	3.20414e-05	9.53466e-05
VBICloDif38397_2013	CD1917	2218012	2219481	1470	+	19442253	126699527	COG1012C	core	Acetaldehyde dehydrogenase, ethanolamine utilization cluster	ethanolamine acetaldehyde oxidoreductase		11.9374	1.30327	-3.19529	6.49418	8.34852e-11	4.45756e-10
VBICloDif38397_2014	CD1918	2219567	2219854	288	+	19442255	126699528	COG4577QC	core	Ethanolamine utilization protein similar to PduA/PduJ	ethanolamine carboxysome strutural protein	eutM	199.1	5.19414	-5.26047	5.9392	2.86415e-09	1.3331e-08
VBICloDif38397_2016	CD1920	2220755	2221384	630	+	19442259	126699530	COG4869Q	core	Ethanolamine utilization protein similar to PduL	propanediol utilization phosphotransacylase		15.2774	1.57425	-3.27866	4.32368	1.5345e-05	4.80764e-05
VBICloDif38397_2017	CD1921	2221426	2222151	726	+	19442261	126699531	-	core	Protein clustered with ethanolamine utilization	ethanolamine utilization protein		5.15779	0.697746	-2.88598	2.91122	0.00360024	0.00767533
VBICloDif38397_2020	CD1924	2222992	2224083	1092	+	19442267	126699534	COG3192E	core	Ethanolamine permease	ethanolamine utilization protein EutH	eutH	8.06517	1.36059	-2.56747	4.4021	1.0721e-05	3.41307e-05
VBICloDif38397_2032	CD1936	2233648	2234592	945	-	19442291	126699545	COG0825I	core	Acetyl-coenzyme A carboxyl transferase alpha chain (EC 6.4.1.2)	acetyl-coenzyme A carboxylase carboxyl transferase subunit alpha	accA	1013.57	205.37	-2.30315	11.5546	0	0
VBICloDif38397_2033	CD1937	2234613	2235467	855	-	19442293	126699546	COG0777I	core	Acetyl-coenzyme A carboxyl transferase beta chain (EC 6.4.1.2)	acetyl-CoA carboxylase subunit beta	accD	712.968	150.728	-2.24189	10.9216	0	0
VBICloDif38397_2034	CD1938	2235482	2236843	1362	-	19442295	126699547	COG4770I	core	Biotin carboxylase of acetyl-CoA carboxylase (EC 6.3.4.14)	acetyl-CoA carboxylase subunit	accC	451.626	122.192	-1.88598	9.32619	0	0
VBICloDif38397_2035	CD1939	2236859	2237311	453	-	19442297	126699548	COG0511I	core	Biotin carboxyl carrier protein of acetyl-CoA carboxylase	acetyl-CoA carboxylase subunit	accB	899.743	161.746	-2.47579	11.2514	0	0
VBICloDif38397_2041	CD1945	2241418	2241879	462	-	19442309	126699554	-	core	Lactoylglutation lyase	hypothetical protein		4.57407	17.2319	1.91353	-3.34878	0.000811668	0.00192419
VBICloDif38397_2044	CD1948	2243725	2246133	2409	-	19442315	126699557	COG4591M	core	FIG00514021: hypothetical protein	ABC transporter permease		1.2233	3.74076	1.61255	-3.93786	8.22098e-05	0.000228389
VBICloDif38397_2046	CD1950	2248318	2249178	861	+	19442319	126699559	COG1284S	core	hypothetical protein BH3604	membrane protein		152.052	49.3791	-1.6226	6.94176	3.87224e-12	2.30648e-11
VBICloDif38397_2050	CD1954	2252563	2255118	2556	-	19442327	126699563	COG4591M	core	FIG00512932: hypothetical protein	ABC transporter permease		3.93496	17.2932	2.13578	-6.89089	5.54423e-12	3.24799e-11
VBICloDif38397_2051	CD1955	2255115	2255801	687	-	19442329	126699564	COG1136V	core	ABC transporter ATP-binding protein YvcR	ABC transporter ATP-binding protein		14.6583	43.8403	1.58055	-4.7808	1.74595e-06	6.14712e-06
VBICloDif38397_2052	CD1956	2255878	2256786	909	-	19442331	126699565	COG0642T	core	two-component sensor histidine kinase	two-component sensor histidine kinase		11.8175	41.2347	1.80293	-5.62839	1.81903e-08	7.76529e-08
VBICloDif38397_2053	CD1957	2256788	2257459	672	-	19442333	126699566	COG0745TK	core	hypothetical protein	two-component response regulator		8.4649	26.2292	1.63161	-4.27367	1.92278e-05	5.91983e-05
VBICloDif38397_2055	CD1959	2258943	2259629	687	+	19442337	126699568	COG0745TK	core	two-component system response regulator	two-component response regulator		1.29569	8.83427	2.76939	-3.51497	0.000439807	0.00108457
VBICloDif38397_2056	CD1960	2259619	2260650	1032	+	19442339	126699569	COG0642T	core	Sensor protein resE (EC 2.7.3.-)	two-component sensor histidine kinase		1.95921	8.50507	2.11805	-4.23672	2.26807e-05	6.92296e-05
VBICloDif38397_2058	CD1962	2261410	2263827	2418	+	19442343	126699571	COG4591M	core	FIG00515036: hypothetical protein	ABC transporter permease		1.01159	3.14496	1.63641	-3.81027	0.000138817	0.000368933
VBICloDif38397_2063	CD1967	2268834	2269709	876	-	19442353	126699576	-	core	FIG00517937: hypothetical protein	hypothetical protein		5.28041	38.1648	2.85352	-7.7512	9.10383e-15	6.54004e-14
VBICloDif38397_2066	CD1970	2271214	2271846	633	-	19442359	126699579	COG1878R	core	Metal-dependent hydrolase	hypothetical protein		65.997	228.503	1.79174	-7.16527	7.76268e-13	4.89434e-12
VBICloDif38397_2083	CD1986	2289764	2291200	1437	-	19442393	126699594	COG0621J	core	tRNA-i(6)A37 methylthiotransferase	(Dimethylallyl)adenosine tRNA methylthiotransferase miaB (tRNA-i(6)A37 methylthiotransferase)		314.408	49.3593	-2.67124	12.5371	0	0
VBICloDif38397_2127	CD2022	2334650	2335054	405	-	19442481	126699639	-	core	FIG00516672: hypothetical protein	hypothetical protein		2.81664	21.0808	2.90388	-3.79817	0.000145769	0.000386255
VBICloDif38397_2132	CD2027	2338389	2339606	1218	+	19442491	126699644	COG0624E	core	N-carbamoyl-L-amino acid hydrolase (EC 3.5.1.87)	N-carbamoyl-L-amino acid hydrolase		30.637	125.702	2.03666	-8.22009	2.22045e-16	1.72777e-15
VBICloDif38397_2134	CD2029	2340686	2341303	618	-	19442495	126699646	-	core	FIG00516793: hypothetical protein	hypothetical protein		2370.04	789.933	-1.58511	7.87651	3.33067e-15	2.45214e-14
VBICloDif38397_2148	CD2043	2355598	2356296	699	+	19442523	126699660	-	core	putative hydrolase	hydrolase		33.1215	9.92274	-1.73896	5.06948	3.98896e-07	1.49628e-06
VBICloDif38397_2152	CD2046	2358783	2359067	285	-	19442531	126699663	-	core	FIG00518018: hypothetical protein	hypothetical protein		59.7394	191.029	1.67704	-4.69508	2.66506e-06	9.15649e-06
VBICloDif38397_2154	CD2048	2361465	2362337	873	-	19442535	126699665	COG1737K	core	Transcriptional regulator	RpiR family transcriptional regulator		643.688	174.448	-1.88356	9.26092	0	0
VBICloDif38397_2155	CD2049	2362731	2363309	579	-	19442537	126699666	COG0275M	core	SAM-dependent methyltransferase, MraW methylase family (EC 2.1.1.-)	rRNA methylase		299.902	54.8916	-2.44983	10.214	0	0
VBICloDif38397_2156	CD2050	2363367	2364083	717	-	19442539	126699667	COG1187J	core	Ribosomal large subunit pseudouridine synthase B (EC 4.2.1.70)	ribosomal large subunit pseudouridine synthase B	rluB	82.3273	19.4804	-2.07935	7.43052	1.08136e-13	7.24163e-13
VBICloDif38397_2161	CD2054	2367700	2368893	1194	-	19442549	126699671	COG0527E	core	Aspartokinase (EC 2.7.2.4)	Aspartokinase	lysC	98.8364	28.4366	-1.79729	7.61648	2.59792e-14	1.79732e-13
VBICloDif38397_2172	CD2065	2380224	2380601	378	-	19442571	126699682	COG3682K	core	Transcriptional regulator, MecI family	beta-lactams repressor		32.2793	223.89	2.79411	-8.09516	6.66134e-16	5.09413e-15
VBICloDif38397_2175	CD2068	2382937	2384562	1626	-	19442577	126699685	COG0488R	core	ABC transporter ATP-binding protein uup	ABC transporter ATP-binding protein		1147.72	321.615	-1.83536	8.78652	0	0
VBICloDif38397_2178	CD2071	2386592	2387314	723	-	19442583	126699688	-	core	Molybdopterin-guanine dinucleotide biosynthesis protein MobA	hypothetical protein		13.6132	4.66234	-1.54588	3.43956	0.000582653	0.00142009
VBICloDif38397_2197	CD2090	2412995	2414356	1362	-	19442621	126699707	COG2233F	core	Xanthine permease	xanthine/uracile permease		0.932839	4.58862	2.29836	-3.87706	0.000105728	0.00028854
VBICloDif38397_2205	CD2098	2423523	2423834	312	-	19442637	126699715	-	core	FIG00516908: hypothetical protein	hypothetical protein		8.11741	31.4091	1.95209	-3.03618	0.00239595	0.00526251
VBICloDif38397_2206	CD2099	2423974	2426238	2265	-	19442639	126699716	COG1529C	core	Xanthine dehydrogenase, molybdenum binding subunit (EC 1.17.1.4)	"xanthine dehydrogenase subunit XdhD,molybdopterin-binding"		279.321	80.975	-1.78637	8.98948	0	0
VBICloDif38397_2207	CD2100	2426242	2426691	450	-	19442641	126699717	COG2080C	core	Carbon monoxide dehydrogenase small chain (EC 1.2.99.2)	xanthine dehydrogenase iron-sulfur binding subunit XdhC3		151.486	39.6643	-1.93328	6.79955	1.04947e-11	5.99024e-11
VBICloDif38397_2208	CD2101	2426691	2427479	789	-	19442643	126699718	COG1319C	core	Xanthine dehydrogenase, FAD binding subunit (EC 1.17.1.4)	"xanthine dehydrogenase subunit XdhB,FAD-binding"		100.512	28.8579	-1.80033	6.9581	3.44902e-12	2.0613e-11
VBICloDif38397_2209	CD2102	2427674	2428942	1269	-	19442645	400927396	-	core	FIG00515794: hypothetical protein	Na(+)/H(+) antiporter		137.956	40.3927	-1.77204	7.92567	2.22045e-15	1.64841e-14
VBICloDif38397_2226	CD2116	2447691	2449514	1824	+	19442679	126699733	COG1217T	core	GTP-binding protein TypA/BipA	GTP-binding protein BipA	bipA	441.15	97.0543	-2.18441	10.9928	0	0
VBICloDif38397_2231	CD2120	2454224	2455222	999	+	19442689	126699737	COG2070R	core	Enoyl-[acyl-carrier-protein] reductase [FMN] (EC 1.3.1.9)	2-nitropropane dioxygenase		681.922	88.9483	-2.93857	14.096	0	0
VBICloDif38397_2237	CD2125	2460813	2461337	525	-	19442701	400927402	-	core	acetyltransferase (GNAT) family protein	acetyltransferase		283.06	64.0686	-2.14342	8.82194	0	0
VBICloDif38397_2247	CD2135	2471997	2472776	780	-	19442721	126699751	COG4589R	core	Phosphatidate cytidylyltransferase (EC 2.7.7.41)	phosphatidate cytidylyltransferase	cdsA	372.981	92.1438	-2.01714	9.31741	0	0
VBICloDif38397_2251	CD2138	2474341	2475045	705	-	19442729	126699755	COG0528F	core	Uridylate kinase (EC 2.7.4.-)	Uridylate kinase (UK) (Uridine monophosphate kinase) (UMP kinase) (UMPK)	pyrH	1439.34	191.527	-2.90979	14.2373	0	0
VBICloDif38397_2252	CD2139	2475130	2476041	912	-	19442731	126699756	COG0264J	core	Translation elongation factor Ts	elongation factor Ts	tsf	2826.05	366.799	-2.94573	14.7259	0	0
VBICloDif38397_2253	CD2140	2476120	2476833	714	-	19442733	126699757	COG0052J	core	SSU ribosomal protein S2p (SAe)	30S ribosomal protein S2	rpsB	7078.84	1012.64	-2.8054	13.1502	0	0
VBICloDif38397_2258	CD2145	2481118	2483028	1911	-	19442743	126699762	COG1193L	core	Clostridial MutS2-related protein	DNA mismatch repair protein		176.525	49.8135	-1.82526	8.69158	0	0
VBICloDif38397_2261	CD2149	2486128	2487387	1260	-	19442749	126699765	COG2720V	core	Vancomycin B-type resistance protein VanW	"vancomycin resistance protein, vanW family"		609.092	105.967	-2.52304	12.4158	0	0
VBICloDif38397_2264	CD2151	2488952	2490049	1098	-	19442755	400927411	-	core	FIG00513802: hypothetical protein	hypothetical protein		641.597	47.7872	-3.74697	17.4305	0	0
VBICloDif38397_2265	CD2152	2490554	2491594	1041	+	19442757	126699768	COG1363G	core	Deblocking aminopeptidase (EC 3.4.11.-)	"glutamyl-aminopeptidase, M42 family"		457.247	71.6572	-2.67379	12.5863	0	0
VBICloDif38397_2266	CD2153	2491975	2492226	252	+	19442759	126699769	-	core	FIG00516306: hypothetical protein	hypothetical protein		1661.45	568.444	-1.54735	6.67721	2.43527e-11	1.34679e-10
VBICloDif38397_2271	CD2158	2496541	2497866	1326	-	19442769	126699774	COG0160E	core	Siderophore biosynthesis diaminobutyrate--2-oxoglutarate aminotransferase (EC 2.6.1.76)	4-aminobutyrate aminotransferase	gabT	73.4936	1043.16	3.8272	-15.5114	0	0
VBICloDif38397_2286	CD2171	2511471	2512532	1062	-	19442799			core	Proton/sodium-glutamate symport protein			1681.59	146.345	-3.52239	17.5561	0	0
VBICloDif38397_2289	CD2174	2515289	2516086	798	-	19442805	126699790	COG0834ET	core	FIG00519044: hypothetical protein	ABC transporter cystine/aminoacid-family extracellular solute-binding protein		1655.26	414.318	-1.99825	10.0399	0	0
VBICloDif38397_2290	CD2175	2516146	2516808	663	-	19442807	126699791	COG0765E	core	probable amino-acid ABC transporter, permease protein	ABC transporter cystine/aminoacid-family permease		1078.11	363.179	-1.56975	7.86564	3.77476e-15	2.76764e-14
VBICloDif38397_2292	CD2177	2517705	2518508	804	-	19442811	126699793	COG0834ET	core	Cystine ABC transporter, periplasmic cystine-binding protein FliY	ABC transporter cystine/aminoacid-family extracellular solute-binding protein		1692	573.025	-1.56206	7.65113	1.9984e-14	1.39613e-13
VBICloDif38397_2293	CD2178	2518916	2519338	423	-	19442813	126699794	COG0437C	core	Anaerobic dimethyl sulfoxide reductase chain B (EC 1.8.99.-)	"oxidoreductase, Fe-S subunit"		414.614	127.662	-1.69944	7.22208	5.12035e-13	3.26308e-12
VBICloDif38397_2294	CD2179	2519352	2521475	2124	-	19442815	126699795	COG0243C	core	Anaerobic dimethyl sulfoxide reductase chain A (EC 1.8.99.-)	anaerobic dehydrogenase		299.942	103.981	-1.52836	7.68731	1.5099e-14	1.06956e-13
VBICloDif38397_2298	CD2183	2526501	2527994	1494	-	19442823	126699799	COG0513LKJ	core	ATP-dependent RNA helicase YxiN	ATP-dependent RNA helicase	csdA	22.9675	7.62291	-1.59118	5.44682	5.12779e-08	2.07209e-07
VBICloDif38397_2315	CD2200	2547943	2549046	1104	-	19442857	126699817	COG0079E	core	Biosynthetic Aromatic amino acid aminotransferase beta (EC 2.6.1.57)	histidinol-phosphate aminotransferase		0.951609	2.84187	1.5784	-2.1974	0.0279916	0.0491771
VBICloDif38397_2316	CD2201	2549149	2550579	1431	-	19442859	126699818	COG2211G	core	Lactose permease	"transporter, Major Facilitator Superfamily (MFS)"		0.553164	2.87772	2.37915	-3.13632	0.00171081	0.00384311
VBICloDif38397_2332	CD2216	2567562	2568239	678	+	19442891	126699833	-	core	FIG00514295: hypothetical protein	hypothetical protein		20.1763	58.1279	1.52657	-4.71224	2.45006e-06	8.4751e-06
VBICloDif38397_2336	CD2220	2571708	2572328	621	+	19442899	126699837	COG0664T	unique	Predicted N-ribosylNicotinamide CRP-like regulator	cyclic nucleotides-binding protein		293.083	924.47	1.65732	-7.66052	1.84297e-14	1.29262e-13
VBICloDif38397_2353	CD2238	2589317	2589769	453	-	19442933	126699855	COG2731G	core	probable beta-D-galactosidase	hypothetical protein		6.36286	52.9979	3.05819	-6.46147	1.03693e-10	5.48707e-10
VBICloDif38397_2354	CD2239	2589899	2591401	1503	-	19442935	126699856	COG0591ER	core	Predicted sialic acid transporter	"Na+/solute symporter, SSS family"		11.74	82.1171	2.80624	-10.1806	0	0
VBICloDif38397_2355	CD2240	2591434	2592315	882	-	19442937	126699857	COG0329EM	core	N-acetylneuraminate lyase (EC 4.1.3.3)	N-acetylneuraminate lyase	nanA	4.61389	27.3106	2.5654	-6.81817	9.22107e-12	5.29727e-11
VBICloDif38397_2356	CD2241	2592385	2593056	672	-	19442939	126699858	COG3010G	core	N-acetylmannosamine-6-phosphate 2-epimerase (EC 5.1.3.9)	N-acetylmannosamine-6-phosphate 2-epimerase	nanE	10.1031	55.4852	2.4573	-7.12861	1.01386e-12	6.32504e-12
VBICloDif38397_2364	CD2248	2604565	2605761	1197	-	19442955	126699866	COG3825S	core	FIG00514672: hypothetical protein	hypothetical protein		60.7786	291.856	2.26362	-9.94735	0	0
VBICloDif38397_2365	CD2249	2605782	2606603	822	-	19442957	126699867	COG0714R	core	ATPase associated with various cellular activities, AAA_5	ATPase		60.3652	319.426	2.40369	-10.1083	0	0
VBICloDif38397_2367	CD2251	2608312	2608668	357	+	19442961	126699869	-	core	FIG00513650: hypothetical protein	hypothetical protein		119.89	2130.44	4.15137	-13.7936	0	0
VBICloDif38397_2372	CD2256	2614623	2615672	1050	+	19442971	126699874	COG3641R	core	Predicted nicotinate-regulated transporter BH3254	PTS system transporter subunit IIC		8.2764	27.3883	1.72648	-5.26433	1.40704e-07	5.48022e-07
VBICloDif38397_2377	CD2262	2620887	2622278	1392	-	19442981	126699879	COG3104E	core	Di/tripeptide permease YjdL	"transporter, Major Facilitator Superfamily (MFS)"		55.6748	230.389	2.04897	-9.20496	0	0
VBICloDif38397_2381	CD2266	2626135	2627661	1527	-	19442989	126699883	COG0665E	core	putative oxidoreductase	"oxidoreductase, FAD dependent"		89.8662	18.7178	-2.26337	9.5504	0	0
VBICloDif38397_2383	CD2269	2629541	2631460	1920	-	19442993	126699884	COG1299G	core	PTS system, fructose-specific IIA component (EC 2.7.1.69) / PTS system, fructose-specific IIB component (EC 2.7.1.69) / PTS system, fructose-specific IIC component (EC 2.7.1.69)	PTS system fructose-specific transporter subunit IIABC		1933.68	13.9601	-7.11389	31.304	0	0
VBICloDif38397_2384	CD2270	2631497	2632414	918	-	19442995	126699885	COG1105G	core	1-phosphofructokinase (EC 2.7.1.56)	fructose 1-phosphate kinase	fruK	882.272	6.8003	-7.01948	23.4725	0	0
VBICloDif38397_2388	CD2274	2636600	2637853	1254	-	19443003	126699889	-	core	FIG00514563: hypothetical protein	hypothetical protein		99.8872	28.1703	-1.82613	7.73183	1.06581e-14	7.62582e-14
VBICloDif38397_2389	CD2275	2637957	2640077	2121	-	19443005	126699890	COG0550L	core	DNA topoisomerase III (EC 5.99.1.2)	DNA topoisomerase III		109.068	30.36	-1.84498	8.4932	0	0
VBICloDif38397_2394	CD2280	2645175	2646581	1407	-	19443015	126699895	COG3775G	core	PTS system, galactitol-specific IIC component (EC 2.7.1.69)	PTS system fructose/mannitol family transporter subunit IIC		1.39677	5.58255	1.99883	-4.20522	2.60832e-05	7.87368e-05
VBICloDif38397_2405	CD2290	2658361	2658735	375	-	19443037	126699905	COG3682K	unique	Transcriptional regulator, MecI family	beta-lactams repressor		15.9769	4.78704	-1.73878	2.54773	0.0108426	0.0211267
VBICloDif38397_2409	CD2295	2660635	2661099	465	+	19443045	126699910	-	unique	FIG00526016: hypothetical protein	membrane protein		2.7769	8.3459	1.58759	-2.20003	0.0278048	0.0489233
VBICloDif38397_2416	CD2301	2666036	2666290	255	-	19443059	400927430	-	core	FIG00513083: hypothetical protein	hypothetical protein		11.0372	71.2791	2.6911	-3.92896	8.5313e-05	0.000235904
VBICloDif38397_2428	CD2311	2673187	2673999	813	+	19443083	126699929	COG0725P	core	Molybdenum ABC transporter, periplasmic molybdenum-binding protein ModA (TC 3.A.1.8.1)	ABC transporter molybdenum-like extracellular solute-binding protein		11.5428	42.4701	1.87945	-5.76104	8.35986e-09	3.71596e-08
VBICloDif38397_2429	CD2312	2674009	2674800	792	+	19443085	126699930	COG0555O	core	Sulfate transport system permease protein CysT	ABC transporter molybdenum-like permease	modB	1.49288	15.3491	3.36198	-5.43144	5.59025e-08	2.25385e-07
VBICloDif38397_2430	CD2313	2674802	2675497	696	+	19443087	126699931	COG3839G	core	ABC transporter ATP-binding protein	ABC transporter molybdenum-like ATP-binding protein		6.56694	19.1758	1.54599	-3.97491	7.04063e-05	0.000198387
VBICloDif38397_2431	CD2314	2675484	2676215	732	+	19443089	126699932	COG2014S	core	FIG00513814: hypothetical protein	hypothetical protein		7.27272	22.4583	1.62668	-4.34409	1.39855e-05	4.39331e-05
VBICloDif38397_2435	CD2318	2680455	2681957	1503	-	19443097	126699936	COG1109G	core	Phosphomannomutase (EC 5.4.2.8)	phosphohexomutase		879.773	85.9701	-3.35522	16.6262	0	0
VBICloDif38397_2436	CD2319	2682067	2682732	666	-	19443099	126699937	COG0036G	core	Ribulose-phosphate 3-epimerase (EC 5.1.3.1)	ribulose-phosphate 3-epimerase	rpe	237.051	53.9699	-2.13497	8.95078	0	0
VBICloDif38397_2437	CD2320	2682762	2683208	447	-	19443101	126699938	COG0698G	core	Ribose 5-phosphate isomerase B (EC 5.3.1.6)	ribose-5-phosphate isomerase B1 (Phosphoriboisomerase B)	rpiB1	403.089	46.5994	-3.11271	12.0256	0	0
VBICloDif38397_2438	CD2321	2683383	2684303	921	-	19443103	126699939	COG3958G	core	Transketolase, C-terminal section (EC 2.2.1.1)	"transketolase, central and C-terminal (Sedoheptulose-7-phosphate:D-glyceraldehyde-3-phosphate glycolaldehydetransferase)"	tkt'	2473.54	417.632	-2.56627	12.7438	0	0
VBICloDif38397_2439	CD2322	2684306	2685118	813	-	19443105	126699940	COG3959G	core	Transketolase, N-terminal section (EC 2.2.1.1)	"transketolase, N-terminal (Sedoheptulose-7-phosphate:D-glyceraldehyde-3-phosphate glycolaldehydetransferase)"	tkt	3003.44	421.739	-2.83219	14.1701	0	0
VBICloDif38397_2440	CD2323	2685210	2686241	1032	-	19443107	126699941	COG1063ER	core	Galactitol-1-phosphate 5-dehydrogenase (EC 1.1.1.251)	sugar-phosphate dehydrogenase		5.45907	24.7403	2.18014	-6.1269	8.96093e-10	4.35911e-09
VBICloDif38397_2441	CD2324	2686241	2687293	1053	-	19443109	126699942	COG1063ER	core	Galactitol-1-phosphate 5-dehydrogenase (EC 1.1.1.251)	sugar-phosphate dehydrogenase	gatD	2.46851	19.152	2.95578	-7.16018	8.058e-13	5.07155e-12
VBICloDif38397_2442	CD2325	2687423	2688697	1275	-	19443111	126699943	COG3775G	core	PTS system, galactitol-specific IIC component (EC 2.7.1.69)	PTS system fructose/mannitol family transporter subunit IIC	gatC	3.85316	162.743	5.40041	-15.7014	0	0
VBICloDif38397_2443	CD2326	2688756	2689031	276	-	19443113	126699944	COG3414G	core	PTS system, galactitol-specific IIB component (EC 2.7.1.69)	PTS system fructose/mannitol family transporter subunit IIB	gatB	4.71289	271.861	5.85011	-6.2124	5.21824e-10	2.60985e-09
VBICloDif38397_2444	CD2327	2689092	2689550	459	-	19443115	126699945	COG1762GT	core	PTS system, galactitol-specific IIA component (EC 2.7.1.69)	PTS system fructose/mannitol family transporter subunit IIA	gatA	1.05127	51.3929	5.61136	-4.60868	4.0524e-06	1.35563e-05
VBICloDif38397_2447	CD2330	2693929	2694501	573	-	19443121	126699948	COG0503F	core	Xanthine phosphoribosyltransferase (EC 2.4.2.22)	xanthine phosphoribosyltransferase	xpt	408.98	131.107	-1.64128	7.42722	1.108e-13	7.40612e-13
VBICloDif38397_2455	CD2338	2704760	2705878	1119	-	19443137	126699956	COG1454C	core	NAD-dependent 4-hydroxybutyrate dehydrogenase (EC 1.1.1.61)	4-hydroxybutyrate dehydrogenase (4-hydroxybutanoate:NAD+ oxidoreductase)	abfH	814.385	153.014	-2.41204	12.1011	0	0
VBICloDif38397_2456	CD2339	2705898	2707205	1308	-	19443139	126699957	COG0427C	core	4-hydroxybutyrate:acetyl-CoA CoA transferase (EC 2.3.1.-)	4-hydroxybutyrate CoA-transferase	abfT	618.635	129.051	-2.26115	11.2804	0	0
VBICloDif38397_2457	CD2340	2707229	2707504	276	-	19443141	126699958	-	core	FIG00514896: hypothetical protein	hypothetical protein		78.4372	18.8564	-2.05648	3.96196	7.43357e-05	0.000207866
VBICloDif38397_2458	CD2341	2707639	2709135	1497	-	19443143	126699959	COG2368Q	core	4-hydroxybutanoyl-CoA dehydratase (EC 4.2.1.-) / Vinylacetyl-CoA Delta-isomerase (EC 5.3.3.3)	gamma-aminobutyrate metabolism dehydratase/isomerase	abfD	719.998	149.25	-2.27027	11.4385	0	0
VBICloDif38397_2459	CD2342	2709328	2710719	1392	-	19443145	126699960	COG1012C	core	Succinate-semialdehyde dehydrogenase, CoA-dependent	succinate-semialdehyde dehydrogenase (NAD(P)+)	sucD	917.279	57.3455	-3.99961	19.2196	0	0
VBICloDif38397_2460	CD2343	2710750	2712294	1545	-	19443147	126699961	COG0427C	core	Succinyl-CoA:coenzyme A transferase (EC 2.8.3.-)	succinyl-CoA:coenzyme A transferase	cat1	626.809	39.4352	-3.99047	18.8518	0	0
VBICloDif38397_2461	CD2344	2712321	2713706	1386	-	19443149	126699962	COG2985R	core	FIG00516592: hypothetical protein	membrane protein		357.081	38.1418	-3.22681	14.9621	0	0
VBICloDif38397_2464	CD2347	2715912	2716991	1080	-	19443155	126699965	COG0006E	core	Aminopeptidase YpdF (MP-, MA-, MS-, AP-, NP- specific)	Xaa-Pro dipeptidase		94.2713	280.697	1.57412	-7.25647	3.97238e-13	2.54978e-12
VBICloDif38397_2465	CD2348	2717305	2718450	1146	-	19443157	126699966	COG0416I	core	Glycine/sarcosine/betaine reductase component C chain 2	glycine reductase complex component C subunit alpha (Protein PC alpha)	grdD	10.2344	42.379	2.04992	-6.69625	2.13831e-11	1.1881e-10
VBICloDif38397_2466	CD2349	2718461	2719993	1533	-	19443159	126699967	COG3425I	core	Glycine/sarcosine/betaine reductase component C chain 1	glycine reductase complex component C subunit beta (Protein PC beta)	grdC	4.07316	63.201	3.95573	-11.781	0	0
VBICloDif38397_2468	CD2352	2721591	2722064	474	-	19443163	400927435	-	core	Glycine/sarcosine/betaine reductase protein A @ selenocysteine-containing	glycine/sarcosine/betaine reductase complex protein A	grdA	4.88252	45.2918	3.21355	-6.3392	2.30958e-10	1.18341e-09
VBICloDif38397_2469	CD2354	2722176	2723462	1287	-	19443165	126699970	-	core	Glycine reductase component B beta subunit (EC 1.21.4.2) / Glycine reductase component B alpha subunit (EC 1.21.4.2)	glycine reductase complex component B subunits alpha and beta	grdE	2.77883	51.8153	4.22083	-11.0911	0	0
VBICloDif38397_2470	CD2355	2723731	2724048	318	-	19443167	126699971	COG3118O	core	Thioredoxin	thioredoxin 2 (Trx2)	trxA2	3.23594	42.0155	3.69867	-3.86202	0.000112455	0.000304561
VBICloDif38397_2471	CD2356	2724146	2725093	948	-	19443169	126699972	COG0492O	core	Thioredoxin reductase (EC 1.8.1.9)	thioredoxin reductase 3	trxB3	6.27362	83.9534	3.74222	-10.8673	0	0
VBICloDif38397_2472	CD2357	2725189	2725560	372	-	19443171	126699973	-	core	GrdX protein	glycine reductase complex component	grdX	2.2706	21.0399	3.21198	-3.28968	0.00100301	0.00234558
VBICloDif38397_2487	CD2370	2735850	2736686	837	-	19443201	126699985	COG0157H	core	Quinolinate phosphoribosyltransferase [decarboxylating] (EC 2.4.2.19)	Nicotinate-nucleotide pyrophosphorylase	nadC	13.7391	133.044	3.27554	-10.7979	0	0
VBICloDif38397_2488	CD2371	2736667	2737968	1302	-	19443203	126699986	COG0029H	core	L-aspartate oxidase (EC 1.4.3.16)	L-aspartate oxidase	nadB	27.6365	212.638	2.94375	-12.0418	0	0
VBICloDif38397_2489	CD2372	2737981	2738895	915	-	19443205	126699987	COG0379H	core	Quinolinate synthetase (EC 2.5.1.72)	quinolinate synthetase	nadA	12.7862	179.538	3.81163	-12.6851	0	0
VBICloDif38397_2493	CD2376	2741936	2742958	1023	-	19443213	126699991	COG0628R	core	FIG00512864: hypothetical protein	membrane protein		37.8845	119.595	1.65847	-6.5344	6.38649e-11	3.43057e-10
VBICloDif38397_2496	CD2379	2744618	2745688	1071	-	19443219	126699994	COG3426C	core	Butyrate kinase (EC 2.7.2.7)	butyrate kinase		240.444	4857.57	4.33646	-16.3384	0	0
VBICloDif38397_2497	CD2380	2745741	2746316	576	-	19443221	126699995	COG1014C	core	Indolepyruvate oxidoreductase subunit IorB (EC 1.2.7.8)	indolepyruvate oxidoreductase subunit beta	iorB	18.9265	2717.1	7.16551	-21.6614	0	0
VBICloDif38397_2498	CD2381	2746318	2748105	1788	-	19443223	126699996	COG4231C	core	Indolepyruvate oxidoreductase subunit IorA (EC 1.2.7.8)	indole pyruvate ferredoxin/flavodoxin oxidoreductase	iorA	13.2399	2184.37	7.36619	-24.1111	0	0
VBICloDif38397_2499	CD2382	2748166	2749425	1260	-	19443225	126699997	COG1448E	core	Biosynthetic Aromatic amino acid aminotransferase alpha (EC 2.6.1.57) @ Aspartate aminotransferase (EC 2.6.1.1)	pyridoxal phosphate-dependent transferase		15.6861	1579.8	6.65411	-22.262	0	0
VBICloDif38397_2501	CD2384	2751695	2753581	1887	-	19443229	126699999	COG2199T	core	FIG00521324: hypothetical protein	diguanylate cyclase signaling protein		48.1653	15.0515	-1.67809	6.93474	4.06986e-12	2.41609e-11
VBICloDif38397_2514	CD2396	2765435	2765941	507	-	19443255	126700011	COG1853R	core	FIG00513194: hypothetical protein	hypothetical protein		861.339	207.426	-2.05398	9.66472	0	0
VBICloDif38397_2519	CD2401	2769021	2769593	573	+	19443265	126700016	COG3546P	shared	Polypeptide composition of the spore coat protein CotJC	spore coat peptide assembly protein CotJC 2	cotJC2	1.40782	13.2896	3.23876	-3.83363	0.000126267	0.000339386
VBICloDif38397_2520	CD2402	2769828	2771018	1191	-	19443267	126700017	COG0791M	core	N-acetylmuramoyl-L-alanine amidase	cell wall hydrolase; phosphatase-associated protein		250.136	67.3295	-1.8934	8.83244	0	0
VBICloDif38397_2521	CD2403	2771278	2771709	432	-	19443269	126700018	COG0756F	core	Deoxyuridine 5'-triphosphate nucleotidohydrolase (EC 3.6.1.23)	deoxyuridine 5'-triphosphate nucleotidohydrolase	dut	534.124	123.745	-2.10981	9.06521	0	0
VBICloDif38397_2522	CD2404	2771822	2774050	2229	+	19443271	126700019	COG0550L	core	DNA topoisomerase III (EC 5.99.1.2)	DNA topoisomerase type IA		50.9842	17.0509	-1.5802	6.80737	9.93983e-12	5.68594e-11
VBICloDif38397_2524	CD2406	2774898	2776121	1224	+	19443275	126700021	COG0845M	core	Probable Co/Zn/Cd efflux system membrane fusion protein	lipoprotein		268.527	80.1545	-1.74421	8.27082	2.22045e-16	1.72777e-15
VBICloDif38397_2525	CD2407	2776170	2779259	3090	+	19443277	126700022	COG0841V	core	RND multidrug efflux transporter; Acriflavin resistance protein	multidrug efflux pump		125.069	42.2038	-1.56728	7.6571	1.90958e-14	1.33671e-13
VBICloDif38397_2526	CD2408	2779281	2780591	1311	+	19443279	400927441	-	core	FIG00521244: hypothetical protein	multidrug efflux pump		153.218	53.3454	-1.52215	6.96676	3.24318e-12	1.9514e-11
VBICloDif38397_2527	CD2409	2780880	2781125	246	-	19443281	126700024	-	core	FIG00520139: hypothetical protein	hypothetical protein		4.61284	237.303	5.68493	-4.58285	4.58679e-06	1.52293e-05
VBICloDif38397_2528	CD2410	2781339	2783966	2628	-	19443283	400927442	-	core	Pyruvate,phosphate dikinase (EC 2.7.9.1)	"pyruvate phosphate dikinase (ATP:pyruvate,phosphate phosphotransferase)"	ppdK	146.196	10804.9	6.20764	-24.3734	0	0
VBICloDif38397_2529	CD2411	2784027	2784863	837	-	19443285	126700026	COG1806S	core	ATP/GTP-binding protein, SA1392 homolog	PEP synthetase regulatory protein		413.891	4157.83	3.32851	-13.1468	0	0
VBICloDif38397_2530	CD2412	2784876	2785373	498	-	19443287	126700027	COG2905T	core	CBS domain protein, lmo1865 homolog	negative regulator of gluconeogenesis		542.162	5443.84	3.32783	-13.6079	0	0
VBICloDif38397_2531	CD2413	2785950	2787242	1293	-	19443289	126700028	COG4091E	core	Homoserine dehydrogenase (EC 1.1.1.3); Sorbitol-6-phosphate 2-dehydrogenase (EC 1.1.1.140)	NAD(P)-binding protein		2.49581	28.0932	3.49264	-9.01117	0	0
VBICloDif38397_2532	CD2414	2787279	2787635	357	-	19443291	126700029	COG3731G	core	PTS system, glucitol/sorbitol-specific IIA component (EC 2.7.1.69)	PTS system sorbitol-like transporter subunit IIA	srlB	5.01307	16.2977	1.7009	-2.45182	0.0142137	0.0269425
VBICloDif38397_2533	CD2415	2787670	2788029	360	-	19443293	126700030	-	core	FIG00516121: hypothetical protein	sorbitol-like operon activator protein (Glucitol)		1.1943	10.215	3.09644	-2.20573	0.0274031	0.0483841
VBICloDif38397_2534	CD2416	2788098	2790071	1974	-	19443295	126700031	COG3711K	core	Sorbitol operon transcription regulator	PTS operon transcription antiterminator		0.228352	4.03398	4.14288	-4.19192	2.76605e-05	8.30748e-05
VBICloDif38397_2535	CD2417	2790293	2791306	1014	-	19443297	126700032	COG3732G	core	PTS system, glucitol/sorbitol-specific IIB component and second of two IIC components (EC 2.7.1.69)	PTS system glucitol/sorbitol-specific transporter subunit IIB	srlE	0.826917	31.7537	5.26304	-7.29814	2.91767e-13	1.90022e-12
VBICloDif38397_2541	CD2423	2797912	2799171	1260	-	19443309	126700038	COG2271G	core	FIG00522863: hypothetical protein	"transporter, Major Facilitator Superfamily (MFS)"		3.69413	14.2226	1.94487	-5.28677	1.24497e-07	4.89726e-07
VBICloDif38397_2542	CD2424	2799195	2800403	1209	-	19443311	126700039	COG1167KE	core	Aspartate aminotransferase (AspB-4) (EC 2.6.1.1)	pyridoxal phosphate-dependent transferase		5.00223	15.2053	1.60393	-4.48081	7.43599e-06	2.40823e-05
VBICloDif38397_2572	CD2451	2825848	2828256	2409	-	19443371	400927445	-	core	FIG00516337: hypothetical protein	CRISPR-associated ATP-dependent helicase		31.7907	118.011	1.89224	-8.26721	2.22045e-16	1.72777e-15
VBICloDif38397_2575	CD2454	2830132	2831607	1476	-	19443377	126700071	-	core	FIG00514106: hypothetical protein	hypothetical protein		4.98341	20.6605	2.05167	-5.67033	1.42521e-08	6.16553e-08
VBICloDif38397_2577	CD2456	2833085	2834194	1110	+	19443381	126700073	COG3839G	core	Multiple sugar ABC transporter, ATP-binding protein	ABC transporter sugar-family ATP-binding protein		342.032	91.7495	-1.89836	8.98189	0	0
VBICloDif38397_2589	CD2467	2847944	2849749	1806	-	19443405	126700084	COG0481M	core	Translation elongation factor LepA	GTP-binding protein LepA	lepA	415.131	97.9567	-2.08335	10.5035	0	0
VBICloDif38397_2596	CD2474	2855029	2856072	1044	-	19443419	126700091	COG1466L	core	DNA polymerase III delta subunit (EC 2.7.7.7)	DNA polymerase III subunit delta		72.3711	22.9326	-1.65801	6.42545	1.31483e-10	6.88592e-10
VBICloDif38397_2613	CD2491	2873435	2874379	945	+	19443453	126700108	COG1482G	core	Mannose-6-phosphate isomerase (EC 5.3.1.8)	mannose-6-phosphate isomerase (Phosphomannose isomerase) (PMI) (Phosphohexomutase)	pmi	250.521	61.9126	-2.01663	9.14338	0	0
VBICloDif38397_2619	CD2498	2882690	2883979	1290	+	19443465	126700114	COG1686M	core	D-alanyl-D-alanine carboxypeptidase (EC 3.4.16.4)	D-alanyl-D-alanine carboxypeptidase (putative sporulation-specific penicillin-binding protein)		495.923	127.485	-1.95979	9.56267	0	0
VBICloDif38397_2624	CD2502	2887567	2888670	1104	+	19443475	126700118	COG0079E	core	Histidinol-phosphate aminotransferase (EC 2.6.1.9)	pyridoxal phosphate-dependent transferase		27.7512	245.438	3.14473	-12.3163	0	0
VBICloDif38397_2631	CD2509	2896691	2898043	1353	-	19443489	126700125	COG1486G	core	Maltose-6'-phosphate glucosidase (EC 3.2.1.122)	"glycoside hydrolase, family 4"		59.1776	15.2382	-1.95736	7.7294	1.08802e-14	7.76906e-14
VBICloDif38397_2632	CD2510	2898140	2899690	1551	-	19443491	126700126	COG1263G	core	PTS system, maltose and glucose-specific IIC component (EC 2.7.1.69) / PTS system, maltose and glucose-specific IIB component (EC 2.7.1.69)	PTS system glucose-like transporter subunit IIBC		89.1416	12.6216	-2.8202	11.5191	0	0
VBICloDif38397_2633	CD2511	2899741	2900556	816	-	19443493	126700127	COG3711K	core	Beta-glucoside bgl operon antiterminator, BglG family	PTS operon transcription antiterminator		42.1887	5.0059	-3.07516	8.27106	2.22045e-16	1.72777e-15
VBICloDif38397_2634	CD2512	2900577	2901059	483	-	19443495	126700128	COG2190G	core	PTS system, glucose-specific IIA component (EC 2.7.1.69)	PTS system glucose-like transporter subunit IIA		242.226	10.795	-4.48793	12.6943	0	0
VBICloDif38397_2637	CD2515	2903694	2905322	1629	+	19443501	126700131	COG0436E	core	hypothetical protein	aspartate aminotransferase	aspD	121.626	5.88778	-4.36859	16.3055	0	0
VBICloDif38397_2638	CD2516	2905443	2906438	996	+	19443503	126700132	COG0252EJ	core	L-asparaginase (EC 3.5.1.1)	L-asparaginase		285.719	36.3987	-2.97264	13.0718	0	0
VBICloDif38397_2641	CD2518	2908692	2910062	1371	-	19443509	126700135	COG2247M	unique	cell surface protein	cell surface protein		27.2568	295.382	3.43789	-13.7679	0	0
VBICloDif38397_2644	CD2521	2913233	2915653	2421	-	19443515	126700138	COG0495J	core	Leucyl-tRNA synthetase (EC 6.1.1.4)	leucyl-tRNA ligase	leuS	435.02	104.241	-2.06116	10.4079	0	0
VBICloDif38397_2652	CD2529	2922574	2922885	312	-	19443531	126700146	-	core	FIG00514737: hypothetical protein	hypothetical protein		20.8106	75.4675	1.85853	-4.43381	9.25832e-06	2.96867e-05
VBICloDif38397_2653	CD2530	2922963	2923781	819	-	19443533	126700147	COG2207K	core	FIG00520936: hypothetical protein	AraC family transcriptional regulator		2.16334	57.3472	4.72839	-9.31794	0	0
VBICloDif38397_2654	CD2531	2923881	2924405	525	-	19443535	126700148	COG4720S	core	Substrate-specific component PdxU2 of predicted pyridoxin-related ECF transporter	membrane protein		31.4949	900.975	4.8383	-16.5684	0	0
VBICloDif38397_2655	CD2532	2924424	2925566	1143	-	19443537	126700149	COG0075E	core	Serine--pyruvate aminotransferase (EC 2.6.1.51)	"aminotransferase, alanine--glyoxylate transaminase"		17.9895	440.516	4.61397	-16.8421	0	0
VBICloDif38397_2663	CD2540	2935547	2936881	1335	-	19443553	126700157	COG0446R	core	Pyridine nucleotide-disulfide oxidoreductase; NADH dehydrogenase (EC 1.6.99.3)	coenzyme A disulfide reductase	nox	155.184	32.2991	-2.26442	10.0904	0	0
VBICloDif38397_2670	CD2547	2946025	2947773	1749	-	19443567	126700164	-	core	Neuraminidase NanP	hypothetical protein		1084.35	99.7889	-3.44181	17.1751	0	0
VBICloDif38397_2671	CD2548	2947831	2948640	810	-	19443569	126700165	COG0395G	core	ABC-type sugar transport system, permease component	ABC transporter sugar-family permease		493.772	40.452	-3.60956	15.764	0	0
VBICloDif38397_2672	CD2549	2948656	2949573	918	-	19443571	126700166	COG1175G	core	N-Acetyl-D-glucosamine ABC transport system, permease protein 1	ABC transporter sugar-family permease		293.45	47.4267	-2.62934	11.6566	0	0
VBICloDif38397_2673	CD2550	2949671	2950948	1278	-	19443573	400927455	-	core	putative sugar transporter, substrate-binding lipoprotein	ABC transporter sugar-family extracellular solute-binding protein		2612.95	188.059	-3.79642	19.1061	0	0
VBICloDif38397_2678	CD2556	2955773	2957692	1920	-	19443583	126700174	COG3711K	core	FIG00517988: hypothetical protein	PTS system fructose/mannitol-family transporter subunit IIAB		16.771	3.91333	-2.0995	6.77694	1.22746e-11	6.93936e-11
VBICloDif38397_2685	CD2562A	2964187	2964375	189	+	19443597	126700181	COG0227J	core	LSU ribosomal protein L28p	50S ribosomal protein L28	rpmB	12695.6	3721.42	-1.77041	6.92029	4.50706e-12	2.66674e-11
VBICloDif38397_2688	CD2564	2965480	2966241	762	+	19443603	126700183	COG0789K	core	Transcriptional activator tipA	MerR family transcriptional regulator		25.9151	80.3008	1.63162	-5.72801	1.01614e-08	4.47201e-08
VBICloDif38397_2689	CD2565	2966501	2968429	1929	-	19443605	126700184	COG3711K	core	FIG00513656: hypothetical protein	transcription antiterminator		0.551288	1.93914	1.81454	-2.78844	0.00529633	0.0109946
VBICloDif38397_2690	CD2566	2968663	2969115	453	+	19443607	126700185	COG1762GT	core	PTS system, fructose-specific IIA component (EC 2.7.1.69) / PTS system, fructose-specific IIB component (EC 2.7.1.69) / PTS system, fructose-specific IIC component (EC 2.7.1.69)	PTS system mannose-specfic transporter subunit IIA		1.28932	7.44218	2.52912	-2.37121	0.0177302	0.0326507
VBICloDif38397_2691	CD2567	2969118	2969426	309	+	19443609	126700186	COG1445G	core	PTS system, fructose-specific IIBC component (EC 2.7.1.69)	PTS system mannose-specfic transporter subunit IIB		5.59246	27.9461	2.32109	-3.04952	0.00229207	0.00505934
VBICloDif38397_2692	CD2568	2969540	2970646	1107	+	19443611	126700187	COG1299G	core	PTS system, fructose-specific IIBC component (EC 2.7.1.69)	PTS system mannose-specfic transporter subunit IIC		3.26909	22.5228	2.78442	-7.26056	3.85469e-13	2.47871e-12
VBICloDif38397_2693	CD2569	2970721	2973399	2679	+	19443613	126700188	COG0383G	core	Alpha-mannosidase (EC 3.2.1.24)	alpha-mannosidase		3.82206	14.1093	1.88422	-6.0941	1.10052e-09	5.30277e-09
VBICloDif38397_2696	CD2572	2977154	2977810	657	-	19443619	126700191	COG0778C	core	putative nitroreductase	nitroreductase		250.382	729.39	1.54256	-7.19544	6.22613e-13	3.93952e-12
VBICloDif38397_2697	CD2573	2977865	2978494	630	-	19443621	126700192	COG0546R	core	5'-methylthioadenosine nucleosidase (EC 3.2.2.16) / S-adenosylhomocysteine nucleosidase (EC 3.2.2.9)	"hydrolase, HAD superfamily, subfamily IA"		15.5157	44.0734	1.50618	-4.52701	5.9823e-06	1.95884e-05
VBICloDif38397_2720	CD2595	3003588	3004121	534	-	19443667	126700215	COG2065F	core	Uracil phosphoribosyltransferase (EC 2.4.2.9) / Pyrimidine operon regulatory protein PyrR	bifunctional pyrimidine operon regulatory protein/uracil phosphoribosyltransferase	pyrR	327.719	110.603	-1.56707	6.85531	7.11609e-12	4.14833e-11
VBICloDif38397_2725	CD2600	3007735	3009156	1422	-	19443677	126700220	COG1966T	core	Carbon starvation protein A	"carbon starvation protein, CstA"		696.837	143.916	-2.2756	11.4579	0	0
VBICloDif38397_2728	CD2603	3012145	3012891	747	+	19443683	126700223	COG3279KT	core	FIG00514917: hypothetical protein	"Clostridium difficile binary toxin regulatory gene, LytTR family"		3.78294	13.787	1.86573	-4.19115	2.7754e-05	8.32854e-05
VBICloDif38397_2747	CD2624	3030985	3031620	636	-	19443721	126700238	-	core	FIG00513367: hypothetical protein	hypothetical protein		11.3509	42.612	1.90846	-5.31117	1.08924e-07	4.29892e-07
VBICloDif38397_2748	CD2625	3032001	3033041	1041	+	19443723	126700239	COG1299G	core	Perfringolysin O regulator protein PfoR	membrane protein		39.4713	1742.13	5.4639	-19.7959	0	0
VBICloDif38397_2775	CD2651	3058332	3059558	1227	-	19443777	126700265	COG0707M	core	UDP-N-acetylglucosamine--N-acetylmuramyl-(pentapeptide) pyrophosphoryl-undecaprenol N-acetylglucosamine transferase (EC 2.4.1.227)	UDP-N-acetylglucosamine-N-acetylmuramyl- (pentapeptide) pyrophosphoryl-undecaprenol N- acetylglucosamine transferase	murG	500.52	165.179	-1.5994	8.00493	1.11022e-15	8.41781e-15
VBICloDif38397_2777	CD2653	3060758	3062113	1356	-	19443781	126700267	COG0771M	core	UDP-N-acetylmuramoylalanine--D-glutamate ligase (EC 6.3.2.9)	UDP-N-acetylmuramoylalanine--D-glutamate ligase (UDP-N-acetylmuramoyl-L-alanyl-D-glutamate synthetase) (D-glutamic acid-adding enzyme)	murD	476.947	141.298	-1.75509	8.80645	0	0
VBICloDif38397_2782	CD2658	3067500	3068435	936	-	19443791	126700272	COG0275M	core	rRNA small subunit methyltransferase H	16S rRNA m(4)C1402 methyltransferase	mraW	172.892	26.1062	-2.72741	11.3325	0	0
VBICloDif38397_2783	CD2659	3068465	3069211	747	-	19443793	126700273	COG0682M	core	Prolipoprotein diacylglyceryl transferase (EC 2.4.99.-)	prolipoprotein diacylglyceryl transferase	lgt	53.4669	12.7758	-2.06523	6.74162	1.56635e-11	8.77154e-11
VBICloDif38397_2786	CD2662	3072487	3073584	1098	+	19443799	126700276	COG0012J	core	GTP-binding and nucleic acid-binding protein YchF	GTP-binding protein YchF		321.404	103.189	-1.6391	7.83811	4.66294e-15	3.40481e-14
VBICloDif38397_2787	CD2663	3074062	3076341	2280	-	19443801	126700277	COG2200T	core	FIG00513807: hypothetical protein	signaling protein		56.5671	172.017	1.60451	-7.39533	1.40998e-13	9.35429e-13
VBICloDif38397_2788	CD2664	3076612	3078066	1455	-	19443803	126700278	COG0769M	core	UDP-N-acetylmuramoylalanyl-D-glutamate--2,6-diaminopimelate ligase (EC 6.3.2.13)	"UDP-N-acetylmuramoylalanyl-D-glutamate--2,6-diaminopimelate ligase"	murE	1330.3	77.3239	-4.1047	20.1487	0	0
VBICloDif38397_2790	CD2666	3079312	3079803	492	-	19443807	126700280	COG2190G	core	PTS system, glucose-specific IIA component (EC 2.7.1.69)	PTS system glucose-specific transporter subunit IIA	crr	15082.5	266.027	-5.82516	27.9039	0	0
VBICloDif38397_2791	CD2667	3079813	3081384	1572	-	19443809	126700281	COG1263G	core	PTS system, glucose-specific IIB component (EC 2.7.1.69) / PTS system, glucose-specific IIC component (EC 2.7.1.69)	PTS system glucose-specific transporter subunit IIBC	ptsG	4090.89	156.63	-4.70698	23.2378	0	0
VBICloDif38397_2792	CD2668	3081687	3082529	843	-	19443811	126700282	COG3711K	core	Beta-glucoside bgl operon antiterminator, BglG family	"transcription antiterminator, licT family"	licT	329.83	106.166	-1.6354	7.3133	2.6068e-13	1.70714e-12
VBICloDif38397_2793	CD2669a	3082790	3084832	2043	-	19443813	126700283	COG0025P	core	Na+/H+ antiporter	Na(+)/H(+) antiporter		1014.14	156.059	-2.70009	13.2798	0	0
VBICloDif38397_2794	CD2670	3084984	3085955	972	-	19443815	126700284	COG4608E	core	Oligopeptide transport ATP-binding protein OppF (TC 3.A.1.5.1)	ABC transporter ATP-binding protein; putative oligopeptide transport system	appF	1938.82	200.927	-3.27043	16.3715	0	0
VBICloDif38397_2795	CD2671	3085956	3086933	978	-	19443817	126700285	COG0444EP	core	Oligopeptide transport ATP-binding protein OppD (TC 3.A.1.5.1)	ABC transporter ATP-binding protein; putative oligopeptide transport system	appD	798.242	105.218	-2.92344	14.135	0	0
VBICloDif38397_2802	CD2678	3093907	3094572	666	+	19443831	126700292	COG2057I	core	Butyrate-acetoacetate CoA-transferase subunit B (EC 2.8.3.9)	succinyl CoA:3-oxoacid CoA-transferase subunit B	ctfB	0.272949	3.00263	3.45953	-2.2442	0.0248197	0.0442621
VBICloDif38397_2803	CD2679	3094677	3095453	777	+	19443833	126700293	COG1028IQR	core	D-beta-hydroxybutyrate dehydrogenase (EC 1.1.1.30)	3-hydroxybutyrate dehydrogenase	bdhA	3.10108	14.8186	2.25657	-4.82188	1.4221e-06	5.02684e-06
VBICloDif38397_2804	CD2680	3095530	3096864	1335	+	19443835	126700294	COG2610GE	core	D-beta-hydroxybutyrate permease	permease		1.06613	3.74091	1.811	-3.16329	0.00155997	0.00352207
VBICloDif38397_2807	CD2683	3102742	3103311	570	-	19443841	126700297	COG4869Q	core	Ethanolamine utilization protein similar to PduL	propanediol utilization phosphotransacylase		4221.17	1333.32	-1.66262	7.94319	1.9984e-15	1.48979e-14
VBICloDif38397_2820	CD2695	3113762	3114763	1002	-	19443867	400927470	-	core	Aspartate--ammonia ligase (EC 6.3.1.1)	Aspartate--ammonia ligase (Asparagine synthetase A)	asnA	435.249	104.614	-2.05677	9.8322	0	0
VBICloDif38397_2829	CD2704	3125620	3126963	1344	+	19443885	126700318	COG2252R	core	Xanthine/uracil/thiamine/ascorbate permease family protein	permease		359.998	45.8529	-2.97291	13.8005	0	0
VBICloDif38397_2830	CD2705	3127142	3128506	1365	+	19443887	126700319	COG0402FR	core	S-adenosylhomocysteine deaminase (EC 3.5.4.28); Methylthioadenosine deaminase	amidohydrolase		257.17	38.9532	-2.72291	12.512	0	0
VBICloDif38397_2840	CD2715	3141599	3142543	945	-	19443907	126700329	COG1210M	core	UTP--glucose-1-phosphate uridylyltransferase (EC 2.7.7.9)	UTP--glucose-1-phosphate uridylyltransferase	gtaB	602.386	191.199	-1.65561	8.24123	2.22045e-16	1.72777e-15
VBICloDif38397_2853	CD2726	3162737	3163981	1245	-	19443939	126700341	COG0112E	core	Serine hydroxymethyltransferase (EC 2.1.2.1)	serine hydroxymethyltransferase	glyA	1209.19	187.386	-2.68995	13.6147	0	0
VBICloDif38397_2861	CD2734	3170622	3172064	1443	+	19443955	126700349	COG1757C	core	FIG00512915: hypothetical protein	"Na+/H+ antiporter, NhaC family"	mleN	5.6242	21.3932	1.92743	-5.89972	3.64128e-09	1.66432e-08
VBICloDif38397_2864	CD2737	3175193	3175999	807	-	19443961	126700352	COG0388R	core	Nitrilase/cyanide hydratase and apolipoprotein N-acyltransferase	nitrilase/cyanide hydratase and apolipoprotein N-acyltransferase		82.0121	308.466	1.9112	-8.42634	0	0
VBICloDif38397_2865	CD2738	3176013	3177245	1233	-	19443963	126700353	COG1457F	core	Cytosine permease	cytosine permease		17.0098	51.3514	1.59404	-5.75288	8.77333e-09	3.89488e-08
VBICloDif38397_2879	CD2752	3195904	3196569	666	+	19443991	126700368	-	core	FIG00521194: hypothetical protein	hypothetical protein		11.4928	14628.5	10.3138	-27.7115	0	0
VBICloDif38397_2881	CD2754	3199803	3201353	1551	-	19443995	126700370	COG2199T	unique	Sensory box/GGDEF family protein	diguanylate kinase signaling protein		87.4644	26.507	-1.72232	7.51608	5.63993e-14	3.85685e-13
VBICloDif38397_2882	CD2755	3201676	3203388	1713	-	19443997	126700371	COG1080G	core	Phosphoenolpyruvate-protein phosphotransferase of PTS system (EC 2.7.3.9)	phosphoenolpyruvate-protein phosphotransferase	ptsI	1833.33	327.03	-2.48697	11.7759	0	0
VBICloDif38397_2883	CD2756	3203742	3204002	261	-	19443999	126700372	COG1925G	core	Phosphotransferase system, phosphocarrier protein HPr	PTS system HPr protein	ptsH	12476	1054.46	-3.56458	17.2306	0	0
VBICloDif38397_2885	CD2758	3205638	3207371	1734	-	19444003	126700374	COG0286V	core	Modification methylase bstVI (EC 2.1.1.72)	"N6 adenine-specific DNA methyltransferase, N12 class"		5.4479	17.758	1.7047	-5.28382	1.26515e-07	4.96564e-07
VBICloDif38397_2891	CD2764	3211998	3212786	789	-	19444015	126700380	COG0561R	core	FIG00521708: hypothetical protein	"hydrolase, HAD superfamily, IIB subfamily"		256.504	33.1708	-2.95099	12.3447	0	0
VBICloDif38397_2893	CD2766	3214521	3215360	840	+	19444019	126700382	COG1316K	core	Cell envelope-associated transcriptional attenuator LytR-CpsA-Psr, subfamily F1 (as in PMID19099556)	LytR family transcriptional regulator		1257.24	270.8	-2.21496	11.1439	0	0
VBICloDif38397_2897	CD2770	3220874	3221965	1092	-	19444027	126700386	COG0438M	core	putative capsular polysaccharide biosynthesis glycosyl transferase	group 1 glycosyl transferase		324.355	101.917	-1.67018	8.01384	1.11022e-15	8.41781e-15
VBICloDif38397_2898	CD2771	3221971	3223266	1296	-	19444029	126700387	COG1004M	core	UDP-glucose dehydrogenase (EC 1.1.1.22)	UDP-glucose 6-dehydrogenase	rkpK	339.793	105.922	-1.68165	8.23808	2.22045e-16	1.72777e-15
VBICloDif38397_2900	CD2773	3224092	3225000	909	-	19444033	126700389	COG0463M	core	glycosyl transferase, family 2	family 2 glycosyl transferase		232.035	69.0295	-1.74906	7.92452	2.22045e-15	1.64841e-14
VBICloDif38397_2901	CD2774	3225022	3225771	750	-	19444035	126700390	COG0463M	core	Putative N-acetylgalactosaminyl-diphosphoundecaprenol glucuronosyltransferase	family 2 glycosyl transferase		304.022	106.558	-1.51254	6.92834	4.25815e-12	2.52366e-11
VBICloDif38397_2911	CD2784	3236313	3238337	2025	-	19444055	126700400	COG0860M	core	N-acetylmuramoyl-L-alanine amidase (EC 3.5.1.28)	"N-acetylmuramoyl-L-alanine amidase,autolysin"		1339.33	385.669	-1.79607	8.22391	2.22045e-16	1.72777e-15
VBICloDif38397_2919	CD2792	3249969	3252314	2346	-	19444071	126700408	COG0653U	core	Protein export cytoplasm protein SecA ATPase RNA helicase (TC 3.A.5.1.1)	protein translocase subunit secA 2	secA2	842.923	160.828	-2.38988	11.6703	0	0
VBICloDif38397_2923	CD2796	3258702	3260582	1881	-	19444079	400927474	-	core	N-acetylmuramoyl-L-alanine amidase (EC 3.5.1.28)	cell surface protein		532.793	137.555	-1.95357	9.84227	0	0
VBICloDif38397_2924	CD2797	3260792	3266755	5964	-	19444081	126700413	-	core	FIG00516487: hypothetical protein	calcium-binding adhesion protein		540.34	137.253	-1.97703	8.83255	0	0
VBICloDif38397_2925	CD2798	3267136	3268539	1404	-	19444083	400927475	-	core	Cwp66 homolog/N-acetylmuramoyl-L-alanine amidase (EC 3.5.1.28)	cell wall binding protein		131.469	41.0055	-1.68083	7.59867	2.9976e-14	2.06579e-13
VBICloDif38397_2929	CD2801	3272149	3272442	294	-	19444091	126700417	COG1862U	core	Preprotein translocase subunit YajC (TC 3.A.5.1.1)	hypothetical protein		12865.9	3336.48	-1.94716	9.65441	0	0
VBICloDif38397_2930	CD2802	3272576	3273697	1122	-	19444093	400927477	-	core	tRNA-guanine transglycosylase (EC 2.4.2.29)	Queuine tRNA-ribosyltransferase (tRNA-guanine transglycosylase) (Guanine insertion enzyme)	tgt	318.9	71.2057	-2.16304	10.2087	0	0
VBICloDif38397_2931	CD2803	3273776	3274261	486	-	19444095	126700419	-	core	FIG00516124: hypothetical protein	membrane protein		501.49	97.118	-2.36841	10.2398	0	0
VBICloDif38397_2932	CD2804	3274273	3275298	1026	-	19444097	126700420	COG0809J	core	S-adenosylmethionine:tRNA ribosyltransferase-isomerase (EC 5.-.-.-)	S-adenosylmethionine--tRNA ribosyltransferase-isomerase	queA	298.173	72.7365	-2.0354	9.49975	0	0
VBICloDif38397_2934	CD2806	3276742	3277344	603	-	19444101	400927478	-	core	Holliday junction DNA helicase RuvA	Holliday junction ATP-dependent DNA helicase RuvA	ruvA	95.1362	30.1108	-1.65971	6.02234	1.71917e-09	8.17297e-09
VBICloDif38397_2935	CD2807	3277337	3277846	510	-	19444103	126700423	COG0817L	core	Crossover junction endodeoxyribonuclease RuvC (EC 3.1.22.4)	Holliday junction resolvase	ruvC	101.666	29.1119	-1.80415	6.19211	5.93639e-10	2.95242e-09
VBICloDif38397_2938	CD2811	3280621	3282057	1437	-	19444109	126700427	COG3395S	core	FIG00513391: hypothetical protein	hypothetical protein		2.9125	10.1457	1.80054	-4.72581	2.292e-06	7.9749e-06
VBICloDif38397_2939	CD2812	3282128	3283510	1383	-	19444111	126700428	COG2610GE	core	Gluconate permease	gluconate permease		1.75749	6.48198	1.88292	-4.23607	2.27462e-05	6.93701e-05
VBICloDif38397_2940	CD2813	3283646	3284536	891	-	19444113	126700429	COG2084I	core	2-hydroxy-3-oxopropionate reductase (EC 1.1.1.60)	tartronate semialdehyde reductase	garR	0.49973	5.04064	3.33439	-3.27628	0.00105185	0.0024398
VBICloDif38397_2943	CD2816	3286531	3286839	309	+	19444119	126700432	-	core	FIG00516231: hypothetical protein	hypothetical protein		30.866	108.304	1.811	-4.77142	1.82933e-06	6.42161e-06
VBICloDif38397_2944	CD2817	3287001	3288791	1791	-	19444121	126700433	COG1132V	core	ABC transporter, ATP-binding/permease protein	ABC transporter multidrug-family ATP-binding/permease		122.137	33.8235	-1.85241	8.49649	0	0
VBICloDif38397_2945	CD2818	3288791	3290518	1728	-	19444123	400927481	-	core	Lipid A export ATP-binding/permease protein MsbA	ABC transporter multidrug-family ATP-binding/permease		69.4317	24.2942	-1.51498	6.58049	4.68907e-11	2.53795e-10
VBICloDif38397_2947	CD2819	3291318	3292430	1113	+	19444127	126700435	COG3616E	core	putative amino acid racemase	amino acid racemase		14.6417	58.4891	1.99808	-6.91175	4.78706e-12	2.81834e-11
VBICloDif38397_2955	CD2828	3300169	3301359	1191	+	19444143	126700444	COG0436E	core	Biosynthetic Aromatic amino acid aminotransferase alpha (EC 2.6.1.57) @ Aspartate aminotransferase (EC 2.6.1.1)	aspartate aminotransferase		5.92791	346.33	5.86848	-17.8487	0	0
VBICloDif38397_2958	CD2831	3303646	3306564	2919	-	19444149	126700447	COG4932M	core	FIG00515698: hypothetical protein	adhesin		29.5423	90.2341	1.61089	-7.40693	1.2923e-13	8.58957e-13
VBICloDif38397_2969	CD2841	3322277	3323881	1605	-	19444171	126700457	COG1574R	core	Exoenzymes regulatory protein AepA in lipid-linked oligosaccharide synthesis cluster	amidohydrolase		156.748	36.9978	-2.08294	9.56691	0	0
VBICloDif38397_2974	CD2846	3327825	3328445	621	-	19444181	126700462	-	core	FIG00512801: hypothetical protein	hypothetical protein		2.0967	7.97478	1.92733	-2.97961	0.00288618	0.00623527
VBICloDif38397_2977	CD2849	3330441	3332351	1911	-	19444187	126700465	COG0075E	core	2-aminoethylphosphonate:pyruvate aminotransferase (EC 2.6.1.37)	bifunctional phosphonoacetaldehyde hydrolase/aminoethylphosphonate transaminase		147.541	29.3611	-2.32914	10.6623	0	0
VBICloDif38397_2983	CD2854	3336664	3337854	1191	-	19444199	126700470	COG3966M	core	Poly(glycerophosphate chain) D-alanine transfer protein DltD	D-alanine transferase DltD	dltD	554.826	187.335	-1.56641	7.87421	3.33067e-15	2.45214e-14
VBICloDif38397_2998	CD2869	3355468	3357360	1893	+	19444229	400927486	-	core	Propionate catabolism operon regulatory protein PrpR	sigma-54 dependent transcriptional regulator		45.4209	13.7375	-1.72523	7.07175	1.52989e-12	9.42856e-12
VBICloDif38397_3012	CD2883	3371364	3372677	1314	-	19444257	126700499	COG1455G	core	PTS system, cellobiose-specific IIC component (EC 2.7.1.69)	PTS system cellobiose-specific transporter subunit IIC	celB	9.68303	38.7366	2.00017	-6.64587	3.01439e-11	1.65419e-10
VBICloDif38397_3017	CD2888	3377100	3378818	1719	-	19444267	126700504	COG1178P	core	Ferric iron ABC transporter, permease protein	ABC transporter iron-family permease		23.3763	5.39933	-2.11419	7.17384	7.29194e-13	4.60571e-12
VBICloDif38397_3022	CD2892	3382269	3382865	597	-	19444277	126700508	-	unique	hypothetical protein	hypothetical protein		53.933	157.985	1.55055	-5.5539	2.79369e-08	1.16055e-07
VBICloDif38397_3035	CD2903	3390428	3392398	1971	-	19444303	126700520	COG0791M	core	Phage-like element PBSX protein xkdQ	tail protein		0.936134	3.38576	1.85469	-3.822	0.000132376	0.000353931
VBICloDif38397_3059	CD2924	3410090	3410317	228	-	19444351	126700542	-	unique	hypothetical protein	hypothetical protein		1868.47	11907.6	2.67196	-11.2963	0	0
VBICloDif38397_3098	CD2954	3430420	3431088	669	-	19444429	126700573	COG1394C	core	V-type ATP synthase subunit D (EC 3.6.3.14)	V-type ATP synthase subunit D	ntpD	66.8812	420.173	2.65131	-10.9179	0	0
VBICloDif38397_3099	CD2955	3431094	3432467	1374	-	19444431	126700574	COG1156C	core	V-type ATP synthase subunit B (EC 3.6.3.14)	V-type ATP synthase subunit B	ntpB	144.595	541.57	1.90513	-8.5191	0	0
VBICloDif38397_3100	CD2956	3432464	3434242	1779	-	19444433	126700575	COG1155C	core	V-type ATP synthase subunit A (EC 3.6.3.14)	V-type ATP synthase subunit A	ntpA	117.796	382.871	1.70056	-7.67388	1.66533e-14	1.17266e-13
VBICloDif38397_3101	CD2956A	3434359	3434676	318	-	19444435	400927497	-	core	V-type ATP synthase subunit F (EC 3.6.3.14)	V-type ATP synthase subunit F	ntpG	26.5186	151.697	2.51612	-6.65923	2.7526e-11	1.51521e-10
VBICloDif38397_3102	CD2957	3434669	3435646	978	-	19444437	126700577	COG1527C	core	V-type ATP synthase subunit C (EC 3.6.3.14)	V-type ATP synthase subunit C	ntpC	29.9301	215.613	2.84878	-11.0007	0	0
VBICloDif38397_3103	CD2958	3435661	3436224	564	-	19444439	126700578	COG1390C	core	V-type ATP synthase subunit E (EC 3.6.3.14)	V-type ATP synthase subunit E (V-type ATPase subunit E)	ntpE	47.8547	206.823	2.11166	-7.74691	9.32587e-15	6.68605e-14
VBICloDif38397_3104	CD2959	3436276	3436767	492	-	19444441	126700579	-	core	V-type ATP synthase subunit K (EC 3.6.3.14)	V-type ATP synthase subunit K	ntpK	112.089	449.838	2.00476	-8.27161	2.22045e-16	1.72777e-15
VBICloDif38397_3105	CD2960	3436770	3438695	1926	-	19444443	126700580	COG1269C	core	V-type ATP synthase subunit I (EC 3.6.3.14)	V-type sodium ATP synthase subunit I	ntpI	136.299	485.639	1.83311	-8.06987	6.66134e-16	5.09413e-15
VBICloDif38397_3107	CD2962	3439638	3439913	276	-	19444447	126700582	-	core	FIG00521269: hypothetical protein	hypothetical protein		58.6302	176.952	1.59365	-4.4779	7.53822e-06	2.43912e-05
VBICloDif38397_3111	CD2966	3445219	3447873	2655	-	19444455	126700586	COG1454C	core	Alcohol dehydrogenase (EC 1.1.1.1); Acetaldehyde dehydrogenase (EC 1.2.1.10)	bifunctional acetaldehyde-CoA/alcohol dehydrogenase	adhE	3276.25	81.8254	-5.32335	26.1402	0	0
VBICloDif38397_3114	CD2969	3450328	3451719	1392	-	19444461	126700590	COG0318IQ	core	Long-chain-fatty-acid--CoA ligase (EC 6.2.1.3)	AMP-binding protein		4.10604	12.6668	1.62523	-4.1822	2.88698e-05	8.65607e-05
VBICloDif38397_3118	CD2973	3454994	3455422	429	-	19444469	126700595	COG0456R	core	putative acetyltransferase	acetyltransferase		10.1198	38.022	1.90965	-4.23497	2.28586e-05	6.96532e-05
VBICloDif38397_3119	CD2975	3456942	3457208	267	-	19444471	400927499	-	core	CRISPR-associated protein Cas2	CRISPR-associated Cas2 family protein		4.43208	42.4483	3.25965	-2.85282	0.00433332	0.00912331
VBICloDif38397_3120	CD2976	3457211	3458191	981	-	19444473	126700597	COG1518L	core	CRISPR-associated protein Cas1	CRISPR-associated Cas1 family protein		14.847	99.4469	2.74376	-9.32941	0	0
VBICloDif38397_3121	CD2977	3458194	3458745	552	-	19444475	126700598	COG1468L	core	CRISPR-associated RecB family exonuclease Cas4a	CRISPR-associated Cas4 family protein		65.6022	270.143	2.04191	-7.80323	5.9952e-15	4.34194e-14
VBICloDif38397_3122	CD2978	3458760	3461081	2322	-	19444477	126700599	COG1203R	core	CRISPR-associated helicase Cas3	CRISPR-associated Cas3 family helicase		37.3393	176.442	2.24043	-9.77692	0	0
VBICloDif38397_3123	CD2979	3461092	3461793	702	-	19444479	126700600	COG1688L	core	CRISPR-associated protein MTH1087	CRISPR-associated Cas5 family protein		18.6343	74.692	2.00299	-6.39827	1.57143e-10	8.16958e-10
VBICloDif38397_3124	CD2980	3461795	3462709	915	-	19444481	126700601	COG1857L	core	CRISPR-associated negative autoregulator	CRISPR-associated autoregulator DevR family protein		27.1249	137.486	2.3416	-8.72318	0	0
VBICloDif38397_3125	CD2981	3462711	3464588	1878	-	19444483	126700602	-	core	FIG00774117: hypothetical protein	"CRISPR-associated protein, CXXC-CXXC"		6.68802	50.627	2.92026	-9.79886	0	0
VBICloDif38397_3126	CD2982	3464594	3465331	738	-	19444485	126700603	COG1583L	core	FIG00512894: hypothetical protein	CRISPR-associated Cas6 family protein		30.2355	109.666	1.85881	-6.67407	2.4881e-11	1.37386e-10
VBICloDif38397_3127	CD2983	3465409	3466296	888	-	19444487	126700604	COG2378K	core	FIG00513449: hypothetical protein	Helix-Turn-Helix DNA-binding protein		3.69552	29.3785	2.99091	-7.03882	1.93867e-12	1.18452e-11
VBICloDif38397_3141	CD2997	3481277	3482473	1197	-	19444515	126700618	COG1120PH	core	Vitamin B12 ABC transporter, ATPase component BtuD	ABC transporter iron-family ATP-binding protein		123.179	38.586	-1.67461	7.35922	1.84963e-13	1.22028e-12
VBICloDif38397_3143	CD2999	3483573	3484703	1131	-	19444519	126700620	COG0614P	core	Vitamin B12 ABC transporter, B12-binding component BtuF	ABC transporter iron-family extracellular solute-binding protein		175.878	33.5707	-2.3893	10.4763	0	0
VBICloDif38397_3148	CD3004	3488809	3489783	975	-	19444529	126700625	-	core	2-keto-3-deoxygluconate permease (KDG permease)	2-keto-3-deoxygluconate permease		2.31182	7.07004	1.61269	-3.42225	0.000621055	0.00150955
VBICloDif38397_3156	CD3012	3498572	3501172	2601	-	19444545	126700632	COG0383G	core	Alpha-mannosidase (EC 3.2.1.24)	alpha-mannosidase		144.703	2889.71	4.31976	-15.8494	0	0
VBICloDif38397_3157	CD3013	3501292	3502392	1101	-	19444547	126700633	COG1299G	core	PTS system, fructose-specific IIBC component (EC 2.7.1.69)	PTS system mannose-specfic transporter subunit IIC		206.024	3461.83	4.07065	-15.6921	0	0
VBICloDif38397_3158	CD3014	3502408	3502728	321	-	19444549	126700634	COG1445G	core	PTS system, fructose-specific IIB component (EC 2.7.1.69)	PTS system mannose-specfic transporter subunit IIB		441.924	5422.52	3.61709	-15.0281	0	0
VBICloDif38397_3159	CD3015	3502731	3503192	462	-	19444551	126700635	COG1762GT	core	PTS system, fructose-specific IIA component (EC 2.7.1.69) / PTS system, fructose-specific IIB component (EC 2.7.1.69) / PTS system, fructose-specific IIC component (EC 2.7.1.69)	PTS system mannose-specfic transporter subunit IIA		157.462	2097.15	3.73536	-15.0376	0	0
VBICloDif38397_3160	CD3016	3503192	3505156	1965	-	19444553	126700636	COG3711K	core	Transcription antiterminator, BglG family	PTS operon transcription antiterminator		70.726	1822.67	4.68767	-17.5887	0	0
VBICloDif38397_3170	CD3026	3514904	3515650	747	-	19444573	126700644	COG3860S	core	FIG00519100: hypothetical protein	hypothetical protein		32.9025	9.7846	-1.74961	5.19698	2.02547e-07	7.76977e-07
VBICloDif38397_3171	CD3027	3516009	3516479	471	-	19444575	126700645	COG2190G	core	PTS system, glucose-specific IIA component (EC 2.7.1.69)	PTS system glucose-like transporter subunit IIA	crr	3234.68	83.555	-5.27475	23.334	0	0
VBICloDif38397_3172	CD3028	3516503	3517102	600	-	19444577	126700646	COG0794M	core	Arabinose 5-phosphate isomerase (EC 5.3.1.13)	phosphosugar isomerase		1170.34	32.8234	-5.15606	21.246	0	0
VBICloDif38397_3173	CD3029	3517120	3518304	1185	-	19444579	126700647	COG1168E	core	Cystathionine beta-lyase (EC 4.4.1.8) (CBL) (Beta-cystathionase) (Cysteine lyase) / Maltose regulon modulator	bifunctional protein: cystathionine beta-lyase / repressor	malY	341.571	12.0092	-4.82998	19.3767	0	0
VBICloDif38397_3174	CD3030	3518297	3519874	1578	-	19444581	126700648	COG1263G	core	PTS system, maltose and glucose-specific IIC component (EC 2.7.1.69) / PTS system, maltose and glucose-specific IIB component (EC 2.7.1.69)	PTS system glucose-like transporter subunit IIBC	malX	1572.42	74.2755	-4.40396	21.6048	0	0
VBICloDif38397_3175	CD3031	3520227	3521063	837	-	19444583	126700649	COG3711K	core	Beta-glucoside bgl operon antiterminator, BglG family	PTS operon transcription antiterminator		1465.24	408.971	-1.84106	8.95137	0	0
VBICloDif38397_3180	CD3036	3525860	3527179	1320	-	19444593	126700654	COG3104E	core	Di-/tripeptide transporter	"transporter, Major Facilitator Superfamily (MFS)"		852.121	109.07	-2.9658	14.7831	0	0
VBICloDif38397_3192	CD3048	3541901	3543247	1347	-	19444617	126700666	COG1455G	core	PTS system, cellobiose-specific IIC component (EC 2.7.1.69)	PTS system lactose/cellobiose-family transporter subunit IIC		1.06913	3.80716	1.83227	-3.22879	0.00124316	0.00283922
VBICloDif38397_3204	CD3060	3552857	3554188	1332	-	19444641	126700677	COG1486G	core	Maltose-6'-phosphate glucosidase (EC 3.2.1.122)	phospho-alpha-glucosidase	glvA	4.14593	12.4079	1.58149	-4.36082	1.29578e-05	4.08856e-05
VBICloDif38397_3205	CD3061	3554202	3555767	1566	-	19444643	126700678	COG1263G	core	PTS system, maltose and glucose-specific IIC component (EC 2.7.1.69) / PTS system, maltose and glucose-specific IIB component (EC 2.7.1.69)	PTS system alpha-glucoside-specific transporter subunit IICB	glvC	0.603616	5.89839	3.28862	-4.94071	7.78373e-07	2.8129e-06
VBICloDif38397_3216	CD3072	3568501	3569022	522	-	19444665	126700689	COG5418S	core	FIG00518140: hypothetical protein	hypothetical protein		773.043	191.663	-2.01198	9.36453	0	0
VBICloDif38397_3225	CD3081	3577719	3578951	1233	-	19444683	126700698	COG1455G	core	PTS system, cellobiose-specific IIC component (EC 2.7.1.69)	PTS system lactose/cellobiose-family transporter subunit IIC		0.645221	3.19805	2.30932	-3.01065	0.00260691	0.00568025
VBICloDif38397_3230	CD3086	3585761	3587686	1926	-	19444693	126700703	COG1299G	core	PTS system HrsA EIIA component / PTS system HrsA EIIB component / PTS system HrsA permease IIC component	PTS system 2-O-a-mannosyl-D-glycerate specific transporter subunit IIABC	hrsA	2.74338	8.38991	1.6127	-4.43523	9.19756e-06	2.95185e-05
VBICloDif38397_3232	CD3088	3588804	3589574	771	-	19444697	126700705	COG3394S	core	Cellobiose phosphotransferase system YdjC-like protein	cellobiose-phosphate degrading protein		13.8528	93.1989	2.75014	-8.77286	0	0
VBICloDif38397_3233	CD3089	3589576	3591024	1449	-	19444699	126700706	COG1263G	core	PTS system, N-acetylglucosamine-specific IIA component (EC 2.7.1.69) / PTS system, N-acetylglucosamine-specific IIB component (EC 2.7.1.69) / PTS system, N-acetylglucosamine-specific IIC component (EC 2.7.1.69)	PTS system glucose-like transporter subunit IIBC		21.4924	142.576	2.72983	-10.9854	0	0
VBICloDif38397_3237	CD3093	3595436	3596173	738	-	19444707	400927504	-	core	Glutamine amidotransferase, class I	gamma-glutamyl-gamma-aminobutyrate hydrolase		168.014	23.5898	-2.83235	10.848	0	0
VBICloDif38397_3239	CD3095	3598873	3600306	1434	-	19444711	126700712	COG2723G	core	Beta-glucosidase (EC 3.2.1.21); 6-phospho-beta-glucosidase (EC 3.2.1.86)	6-phospho-beta-glucosidase	bglA1	54.9655	4.67903	-3.55424	11.8891	0	0
VBICloDif38397_3240	CD3096	3600322	3601746	1425	-	19444713	126700713	COG2723G	unique	6-phospho-beta-glucosidase (EC 3.2.1.86)	6-phospho-beta-glucosidase	ascB1	44.8771	2.45554	-4.19187	11.5136	0	0
VBICloDif38397_3241	CD3097	3601833	3603749	1917	-	19444715	126700714	COG1263G	core	PTS system, beta-glucoside-specific IIB component (EC 2.7.1.69) / PTS system, beta-glucoside-specific IIC component (EC 2.7.1.69) / PTS system, beta-glucoside-specific IIA component (EC 2.7.1.69)	PTS system beta-glucoside-specific transporter subunit IIABC		24.9937	1.56024	-4.00173	10.4653	0	0
VBICloDif38397_3242	CD3098	3603823	3604683	861	-	19444717	126700715	COG3711K	core	Beta-glucoside bgl operon antiterminator, BglG family	PTS operon transcription antiterminator	bglG1	4.54409	0.630652	-2.84907	2.8523	0.00434039	0.0091328
VBICloDif38397_3243	CD3099	3605034	3606221	1188	-	19444719	126700716	COG1473R	core	Catalyzes the cleavage of p-aminobenzoyl-glutamate to p-aminobenzoate and glutamate, subunit A	"amidohydrolase, M20D family"		496.593	51.1698	-3.2787	15.3841	0	0
VBICloDif38397_3244	CD3100	3606235	3607626	1392	-	19444721	126700717	COG1288S	core	Arginine/ornithine antiporter ArcD	"C4-dicarboxylate anaerobic carrier,DcuC family"		366.677	31.0119	-3.56361	16.2784	0	0
VBICloDif38397_3245	CD3101	3608221	3609873	1653	-	19444723	126700718	COG1263G	core	PTS system, N-acetylglucosamine-specific IIA component (EC 2.7.1.69) / PTS system, N-acetylglucosamine-specific IIB component (EC 2.7.1.69) / PTS system, N-acetylglucosamine-specific IIC component (EC 2.7.1.69)	PTS system glucose-like transporter subunit IIBC		1.61928	13.8202	3.09335	-7.69684	1.39888e-14	9.92898e-14
VBICloDif38397_3247	CD3103	3611561	3612052	492	-	19444727	126700720	COG2190G	core	PTS system, glucose-specific IIA component (EC 2.7.1.69)	PTS system glucose-like transporter subunit IIA		387.712	94.1565	-2.04185	8.74625	0	0
VBICloDif38397_3251	CD3107	3614991	3616535	1545	+	19444735	126700724	COG3711K	core	putative transcription antiterminator	PTS operon transcription antiterminator		6.50105	20.9476	1.68804	-5.16204	2.44273e-07	9.29022e-07
VBICloDif38397_3256	CD3112	3621936	3623126	1191	-	19444745	126700729	COG1473R	core	Catalyzes the cleavage of p-aminobenzoyl-glutamate to p-aminobenzoate and glutamate, subunit A	"peptidase, M20D family"		6.03126	17.5193	1.53841	-4.52221	6.11983e-06	2.0002e-05
VBICloDif38397_3258	CD3114	3624642	3625850	1209	-	19444749	126700731	-	core	FIG00515407: hypothetical protein	membrane protein		1.6125	11.4161	2.8237	-5.93195	2.99358e-09	1.38609e-08
VBICloDif38397_3259	CD3115	3626875	3628329	1455	-	19444751	126700732	COG2723G	core	6-phospho-beta-glucosidase (EC 3.2.1.86)	6-phospho-beta-glucosidase	bglA2	349.783	60.3738	-2.53447	12.1444	0	0
VBICloDif38397_3260	CD3116	3628349	3630220	1872	-	19444753	126700733	COG2190G	core	PTS system, beta-glucoside-specific IIB component (EC 2.7.1.69) / PTS system, beta-glucoside-specific IIC component (EC 2.7.1.69) / PTS system, beta-glucoside-specific IIA component (EC 2.7.1.69)	PTS system beta-glucoside-specific transporter subunit IIABC	bglF	116.653	15.7798	-2.88608	12.5569	0	0
VBICloDif38397_3261	CD3117	3630210	3631070	861	-	19444755	126700734	COG3711K	core	Beta-glucoside bgl operon antiterminator, BglG family	PTS operon transcription antiterminator	bglG	15.5538	4.9157	-1.6618	4.23981	2.23705e-05	6.84002e-05
VBICloDif38397_3269	CD3124	3637050	3638477	1428	-	19444771	126700742	COG2723G	core	Beta-glucosidase (EC 3.2.1.21); 6-phospho-beta-glucosidase (EC 3.2.1.86)	6-phospho-beta-glucosidase	ascB2	60.7768	13.1322	-2.21041	8.66832	0	0
VBICloDif38397_3270	CD3125	3638538	3640466	1929	-	19444773	126700743	COG1263G	core	PTS system, beta-glucoside-specific IIB component (EC 2.7.1.69) / PTS system, beta-glucoside-specific IIC component (EC 2.7.1.69) / PTS system, beta-glucoside-specific IIA component (EC 2.7.1.69)	PTS system beta-glucoside-specific transporter subunit IIABC		64.3489	17.2711	-1.89756	8.14037	4.44089e-16	3.433e-15
VBICloDif38397_3273	CD3128	3643209	3643880	672	-	19444779	126700746	COG0637R	core	Beta-phosphoglucomutase (EC 5.4.2.6)	"Beta-phosphoglucomutase (beta-D-Glucose 1,6-phosphomutase)"	pgmB	1.00458	4.93234	2.29568	-2.59346	0.00950169	0.0187503
VBICloDif38397_3278	CD3133	3649577	3651484	1908	-	19444789	126700751	COG3711K	core	transcription antiterminator	PTS operon transcription antiterminator		0.91825	15.3974	4.06766	-8.75364	0	0
VBICloDif38397_3279	CD3134	3651752	3653647	1896	-	19444791	126700752	COG1299G	core	PTS system, fructose-specific IIA component (EC 2.7.1.69) / PTS system, fructose-specific IIB component (EC 2.7.1.69) / PTS system, fructose-specific IIC component (EC 2.7.1.69)	PTS system fructose-like transporter subunit IIABC		2.11807	21.1569	3.32031	-9.14858	0	0
VBICloDif38397_3280	CD3135	3653683	3654561	879	-	19444793	126700753	COG0191G	core	Fructose-bisphosphate aldolase class II (EC 4.1.2.13)	hypothetical protein		1.15737	20.3147	4.1336	-6.16801	6.91556e-10	3.40135e-09
VBICloDif38397_3281	CD3136	3655266	3656699	1434	-	19444795	126700754	COG2723G	unique	6-phospho-beta-glucosidase (EC 3.2.1.86)	6-phospho-beta-glucosidase	bglA3	1596.54	41.9615	-5.24974	24.7407	0	0
VBICloDif38397_3282	CD3137	3656722	3658563	1842	-	19444797	126700755	COG1263G	unique	PTS system, beta-glucoside-specific IIB component (EC 2.7.1.69) / PTS system, beta-glucoside-specific IIC component (EC 2.7.1.69) / PTS system, beta-glucoside-specific IIA component (EC 2.7.1.69)	PTS system beta-glucoside-specific transporter subunit IIABC		1191.44	13.8507	-6.4266	28.2546	0	0
VBICloDif38397_3283	CD3138	3658689	3659522	834	-	19444799	126700756	COG3711K	unique	Beta-glucoside bgl operon antiterminator, BglG family	PTS operon transcription antiterminator		196.503	19.5518	-3.32918	12.8998	0	0
VBICloDif38397_3288	CD3144	3663220	3664182	963	-	19444809	126700761	COG2378K	core	Transcriptional regulator, DeoR family	DeoR family transcriptional regulator		147.807	38.1651	-1.95339	8.33867	0	0
VBICloDif38397_3289	CD3145	3664944	3668516	3573	-	19444811	126700762	-	unique	Flagellar hook-length control protein FliK	serine-aspartate repeat-containing protein SdrF		703.379	173.644	-2.01817	9.44838	0	0
VBICloDif38397_3314	CD3165	3698796	3699410	615	+	19444861	126700784	COG4335L	core	FIG00520542: hypothetical protein	hypothetical protein		2.44337	36.1105	3.88547	-6.84976	7.39764e-12	4.29837e-11
VBICloDif38397_3315	CD3166	3699428	3699790	363	+	19444863	126700785	COG1733K	shared	Transcriptional regulator, HxlR family	HxlR family transcriptional regulator		50.7409	186.204	1.87566	-5.97458	2.30683e-09	1.0865e-08
VBICloDif38397_3317	CD3168	3701007	3701405	399	+	19444867	126700787	-	core	biphenyl-2,3-diol 1,2-dioxygenase III-related protein VCA0463 VCA0328 VCA0341	hypothetical protein		5.18418	16.2442	1.64774	-2.68503	0.00725228	0.0146631
VBICloDif38397_3320	CD3169A	3702715	3702939	225	-	19444873	126700789	COG1314U	core	Preprotein translocase subunit SecG (TC 3.A.5.1.1)	protein-export membrane protein SecG	secG	1391.79	474.607	-1.55213	5.96371	2.46569e-09	1.15826e-08
VBICloDif38397_3321	CD3170	3703532	3704824	1293	-	19444875	126700790	COG0148G	core	Enolase (EC 4.2.1.11)	enolase (2-phosphoglycerate dehydratase) (2-phospho-D-glycerate hydro-lyase)	eno	5985.56	762.002	-2.97362	13.1459	0	0
VBICloDif38397_3322	CD3171	3705412	3706941	1530	-	19444877	126700791	COG0696G	core	2,3-bisphosphoglycerate-independent phosphoglycerate mutase (EC 5.4.2.1)	phosphoglyceromutase	gpmI	1648.12	203.647	-3.01668	14.8935	0	0
VBICloDif38397_3323	CD3172	3706953	3707696	744	-	19444879	126700792	COG0149G	core	Triosephosphate isomerase (EC 5.3.1.1)	triosephosphate isomerase	tpiA	2914.37	350.776	-3.05456	15.4382	0	0
VBICloDif38397_3324	CD3173	3707722	3708924	1203	-	19444881	126700793	COG0126G	core	Phosphoglycerate kinase (EC 2.7.2.3)	phosphoglycerate kinase	pgk	3435.78	306.355	-3.48736	17.1822	0	0
VBICloDif38397_3325	CD3174	3709146	3710153	1008	-	19444883	126700794	COG0057G	core	NAD-dependent glyceraldehyde-3-phosphate dehydrogenase (EC 1.2.1.12)	glyceraldehyde-3-phosphate dehydrogenase	gapB	16851.3	317.101	-5.73177	27.3082	0	0
VBICloDif38397_3326	CD3175	3710213	3711235	1023	-	19444885	126700795	COG2390K	core	Central glycolytic genes regulator	SorC family transcriptional regulator	cggR	4475.92	112.724	-5.31132	25.6782	0	0
VBICloDif38397_3358	CD3208	3754968	3755264	297	-	19444949	126700827	COG1846K	core	MarR-family transcriptional regulator	MarR family transcriptional regulator		182.029	52.4978	-1.79384	5.44685	5.12689e-08	2.07209e-07
VBICloDif38397_3363	CD3213	3758515	3758766	252	-	19444959	126700832	-	core	FIG00514691: hypothetical protein	hypothetical protein		8.3464	49.7253	2.57475	-3.01278	0.00258864	0.00564878
VBICloDif38397_3364	CD3214	3759095	3759964	870	-	19444961	126700833	COG2207K	core	AraC-family transcriptional regulator	AraC family transcriptional regulator		0.503396	3.48762	2.79248	-2.6501	0.00804679	0.0161846
VBICloDif38397_3382	CD3229	3779042	3779797	756	+	19444997	126700849	COG0289E	core	Dihydrodipicolinate reductase (EC 1.3.1.26)	dihydrodipicolinate reductase 2 (DHPR 2)	dapB2	67.2367	292.103	2.11915	-8.88936	0	0
VBICloDif38397_3384	CD3231	3782205	3782744	540	-	19445001	126700851	COG0634F	core	Hypoxanthine-guanine phosphoribosyltransferase (EC 2.4.2.8)	hypoxanthine phosphoribosyltransferase	hpt	396.789	76.1659	-2.38116	10.2079	0	0
VBICloDif38397_3385	CD3232	3783072	3784379	1308	-	19445003	126700852	COG3681S	core	FIG00517118: hypothetical protein	hypothetical protein		7.36805	6273.17	9.7337	-27.7325	0	0
VBICloDif38397_3389	CD3236	3788847	3789728	882	-	19445011	126700856	COG0730R	core	Integral membrane protein	membrane protein		584.201	3511.08	2.58738	-10.4541	0	0
VBICloDif38397_3390	CD3237	3789848	3790855	1008	-	19445013	126700857	COG3938E	core	Proline racemase (EC 5.1.1.4)	proline racemase	prdF	954.455	7808.14	3.03223	-11.2789	0	0
VBICloDif38397_3392	CD3239	3791375	3791842	468	-	19445017	126700859	-	core	D-proline reductase, 45 kDa subunit (EC 1.21.4.1) / D-proline reductase, 23 kDa subunit (EC 1.21.4.1)	proline reductase PrdE		879.731	3018.37	1.77863	-7.81023	5.77316e-15	4.18966e-14
VBICloDif38397_3393	CD3240	3791857	3792615	759	-	19445019	400927517	-	core	D-proline reductase, 45 kDa subunit (EC 1.21.4.1) / D-proline reductase, 23 kDa subunit (EC 1.21.4.1)	proline reductase PrdD		661.11	3107.54	2.23281	-9.1754	0	0
VBICloDif38397_3394	CD3241	3792695	3793420	726	-	19445021	400927518	-	core	D-proline reductase, 26 kDa subunit (EC 1.21.4.1) @ selenocysteine-containing	proline reductase	prdB	2833.46	10422.9	1.87912	-7.11799	1.09512e-12	6.80815e-12
VBICloDif38397_3395	CD3243	3793458	3793742	285	-	19445023	126700862	-	core	FIG00515389: hypothetical protein	hypothetical protein		4525.23	13455.8	1.57216	-6.75976	1.38221e-11	7.77709e-11
VBICloDif38397_3396	CD3244	3793823	3795703	1881	-	19445025	126700863	-	core	D-proline reductase, 45 kDa subunit (EC 1.21.4.1) / D-proline reductase, 23 kDa subunit (EC 1.21.4.1)	D-proline reductase proprotein prdA	prdA	2633.12	10576.3	2.00599	-7.62887	2.37588e-14	1.65012e-13
VBICloDif38397_3402	CD3249	3804309	3804512	204	+	19445037	400927521	-	core	Small acid-soluble spore protein, alpha-type SASP	"Small, acid-soluble spore protein beta"	sspB	18.3983	209.333	3.50815	-3.43545	0.000591581	0.00144086
VBICloDif38397_3405	CD3252	3806257	3806502	246	+	19445043	126700871	-	core	no significant homology.	hypothetical protein		2170.11	759.067	-1.51547	6.7025	2.04883e-11	1.14374e-10
VBICloDif38397_3418	CD3265	3822535	3823215	681	-	19445069	126700884	COG0745TK	core	two-component response regulator	two-component response regulator		5.95372	23.2906	1.96788	-4.96727	6.79009e-07	2.4714e-06
VBICloDif38397_3419	CD3266	3823265	3825280	2016	-	19445071	126700885	COG0642T	core	FIG00517034: hypothetical protein	two-component sensor histidine kinase		10.6148	33.475	1.657	-6.11272	9.79496e-10	4.75182e-09
VBICloDif38397_3427	CD3274	3831876	3833822	1947	+	19445087	126700893	COG0370P	core	Ferrous iron transport protein B	ferrous iron transport protein B	feoB3	97.6289	478.088	2.2919	-9.95848	0	0
VBICloDif38397_3428	CD3275	3834001	3835056	1056	-	19445089	126700894	COG0449M	core	putative glucosamine-fructose-6-phosphate aminotransferase	phosphosugar isomerase		4.70332	22.9777	2.28848	-6.35924	2.02752e-10	1.04642e-09
VBICloDif38397_3429	CD3276	3835104	3835904	801	-	19445091	126700895	COG3716G	core	PTS system, mannose-specific IID component (EC 2.7.1.69)	PTS system mannose/fructose/sorbose transporter subunit IID		1.95266	24.3772	3.64202	-6.57368	4.90854e-11	2.64868e-10
VBICloDif38397_3430	CD3277	3835897	3836688	792	-	19445093	126700896	COG3715G	core	PTS system, mannose-specific IIC component (EC 2.7.1.69)	PTS system mannose/fructose/sorbose transporter subunit IIC		1.65039	7.9834	2.27419	-3.70656	0.00021009	0.000540971
VBICloDif38397_3438	CD3285	3847121	3848470	1350	-	19445109	126700904	COG0166G	core	Glucose-6-phosphate isomerase (EC 5.3.1.9)	glucose-6-phosphate isomerase	pgi	1699.63	262.279	-2.69604	13.2586	0	0
VBICloDif38397_3439	CD3286	3848735	3850363	1629	-	19445111	126700905	COG1283P	core	Sodium-dependent phosphate transporter	sodium:phosphate symporter		868.46	189.029	-2.19985	10.9605	0	0
VBICloDif38397_3441	CD3288	3852139	3852456	318	-	19445115	126700907	-	core	FIG00514650: hypothetical protein	hypothetical protein		27.2819	84.3696	1.62878	-4.06207	4.86387e-05	0.000140389
VBICloDif38397_3462	CD3308	3871765	3873114	1350	-	19445157	126700927	COG0689J	core	Ribonuclease PH (EC 2.7.7.56) / Nucleoside 5-triphosphatase RdgB (dHAPTP, dITP, XTP-specific) (EC 3.6.1.15)	"bifunctional enzyme, tRNA nucleotidyltransferase ; Nucleoside-triphosphatase"	rph	568.73	155.994	-1.86626	9.44452	0	0
VBICloDif38397_3467	CD3313	3878495	3879010	516	-	19445167	126700932	COG1142C	core	Fe-S-cluster-containing hydrogenase components 2	"oxidoreductase, Fe-S subunit"	hydN1	291.2	829.798	1.51075	-7.01937	2.22866e-12	1.35011e-11
VBICloDif38397_3468	CD3314	3879010	3880386	1377	-	19445169	126700933	COG4624R	core	Periplasmic [Fe] hydrogenase large subunit (EC 1.12.7.2)	Iron hydrogenase	hydA	76.0407	302.794	1.99349	-9.08344	0	0
VBICloDif38397_3469	CD3315	3880411	3880962	552	-	19445171	126700934	COG1142C	core	Fe-S-cluster-containing hydrogenase components 2	"oxidoreductase, Fe-S subunit"	hydN2	33.0904	118.255	1.83742	-6.20103	5.60941e-10	2.80155e-09
VBICloDif38397_3471	CD3316	3881204	3882037	834	-	19445175	126700936	COG1526C	core	Formate dehydrogenase chain D (EC 1.2.1.2)	formate dehydrogenase formation protein	fdhD	36.2492	267.996	2.88619	-10.9279	0	0
VBICloDif38397_3472	CD3317	3882086	3884230	2145	-	19445177	400927528	-	core	Formate dehydrogenase H (EC 1.2.1.2) @ selenocysteine-containing	formate dehydrogenase-H	fdhF	92.8198	403.724	2.12086	-9.27298	0	0
VBICloDif38397_3475	CD3321	3886720	3887349	630	+	19445183	400927529	-	core	FIG00526074: hypothetical protein	hypothetical protein		10.4566	71.0838	2.7651	-7.78616	6.88338e-15	4.97506e-14
VBICloDif38397_3476	CD3322	3887417	3888250	834	+	19445185	126700941	-	core	FIG00515757: hypothetical protein	hypothetical protein		44.2224	158.07	1.83771	-7.30131	2.84883e-13	1.8588e-12
VBICloDif38397_3481	CD3327	3892146	3892340	195	-	19445195	126700946	-	unique	FIG00513918: hypothetical protein	conjugative transposon protein		116.025	338.245	1.54364	-2.57649	0.00998103	0.0195659
VBICloDif38397_3513	CD3356	3920063	3920386	324	+	19445259	126700976	COG1733K	core	Transcriptional regulator, HxlR family	HxlR family transcriptional regulator		489.594	143.547	-1.77007	7.02683	2.11275e-12	1.28427e-11
VBICloDif38397_3556	CD3393	3967487	3968851	1365	-	19445345	126701016	COG2265J	core	23S rRNA (Uracil-5-) -methyltransferase RumA (EC 2.1.1.-)	23S rRNA (uracil-5-)-methyltransferase RumA (23S rRNA(M-5-U1939)-methyltransferase)		100.926	32.8518	-1.61926	7.09098	1.3316e-12	8.24943e-12
VBICloDif38397_3557	CD3394	3969026	3970786	1761	-	19445347	126701017	COG0469G	core	Pyruvate kinase (EC 2.7.1.40)	pyruvate kinase	pykF	2810.93	121.795	-4.52852	22.5785	0	0
VBICloDif38397_3558	CD3395	3970838	3971797	960	-	19445349	126701018	COG0205G	core	6-phosphofructokinase (EC 2.7.1.11)	6-phosphofructokinase	pfkA	1480.52	49.4619	-4.90364	22.6443	0	0
VBICloDif38397_3569	CD3406	3984501	3986387	1887	+	19445371	126701029	COG1894C	core	NAD-reducing hydrogenase subunit HoxF (EC 1.12.1.2)	"iron-only hydrogenase,electron-transferring subunit HymB-like"	hymB	75.1817	344.858	2.19755	-9.75517	0	0
VBICloDif38397_3570	CD3407	3986410	3988191	1782	+	19445373	126701030	COG4624R	core	Periplasmic [Fe] hydrogenase large subunit (EC 1.12.7.2)	"iron-only hydrogenase, catalytic subunit HymC-like"	hymC	171.284	630.724	1.88061	-8.17473	2.22045e-16	1.72777e-15
VBICloDif38397_3598	CD3435	4025747	4027261	1515	-	19445435	126701058	COG1492H	core	Cobyric acid synthase	cobyric acid synthase	cbiP	165.683	56.4358	-1.55374	7.29195	3.05533e-13	1.98262e-12
VBICloDif38397_3601	CD3438	4029039	4029599	561	-	19445441	126701061	COG2087H	core	Adenosylcobinamide-phosphate guanylyltransferase (EC 2.7.7.62)	bifunctional adenosylcobalamin biosynthesis adenosylcobinamide kinase/adenosylcobinamide-phosphate guanylyltransferase	cobU	65.2066	255.356	1.96942	-7.55088	4.32987e-14	2.9724e-13
VBICloDif38397_3620	CD3455	4048718	4049866	1149	-	19445479	126701078	COG0793M	core	Tail-specific protease (EC 3.4.21.-)	carboxy-terminal protease		267.504	77.548	-1.7864	8.39476	0	0
VBICloDif38397_3621	CD3456	4050029	4050598	570	+	19445481	126701079	COG0212H	core	5-formyltetrahydrofolate cyclo-ligase (EC 6.3.3.2)	5-formyltetrahydrofolate cyclo-ligase		15.6855	81.9121	2.38465	-7.13563	9.63452e-13	6.02392e-12
VBICloDif38397_3623	CD3458	4051422	4052516	1095	-	19445485	126701081	COG3949S	core	FIG00520462: hypothetical protein	membrane protein		136.888	2294.51	4.06711	-16.038	0	0
VBICloDif38397_3626	CD3461	4054871	4055233	363	-	19445491	126701084	COG2337T	core	Programmed cell death toxin YdcE	endoribonuclease toxin		193.703	921.702	2.25045	-9.35768	0	0
VBICloDif38397_3628	CD3463	4055543	4056700	1158	-	19445495	126701086	COG0787M	core	Alanine racemase (EC 5.1.1.1)	alanine racemase	alr	368.263	1198.74	1.70271	-7.29314	3.02869e-13	1.96892e-12
VBICloDif38397_3629	CD3464	4056715	4057305	591	-	19445497	126701087	COG2834M	core	Membrane associated protein	hypothetical protein		73.5277	375.847	2.35378	-9.5092	0	0
VBICloDif38397_3630	CD3465	4057326	4057787	462	-	19445499	126701088	COG3448T	core	Inosine-5'-monophosphate dehydrogenase (EC 1.1.1.205)	hypothetical protein		140.109	484.937	1.79125	-7.43752	1.02585e-13	6.89586e-13
VBICloDif38397_3631	CD3466	4057802	4058182	381	-	19445501	126701089	COG0736I	core	Holo-[acyl-carrier protein] synthase (EC 2.7.8.7)	4'-phosphopantetheinyl transferase	acpS	48.152	159.655	1.72929	-5.52734	3.25132e-08	1.34282e-07
VBICloDif38397_3632	CD3467	4058644	4058904	261	-	19445503	126701090	COG0355C	core	ATP synthase epsilon chain (EC 3.6.3.14)	ATP hydrolase subunit epsilon	atpC	4932.78	425.854	-3.53397	15.7624	0	0
VBICloDif38397_3633	CD3468	4058907	4060301	1395	-	19445505	126701091	COG0055C	core	ATP synthase beta chain (EC 3.6.3.14)	F0F1 ATP synthase subunit beta	atpD	3693.87	485.746	-2.92686	13.5328	0	0
VBICloDif38397_3634	CD3469	4060314	4061192	879	-	19445507	126701092	COG0224C	core	ATP synthase gamma chain (EC 3.6.3.14)	F1 ATP synthase subunit gamma	atpG	2296.82	224.681	-3.35369	16.8189	0	0
VBICloDif38397_3635	CD3470	4061220	4062722	1503	-	19445509	126701093	COG0056C	core	ATP synthase alpha chain (EC 3.6.3.14)	ATP synthase subunit alpha (ATPase subunit alpha) (ATP synthase F1 sector subunit alpha)	atpA	1743.08	179.786	-3.27729	16.406	0	0
VBICloDif38397_3636	CD3471	4062739	4063284	546	-	19445511	126701094	COG0712C	core	ATP synthase delta chain (EC 3.6.3.14)	ATP synthase subunit delta (ATP synthase F1 sector subunit delta)	atpH	317.539	65.12	-2.28576	9.53631	0	0
VBICloDif38397_3637	CD3472	4063281	4063778	498	-	19445513	400927552	-	core	ATP synthase B chain (EC 3.6.3.14)	ATP synthase subunit b (ATP synthase F0 sector subunit b)	atpF	3470.3	356.087	-3.28476	16.1561	0	0
VBICloDif38397_3638	CD3473	4063901	4064161	261	-	19445515	126701096	COG0636C	core	ATP synthase C chain (EC 3.6.3.14)	F0F1 ATP synthase subunit C	atpE	102.141	18.3694	-2.47518	4.49989	6.799e-06	2.20797e-05
VBICloDif38397_3639	CD3474	4064230	4064934	705	-	19445517	126701097	COG0356C	core	ATP synthase A chain (EC 3.6.3.14)	F0 ATP synthase subunit A	atpB	977.497	191.448	-2.35214	11.4276	0	0
VBICloDif38397_3640	CD3475	4064937	4065323	387	-	19445519	126701098	-	core	FIG048548: ATP synthase protein I2	ATP synthase protein I (ATP synthase F0 sector subunit I)	atpI	3302.49	843.078	-1.96982	9.95014	0	0
VBICloDif38397_3642	CD3477	4065740	4066177	438	-	19445523	126701100	COG2131F	core	dCMP deaminase (EC 3.5.4.12); Late competence protein ComEB	dCMP deaminase		1683.9	417.562	-2.01174	9.79337	0	0
VBICloDif38397_3645	CD3479	4067519	4068148	630	-	19445529	126701102	COG0035F	core	phosphoribosyltransferase	uracil phosphoribosyltransferase	upp	1124.68	302.246	-1.89572	9.39786	0	0
VBICloDif38397_3646	CD3480	4068184	4068636	453	-	19445531	126701103	COG0698G	core	Ribose 5-phosphate isomerase B (EC 5.3.1.6)	ribose-5-phosphate isomerase 2	rpiB2	413.301	99.6442	-2.05233	8.4624	0	0
VBICloDif38397_3648	CD3482	4069119	4070159	1041	-	19445535	400927553	-	core	COG0009 Sua5 subfamily, required for N6-threonylcarbamoyl adenosine t(6)A37 modification in tRNA	RNA-binding protein		193.789	49.997	-1.95458	8.76144	0	0
VBICloDif38397_3650	CD3484	4070997	4072061	1065	-	19445539	126701107	COG0216J	core	Peptide chain release factor 1	peptide chain release factor 1	prfA	635.187	170.914	-1.89391	9.48472	0	0
VBICloDif38397_3653	CD3486A	4074009	4074209	201	-	19445545	126701110	COG0254J	core	LSU ribosomal protein L31p	50S ribosomal protein L31	rpmE	13538.9	4517.64	-1.58347	7.3046	2.78e-13	1.81722e-12
VBICloDif38397_3659	CD3491	4082250	4083170	921	-	19445557	126701115	COG0248FP	core	Exopolyphosphatase (EC 3.6.1.11)	exopolyphosphatase		62.5972	18.7932	-1.73589	6.43171	1.2618e-10	6.61796e-10
VBICloDif38397_3664	CD3496	4084737	4085015	279	-	19445567	126701120	COG0776L	core	DNA-binding protein HBsu	Non-specific DNA-binding protein HBsu; signal recognition particle-like (SRP) component	hupA	21488.5	6582.94	-1.70676	8.02743	8.88178e-16	6.76309e-15
VBICloDif38397_3665	CD3497	4085104	4086552	1449	-	19445569	126701121	COG3956R	core	possible tetrapyrrole methyltransferase domain / Nucleoside triphosphate pyrophosphohydrolase MazG (EC 3.6.1.8)	bifunctional tetrapyrrole methylase/NTP pyrophosphohydrolase MazG		1833.79	345.005	-2.41014	11.5968	0	0
VBICloDif38397_3666	CD3498	4086659	4088272	1614	-	19445571	126701122	COG2244R	core	FIG006789: Stage V sporulation protein	stage V sporulation protein B	spoIIIF	524.758	100.419	-2.38562	11.9542	0	0
VBICloDif38397_3669	CD3501	4090081	4093467	3387	-	19445577	126701125	COG1197LK	core	Transcription-repair coupling factor	transcription-repair coupling factor (TRCF ATP-dependent helicase mfd)	mfd	100.004	17.4276	-2.52062	11.7445	0	0
VBICloDif38397_3670	CD3502	4093484	4094044	561	-	19445579	126701126	COG0193J	core	Peptidyl-tRNA hydrolase (EC 3.1.1.29)	peptidyl-tRNA hydrolase	pth	106.994	20.3361	-2.39542	8.09747	6.66134e-16	5.09413e-15
VBICloDif38397_3675	CD3507	4098310	4098837	528	-	19445589	126701131	COG2165NU	core	putative type IV pilin	type IV pilin		11.4578	38.8795	1.76268	-4.46255	8.09905e-06	2.60872e-05
VBICloDif38397_3681	CD3513	4105120	4105635	516	-	19445601	126701137	-	core	pilin	pilin protein		226.084	696.505	1.62328	-7.44269	9.85878e-14	6.63974e-13
VBICloDif38397_3684	CD3516	4109360	4109638	279	-	19445607	126701140	COG2088M	core	Protein of unknown function identified by role in sporulation (SpoVG)	Regulator required for spore cortex synthesis	spoVG	830.735	7992.68	3.26622	-13.8816	0	0
VBICloDif38397_3685	CD3517	4109794	4110672	879	-	19445609	126701141	COG0503F	core	PurR: transcription regulator associated with purine metabolism	pur operon repressor	purR	296.426	103.974	-1.51145	7.04776	1.8181e-12	1.11468e-11
VBICloDif38397_3688	CD3520	4113165	4114061	897	-	19445615	400927557	-	core	Cobalt-zinc-cadmium resistance protein	cation efflux protein		45.9831	15.8894	-1.53304	5.38555	7.22251e-08	2.88252e-07
VBICloDif38397_3691	CD3523	4116850	4117719	870	-	19445621	126701147	COG0030J	core	SSU rRNA (adenine(1518)-N(6)/adenine(1519)-N(6))-dimethyltransferase (EC 2.1.1.182)	KsgA/Dim1 family 16S ribosomal RNA methyltransferase	ksgA	548.742	153.93	-1.83385	8.92408	0	0
VBICloDif38397_3692	CD3524	4117890	4118420	531	-	19445623	126701148	COG1658L	core	Ribonuclease M5 (EC 3.1.26.8)	DNA-binding protein		149.354	31.8796	-2.22803	8.13042	4.44089e-16	3.433e-15
VBICloDif38397_3693	CD3525	4118612	4119679	1068	-	19445625	126701149	COG1840P	core	Ferric iron ABC transporter, iron-binding protein	ABC transporter iron-family extracellular solute-binding protein		830.624	127.951	-2.69861	13.3074	0	0
VBICloDif38397_3694	CD3526	4119691	4121379	1689	-	19445627	126701150	COG1178P	unique	Ferric iron ABC transporter, permease protein	ABC transporter iron-family permease		310.729	68.8708	-2.17369	10.5738	0	0
VBICloDif38397_3695	CD3527	4121397	4122392	996	-	19445629	126701151	COG3842E	core	Ferric iron ABC transporter, ATP-binding protein	ABC transporter iron-family ATP-binding protein		630.676	100.986	-2.64275	12.7412	0	0
VBICloDif38397_3725	CD3555	4155927	4156697	771	-	19445695	126701181	COG1521K	core	Pantothenate kinase type III, CoaX-like (EC 2.7.1.33)	pantothenate kinase		1631.91	479.211	-1.76783	8.86815	0	0
VBICloDif38397_3726	CD3556	4156716	4157306	591	-	19445697	126701182	COG4684S	core	Substrate-specific component PanT of predicted pantothenate ECF transporter	membrane protein		1121.01	353.311	-1.66579	8.27882	2.22045e-16	1.72777e-15
VBICloDif38397_3727	CD3557	4157490	4158458	969	-	19445699	126701183	COG3191EQ	core	endo-type 6-aminohexanoate oligomer hydrolase	peptidase		55.5448	14.0497	-1.98311	7.12554	1.03673e-12	6.45639e-12
VBICloDif38397_3731	CD3561	4163318	4163731	414	-	19445707	400927558	-	core	hypothetical fig|282458.1.peg.583 homolog	hypothetical protein		889.059	161.293	-2.4626	11.0273	0	0
VBICloDif38397_3732	CD3562	4163763	4164569	807	-	19445709	126701188	COG0796M	core	Glutamate racemase (EC 5.1.1.3)	glutamate racemase	murI	305.239	59.9907	-2.34713	10.4667	0	0
VBICloDif38397_3742	CD3571	4172003	4172500	498	-	19445729	126701198	-	core	Protein export cytoplasm protein SecA ATPase RNA helicase (TC 3.A.5.1.1)	hypothetical protein		1999	606.073	-1.72171	8.71235	0	0
VBICloDif38397_3748	CD3577	4177117	4178271	1155	-	19445741	126701204	COG0626E	core	Methionine gamma-lyase (EC 4.4.1.11)	methionine gamma-lyase	mdeA	32.7263	11.0428	-1.56735	5.45047	5.02373e-08	2.03467e-07
VBICloDif38397_3751	CD3581	4180960	4181832	873	+	19445747	126701208	COG1092R	core	SAM dependent methyltransferase	hypothetical protein		149.151	51.5153	-1.5337	6.55828	5.44316e-11	2.93271e-10
VBICloDif38397_3755	CD3585	4186077	4186763	687	-	19445755	126701212	COG1136V	core	ABC transporter, ATPase component	ABC transporter ATP-binding protein		195.292	57.743	-1.75791	7.44972	9.34808e-14	6.30774e-13
VBICloDif38397_3759	CD3588	4189008	4192214	3207	-	19445763	126701215	COG0458EF	core	Carbamoyl-phosphate synthase large chain (EC 6.3.5.5)	carbamoyl phosphate synthase large subunit	carB	215.101	58.1118	-1.88811	9.50484	0	0
VBICloDif38397_3773	CD3601	4208543	4209259	717	-	19445791	126701228	COG1876M	core	D-alanyl-D-alanine carboxypeptidase (EC 3.4.16.4)	"D-alanyl-D-alanine carboxypeptidase, M15 family (DD-peptidase) (DD-carboxypeptidase)"		94.2188	22.2185	-2.08425	7.58771	3.26406e-14	2.24506e-13
VBICloDif38397_3774	CD3602	4209384	4210118	735	+	19445793	126701229	COG0037D	core	tRNA(Cytosine32)-2-thiocytidine synthetase	ATPase		156.791	15.86	-3.30538	12.068	0	0
VBICloDif38397_3778	CD3605A	4213120	4213308	189	-	19445801	126701233	COG1141C	core	Ferredoxin	ferredoxin		609.743	1834.48	1.5891	-4.03238	5.52137e-05	0.000158084
VBICloDif38397_3786	CD3613	4219388	4219840	453	+	19445817	126701239	-	core	FIG00515394: hypothetical protein	hypothetical protein		4.13655	16.2352	1.97262	-3.29437	0.000986408	0.00231377
VBICloDif38397_3789	CD3616	4221925	4223343	1419	-	19445823	126701242	COG3263P	core	Na(+)/H(+) antiporter	potassium/proton antiporter		77.6905	236.138	1.60382	-7.35953	1.84519e-13	1.21961e-12
VBICloDif38397_3794	CD3621	4226672	4227538	867	-	19445833	126701247	COG1357S	core	FIG00521442: hypothetical protein	hypothetical protein		433.978	143.562	-1.59595	7.63162	2.30926e-14	1.61015e-13
VBICloDif38397_3795	CD3622	4228108	4228452	345	-	19445835	126701248	COG2824P	core	Alkylphosphonate utilization operon protein PhnA	hypothetical protein	phnA	1614.21	436.984	-1.88517	8.87107	0	0
VBICloDif38397_3817	CD3642	4251168	4252277	1110	-	19445879	126701269	COG1921E	core	L-seryl-tRNA(Sec) selenium transferase-related protein	selenocysteine synthase		35.059	11.3371	-1.62873	5.64769	1.62613e-08	7.00065e-08
VBICloDif38397_3830	CD3655	4266203	4267492	1290	-	19445913	126701282	COG0104F	core	Adenylosuccinate synthetase (EC 6.3.4.4)	adenylosuccinate synthetase	purA	896.961	232.256	-1.94933	9.81227	0	0
VBICloDif38397_3837	CD3661A	4273316	4273543	228	-	19445927	126701289	COG0238J	core	SSU ribosomal protein S18p @ SSU ribosomal protein S18p, zinc-dependent	30S ribosomal protein S18	rpsR	30340.1	3273.87	-3.21216	15.8601	0	0
VBICloDif38397_3838	CD3662	4273562	4273996	435	-	19445929	126701290	COG0629L	core	Single-stranded DNA-binding protein	Single-stranded DNA-binding protein (Helix-destabilizing protein)	ssb	9001.8	946.175	-3.25003	16.2026	0	0
VBICloDif38397_3839	CD3663	4274033	4274311	279	-	19445931	126701291	COG0360J	core	SSU ribosomal protein S6p	30S ribosomal protein S6	rpsF	21309.1	2243.88	-3.24741	16.3159	0	0
VBICloDif38397_3840	CD3664	4274525	4275721	1197	-	19445933	126701292	COG1167KE	core	Aspartate aminotransferase (AspB-4) (EC 2.6.1.1)	aminotransferase		5555.57	59813.8	3.42847	-14.528	0	0
VBICloDif38397_3854	CD3677	4287415	4288044	630	-	19445961	126701304	COG1847R	core	RNA-binding protein Jag	SpoIIIJ-associated RNA/ssDNA-binding protein Jag	jag	3118.09	1012.93	-1.62214	7.78307	7.10543e-15	5.11476e-14
VBICloDif38397_3858	CD3680	4289457	4289594	138	-	19445969	126701308	-	core	LSU ribosomal protein L34p	50S ribosomal protein L34	rpmH	34555	6378.85	-2.43753	2.32104	0.0202849	0.0368779
VBICloDif38397_0174		207328	207636	309	-	19438555			unique	FIG00517776: hypothetical protein			66.4254	228.791	1.78422	-5.56628	2.60228e-08	1.08739e-07
VBICloDif38397_0369		424638	424991	354	+	19438951			unique	SAM dependent methyltransferase			1012.6	306.48	-1.7242	7.81556	5.55112e-15	4.03676e-14
VBICloDif38397_0519		584772	585425	654	+	19439251			core	FIG00528067: hypothetical protein			134.715	47.0771	-1.51681	6.07564	1.23494e-09	5.91042e-09
VBICloDif38397_0595		677086	677427	342	-	19439403			unique	FIG00516217: hypothetical protein			33.7837	6.69479	-2.33522	3.73383	0.000188587	0.00048952
VBICloDif38397_0847		983831	984061	231	-	19439909			shared	FIG00516931: hypothetical protein			24.5955	110.23	2.16405	-3.6979	0.000217389	0.000558553
VBICloDif38397_0896		1033441	1034067	627	+	19440007			core	Oligopeptide transport ATP-binding protein OppF (TC 3.A.1.5.1)			797.517	4664.33	2.54808	-10.3592	0	0
VBICloDif38397_0942		1087383	1088036	654	+	19440099			core	FIG00516323: hypothetical protein			7.30752	28.3886	1.95786	-5.14442	2.68351e-07	1.01733e-06
VBICloDif38397_1305		1444347	1444739	393	-	19440835			core	RNA polymerase sporulation specific sigma factor SigK			0.638045	10.3116	4.01447	-2.64371	0.00820026	0.0164653
VBICloDif38397_1672		1851337	1851525	189	+	19441569			core	Ferredoxin			2104.87	103.861	-4.341	4.54675	5.44797e-06	1.79379e-05
VBICloDif38397_1798		1992553	1992921	369	+	19441823			core	N-methylhydantoinase (ATP-hydrolyzing) (EC 3.5.2.14)			198.669	39.7103	-2.32278	7.70572	1.31006e-14	9.31717e-14
VBICloDif38397_1828		2021795	2022031	237	-	19441883			unique	FIG00522183: hypothetical protein			29.9917	134.189	2.16163	-4.34935	1.36542e-05	4.29305e-05
VBICloDif38397_2731		3014825	3015109	285	+	19443689			core	FIG00514313: hypothetical protein			4.218	28.4759	2.75511	-2.74941	0.00597018	0.0122575
VBICloDif38397_3018		3378823	3379545	723	-	19444269			core	ABC transporter of unknown compound (not Fe3+), ATP-binding protein			28.8462	5.289	-2.44731	6.09411	1.10046e-09	5.30277e-09
VBICloDif38397_3165		3508294	3509037	744	-	19444563			core	FIG00515449: hypothetical protein			5.35154	20.0573	1.9061	-4.68834	2.75427e-06	9.42655e-06

## Sheet: CD196
Differentially expressed genes in strain C. difficile 196 during nutrient shift
PATRIC_Locus	RefSeq_Locus	Start	End	Gene length	Strand	FID	Gene type	PID	COG	Gene name	Gene symbol	Ctrl	BDM	log2(fold_change)	test_stat	p_value	q_value
VBICloDif125228_0009	CD196_0009	9129	9446	318	+	19445988	core	260681778	COG1366T	anti-sigma F factor antagonist (spoIIAA-2); anti sigma b factor antagonist RsbV	rsbV	49.3427	15.6889	-1.65309	3.09128	0.00199297	0.00677764
VBICloDif125228_0022	CD196_0022	34750	38181	3432	+	19446116	core	260681790	COG1038C	Pyruvate carboxyl transferase (EC 6.4.1.1)	pyc	573.203	1650.62	1.52589	-4.16776	3.07604e-05	0.000167505
VBICloDif125228_0023	CD196_0023	38423	40351	1929	+	19446118	core	260681791	COG0480J	Translation elongation factor G-related protein	-	72.511	783.993	3.43457	-11.6312	0	0
VBICloDif125228_0033	CD196_0033	52607	53773	1167	+	19446138	core	260681801	COG2730G	probable beta-1,3-exoglucanase	-	1.32997	4.95262	1.8968	-3.20054	0.00137169	0.00492345
VBICloDif125228_0034	CD196_0034	53795	55441	1647	+	19446140	core	260681802	COG3507G	Beta-xylosidase (EC 3.2.1.37)	-	1.91798	6.30456	1.71681	-3.92516	8.66731e-05	0.00042943
VBICloDif125228_0041	CD196_0041	63694	66642	2949	+	19446154	core	260681809	COG1221KT	NtrC family Transcriptional regulator, ATPase domain	-	1.7478	5.64846	1.69232	-4.44461	8.80501e-06	5.40041e-05
VBICloDif125228_0042	CD196_0042	66620	67084	465	+	19446156	core	260681810	COG1762GT	PTS system, galactitol-specific IIA component (EC 2.7.1.69)	-	2.31248	13.2423	2.51764	-3.18239	0.00146067	0.00516752
VBICloDif125228_0044	CD196_0044	67576	68925	1350	+	19446160	core	260681812	COG3775G	PTS system, galactitol-specific IIC component (EC 2.7.1.69)	-	2.26722	9.15995	2.01441	-4.56222	5.06168e-06	3.23503e-05
VBICloDif125228_0046	CD196_0046	69605	70255	651	+	19446164	core	260681814	COG0235G	Ribulose-5-phosphate 4-epimerase and related epimerases and aldolases	-	2.08598	11.2722	2.43397	-3.65157	0.000260641	0.0011437
VBICloDif125228_0049	CD196_0049	72345	72830	486	+	19446170	core	260681817	COG0245I	2-C-methyl-D-erythritol 2,4-cyclodiphosphate synthase (EC 4.6.1.12)	ispF	354.516	122.432	-1.53387	5.09506	3.48623e-07	2.76997e-06
VBICloDif125228_0050	CD196_0050	73197	74912	1716	+	19446172	core	260681818	COG0442J	Prolyl-tRNA synthetase (EC 6.1.1.15)	proS	861.058	257.398	-1.74211	5.62265	1.88046e-08	1.91108e-07
VBICloDif125228_0065	CD196_0063	87574	88767	1194	+	19446202	core	260681830	COG0050J	Translation elongation factor Tu	-	17170	4714.33	-1.86476	4.15249	3.28879e-05	0.000177159
VBICloDif125228_0067	CD196_0065	89192	89413	222	+	19446206	core	260681832	COG0690U	Preprotein translocase subunit SecE (TC 3.A.5.1.1)	secE	1460.15	273.709	-2.41541	6.92789	4.27169e-12	6.97843e-11
VBICloDif125228_0068	CD196_0066	89433	89975	543	+	19446208	core	260681833	COG0250K	Transcription antitermination protein NusG	nusG	4932.49	1108.71	-2.15343	6.68001	2.38927e-11	3.64754e-10
VBICloDif125228_0069	CD196_0067	90011	90436	426	+	19446210	core	260681834	COG0080J	LSU ribosomal protein L11p (L12e)	rplK	5700.9	1066.94	-2.41771	7.84115	4.44089e-15	9.82618e-14
VBICloDif125228_0070	CD196_0068	90506	91204	699	+	19446212	core	260681835	COG0081J	LSU ribosomal protein L1p (L10Ae)	rplA	4629.38	900.807	-2.36153	6.97935	2.96563e-12	5.03293e-11
VBICloDif125228_0071	CD196_0069	91427	91933	507	+	19446214	core	260681836	COG0244J	LSU ribosomal protein L10p (P0)	rplJ	10335.2	1781.22	-2.53663	7.11985	1.08047e-12	1.93709e-11
VBICloDif125228_0072	CD196_0070	91991	92356	366	+	19446216	core	260681837	COG0222J	LSU ribosomal protein L7/L12 (P1/P2)	rplL	12832.7	2935.33	-2.12823	6.24063	4.35823e-10	5.5405e-09
VBICloDif125228_0076	CD196_0074	101536	101961	426	+	19446224	core	395342380	-	SSU ribosomal protein S12p (S23e)	rpsL	13536.6	4557.95	-1.57041	4.34867	1.36964e-05	7.99377e-05
VBICloDif125228_0077	CD196_0075	102084	102554	471	+	19446226	core	260681842	COG0049J	SSU ribosomal protein S7p (S5e)	rpsG	9823.71	2858.19	-1.78117	5.11895	3.07247e-07	2.47497e-06
VBICloDif125228_0079	CD196_0077	104760	105953	1194	+	19446230	core	260681844	COG0050J	Translation elongation factor Tu	tufB	17605.9	4819.75	-1.86903	4.15566	3.24345e-05	0.000174986
VBICloDif125228_0080	CD196_0078	106326	106637	312	+	19446232	core	260681845	COG0051J	SSU ribosomal protein S10p (S20e)	rpsJ	8781.32	2836.87	-1.63014	5.40719	6.40205e-08	5.98438e-07
VBICloDif125228_0081	CD196_0079	106729	107358	630	+	19446234	core	260681846	COG0087J	LSU ribosomal protein L3p (L3e)	rplC	4984.79	1561.64	-1.67447	4.99394	5.91592e-07	4.45875e-06
VBICloDif125228_0082	CD196_0080	107388	108011	624	+	19446236	core	260681847	COG0088J	LSU ribosomal protein L4p (L1e)	rplD	3276.46	961.8	-1.76833	5.65566	1.55246e-08	1.60574e-07
VBICloDif125228_0083	CD196_0081	108011	108301	291	+	19446238	core	260681848	COG0089J	LSU ribosomal protein L23p (L23Ae)	rplW	10181.7	2360.41	-2.10888	7.12341	1.05294e-12	1.89745e-11
VBICloDif125228_0084	CD196_0082	108331	109161	831	+	19446240	core	260681849	COG0090J	LSU ribosomal protein L2p (L8e)	rplB	4137.78	1330.36	-1.63704	4.69676	2.64327e-06	1.76353e-05
VBICloDif125228_0085	CD196_0083	109196	109477	282	+	19446242	core	260681850	COG0185J	SSU ribosomal protein S19p (S15e)	rpsS	1981.9	689.241	-1.52381	5.36622	8.04058e-08	7.32028e-07
VBICloDif125228_0086	CD196_0084	109509	109844	336	+	19446244	core	260681851	COG0091J	LSU ribosomal protein L22p (L17e)	rplV	21942.2	4349.78	-2.33469	6.43835	1.2078e-10	1.65586e-09
VBICloDif125228_0087	CD196_0085	109867	110682	816	+	19446246	core	260681852	COG0092J	SSU ribosomal protein S3p (S3e)	rpsC	7864.54	1332.78	-2.56092	6.49766	8.15763e-11	1.14534e-09
VBICloDif125228_0088	CD196_0086	110718	111149	432	+	19446248	core	260681853	COG0197J	LSU ribosomal protein L16p (L10e)	rplP	6395.26	1199.07	-2.41508	7.59887	2.9976e-14	6.27522e-13
VBICloDif125228_0089	CD196_0087	111151	111354	204	+	19446250	core	260681854	COG0255J	LSU ribosomal protein L29p (L35e)	rpmC	804.399	205.253	-1.97051	4.68429	2.80936e-06	1.85785e-05
VBICloDif125228_0090	CD196_0088	111378	111632	255	+	19446252	core	260681855	COG0186J	SSU ribosomal protein S17p (S11e)	rpsQ	772.489	208.973	-1.8862	5.59623	2.19061e-08	2.1881e-07
VBICloDif125228_0091	CD196_0089	111658	112026	369	+	19446254	core	260681856	COG0093J	LSU ribosomal protein L14p (L23e)	rplN	9891.55	2350.35	-2.07332	6.38043	1.76593e-10	2.36539e-09
VBICloDif125228_0092	CD196_0090	112047	112355	309	+	19446256	core	260681857	COG0198J	LSU ribosomal protein L24p (L26e)	rplX	11431.7	2328.88	-2.29533	7.19478	6.255e-13	1.15701e-11
VBICloDif125228_0093	CD196_0091	112385	112927	543	+	19446258	core	260681858	COG0094J	LSU ribosomal protein L5p (L11e)	rplE	1809.96	510.708	-1.82539	6.44988	1.11939e-10	1.55293e-09
VBICloDif125228_0095	CD196_0093	113163	113561	399	+	19446262	core	260681860	COG0096J	SSU ribosomal protein S8p (S15Ae)	rpsH	12970.9	2691.01	-2.26906	6.35676	2.06059e-10	2.71843e-09
VBICloDif125228_0096	CD196_0094	113592	114134	543	+	19446264	core	260681861	COG0097J	LSU ribosomal protein L6p (L9e)	rplF	3806.68	1016.48	-1.90495	6.12359	9.14912e-10	1.11837e-08
VBICloDif125228_0097	CD196_0095	114170	114538	369	+	19446266	core	260681862	COG0256J	LSU ribosomal protein L18p (L5e)	rplR	8640.56	1790.59	-2.27069	6.96241	3.34488e-12	5.59507e-11
VBICloDif125228_0098	CD196_0096	114559	115068	510	+	19446268	core	260681863	COG0098J	SSU ribosomal protein S5p (S2e)	rpsE	6885.82	1717.02	-2.00372	5.97647	2.2803e-09	2.66619e-08
VBICloDif125228_0099	CD196_0097	115083	115268	186	+	19446270	core	260681864	COG1841J	LSU ribosomal protein L30p (L7e)	rpmD	1734.36	174.69	-3.31154	4.82915	1.37114e-06	9.70346e-06
VBICloDif125228_0100	CD196_0098	115301	115744	444	+	19446272	core	260681865	COG0200J	LSU ribosomal protein L15p (L27Ae)	rplO	3474.39	1013.23	-1.77779	6.08955	1.13228e-09	1.35563e-08
VBICloDif125228_0101	CD196_0099	115788	117056	1269	+	19446274	core	260681866	COG0201U	Preprotein translocase secY subunit (TC 3.A.5.1.1)	prlA	2279.1	668.007	-1.77053	5.18689	2.1383e-07	1.79269e-06
VBICloDif125228_0102	CD196_0100	117073	117723	651	+	19446276	core	260681867	COG0563F	Adenylate kinase (EC 2.7.4.3)	adk	2892.94	648.433	-2.15751	7.0221	2.18559e-12	3.8014e-11
VBICloDif125228_0103	CD196_0101	117724	118470	747	+	19446278	core	260681868	COG0024J	Methionine aminopeptidase (EC 3.4.11.18)	map1	7786.94	1706.98	-2.18961	5.84529	5.05672e-09	5.77722e-08
VBICloDif125228_0104	CD196_0102	118492	118761	270	+	19446280	core	260681869	-	FIG00513560: hypothetical protein	-	63.2754	20.3622	-1.63575	2.94557	0.00322359	0.0103202
VBICloDif125228_0105	CD196_0103	118799	119017	219	+	19446282	core	260681870	COG0361J	Translation initiation factor 1	infA	803.832	215.17	-1.90142	5.1395	2.75465e-07	2.25006e-06
VBICloDif125228_0107	CD196_0105	119319	119690	372	+	19446286	core	260681872	COG0099J	SSU ribosomal protein S13p (S18e)	rpsM	6044.2	1220.21	-2.30842	7.72835	1.08802e-14	2.33357e-13
VBICloDif125228_0108	CD196_0106	119726	120124	399	+	19446288	core	260681873	COG0100J	SSU ribosomal protein S11p (S14e)	rpsK	22561.1	4526.2	-2.31746	6.01426	1.80709e-09	2.13432e-08
VBICloDif125228_0109	CD196_0107	120156	120779	624	+	19446290	core	260681874	COG0522J	SSU ribosomal protein S4p (S9e)	rpsD	7685.61	1818.64	-2.0793	5.80431	6.46324e-09	7.26543e-08
VBICloDif125228_0110	CD196_0108	120857	121804	948	+	19446292	core	260681875	COG0202K	DNA-directed RNA polymerase alpha subunit (EC 2.7.7.6)	rpoA	6734.12	1554.81	-2.11475	5.50049	3.78744e-08	3.65771e-07
VBICloDif125228_0111	CD196_0109	121825	122166	342	+	19446294	core	260681876	COG0203J	LSU ribosomal protein L17p	rplQ	10997.5	3187.51	-1.78667	5.55754	2.73599e-08	2.70198e-07
VBICloDif125228_0126	CD196_0124	154346	155248	903	+	19446400	core	260681890	COG0280C	phosphotransbutyrylase (EC 2.3.1.19)	ptb	146.339	2333.3	3.99499	-13.4841	0	0
VBICloDif125228_0127	CD196_0125	155270	156349	1080	+	19446402	core	260681891	COG3426C	Butyrate kinase (EC 2.7.2.7)	buk	155.42	2470.73	3.99069	-13.1865	0	0
VBICloDif125228_0128	CD196_0126	156339	157016	678	+	19446404	core	260681892	-	FIG00623394: hypothetical protein	-	180.41	2686.91	3.8966	-13.2762	0	0
VBICloDif125228_0129	CD196_0127	157059	157274	216	+	19446406	core	260681893	COG2221C	2-oxoglutarate oxidoreductase, delta subunit, putative (EC 1.2.7.3)	-	201.521	4565.48	4.50177	-13.8572	0	0
VBICloDif125228_0130	CD196_0128	157303	158382	1080	+	19446408	core	260681894	COG0674C	2-oxoglutarate oxidoreductase, alpha subunit (EC 1.2.7.3)	-	926.18	21306.2	4.52384	-13.4169	0	0
VBICloDif125228_0131	CD196_0129	158382	159134	753	+	19446410	core	260681895	COG1013C	Pyruvate synthase subunit porB (EC 1.2.7.1)	-	1040.79	22175.3	4.41321	-13.2348	0	0
VBICloDif125228_0132	CD196_0130	159135	159692	558	+	19446412	core	260681896	COG1014C	2-oxoglutarate oxidoreductase, gamma subunit (EC 1.2.7.3)	-	748.515	15604.6	4.3818	-13.4392	0	0
VBICloDif125228_0133	CD196_0131	159862	161208	1347	+	19446414	core	260681897	COG1109G	Phosphoglucosamine mutase (EC 5.4.2.10)	-	1668.6	501.602	-1.73402	5.22739	1.71915e-07	1.48034e-06
VBICloDif125228_0134	CD196_0132	161475	163307	1833	+	19446416	core	260681898	COG0449M	Glucosamine--fructose-6-phosphate aminotransferase [isomerizing] (EC 2.6.1.16)	glmS	1428.68	387.392	-1.88282	5.53366	3.13622e-08	3.0541e-07
VBICloDif125228_0138	CD196_0136	167630	168694	1065	+	19446424	core	260681902	COG2385D	Stage II sporulation protein D (SpoIID)	spoIIC	358.601	113.946	-1.65403	6.00163	1.95346e-09	2.29942e-08
VBICloDif125228_0152	CD196_0150	182798	183316	519	+	19446452	core	260681916	-	FIG00627599: hypothetical protein	-	11.6051	3.79415	-1.61291	2.9152	0.00355463	0.0112461
VBICloDif125228_0154	CD196_0152	184419	185471	1053	+	19446456	core	260681918	COG0624E	Acetylornithine deacetylase/Succinyl-diaminopimelate desuccinylase and related deacylases	-	18.1025	5.09644	-1.82863	4.48678	7.2306e-06	4.48991e-05
VBICloDif125228_0157	CD196_0154	186701	187252	552	+	19446462	core	260681920	COG1544J	Ribosomal subunit interface protein	-	1851.5	7060.19	1.93101	-5.93116	3.00795e-09	3.49362e-08
VBICloDif125228_0168	CD196_0165	200148	202856	2709	+	19446484	core	260681931	COG1882C	Pyruvate formate-lyase (EC 2.3.1.54)	hpdB	67.1682	224.606	1.74155	-6.31485	2.7043e-10	3.51459e-09
VBICloDif125228_0169	CD196_0166	202860	203117	258	+	19446486	core	260681932	-	4-hydroxyphenylacetate decarboxylase, regulatory subunit	hpdC	95.1046	276.71	1.54079	-4.27803	1.88552e-05	0.000106491
VBICloDif125228_0170	CD196_0167	203110	204060	951	+	19446488	core	260681933	COG1180O	Pyruvate formate-lyase activating enzyme (EC 1.97.1.4)	hpdA	57.7392	214.672	1.89451	-6.88284	5.86686e-12	9.40851e-11
VBICloDif125228_0185	CD196_0183	223558	225471	1914	-	19446518	core	260681949	COG0488R	ABC transporter ATP-binding protein uup	-	114.082	38.8708	-1.55331	5.46058	4.74593e-08	4.54569e-07
VBICloDif125228_0195	CD196_0193	234905	236170	1266	+	19446538	core	260681959	COG0334E	NAD-specific glutamate dehydrogenase (EC 1.4.1.2)	gluD	833.221	17657.9	4.40547	-13.0007	0	0
VBICloDif125228_0221	CD196_0219	267394	269424	2031	+	19446590	core	260681983	COG3711K	PTS system IIA 2 domain protein	-	0.528775	3.73173	2.81912	-4.23211	2.31511e-05	0.000128674
VBICloDif125228_0222	CD196_0220	269421	269873	453	+	19446592	core	260681984	COG1762GT	PTS system, fructose-specific IIA component (EC 2.7.1.69)	-	2.93405	11.7936	2.00704	-2.70121	0.00690885	0.0199945
VBICloDif125228_0223	CD196_0221	269875	270930	1056	+	19446594	core	260681985	COG1299G	PTS system, fructose-specific IIC component (EC 2.7.1.69)	-	2.42884	10.0095	2.04303	-4.2391	2.24414e-05	0.000125729
VBICloDif125228_0224	CD196_0222	270997	271305	309	+	19446596	core	260681986	COG1445G	PTS system, fructose-specific IIB component (EC 2.7.1.69)	-	3.73374	34.1093	3.19147	-3.26694	0.00108715	0.00403042
VBICloDif125228_0225	CD196_0223	271409	272674	1266	+	19446598	core	260681987	COG4573G	FIG00774563: hypothetical protein	-	5.55661	58.703	3.40116	-10.2041	0	0
VBICloDif125228_0230	CD196_0228	275694	276170	477	+	19446608	core	260681992	COG0041F	Phosphoribosylaminoimidazole carboxylase catalytic subunit (EC 4.1.1.21)	purE	380.235	124.429	-1.61157	5.35425	8.59134e-08	7.80138e-07
VBICloDif125228_0234	CD196_0232	279317	279910	594	+	19446616	core	260681996	COG0299F	Phosphoribosylglycinamide formyltransferase (EC 2.1.2.2)	purN	97.4811	24.9398	-1.96667	5.68403	1.3156e-08	1.38953e-07
VBICloDif125228_0235	CD196_0233	279903	281435	1533	+	19446618	core	260681997	COG0138F	IMP cyclohydrolase (EC 3.5.4.10) / Phosphoribosylaminoimidazolecarboxamide formyltransferase (EC 2.1.2.3)	purH	76.9956	20.1773	-1.93204	6.23482	4.52291e-10	5.70834e-09
VBICloDif125228_0236	CD196_0234	281446	282696	1251	+	19446620	core	260681998	COG0151F	Phosphoribosylamine--glycine ligase (EC 6.3.4.13)	purD	154.257	47.7505	-1.69175	5.85539	4.75886e-09	5.45474e-08
VBICloDif125228_0300	CD196_0296	342082	342477	396	+	19446748	core	260682060	COG5015S	FIG00516345: hypothetical protein	-	27.3992	186.686	2.76841	-7.93811	1.9984e-15	4.65761e-14
VBICloDif125228_0304	CD196_0300	347100	347507	408	+	19446756	core	260682064	COG2893G	PTS system, mannose-specific IIA component (EC 2.7.1.69)	-	3.55464	30.1347	3.08365	-4.27239	1.93386e-05	0.000109045
VBICloDif125228_0306	CD196_0302	348031	348432	402	+	19446760	core	260682066	COG2893G	putative PTS system, IIa component	-	1.31045	12.2753	3.22763	-2.48248	0.0130471	0.0344767
VBICloDif125228_0307	CD196_0303	348450	348938	489	+	19446762	core	260682067	COG3444G	PTS system, mannose-specific IIB component (EC 2.7.1.69)	-	3.52397	19.8158	2.49137	-4.00374	6.23495e-05	0.000316363
VBICloDif125228_0308	CD196_0304	348965	349720	756	+	19446764	core	260682068	COG3715G	PTS system, mannose-specific IIC component (EC 2.7.1.69)	-	4.51749	32.8702	2.86319	-6.65398	2.85281e-11	4.28043e-10
VBICloDif125228_0309	CD196_0305	349720	350583	864	+	19446766	core	260682069	COG3716G	PTS system, mannose-specific IID component (EC 2.7.1.69)	-	1.77743	12.126	2.77024	-4.77357	1.8099e-06	1.25544e-05
VBICloDif125228_0310	CD196_0306	350630	351109	480	+	19446768	core	260682070	-	FIG00518116: hypothetical protein	-	13.6775	82.7335	2.59666	-6.63721	3.19673e-11	4.77597e-10
VBICloDif125228_0322	CD196_0317	362624	364135	1512	+	19446792	core	260682081	COG1129G	Ribose ABC transport system, ATP-binding protein RbsA (TC 3.A.1.2.1)	rbsA	1.16634	4.2002	1.84847	-3.34738	0.000815783	0.0031306
VBICloDif125228_0344	CD196_0337	390194	391117	924	-	19446842	core	260682101	COG0642T	two-component sensor histidine kinase	-	100.097	35.2371	-1.50624	4.81046	1.50584e-06	1.06137e-05
VBICloDif125228_0350	CD196_0343	395497	396210	714	+	19446854	core	260682106	COG0310P	Substrate-specific component CbiM of cobalt ECF transporter	cbiM	1323.02	82.036	-4.01144	12.9554	0	0
VBICloDif125228_0351	CD196_0344	396200	396484	285	+	19446856	core	260682107	COG1930P	Additional substrate-specific component CbiN of cobalt ECF transporter	cbiN	741.152	60.0439	-3.62568	9.90588	0	0
VBICloDif125228_0352	CD196_0345	396487	397185	699	+	19446858	core	260682108	COG0619P	Transmembrane component CbiQ of energizing module of cobalt ECF transporter	cbiQ	527.66	11.9991	-5.45862	15.0335	0	0
VBICloDif125228_0353	CD196_0346	397178	397996	819	+	19446860	core	260682109	COG1122P	ATPase component CbiO of energizing module of cobalt ECF transporter	cbiO	740.635	31.4757	-4.55645	14.0269	0	0
VBICloDif125228_0366	CD196_0357	414537	415472	936	+	19446886	core	260682119	COG3290T	FIG00515250: hypothetical protein	-	22.5547	6.6495	-1.76211	4.4929	7.026e-06	4.38623e-05
VBICloDif125228_0370	CD196_0361	422122	422373	252	-	19446894	core	260682123	-	FIG00517465: hypothetical protein	-	284.307	47.3727	-2.58532	6.15447	7.53301e-10	9.3058e-09
VBICloDif125228_0388	CD196_0377	438649	439245	597	-	19446930	core	260682139	COG0535R	Radical SAM-superfamily protein	-	133.097	440.878	1.72791	-6.29189	3.13627e-10	4.04591e-09
VBICloDif125228_0389	CD196_0378	439272	439799	528	-	19446932	core	260682140	-	Substrate-specific component PdxU2 of predicted pyridoxin-related ECF transporter	-	19.8412	96.2651	2.27852	-6.58385	4.58431e-11	6.65742e-10
VBICloDif125228_0391	CD196_0380	441836	443035	1200	+	19446936	core	260682142	COG1804C	Hydroxyproline dehydratase putative	hadA	4958.28	14248.4	1.52289	-3.71998	0.000199242	0.000908148
VBICloDif125228_0392	CD196_0381	443074	443874	801	+	19446938	core	260682143	COG1924I	Benzoyl-CoA reductase subunit BadG (EC 1.3.99.15)	hadI	1578.74	5679.08	1.84688	-5.51248	3.53816e-08	3.43595e-07
VBICloDif125228_0393	CD196_0382	443889	445115	1227	+	19446940	core	260682144	COG1775E	Benzoyl-CoA reductase subunit BadE (EC 1.3.99.15)	hadB	1805.24	6216.41	1.78389	-4.91871	8.7115e-07	6.35812e-06
VBICloDif125228_0394	CD196_0383	445115	446242	1128	+	19446942	core	260682145	COG1775E	Benzoyl-CoA reductase subunit BadD (EC 1.3.99.15)	hadC	2199.97	7903.63	1.84503	-5.02458	5.04529e-07	3.89318e-06
VBICloDif125228_0395	CD196_0384	446290	447423	1134	+	19446944	core	260682146	COG1960I	Butyryl-CoA dehydrogenase (EC 1.3.99.2)	acdB	3662.52	14417.3	1.97689	-5.06131	4.16375e-07	3.27112e-06
VBICloDif125228_0396	CD196_0385	447456	448241	786	+	19446946	core	260682147	COG2086C	Electron transfer flavoprotein, beta subunit	etfB1	7419.28	27227.8	1.87573	-4.69481	2.66859e-06	1.77703e-05
VBICloDif125228_0397	CD196_0386	448260	449297	1038	+	19446948	core	260682148	COG2025C	Electron transfer flavoprotein, alpha subunit	etfA1	6549.66	27197	2.05395	-5.04131	4.62359e-07	3.59202e-06
VBICloDif125228_0408	CD196_0395	459143	460303	1161	+	19446970	core	260682156	COG2247M	FIG00514915: hypothetical protein	-	324.623	1514.93	2.22241	-7.48061	7.39409e-14	1.48562e-12
VBICloDif125228_0415	CD196_0402	468101	468475	375	+	19446984	core	260682163	-	D-Ornithine 4,5-aminomutase S subunit (EC 5.4.3.5)	oraS	4.90337	16.4871	1.74949	-2.5466	0.0108777	0.0295482
VBICloDif125228_0417	CD196_0404	470673	472082	1410	+	19446988	core	260682165	-	Probable reactivating factor for D-ornithine aminomutase	-	0.809229	3.98981	2.3017	-3.50225	0.000461344	0.00190196
VBICloDif125228_0439	CD196_0424	496680	498344	1665	+	19447032	core	260682185	COG0366G	Family 13 glycosyl hydrolase, row 724	malL	1.95528	5.71409	1.54715	-3.53611	0.000406064	0.00169809
VBICloDif125228_0440	CD196_0425	498349	500223	1875	+	19447034	core	260682186	COG1263G	PTS system, sucrose-specific IIB component (EC 2.7.1.69) / PTS system, sucrose-specific IIC component (EC 2.7.1.69) / PTS system, sucrose-specific IIA component (EC 2.7.1.69)	-	9.01202	28.1449	1.64295	-5.14081	2.73559e-07	2.23973e-06
VBICloDif125228_0452	CD196_0437	509628	510320	693	+	19447058	core	260682198	COG0745TK	Two-component response regulator	spaR	147.959	49.1844	-1.58893	5.02312	5.08398e-07	3.90629e-06
VBICloDif125228_0459	CD196_0444	518815	519642	828	-	19447072	core	260682205	COG0388R	FIG003879: Predicted amidohydrolase / Omega amidase (Nit2 homolog)	-	57.6202	293.444	2.34844	-8.40173	0	0
VBICloDif125228_0474	CD196_0459	538403	539581	1179	+	19447102	core	260682220	-	FIG00519258: hypothetical protein	-	1271.38	3624.41	1.51135	-4.36322	1.28164e-05	7.53043e-05
VBICloDif125228_0483	CD196_0467	552400	553710	1311	-	19447120	core	260682228	COG1473R	putative amidohydrolase	-	364.686	95.1806	-1.93792	6.96298	3.33134e-12	5.59507e-11
VBICloDif125228_0506	CD196_0490	575242	575898	657	+	19447166	core	260682250	-	conserved hypothetical protein	-	5.99153	59.4455	3.31057	-7.98463	1.33227e-15	3.21214e-14
VBICloDif125228_0515	CD196_0499	584358	585287	930	+	19447184	core	260682258	COG2066E	Glutaminase (EC 3.5.1.2)	glsA	81.6754	231.519	1.50316	-5.56731	2.58707e-08	2.56215e-07
VBICloDif125228_0519	CD196_0503	588776	589180	405	-	19447192	core	260682262	COG4570L	Possible Zn-finger containing protein	-	327.741	90.9336	-1.84967	5.71009	1.12916e-08	1.21091e-07
VBICloDif125228_0545	CD196_0524	616058	617518	1461	+	19447244	core	260682281	COG1012C	Non-phosphorylating glyceraldehyde-3-phosphate dehydrogenase (NADP) (EC 1.2.1.9)	gapN	1007.76	230.579	-2.12781	6.54984	5.75984e-11	8.25262e-10
VBICloDif125228_0550	CD196_0528	622333	622608	276	+	19447254	core	260682285	-	FIG00513568: hypothetical protein	-	606.895	9216.68	3.92473	-13.5605	0	0
VBICloDif125228_0552		623388	623822	435	+	19447258	shared			FIG00515128: hypothetical protein		9.06624	72.7302	3.00398	-6.58901	4.42764e-11	6.47658e-10
VBICloDif125228_0558	CD196_0534	635359	635754	396	-	19447270	core	260682290	-	FIG00514581: hypothetical protein	-	4.83765	16.7917	1.79537	-2.60039	0.00931169	0.0258568
VBICloDif125228_0575	CD196_0547	650177	651190	1014	+	19447304	shared	260682303	COG4219KT	FIG00514572: hypothetical protein	-	6.05411	1.60075	-1.91917	3.6388	0.00027391	0.001194
VBICloDif125228_0584	CD196_0556	660689	661513	825	-	19447322	core	260682311	COG0789K	Transcriptional regulator, MerR family	-	247.247	71.1406	-1.79721	6.12085	9.30797e-10	1.13045e-08
VBICloDif125228_0621	CD196_0591	698083	699273	1191	+	19447396	core	260682345	-	FIG00513927: hypothetical protein	-	35.609	12.3059	-1.53289	4.47357	7.69237e-06	4.75974e-05
VBICloDif125228_0657	CD196_0624	750100	751497	1398	+	19447469	core	260682377	COG5485R	FIG00512804: hypothetical protein	-	1.787	5.57033	1.64022	-3.4121	0.000644644	0.00253222
VBICloDif125228_0687	CD196_0653	791089	793467	2379	+	19447529	core	260682406	COG1193L	Recombination inhibitory protein MutS2	-	268.522	78.0468	-1.78263	6.39244	1.63263e-10	2.19526e-09
VBICloDif125228_0688		793535	793948	414	+	19447531	core			FIG00517001: hypothetical protein		287.979	86.1472	-1.74109	5.37148	7.80932e-08	7.1283e-07
VBICloDif125228_0694	CD196_0660	800818	801729	912	+	19447543	core	260682412	COG0280C	Phosphate butyryltransferase (EC 2.3.1.19)	-	100.297	608.261	2.60041	-9.39338	0	0
VBICloDif125228_0695	CD196_0661	802336	804255	1920	+	19447545	core	260682413	COG1151C	Similar to carbon monoxide dehydrogenase CooS subunit	cooS	254.582	2127.72	3.0631	-9.53046	0	0
VBICloDif125228_0697	CD196_0662	804565	805344	780	+	19447549	core	260682414	COG3640D	CO dehydrogenase accessory protein CooC (nickel insertion)	cooC	165.342	1789.5	3.43603	-11.8004	0	0
VBICloDif125228_0698	CD196_0663	805593	807269	1677	+	19447551	core	260682415	COG2759F	Formate--tetrahydrofolate ligase (EC 6.3.4.3)	fhs	199.553	1814.29	3.18457	-10.3384	0	0
VBICloDif125228_0699	CD196_0664	807374	808006	633	+	19447553	core	260682416	COG3404E	Formiminotetrahydrofolate cyclodeaminase (EC 4.3.1.4)	fchA	142.567	652.234	2.19375	-7.92616	2.22045e-15	5.14085e-14
VBICloDif125228_0700	CD196_0665	808098	808970	873	+	19447555	core	260682417	COG0190H	Methylenetetrahydrofolate dehydrogenase (NADP+) (EC 1.5.1.5) / Methenyltetrahydrofolate cyclohydrolase (EC 3.5.4.9)	folD	222.638	749.783	1.75177	-6.1468	7.90642e-10	9.73269e-09
VBICloDif125228_0701	CD196_0666	809007	809681	675	+	19447557	core	260682418	-	Zinc-finger protein	-	104.836	421.705	2.0081	-7.21265	5.48672e-13	1.02575e-11
VBICloDif125228_0702	CD196_0667	809717	810598	882	+	19447559	core	260682419	COG0685E	5,10-methylenetetrahydrofolate reductase (EC 1.5.1.20)	-	240.922	828.767	1.7824	-6.20881	5.33874e-10	6.71375e-09
VBICloDif125228_0703	CD196_0669	810642	812027	1386	+	19447561	core	260682420	COG1249C	Dihydrolipoamide dehydrogenase (EC 1.8.1.4)	-	62.706	375.201	2.58099	-9.25297	0	0
VBICloDif125228_0704	CD196_0670	812083	812853	771	+	19447563	core	260682421	COG3640D	CO dehydrogenase accessory protein CooC (nickel insertion)	-	115.481	941.967	3.02802	-10.7163	0	0
VBICloDif125228_0705	CD196_0671	812873	813817	945	+	19447565	core	260682422	COG2069C	Acetyl-CoA synthase corrinoid iron-sulfur protein, small subunit	-	75.7413	677.905	3.16193	-11.2626	0	0
VBICloDif125228_0706	CD196_0672	813848	815215	1368	+	19447567	core	260682423	COG1456C	Acetyl-CoA synthase corrinoid iron-sulfur protein, large subunit	-	204.836	1842.54	3.16916	-10.3853	0	0
VBICloDif125228_0707	CD196_0673	815265	816071	807	+	19447569	core	260682424	COG1410E	5-methyltetrahydrofolate:corrinoid iron-sulfur protein methyltransferase	-	391.461	3834.63	3.29214	-10.8001	0	0
VBICloDif125228_0708	CD196_0674	816128	818254	2127	+	19447571	core	260682425	COG1614C	CO dehydrogenase/acetyl-CoA synthase, acetyl-CoA synthase subunit (EC 2.3.1.169)	-	232.542	2528.13	3.4425	-10.6467	0	0
VBICloDif125228_0709	CD196_0675	818341	818718	378	+	19447573	core	260682426	COG0509E	Glycine cleavage system H protein	gcvH	1745.67	11027.3	2.65923	-8.77552	0	0
VBICloDif125228_0710	CD196_0676	818830	820758	1929	+	19447575	core	260682427	COG3894R	Acetyl-CoA synthase corrinoid activation protein	-	25.8537	105.717	2.03176	-7.40762	1.28564e-13	2.55375e-12
VBICloDif125228_0711	CD196_0677	820783	821655	873	+	19447577	core	260682428	COG1856S	putative radical SAM superfamily protein	-	41.5513	132.383	1.67175	-5.69338	1.24552e-08	1.31949e-07
VBICloDif125228_0712	CD196_0678	821652	822590	939	+	19447579	core	260682429	COG2516R	putative radical SAM superfamily protein	-	14.7929	50.1582	1.76158	-5.33684	9.45808e-08	8.54405e-07
VBICloDif125228_0713	CD196_0679	822637	823452	816	+	19447581	core	260682430	COG0095H	Lipoate-protein ligase A	-	68.6072	205.031	1.57941	-5.69554	1.22985e-08	1.31084e-07
VBICloDif125228_0715	CD196_0681	823813	824229	417	+	19447585	core	260682432	-	FIG00514404: hypothetical protein	-	291.434	1015.54	1.80101	-6.66998	2.55831e-11	3.85511e-10
VBICloDif125228_0716	CD196_0682	824245	824595	351	+	19447587	core	260682433	-	FIG00516495: hypothetical protein	-	1411.88	5442.34	1.94661	-6.82722	8.6573e-12	1.35722e-10
VBICloDif125228_0717	CD196_0683	825135	825914	780	+	19447589	core	260682434	COG1387ER	Histidinol-phosphatase (EC 3.1.3.15)	hisK	177.238	62.6032	-1.50138	4.99661	5.83483e-07	4.41527e-06
VBICloDif125228_0731	CD196_0697	844084	844899	816	+	19447619	core	260682447	COG0834ET	probable amino acid ABC transporter	-	42.1147	14.6298	-1.52541	4.28438	1.8325e-05	0.000103832
VBICloDif125228_0733	CD196_0699	845663	846385	723	+	19447623	core	260682449	COG1126E	amino acid ABC transporter, ATP-binding protein	-	85.7538	29.2852	-1.55003	4.65794	3.19385e-06	2.09095e-05
VBICloDif125228_0740	CD196_0705	854453	855187	735	-	19447637	core	260682455	COG1180O	Pyruvate formate-lyase activating enzyme (EC 1.97.1.4)	plfA	211.138	73.0302	-1.53162	5.02418	5.05579e-07	3.89318e-06
VBICloDif125228_0741	CD196_0706	855347	857578	2232	-	19447639	core	260682456	COG1882C	Pyruvate formate-lyase (EC 2.3.1.54)	plfB	2702.94	480.168	-2.49292	6.12418	9.1151e-10	1.11812e-08
VBICloDif125228_0743	CD196_0708	859023	860636	1614	+	19447643	core	260682458	COG0513LKJ	Cold-shock DEAD-box protein A	-	838.109	273.77	-1.61417	5.16912	2.352e-07	1.95311e-06
VBICloDif125228_0744	CD196_0709	860911	862896	1986	+	19447645	core	260682459	COG3711K	Sorbitol operon transcription regulator	-	2.23568	7.81311	1.80518	-4.48934	7.14427e-06	4.44419e-05
VBICloDif125228_0746	CD196_0711	863364	863924	561	+	19447649	core	260682461	COG3730G	PTS system, glucitol/sorbitol-specific IIC component (EC 2.7.1.69)	gutA	6.86955	22.2478	1.69538	-3.74242	0.000182255	0.000842252
VBICloDif125228_0749	CD196_0714	864988	865353	366	+	19447655	core	260682464	COG3731G	PTS system, glucitol/sorbitol-specific IIA component (EC 2.7.1.69)	srlB	4.25085	15.5805	1.87392	-2.42597	0.0152677	0.0392471
VBICloDif125228_0755	CD196_0720	871764	872528	765	+	19447667	core	260682470	COG1191K	RNA polymerase sporulation specific sigma factor SigF	sigF	51.2019	147.556	1.52699	-5.23339	1.6643e-07	1.43664e-06
VBICloDif125228_0760	CD196_0725	876362	877204	843	+	19447677	core	260682475	-	FIG00519676: hypothetical protein	-	21.5996	121.736	2.49468	-8.20265	2.22045e-16	5.54477e-15
VBICloDif125228_0761	CD196_0726	877219	877683	465	+	19447679	core	260682476	-	FIG00521263: hypothetical protein	-	2.81662	15.2073	2.43273	-3.31323	0.000922237	0.00349311
VBICloDif125228_0762	CD196_0727	877697	878842	1146	+	19447681	core	260682477	COG1473R	Catalyzes the cleavage of p-aminobenzoyl-glutamate to p-aminobenzoate and glutamate, subunit A	-	19.0643	203.31	3.41473	-11.8778	0	0
VBICloDif125228_0763	CD196_0728	878886	879821	936	+	19447683	core	260682478	-	FIG00514912: hypothetical protein	-	32.0573	294.298	3.19856	-11.2429	0	0
VBICloDif125228_0770	CD196_0735	887455	889005	1551	+	19447697	core	260682485	COG0488R	ABC transporter ATP-binding protein	-	493.561	156.189	-1.65993	5.86391	4.52089e-09	5.19903e-08
VBICloDif125228_0771	CD196_0736	889034	889669	636	+	19447699	core	260682486	COG4478S	COG4478, integral membrane protein	-	39.0557	8.29695	-2.23488	5.19776	2.01709e-07	1.70332e-06
VBICloDif125228_0774	CD196_0739	891548	892225	678	+	19447705	core	260682489	COG1413C	FOG: HEAT repeat	-	256.078	1145.75	2.16164	-7.8361	4.66294e-15	1.02526e-13
VBICloDif125228_0775	CD196_0740	892311	892754	444	+	19447707	core	260682490	-	Bis(5'-nucleosyl)-tetraphosphatase (Asymmetrical) (EC 3.6.1.17)	-	579.591	3323.16	2.51945	-8.92443	0	0
VBICloDif125228_0782	CD196_0747	897727	898623	897	+	19447721	core	260682497	COG0119E	2-isopropylmalate synthase (EC 2.3.3.13)	-	0.704619	3.55108	2.33334	-2.53065	0.0113851	0.0306408
VBICloDif125228_0792	CD196_0757	910345	910689	345	-	19447741	core	260682507	-	FIG00513452: hypothetical protein	-	296.475	80.0371	-1.88917	5.26921	1.37012e-07	1.2035e-06
VBICloDif125228_0801		917638	917928	291	+	19447759	core			FIG00522869: hypothetical protein		4.9645	28.7052	2.53159	-2.85735	0.00427192	0.0131351
VBICloDif125228_0815	CD196_0779	932692	933876	1185	+	19447787	core	260682529	COG3949S	Branched-chain amino acid transport system carrier protein	-	611.059	177.931	-1.77999	6.36406	1.96484e-10	2.60192e-09
VBICloDif125228_0817	CD196_0781	935825	937018	1194	+	19447791	core	260682531	COG0119E	Homocitrate synthase (EC 2.3.3.14)	aksA	39.7276	473.766	3.57596	-12.2996	0	0
VBICloDif125228_0818	CD196_0782	937043	938968	1926	+	19447793	core	260682532	COG1048C	Aconitate hydratase (EC 4.2.1.3)	-	72.2356	932.706	3.69064	-11.9855	0	0
VBICloDif125228_0819	CD196_0783	938990	939985	996	+	19447795	core	260682533	COG0473CE	Isocitrate dehydrogenase [NAD] (EC 1.1.1.41)	-	45.6775	875.568	4.26066	-14.1979	0	0
VBICloDif125228_0820	CD196_0784	940336	940785	450	+	19447797	core	260682534	COG1846K	Transcriptional regulator, MarR family	-	348.515	72.046	-2.27423	7.07779	1.46483e-12	2.58638e-11
VBICloDif125228_0821	CD196_0785	940819	941313	495	+	19447799	core	260682535	COG1246E	Putative acetyltransferase	-	193.101	46.0173	-2.0691	6.2527	4.03404e-10	5.16594e-09
VBICloDif125228_0827	CD196_0791	945663	946517	855	+	19447811	core	260682541	-	FIG00516357: hypothetical protein	-	33.7928	11.8885	-1.50715	4.12799	3.65948e-05	0.00019562
VBICloDif125228_0838	CD196_0802	956275	957186	912	+	19447833	core	260682552	COG0601EP	Oligopeptide transport system permease protein OppB (TC 3.A.1.5.1)	oppB	128.558	1312.86	3.35222	-11.2907	0	0
VBICloDif125228_0839	CD196_0803	957170	958081	912	+	19447835	core	260682553	COG1173EP	Oligopeptide transport system permease protein oppC (TC 3.A.1.5.1)	oppC	119.705	1506.55	3.65369	-12.1774	0	0
VBICloDif125228_0840	CD196_0804	958194	959762	1569	+	19447837	core	260682554	COG0747E	Oligopeptide ABC transporter, periplasmic oligopeptide-binding protein OppA (TC 3.A.1.5.1)	oppA	346.123	4877.66	3.81683	-11.613	0	0
VBICloDif125228_0841	CD196_0805	959837	960862	1026	+	19447839	core	260682555	COG0444EP	Oligopeptide transport ATP-binding protein OppD (TC 3.A.1.5.1)	oppD	219.65	2077.57	3.24162	-10.8663	0	0
VBICloDif125228_0842	CD196_0806	960855	961799	945	+	19447841	core	260682556	COG1123R	Oligopeptide transport ATP-binding protein OppF (TC 3.A.1.5.1)	oppF	189.615	2048.25	3.43325	-11.6	0	0
VBICloDif125228_0850	CD196_0814	969575	970429	855	+	19447857	core	260682562	COG2110R	COG2110, Macro domain, possibly ADP-ribose binding module	-	96.8574	661.983	2.77286	-9.93859	0	0
VBICloDif125228_0851	CD196_0815	970742	971614	873	+	19447859	core	260682563	COG1073R	FIG00514005: hypothetical protein	-	46.2145	241.864	2.38778	-8.37038	0	0
VBICloDif125228_0861	CD196_0825	980602	981639	1038	-	19447879	shared	260682573	COG2984R	ABC transporter substrate-binding protein	-	111.9	432.652	1.951	-7.16862	7.57616e-13	1.39401e-11
VBICloDif125228_0862	CD196_0826	981736	982491	756	-	19447881	core	260682574	COG1101R	Methionine ABC transporter ATP-binding protein	-	107.345	348.013	1.69689	-6.2479	4.16014e-10	5.30797e-09
VBICloDif125228_0868	CD196_0832	990186	991346	1161	+	19447893	core	260682580	COG0448G	Glucose-1-phosphate adenylyltransferase (EC 2.7.7.27)	glgC	48.4046	170.058	1.81281	-6.59845	4.15483e-11	6.12882e-10
VBICloDif125228_0869	CD196_0833	991348	992478	1131	+	19447895	core	260682581	COG0448G	Glycogen biosynthesis protein GlgD, glucose-1-phosphate adenylyltransferase family	glgD	33.6513	96.7347	1.52337	-5.20604	1.92913e-07	1.6417e-06
VBICloDif125228_0870	CD196_0834	992507	993949	1443	+	19447897	core	260682582	COG0297G	Glycogen synthase, ADP-glucose transglucosylase (EC 2.4.1.21)	glgA	49.9123	157.205	1.65518	-6.11684	9.54518e-10	1.15467e-08
VBICloDif125228_0871	CD196_0835	993963	996383	2421	+	19447899	core	260682583	COG0058G	Glycogen phosphorylase (EC 2.4.1.1)	glgP	126.344	363.331	1.52393	-5.31475	1.06806e-07	9.5742e-07
VBICloDif125228_0874	CD196_0838	999789	1001264	1476	+	19447905	core	260682586	COG1982E	Arginine decarboxylase (EC 4.1.1.19)	speA	7.89243	45.5093	2.52762	-7.90156	2.66454e-15	6.04884e-14
VBICloDif125228_0875	CD196_0839	1001351	1001764	414	+	19447907	core	260682587	COG1586E	S-adenosylmethionine decarboxylase proenzyme (EC 4.1.1.50), prokaryotic class 1B	speD	48.307	222.742	2.20507	-6.85	7.3852e-12	1.163e-10
VBICloDif125228_0876	CD196_0840	1001794	1002645	852	+	19447909	core	260682588	COG0421E	Spermidine synthase (EC 2.5.1.16)	speE	35.6257	150.013	2.0741	-7.08058	1.43552e-12	2.5475e-11
VBICloDif125228_0877	CD196_0841	1002635	1003513	879	+	19447911	core	260682589	COG0010E	Agmatinase (EC 3.5.3.11)	speB	79.4056	259.658	1.7093	-6.23814	4.4281e-10	5.60892e-09
VBICloDif125228_0880	CD196_0844	1006108	1007604	1497	+	19447917	core	260682592	COG4624R	Periplasmic [Fe] hydrogenase (EC 1.12.7.2)	-	311.251	38.3572	-3.02051	10.2253	0	0
VBICloDif125228_0881		1007738	1008088	351	+	19447919	shared			FIG00526683: hypothetical protein		281.377	49.3466	-2.51148	7.00437	2.4809e-12	4.29368e-11
VBICloDif125228_0883	CD196_0846	1010006	1010536	531	+	19447923	core	260682593	COG2333R	metallo-beta-lactamase family protein	-	408.051	103.659	-1.9769	6.58013	4.70035e-11	6.79026e-10
VBICloDif125228_0890	CD196_0852	1017939	1018805	867	+	19447937	core	260682600	COG0053P	Cobalt-zinc-cadmium resistance protein	-	5.6116	16.128	1.52308	-3.74183	0.000182686	0.000842252
VBICloDif125228_0891	CD196_0853	1018946	1020088	1143	+	19447939	core	260682601	COG1453R	FIG00516323: hypothetical protein	-	28.9072	108.193	1.90411	-6.56754	5.1154e-11	7.35944e-10
VBICloDif125228_0892	CD196_0854	1020490	1021710	1221	+	19447941	core	260682602	-	FIG00513705: hypothetical protein	-	25.1082	5.29996	-2.2441	5.38724	7.15481e-08	6.61725e-07
VBICloDif125228_0893	CD196_0855	1021739	1022626	888	+	19447943	core	260682603	COG0382H	UbiA prenyltransferase family membrane protein	-	34.6715	9.35388	-1.89011	4.79615	1.61742e-06	1.13544e-05
VBICloDif125228_0908	CD196_0870	1039036	1042386	3351	+	19447973	core	260682618	COG2199T	FIG00516905: hypothetical protein	-	40.5309	12.367	-1.71253	5.72987	1.0051e-08	1.08452e-07
VBICloDif125228_0926	CD196_0887	1059762	1060511	750	+	19448009	core	260682635	COG0363G	Glucosamine-6-phosphate deaminase (EC 3.5.99.6)	glmD	169.323	502.841	1.57033	-5.80485	6.44239e-09	7.26535e-08
VBICloDif125228_0971	CD196_0931	1128062	1129198	1137	+	19448107	core	260682678	COG1960I	Butyryl-CoA dehydrogenase (EC 1.3.99.2)	bcd2	685.484	173.248	-1.98429	6.92405	4.38893e-12	7.10357e-11
VBICloDif125228_0972	CD196_0932	1129257	1130039	783	+	19448109	core	260682679	COG2086C	Electron transfer flavoprotein, beta subunit	etfB2	601.613	153.671	-1.96899	6.95535	3.51696e-12	5.85491e-11
VBICloDif125228_0973	CD196_0933	1130058	1131068	1011	+	19448111	core	260682680	COG2025C	Electron transfer flavoprotein, alpha subunit	etfA2	239.393	76.8097	-1.64002	5.69416	1.23983e-08	1.31746e-07
VBICloDif125228_0974	CD196_0934	1131087	1131884	798	+	19448113	core	260682681	COG1024I	3-hydroxybutyryl-CoA dehydratase (EC 4.2.1.55)	crt2	506.758	154.634	-1.71243	6.12077	9.31264e-10	1.13045e-08
VBICloDif125228_0975	CD196_0935	1131982	1132827	846	+	19448115	core	260682682	COG1250I	3-hydroxybutyryl-CoA dehydrogenase (EC 1.1.1.157)	hbd	212.215	56.6314	-1.90586	6.29543	3.06555e-10	3.96932e-09
VBICloDif125228_0976	CD196_0936	1132914	1134089	1176	+	19448117	core	260682683	COG0183I	Acetyl-CoA acetyltransferase (EC 2.3.1.9)	thlA1	793.768	272.577	-1.54205	5.29822	1.1694e-07	1.03762e-06
VBICloDif125228_0988	CD196_0950	1144097	1144891	795	-	19448141	core	260682696	COG1387ER	Histidinol-phosphatase (EC 3.1.3.15)	-	155.316	28.8251	-2.42981	7.43991	1.00808e-13	2.01386e-12
VBICloDif125228_1060	CD196_1020	1219379	1219690	312	+	19448287	core	260682766	COG0261J	LSU ribosomal protein L21p	rplU	11386	3610.47	-1.65701	5.21659	1.82245e-07	1.56159e-06
VBICloDif125228_1061	CD196_1021	1219744	1220022	279	+	19448289	core	260682767	COG2868J	FIG139598: Potential ribosomal protein	-	10351.9	3199.42	-1.69402	5.6379	1.72136e-08	1.76996e-07
VBICloDif125228_1062	CD196_1022	1220036	1220326	291	+	19448291	core	260682768	COG0211J	LSU ribosomal protein L27p	rpmA	49644	12739.8	-1.96228	5.05043	4.40817e-07	3.44764e-06
VBICloDif125228_1066	CD196_1026	1223841	1224407	567	-	19448299	core	260682772	-	putative integrase/recombinase	-	118.402	41.7354	-1.50435	4.22843	2.35327e-05	0.000130588
VBICloDif125228_1075	CD196_1035	1234900	1235424	525	+	19448317	core	260682781	COG1399R	COG1399 protein, clustered with ribosomal protein L32p	-	8670.91	2861.15	-1.59959	4.51691	6.27476e-06	3.95254e-05
VBICloDif125228_1076	CD196_1036	1235449	1235625	177	+	19448319	core	260682782	COG0333J	LSU ribosomal protein L32p	rpmF	6063.65	628.877	-3.26934	4.8395	1.30167e-06	9.26808e-06
VBICloDif125228_1079	CD196_1039	1237448	1238434	987	+	19448325	core	260682785	COG0332I	3-oxoacyl-[acyl-carrier-protein] synthase, KASIII (EC 2.3.1.41)	fabH	1474.97	449.453	-1.71444	5.66067	1.50783e-08	1.56421e-07
VBICloDif125228_1080	CD196_1040	1238543	1239472	930	+	19448327	core	260682786	COG2070R	Enoyl-[acyl-carrier-protein] reductase [FMN] (EC 1.3.1.9)	fabK	1391	447.175	-1.63721	5.43876	5.36523e-08	5.06942e-07
VBICloDif125228_1085	CD196_1044	1241493	1242731	1239	+	19448338	core	260682790	COG0304IQ	3-oxoacyl-[acyl-carrier-protein] synthase, KASII (EC 2.3.1.41)	fabF	3907.23	1184.22	-1.72221	4.37985	1.18761e-05	7.03712e-05
VBICloDif125228_1105	CD196_1064	1261102	1261317	216	+	19448378	core	260682810	COG1722L	Exodeoxyribonuclease VII small subunit (EC 3.1.11.6)	xseB	400.181	141.027	-1.50468	3.52402	0.000425059	0.00176695
VBICloDif125228_1128	CD196_1087	1283816	1284490	675	+	19448424	core	260682833	COG4122R	FIG011945: O-methyltransferase family protein	-	644.327	187.248	-1.78284	6.20312	5.53563e-10	6.91287e-09
VBICloDif125228_1134	CD196_1092	1290518	1291945	1428	+	19448436	core	260682838	COG2247M	cell surface protein	-	43.2419	282.892	2.70975	-9.79094	0	0
VBICloDif125228_1148	CD196_1101	1303328	1303837	510	+	19448465	core	260682846	-	Teicoplanin resistance protein	vanZ	131.209	36.8909	-1.83053	5.38207	7.36349e-08	6.75663e-07
VBICloDif125228_1165	CD196_1115	1317782	1318054	273	+	19448499	core	260682860	COG0228J	SSU ribosomal protein S16p	rpsP	4559.28	1539.55	-1.5663	5.68084	1.34038e-08	1.41144e-07
VBICloDif125228_1166	CD196_1116	1318119	1318346	228	+	19448501	core	260682861	COG1837R	KH domain RNA binding protein YlqC	-	872.108	242.711	-1.84527	5.17764	2.24714e-07	1.87494e-06
VBICloDif125228_1171	CD196_1121	1321814	1323106	1293	+	19448511	core	260682866	COG1114E	Branched-chain amino acid transport system carrier protein	-	5.14058	25.1935	2.29305	-6.43937	1.19971e-10	1.65125e-09
VBICloDif125228_1172	CD196_1122	1324226	1325518	1293	+	19448513	core	260682867	COG1114E	Branched-chain amino acid transport system carrier protein	-	1019.77	8731.26	3.09794	-8.84514	0	0
VBICloDif125228_1190	CD196_1140	1345140	1345586	447	+	19448549	core	260682885	COG1959K	Iron-sulfur cluster regulator IscR	-	670.295	124.393	-2.4299	7.96283	1.77636e-15	4.16788e-14
VBICloDif125228_1205	CD196_1155	1360970	1361806	837	-	19448579	core	260682900	COG2207K	AraC-family transcriptional regulator	-	19.5422	6.20927	-1.6541	3.95978	7.50175e-05	0.000374659
VBICloDif125228_1243	CD196_1194	1403611	1404141	531	-	19448655	core	260682939	COG0681U	Signal peptidase I (EC 3.4.21.89)	sip3	974.981	323.256	-1.5927	5.7724	7.81501e-09	8.64597e-08
VBICloDif125228_1244	CD196_1195	1404181	1405005	825	-	19448657	core	260682940	COG1968V	Undecaprenyl-diphosphatase (EC 3.6.1.27)	bacA1	213.331	65.9917	-1.69273	5.62286	1.87822e-08	1.91108e-07
VBICloDif125228_1300	CD196_1252	1461331	1462122	792	+	19448769	core	260682997	COG1540R	Lactam utilization protein LamB	-	56.5338	303.954	2.42667	-8.63352	0	0
VBICloDif125228_1301	CD196_1253	1462151	1463371	1221	+	19448771	core	260682998	COG1914P	Mn2+/Fe2+ transporter, NRAMP family	-	52.5266	274.374	2.38503	-8.68738	0	0
VBICloDif125228_1302	CD196_1254	1463391	1464086	696	+	19448773	core	260682999	COG2049E	Allophanate hydrolase 2 subunit 1 (EC 3.5.1.54)	-	33.1148	158.147	2.25572	-7.51804	5.55112e-14	1.13489e-12
VBICloDif125228_1303	CD196_1255	1464116	1465102	987	+	19448775	core	260683000	COG1984E	Allophanate hydrolase 2 subunit 2 (EC 3.5.1.54)	-	153.273	860.225	2.48861	-8.84121	0	0
VBICloDif125228_1306	CD196_1259	1467325	1468485	1161	+	19448781	core	260683003	COG5505S	FIG00517456: hypothetical protein	-	4.38688	14.1095	1.6854	-4.34538	1.39035e-05	8.1011e-05
VBICloDif125228_1326	CD196_1279	1491706	1492962	1257	+	19448821	core	260683023	COG1058R	Molybdopterin binding motif, CinA N-terminal domain / C-terminal domain of CinA type S	-	217.578	76.7118	-1.50401	5.41147	6.25089e-08	5.85874e-07
VBICloDif125228_1349	CD196_1299	1515418	1516203	786	+	19448867	core	260683043	COG3393R	GCN5-related N-acetyltransferase	-	20.1324	218.211	3.43814	-11.4826	0	0
VBICloDif125228_1383	CD196_1333	1551302	1552393	1092	-	19448935	core	260683077	COG4194R	FIG00518847: hypothetical protein	-	2.07975	5.94062	1.5142	-2.94687	0.00321007	0.0103005
VBICloDif125228_1416	CD196_1365	1588649	1590703	2055	+	19449002	core	260683108	COG0642T	FIG00519132: hypothetical protein	-	24.6685	69.805	1.50066	-5.42663	5.74284e-08	5.39704e-07
VBICloDif125228_1469	CD196_1416	1652096	1652305	210	+	19449108	shared	260683159	-	FIG00517193: hypothetical protein	-	29.846	393.645	3.72128	-4.48526	7.28263e-06	4.5142e-05
VBICloDif125228_1473	CD196_1419	1654687	1655631	945	+	19449116	core	260683162	COG3705E	ATP phosphoribosyltransferase regulatory subunit (EC 2.4.2.17)	hisZ	7.10402	55.1334	2.95622	-8.38863	0	0
VBICloDif125228_1474	CD196_1420	1655653	1656279	627	+	19449118	core	260683163	COG0040E	ATP phosphoribosyltransferase (EC 2.4.2.17)	hisG	10.4446	156.061	3.90128	-11.1458	0	0
VBICloDif125228_1475	CD196_1421	1656313	1657362	1050	+	19449120	core	260683164	COG0079E	Histidinol-phosphate aminotransferase (EC 2.6.1.9)	hisC	6.71456	105.891	3.97915	-12.0285	0	0
VBICloDif125228_1476	CD196_1422	1657365	1657943	579	+	19449122	core	260683165	COG0131E	Imidazoleglycerol-phosphate dehydratase (EC 4.2.1.19)	hisB	21.6593	322.395	3.89577	-12.5745	0	0
VBICloDif125228_1477	CD196_1423	1657945	1658550	606	+	19449124	core	260683166	COG0118E	Imidazole glycerol phosphate synthase amidotransferase subunit (EC 2.4.2.-)	hisH	26.7101	326.989	3.61379	-11.9581	0	0
VBICloDif125228_1478	CD196_1424	1658547	1659269	723	+	19449126	core	260683167	COG0106E	Phosphoribosylformimino-5-aminoimidazole carboxamide ribotide isomerase (EC 5.3.1.16)	hisA	47.8265	388.435	3.02179	-10.5631	0	0
VBICloDif125228_1479	CD196_1425	1659251	1660009	759	+	19449128	core	260683168	COG0107E	Imidazole glycerol phosphate synthase cyclase subunit (EC 4.1.3.-)	hisF	24.1309	183.706	2.92845	-9.6967	0	0
VBICloDif125228_1480	CD196_1426	1660037	1660705	669	+	19449130	core	260683169	COG0139E	Phosphoribosyl-AMP cyclohydrolase (EC 3.5.4.19) / Phosphoribosyl-ATP pyrophosphatase (EC 3.6.1.31)	hisI	14.2034	152.212	3.42178	-10.5578	0	0
VBICloDif125228_1481	CD196_1427	1661506	1662834	1329	+	19449132	core	260683170	COG0531E	Amino acid permease	-	237.534	45.9839	-2.36893	8.12546	4.44089e-16	1.10109e-14
VBICloDif125228_1498		1678827	1679207	381	-	19449166	unique			hypothetical protein		75.1296	21.7446	-1.78873	4.40011	1.08194e-05	6.51029e-05
VBICloDif125228_1518	CD196_1454	1694018	1694992	975	+	19449206	shared	260683197	-	FIG00523362: hypothetical protein	-	29.1764	96.8623	1.73114	-5.65348	1.57234e-08	1.62151e-07
VBICloDif125228_1535	CD196_1467	1706764	1707234	471	+	19449240	core	260683210	-	Phage tail fibers	-	3.62488	11.528	1.66913	-2.57885	0.00991287	0.0272916
VBICloDif125228_1555	CD196_1485	1724432	1724998	567	+	19449280	shared	260683228	-	hypothetical protein	-	3.30269	12.1178	1.87541	-3.05614	0.00224207	0.00751512
VBICloDif125228_1576	CD196_1502	1748219	1749436	1218	+	19449323	shared	260683244	COG0460E	Homoserine dehydrogenase (EC 1.1.1.3)	hom2	4.95389	1.28688	-1.94469	3.59577	0.000323433	0.00138739
VBICloDif125228_1579	CD196_1505	1751777	1752529	753	-	19449329	core	260683247	COG0596R	FIG00514516: hypothetical protein	-	44.1804	140.325	1.66729	-5.62692	1.83456e-08	1.87533e-07
VBICloDif125228_1582	CD196_1508	1754487	1755437	951	+	19449335	core	260683250	COG2971G	N-acetylglucosamine kinase of eukaryotic type (EC 2.7.1.59)	-	2.66274	11.5319	2.11464	-4.34208	1.4114e-05	8.21007e-05
VBICloDif125228_1583	CD196_1509	1755430	1756614	1185	+	19449337	core	260683251	-	FIG00517058: hypothetical protein	-	0.597656	3.67704	2.62116	-3.19738	0.0013868	0.00496239
VBICloDif125228_1584	CD196_1510	1756627	1758123	1497	+	19449339	core	260683252	COG1129G	Ribose ABC transport system, ATP-binding protein RbsA (TC 3.A.1.2.1)	-	0.672299	11.6892	4.11993	-6.53464	6.3761e-11	9.06757e-10
VBICloDif125228_1585	CD196_1511	1758146	1759096	951	+	19449341	core	260683253	COG1172G	Ribose ABC transport system, permease protein RbsC (TC 3.A.1.2.1)	-	0.8363	12.1283	3.85821	-5.07323	3.91122e-07	3.0866e-06
VBICloDif125228_1586	CD196_1512	1759117	1760079	963	+	19449343	core	260683254	COG1879G	Ribose ABC transport system, periplasmic ribose-binding protein RbsB (TC 3.A.1.2.1)	-	2.96375	34.6042	3.54545	-8.02751	8.88178e-16	2.17138e-14
VBICloDif125228_1591	CD196_1517	1766273	1767181	909	+	19449353	core	260683259	COG0031E	Cysteine synthase (EC 2.5.1.47)	cysM	508.569	48.6275	-3.3866	10.784	0	0
VBICloDif125228_1592	CD196_1518	1767208	1767798	591	+	19449355	core	260683260	COG1045E	Serine acetyltransferase (EC 2.3.1.30)	cysA	1032.7	88.8727	-3.53854	11.1215	0	0
VBICloDif125228_1616	CD196_1541	1790446	1791171	726	+	19449403	core	260683283	COG1131V	ABC-type multidrug transport system, ATPase component	-	159.839	47.5845	-1.74806	5.53727	3.07229e-08	3.00861e-07
VBICloDif125228_1658	CD196_1583	1845696	1846013	318	-	19449489	core	260683325	COG3123S	conserved hypothetical protein	-	2786.77	12089.7	2.11711	-6.8786	6.0445e-12	9.60526e-11
VBICloDif125228_1663	CD196_1587	1852854	1853816	963	+	19449499	core	260683329	COG0031E	Cysteine synthase (EC 2.5.1.47)	cysK	343.694	1840.67	2.42104	-8.22523	2.22045e-16	5.54477e-15
VBICloDif125228_1682	CD196_1605	1870977	1871945	969	+	19449537	core	260683347	COG1957F	preQ1-regulated inosine-uridine nucleoside hydrolase (EC 3.2.2.1)	iunH	1644.57	327.105	-2.32988	7.5566	4.13003e-14	8.54354e-13
VBICloDif125228_1683	CD196_1606	1871947	1872510	564	+	19449539	core	260683348	-	Substrate-specific component STY3230 of queuosine-regulated ECF transporter	-	3158.64	660.686	-2.25727	7.37528	1.64091e-13	3.22282e-12
VBICloDif125228_1684	CD196_1607	1872518	1873207	690	+	19449541	core	260683349	COG1244R	FIG00519969: hypothetical protein	-	174.794	23.4581	-2.8975	8.18201	2.22045e-16	5.54477e-15
VBICloDif125228_1709	CD196_1631	1895967	1897361	1395	+	19449591	core	260683373	COG1288S	Arginine/ornithine antiporter ArcD	-	1.30783	3.70493	1.50227	-2.70996	0.0067291	0.0195228
VBICloDif125228_1723	CD196_1644	1909377	1909661	285	-	19449620	core	260683385	-	FIG00514138: hypothetical protein	-	208.811	64.5386	-1.69396	4.31876	1.56911e-05	9.06715e-05
VBICloDif125228_1731	CD196_1651	1914496	1916115	1620	-	19449636	core	260683392	COG1283P	Sodium-dependent phosphate transporter	-	47.6718	11.9231	-1.99938	6.10568	1.02361e-09	1.23398e-08
VBICloDif125228_1746	CD196_1664	1931410	1931634	225	-	19449666	core	260683405	COG1918P	putative ferrous iron transport protein A	-	246.286	843.366	1.77582	-5.14245	2.7118e-07	2.22546e-06
VBICloDif125228_1756	CD196_1673	1942054	1942731	678	+	19449686	core	260683414	-	putative ABC transporter, permease protein	-	3.77513	16.1769	2.09933	-4.14232	3.43805e-05	0.00018463
VBICloDif125228_1757	CD196_1674	1942728	1943444	717	+	19449688	core	260683415	-	D-alanyl-D-alanine carboxypeptidase (EC 3.4.16.4)	-	3.54812	11.4125	1.68549	-3.29561	0.000982073	0.00369572
VBICloDif125228_1760	CD196_1677	1944283	1944744	462	+	19449694	core	260683418	-	FIG00515612: hypothetical protein	-	4.9849	15.8351	1.66749	-2.85164	0.00434943	0.0133266
VBICloDif125228_1772	CD196_1687	1953633	1954649	1017	+	19449719	core	260683427	COG0057G	NAD-dependent glyceraldehyde-3-phosphate dehydrogenase (EC 1.2.1.12)	gapA	64.4008	570.546	3.14719	-10.4452	0	0
VBICloDif125228_1773	CD196_1688	1955146	1956213	1068	+	19449721	core	260683428	-	FIG00513847: hypothetical protein	-	1322.37	250.518	-2.40015	7.96355	1.77636e-15	4.16788e-14
VBICloDif125228_1790	CD196_1705	1976303	1977502	1200	+	19449755	core	260683445	COG0137E	Argininosuccinate synthase (EC 6.3.4.5)	argG	117.584	40.2026	-1.54833	5.1872	2.13482e-07	1.79269e-06
VBICloDif125228_1802	CD196_1716	1985964	1986911	948	-	19449779	core	260683456	COG2221C	Dissimilatory sulfite reductase (desulfoviridin), alpha and beta subunits	-	33.7525	124.742	1.88589	-6.48701	8.75591e-11	1.22443e-09
VBICloDif125228_1803	CD196_1717	1986914	1988545	1632	-	19449781	core	260683457	COG0446R	NADH dehydrogenase (EC 1.6.99.3)	-	40.4338	142.465	1.81697	-6.71733	1.85079e-11	2.86299e-10
VBICloDif125228_1809	CD196_1722	1992300	1993190	891	+	19449793	core	260683462	COG0491R	putative hydrolase	-	7.35299	23.6387	1.68475	-4.44729	8.69596e-06	5.3523e-05
VBICloDif125228_1853	CD196_1766	2049034	2050083	1050	-	19449881	core	260683506	COG0715P	ABC transporter substrate-binding protein	-	1.2229	3.65304	1.57879	-2.42081	0.0154859	0.0395894
VBICloDif125228_1855	CD196_1768	2051345	2051836	492	-	19449885	core	260683508	COG3760S	FIG042921: similarity to aminoacyl-tRNA editing enzymes YbaK, ProX	-	20.9517	233.394	3.47763	-10.3349	0	0
VBICloDif125228_1869	CD196_1782	2061283	2062413	1131	+	19449913	core	260683521	COG1454C	Alcohol dehydrogenase (EC 1.1.1.1)	pduQ	43.8781	3.13878	-3.80523	9.13351	0	0
VBICloDif125228_1875	CD196_1788	2067175	2068539	1365	+	19449925	core	260683527	COG4303E	Ethanolamine ammonia-lyase heavy chain (EC 4.3.1.7)	eutB	33.9417	4.49494	-2.91669	7.68171	1.57652e-14	3.3403e-13
VBICloDif125228_1876	CD196_1789	2068552	2069433	882	+	19449927	core	260683528	COG4302E	Ethanolamine ammonia-lyase light chain (EC 4.3.1.7)	eutC	14.7452	1.90942	-2.94904	5.54618	2.91981e-08	2.86732e-07
VBICloDif125228_1877	CD196_1790	2069453	2070106	654	+	19449929	core	260683529	COG4816E	Ethanolamine utilization polyhedral-body-like protein EutL	eutL	94.9495	9.04657	-3.39172	8.64824	0	0
VBICloDif125228_1878	CD196_1791	2070117	2070818	702	+	19449931	core	260683530	COG4577QC	Ethanolamine utilization polyhedral-body-like protein EutM	-	8.93047	0.733821	-3.60524	3.63706	0.000275763	0.0011976
VBICloDif125228_1879	CD196_1792	2070821	2072290	1470	+	19449933	core	260683531	COG1012C	Acetaldehyde dehydrogenase, ethanolamine utilization cluster	-	33.3595	3.48904	-3.2572	8.34999	0	0
VBICloDif125228_1880	CD196_1793	2072386	2072673	288	+	19449935	core	260683532	COG4577QC	Ethanolamine utilization protein similar to PduA/PduJ	eutM	302.202	11.7547	-4.68421	8.99681	0	0
VBICloDif125228_1881	CD196_1794	2072800	2073561	762	+	19449937	core	260683533	COG4812E	ATP:Cob(I)alamin adenosyltransferase (EC 2.5.1.17), ethanolamine utilization	eutT	11.0325	1.32685	-3.05568	4.49216	7.05038e-06	4.39361e-05
VBICloDif125228_1882	CD196_1795	2073574	2074203	630	+	19449939	core	260683534	COG4869Q	Ethanolamine utilization protein similar to PduL	-	20.1665	2.1336	-3.2406	5.4559	4.87251e-08	4.6415e-07
VBICloDif125228_1883	CD196_1796	2074245	2074970	726	+	19449941	core	260683535	-	Protein clustered with ethanolamine utilization	-	14.4756	1.99615	-2.85834	4.86996	1.1162e-06	8.06244e-06
VBICloDif125228_1886	CD196_1800	2075811	2076902	1092	+	19449947	core	260683538	COG3192E	Ethanolamine permease	eutH	29.6404	3.69233	-3.00496	7.11685	1.10423e-12	1.96958e-11
VBICloDif125228_1887	CD196_1801	2076904	2077377	474	+	19449949	core	260683539	COG4766E	Ethanolamine utilization protein EutQ	eutQ	10.8213	3.0707	-1.81724	2.74724	0.00600996	0.0176265
VBICloDif125228_1889	CD196_1803	2078793	2079968	1176	+	19449953	shared	260683541	COG1473R	putative peptidase( EC:3.5.1.14 )	-	1.81784	18.2937	3.33105	-6.87424	6.23235e-12	9.85895e-11
VBICloDif125228_1890	CD196_1805	2080003	2081541	1539	+	19449955	shared	260683542	COG2978H	Aminobenzoyl-glutamate transport protein	-	2.37762	17.2504	2.85904	-7.14311	9.12381e-13	1.65269e-11
VBICloDif125228_1891	CD196_1806	2081573	2082775	1203	+	19449957	shared	260683543	COG1168E	Putative aminotransferase	-	1.87537	11.0439	2.558	-5.20595	1.93003e-07	1.6417e-06
VBICloDif125228_1914	CD196_1829	2104447	2105850	1404	-	19450003	core	260683565	COG0642T	sensor histidine kinase	-	10.15	3.21204	-1.65991	4.04053	5.33298e-05	0.000273775
VBICloDif125228_1915	CD196_1830	2106349	2107209	861	+	19450005	core	260683566	COG1284S	hypothetical protein BH3604	-	159.999	40.8665	-1.96908	6.28691	3.23839e-10	4.16229e-09
VBICloDif125228_1918	CD196_1833	2109202	2110401	1200	+	19450011	core	260683569	COG1478S	Conserved protein	-	830.238	275.331	-1.59236	5.45706	4.84073e-08	4.62382e-07
VBICloDif125228_1971	CD196_1882	2167499	2167927	429	-	19450117	core	260683618	COG0426C	Flavodoxin	fldX	12.0945	39.8146	1.71895	-3.67173	0.000240912	0.00106611
VBICloDif125228_2022	CD196_1928	2219759	2220022	264	+	19450219	core	260683664	-	FIG00512889: hypothetical protein	-	73.633	210.99	1.51875	-4.07772	4.54791e-05	0.000237661
VBICloDif125228_2059	CD196_1965	2266919	2267707	789	-	19450293	core	260683701	COG1319C	Xanthine dehydrogenase, FAD binding subunit (EC 1.17.1.4)	-	91.0028	28.2107	-1.68967	5.17111	2.3271e-07	1.93703e-06
VBICloDif125228_2064	CD196_1969	2272648	2273355	708	-	19450303	core	260683705	COG1131V	ABC transporter, ATP-binding protein	-	155.87	42.241	-1.88363	5.81025	6.23788e-09	7.05749e-08
VBICloDif125228_2102	CD196_2002	2314574	2315278	705	-	19450379	core	260683738	COG0528F	Uridylate kinase (EC 2.7.4.-)	pyrH	1569.09	453.196	-1.79172	6.18124	6.35985e-10	7.91246e-09
VBICloDif125228_2103	CD196_2003	2315363	2316274	912	-	19450381	core	260683739	COG0264J	Translation elongation factor Ts	tsf	2553.86	594.85	-2.10208	6.48631	8.79645e-11	1.2252e-09
VBICloDif125228_2104	CD196_2004	2316353	2317066	714	-	19450383	core	260683740	COG0052J	SSU ribosomal protein S2p (SAe)	rpsB	7028.53	2113.1	-1.73386	4.68415	2.81122e-06	1.85785e-05
VBICloDif125228_2112	CD196_2012	2326362	2327621	1260	-	19450399	core	260683748	COG2720V	Vancomycin B-type resistance protein VanW	-	750.45	220.038	-1.77001	6.04407	1.50278e-09	1.78092e-08
VBICloDif125228_2115	CD196_2014	2329186	2330283	1098	-	19450405	core	260683750	COG5505S	FIG00513802: hypothetical protein	-	736.479	175.073	-2.07269	7.21893	5.24025e-13	9.90266e-12
VBICloDif125228_2122	CD196_2021	2336803	2338128	1326	-	19450419	core	260683757	COG0160E	Siderophore biosynthesis diaminobutyrate--2-oxoglutarate aminotransferase (EC 2.6.1.76)	gabT	68.5493	468.866	2.77396	-9.96514	0	0
VBICloDif125228_2137	CD196_2034	2351726	2352787	1062	-	19450449	core	260683770	COG1301C	Proton/sodium-glutamate symport protein	-	6306.01	128.018	-5.62231	14.821	0	0
VBICloDif125228_2138	CD196_2035	2353379	2354128	750	-	19450451	core	260683771	COG1126E	ABC-type polar amino acid transport system, ATPase component	-	454.643	105.223	-2.11128	7.3786	1.59872e-13	3.1577e-12
VBICloDif125228_2139	CD196_2036	2354237	2355412	1176	-	19450453	core	260683772	COG1473R	N-acetyl-L,L-diaminopimelate deacetylase (EC 3.5.1.47)	-	388.896	77.2588	-2.33161	8.21242	2.22045e-16	5.54477e-15
VBICloDif125228_2140	CD196_2037	2355545	2356342	798	-	19450455	core	260683773	COG0834ET	FIG00519044: hypothetical protein	-	1418.4	156.788	-3.17738	10.725	0	0
VBICloDif125228_2141	CD196_2038	2356402	2356863	462	-	19450457	core	260683774	COG0765E	probable amino-acid ABC transporter, permease protein	-	2207.17	282.871	-2.96398	10.1733	0	0
VBICloDif125228_2142	CD196_2039	2357300	2357968	669	-	19450459	core	260683775	COG0765E	FIG00518237: hypothetical protein	-	959.823	166.13	-2.53046	8.83411	0	0
VBICloDif125228_2143	CD196_2040	2357961	2358764	804	-	19450461	core	260683776	COG0834ET	Cystine ABC transporter, periplasmic cystine-binding protein FliY	-	1299.53	228.444	-2.50808	8.68964	0	0
VBICloDif125228_2197	CD196_2094	2425168	2425620	453	-	19450569	core	260683830	COG2731G	probable beta-D-galactosidase	-	77.8216	230.818	1.56851	-5.12881	2.91573e-07	2.36506e-06
VBICloDif125228_2198	CD196_2095	2425750	2427252	1503	-	19450571	core	260683831	COG0591ER	Predicted sialic acid transporter	-	157.192	479.486	1.60896	-5.76445	8.19261e-09	9.03513e-08
VBICloDif125228_2199	CD196_2096	2427285	2428166	882	-	19450573	core	260683832	COG0329EM	N-acetylneuraminate lyase (EC 4.1.3.3)	nanA	55.3476	167.237	1.5953	-5.66378	1.48072e-08	1.54526e-07
VBICloDif125228_2200	CD196_2097	2428236	2428907	672	-	19450575	core	260683833	COG3010G	N-acetylmannosamine-6-phosphate 2-epimerase (EC 5.1.3.9)	nanE	132.017	376.149	1.51058	-5.60492	2.0835e-08	2.09911e-07
VBICloDif125228_2209	CD196_2106	2441632	2442453	822	-	19450593	core	260683842	COG0714R	ATPase associated with various cellular activities, AAA_5	-	43.9736	128.456	1.54657	-5.26466	1.40448e-07	1.23059e-06
VBICloDif125228_2219		2453225	2453977	753	+	19450613	core			Di-/tripeptide transporter		84.7394	22.2723	-1.92778	5.70093	1.19154e-08	1.27389e-07
VBICloDif125228_2222	CD196_2118	2456733	2458124	1392	-	19450619	core	260683853	COG3104E	Di/tripeptide permease YjdL	-	161.905	706.123	2.12477	-7.49618	6.57252e-14	1.32818e-12
VBICloDif125228_2228	CD196_2124	2465424	2467343	1920	-	19450631	core	260683859	COG1299G	PTS system, fructose-specific IIA component (EC 2.7.1.69) / PTS system, fructose-specific IIB component (EC 2.7.1.69) / PTS system, fructose-specific IIC component (EC 2.7.1.69)	-	1116.05	37.2263	-4.90594	14.7501	0	0
VBICloDif125228_2229	CD196_2125	2467380	2468297	918	-	19450633	core	260683860	COG1105G	1-phosphofructokinase (EC 2.7.1.56)	fruK	477.677	16.2109	-4.881	14.5114	0	0
VBICloDif125228_2268	CD196_2161	2510768	2512270	1503	-	19450711	core	260683897	COG1109G	Phosphomannomutase (EC 5.4.2.8)	-	801.037	101.169	-2.9851	9.93613	0	0
VBICloDif125228_2269	CD196_2162	2512380	2513045	666	-	19450713	core	260683898	COG0036G	Ribulose-phosphate 3-epimerase (EC 5.1.3.1)	rpe	254.119	62.4804	-2.02403	6.58368	4.58935e-11	6.65742e-10
VBICloDif125228_2270	CD196_2163	2513084	2513530	447	-	19450715	core	260683899	COG0698G	Ribose 5-phosphate isomerase B (EC 5.3.1.6)	rpiB1	394.669	113.962	-1.79209	5.795	6.83206e-09	7.65542e-08
VBICloDif125228_2271	CD196_2164	2513705	2514625	921	-	19450717	core	260683900	COG3958G	Transketolase, C-terminal section (EC 2.2.1.1)	tkt'	2443.65	423.801	-2.52758	7.97649	1.55431e-15	3.69651e-14
VBICloDif125228_2272	CD196_2165	2514628	2515440	813	-	19450719	core	260683901	COG3959G	Transketolase, N-terminal section (EC 2.2.1.1)	tkt	2869.53	506.938	-2.50093	7.88707	3.10862e-15	7.01145e-14
VBICloDif125228_2274	CD196_2167	2516563	2517615	1053	-	19450723	core	260683903	COG1063ER	Galactitol-1-phosphate 5-dehydrogenase (EC 1.1.1.251)	gatD	2.03642	8.08331	1.98891	-3.89424	9.85079e-05	0.000481656
VBICloDif125228_2275	CD196_2168	2517745	2519019	1275	-	19450725	core	260683904	COG3775G	PTS system, galactitol-specific IIC component (EC 2.7.1.69)	gatC	6.61363	44.8386	2.76123	-8.27912	2.22045e-16	5.54477e-15
VBICloDif125228_2276	CD196_2169	2519078	2519353	276	-	19450727	core	260683905	COG3414G	PTS system, galactitol-specific IIB component (EC 2.7.1.69)	gatB	6.76522	54.797	3.01789	-3.67137	0.000241257	0.00106629
VBICloDif125228_2277	CD196_2170	2519414	2519872	459	-	19450729	core	260683906	COG1762GT	PTS system, galactitol-specific IIA component (EC 2.7.1.69)	gatA	1.55181	10.2415	2.72241	-2.65881	0.00784179	0.0222885
VBICloDif125228_2292	CD196_2185	2539650	2541041	1392	-	19450759	core	260683921	COG1012C	Succinate-semialdehyde dehydrogenase, CoA-dependent	sucD	152.745	16.4315	-3.21659	10.0028	0	0
VBICloDif125228_2293	CD196_2186	2541072	2542616	1545	-	19450761	core	260683922	COG0427C	Succinyl-CoA:coenzyme A transferase (EC 2.8.3.-)	cat1	113.307	13.5607	-3.06273	9.43136	0	0
VBICloDif125228_2294	CD196_2187	2542643	2544028	1386	-	19450763	core	260683923	COG2985R	FIG00516592: hypothetical protein	-	71.561	9.93854	-2.84807	8.49087	0	0
VBICloDif125228_2295	CD196_2188	2544514	2545335	822	+	19450765	core	260683924	COG0583K	transcriptional regulator, LysR family	-	8.23481	1.89315	-2.12095	3.47383	0.000513095	0.00207359
VBICloDif125228_2297	CD196_2190	2546234	2547313	1080	-	19450769	core	260683926	COG0006E	Aminopeptidase YpdF (MP-, MA-, MS-, AP-, NP- specific)	-	251.975	1063.22	2.07709	-7.29478	2.99094e-13	5.80907e-12
VBICloDif125228_2298	CD196_2191	2547623	2548768	1146	-	19450771	core	260683927	COG0416I	Glycine/sarcosine/betaine reductase component C chain 2	grdD	10.0754	30.0404	1.57607	-4.65932	3.17251e-06	2.08088e-05
VBICloDif125228_2299	CD196_2192	2548779	2550311	1533	-	19450773	core	260683928	COG3425I	Glycine/sarcosine/betaine reductase component C chain 1	grdC	9.07742	38.3098	2.07736	-6.5174	7.1537e-11	1.00844e-09
VBICloDif125228_2301	CD196_2194	2551910	2552383	474	-	19450777	core	260683930	-	Glycine/sarcosine/betaine reductase protein A @ selenocysteine-containing	grdA	9.77154	37.9571	1.95771	-4.50546	6.62303e-06	4.15689e-05
VBICloDif125228_2302	CD196_2195	2552495	2553781	1287	-	19450779	core	260683931	-	Glycine reductase component B beta subunit (EC 1.21.4.2) / Glycine reductase component B alpha subunit (EC 1.21.4.2)	grdE	5.44113	29.2245	2.4252	-6.93504	4.06097e-12	6.66534e-11
VBICloDif125228_2304	CD196_2197	2554452	2555399	948	-	19450783	core	260683933	COG0492O	Thioredoxin reductase (EC 1.8.1.9)	trxB3	6.35003	51.3548	3.01566	-8.58036	0	0
VBICloDif125228_2305	CD196_2198	2555495	2555866	372	-	19450785	core	260683934	-	GrdX protein	grdX	2.87249	16.3355	2.50764	-2.7552	0.00586556	0.0173632
VBICloDif125228_2310	CD196_2202	2560209	2560961	753	-	19450795	core	260683938	COG1116P	ABC transporter ATP-binding protein	-	1805.8	535.003	-1.75502	5.92408	3.14042e-09	3.6354e-08
VBICloDif125228_2313	CD196_2204	2561728	2562291	564	-	19450801	core	260683939	-	FIG00518080: hypothetical protein	-	857.075	292.885	-1.54909	5.66499	1.47034e-08	1.53901e-07
VBICloDif125228_2316	CD196_2207	2563656	2564114	459	-	19450807	core	260683942	-	FIG00517508: hypothetical protein	-	661.313	162.15	-2.028	6.89793	5.27667e-12	8.50103e-11
VBICloDif125228_2317	CD196_2208	2564107	2565192	1086	-	19450809	core	260683943	COG0701R	Transporter	-	337.694	109.894	-1.61961	5.87592	4.20491e-09	4.8516e-08
VBICloDif125228_2320	CD196_2211	2566154	2566990	837	-	19450815	core	260683946	COG0157H	Quinolinate phosphoribosyltransferase [decarboxylating] (EC 2.4.2.19)	nadC	17.6344	108.19	2.6171	-8.07176	6.66134e-16	1.64e-14
VBICloDif125228_2321	CD196_2212	2566971	2568272	1302	-	19450817	core	260683947	COG0029H	L-aspartate oxidase (EC 1.4.3.16)	nadB	32.0904	207.244	2.69112	-8.87761	0	0
VBICloDif125228_2322	CD196_2213	2568285	2569199	915	-	19450819	core	260683948	COG0379H	Quinolinate synthetase (EC 2.5.1.72)	nadA	13.3261	124.779	3.22705	-9.88089	0	0
VBICloDif125228_2324	CD196_2215	2571297	2571725	429	+	19450823	core	260683950	-	FIG00513578: hypothetical protein	-	18.7052	4.73151	-1.98307	3.40961	0.000650563	0.00254688
VBICloDif125228_2325	CD196_2216	2571785	2572093	309	+	19450825	core	260683951	-	FIG00517411: hypothetical protein	-	109.143	25.5962	-2.09222	4.71429	2.42551e-06	1.64333e-05
VBICloDif125228_2329	CD196_2220	2574921	2575991	1071	-	19450833	core	260683955	COG3426C	Butyrate kinase (EC 2.7.2.7)	-	186.468	2621.94	3.81363	-12.1437	0	0
VBICloDif125228_2330	CD196_2221	2576044	2576619	576	-	19450835	core	260683956	COG1014C	Indolepyruvate oxidoreductase subunit IorB (EC 1.2.7.8)	iorB	12.1018	1389.91	6.84362	-19.8655	0	0
VBICloDif125228_2331	CD196_2222	2576621	2578408	1788	-	19450837	core	260683957	COG4231C	Indolepyruvate oxidoreductase subunit IorA (EC 1.2.7.8)	iorA	11.4962	1058.7	6.52499	-19.8566	0	0
VBICloDif125228_2332	CD196_2223	2578469	2579728	1260	-	19450839	core	260683958	COG1448E	Biosynthetic Aromatic amino acid aminotransferase alpha (EC 2.6.1.57) @ Aspartate aminotransferase (EC 2.6.1.1)	-	10.7798	852.002	6.30446	-19.4945	0	0
VBICloDif125228_2334	CD196_2225	2581998	2583884	1887	-	19450843	core	260683960	COG2199T	FIG00521324: hypothetical protein	-	59.3662	17.0833	-1.79706	5.7565	8.5877e-09	9.43057e-08
VBICloDif125228_2336	CD196_2227	2585883	2586302	420	-	19450847	core	260683962	-	conserved hypothetical protein	-	44.1823	13.0267	-1.762	3.96775	7.25534e-05	0.000363912
VBICloDif125228_2354	CD196_2240	2600334	2601362	1029	-	19450883	core	260683975	COG5018R	FIG00517435: hypothetical protein	-	24.2175	6.28847	-1.94527	4.96164	6.99002e-07	5.18834e-06
VBICloDif125228_2355	CD196_2241	2601410	2602270	861	-	19450885	core	260683976	COG0037D	tRNA(Cytosine32)-2-thiocytidine synthetase	-	178.804	53.4933	-1.74095	5.78862	7.09665e-09	7.87615e-08
VBICloDif125228_2362	CD196_2248	2608192	2608677	486	-	19450899	core	260683983	COG1846K	Transcriptional regulator, MarR family	-	274.764	87.1401	-1.65678	5.25063	1.51584e-07	1.31498e-06
VBICloDif125228_2369	CD196_2254	2616674	2619301	2628	-	19450913	core	260683989	COG0574G	Pyruvate,phosphate dikinase (EC 2.7.9.1)	ppdK	226.418	1241.35	2.45484	-7.15195	8.55538e-13	1.55779e-11
VBICloDif125228_2372	CD196_2257	2621285	2622577	1293	-	19450919	core	260683992	COG4091E	Homoserine dehydrogenase (EC 1.1.1.3); Sorbitol-6-phosphate 2-dehydrogenase (EC 1.1.1.140)	-	3.11712	12.0276	1.94807	-4.78316	1.72564e-06	1.20176e-05
VBICloDif125228_2376	CD196_2261	2625628	2626641	1014	-	19450927	core	260683996	COG3732G	PTS system, glucitol/sorbitol-specific IIB component and second of two IIC components (EC 2.7.1.69)	srlE	0.872559	15.3202	4.13404	-5.59631	2.18965e-08	2.1881e-07
VBICloDif125228_2407	CD196_2291	2656444	2656887	444	-	19450989	core	260684026	COG1610S	Transamidase GatB domain protein	rpsU	14203.2	4604.57	-1.62507	4.38484	1.16071e-05	6.90109e-05
VBICloDif125228_2408	CD196_2292	2656917	2657096	180	-	19450991	core	260684027	COG0828J	SSU ribosomal protein S21p	rpsU	11077.4	1032.36	-3.4236	7.50352	6.21725e-14	1.26369e-12
VBICloDif125228_2418	CD196_2302	2667883	2668992	1110	+	19451011	core	260684037	COG3839G	Multiple sugar ABC transporter, ATP-binding protein	-	473.828	56.686	-3.0633	10.3292	0	0
VBICloDif125228_2436	CD196_2319	2689375	2689683	309	+	19451047	core	260684054	COG0268J	SSU ribosomal protein S20p	rpsT	644.03	218.604	-1.55881	4.89177	9.99331e-07	7.26333e-06
[truncated: 192 more rows]

## Sheet: R20291
Differentially expressed genes in strain C. difficile R20291 during nutrient shift
[truncated: 661 more rows]
